# Supplementary material for: Kinetics of ligand exchange in solution: a quantitative mass spectrometry approach
Source: Chem Sci. 2023 Aug 24;14(36):9759–69. doi: 10.1039/d3sc03342b (PMC10510763; doi:10.1039/d3sc03342b)
Supplement: SC-014-D3SC03342B-s002 [file SC-014-D3SC03342B-s002.xlsx]

## Sheet: MAIN
README										Figure S1																												Figure S5
										DRL - CoC-Cl (5uM) + Various equiv. pyridine and pyridine-D5 (1:1)																												DRL - CoC-Cl (5uM) + 1.25 equiv. pyridine and pyridine-D5 (1:1)
Delayed reactant labeling data recorded on a Bruker timsTOF ESI-ToF instrument										CHCl3 - 24°C - 2 min delay between addition of pyridine and pyridine-D5																												CHCl3 - 24°C - Various delays between addition of pyridine and pyridine-D5 (5 replica per delay)
Equilibria between metal porphyrin complexes and pyridine ligands										2.5+2.5				5+5				12.5+12.5				25+25				50+50				100+100				200+200				0.5min R1				0.5min R2				0.5min R3
										Time	[CoC(Py)]+	[CoC(PyL)]+		Time	[CoC(Py)]+	[CoC(PyL)]+		Time	[CoC(Py)]+	[CoC(PyL)]+		Time	[CoC(Py)]+	[CoC(PyL)]+		Time	[CoC(Py)]+	[CoC(PyL)]+		Time	[CoC(Py)]+	[CoC(PyL)]+		Time	[CoC(Py)]+	[CoC(PyL)]+		Time	[CoC(Py)]+	[CoC(PyL)]+		Time	[CoC(Py)]+	[CoC(PyL)]+		Time	[CoC(Py)]+	[CoC(PyL)]+
Data are presented for each figure of the related paper										0	0.97998	0.02002		0	0.99983	0.000167289		0	0.97846	0.02154		0	1.01172	-0.01172		0	0.99642	0.00358		0	1.00192	-0.00192		0	0.99869	0.00131		0	1.00024	-0.000243984		0	0.97393	0.02607		0	1.01172	-0.01172
(Kinetics of Ligand Exchange in Solution: A Quantitative Mass Spectrometry Approach - Q. Duez, P. Tinnemans, J. A. A. W. Elemans and J. Roithová)										0.256	0.97089	0.02911		0.255	1.01172	-0.01172		0.256	0.97645	0.02355		0.255	0.96396	0.03604		0.256	0.99416	0.00584		0.236	0.99431	0.00569		0.238	1.01172	-0.01172		0.255	1.01172	-0.01172		0.256	0.96525	0.03475		0.255	1.01172	-0.01172
Ion intensities for porphyrin-pyridine complexes are normalized by the total ion current (TIC), and the non-labeled/labeled intensities are renormalized together.										0.513	1.01172	-0.01172		0.512	0.99271	0.00729		0.512	0.97347	0.02653		0.512	0.97896	0.02104		0.511	0.997	0.003		0.473	0.99366	0.00634		0.474	1.0024	-0.0024		0.512	0.99667	0.00333		0.512	0.9668	0.0332		0.509	0.99995	5.21184e-05
Relative proportions are shown with t = 0 being the time at the addition of the D5-labeled pyridine.										0.768	0.9604	0.0396		0.767	0.99138	0.00862		0.768	0.97718	0.02282		0.768	1.01172	-0.01172		0.768	0.99648	0.00352		0.709	1.01172	-0.01172		0.711	0.99808	0.00192		0.767	1.01172	-0.01172		0.768	0.96014	0.03986		0.764	0.97195	0.02805
Experimental conditions are indicated for each dataset.										1.024	0.97462	0.02538		1.024	1.01172	-0.01172		1.023	0.974	0.026		1.023	0.98814	0.01186		1.023	0.99465	0.00535		0.948	1.01169	-0.01169		0.949	0.99993	7.25959e-05		1.024	0.99522	0.00478		1.024	0.97043	0.02957		1.019	0.99982	0.000179241
										1.28	0.96748	0.03252		1.28	0.99613	0.00387		1.279	0.98195	0.01805		1.28	0.96768	0.03232		1.281	0.99518	0.00482		1.183	1.00081	-0.00080659		1.184	0.99532	0.00468		1.279	0.99033	0.00967		1.28	0.97185	0.02815		1.274	0.99305	0.00695
										1.536	0.96665	0.03335		1.536	0.99258	0.00742		1.536	0.97605	0.02395		1.536	1.01172	-0.01172		1.536	0.99355	0.00645		1.42	1.01173	-0.01173		1.421	1.01173	-0.01173		1.536	1.01172	-0.01172		1.536	0.95698	0.04302		1.53	0.99372	0.00628
										1.793	0.97786	0.02214		1.792	0.98413	0.01587		1.792	0.97962	0.02038		1.792	0.98218	0.01782		1.793	0.99348	0.00652		1.657	1.01173	-0.01173		1.659	1.01172	-0.01172		1.791	0.99088	0.00912		1.792	0.93862	0.06138		1.784	0.98775	0.01225
										2.049	0.97117	0.02883		2.048	0.98966	0.01034		2.048	0.97674	0.02326		2.047	0.99096	0.00904		2.048	0.99291	0.00709		1.894	0.97323	0.02677		1.896	0.99607	0.00393		2.047	0.90122	0.09878		2.048	0.96136	0.03864		2.04	0.98736	0.01264
										2.304	0.96147	0.03853		2.304	0.98045	0.01955		2.304	0.9779	0.0221		2.304	0.96477	0.03523		2.305	0.99451	0.00549		2.131	0.99965	0.000351153		2.132	1.00155	-0.00155		2.304	0.98105	0.01895		2.304	0.95174	0.04826		2.295	0.97775	0.02225
										2.561	0.96031	0.03969		2.56	0.98848	0.01152		2.561	0.97185	0.02815		2.56	0.93663	0.06337		2.56	0.99426	0.00574		2.368	1.00063	-0.00063161		2.37	1.00192	-0.00192		2.56	0.98548	0.01452		2.56	0.96278	0.03722		2.549	0.97908	0.02092
										2.817	0.96738	0.03262		2.816	0.9909	0.0091		2.816	0.97418	0.02582		2.816	0.99499	0.00501		2.817	0.99284	0.00716		2.605	0.99689	0.00311		2.607	1.00416	-0.00416		2.816	0.98658	0.01342		2.817	0.96107	0.03893		2.805	0.98216	0.01784
										3.072	0.96523	0.03477		3.072	0.96042	0.03958		3.072	0.96371	0.03629		3.072	0.98187	0.01813		3.073	0.99329	0.00671		2.841	0.99828	0.00172		2.843	0.99126	0.00874		3.072	0.97636	0.02364		3.073	0.95683	0.04317		3.06	0.97939	0.02061
										3.329	0.95684	0.04316		3.327	0.99206	0.00794		3.328	0.97881	0.02119		3.328	0.94626	0.05374		3.328	0.99246	0.00754		3.078	1.00133	-0.00133		3.08	0.99658	0.00342		3.329	0.98407	0.01593		3.329	0.95142	0.04858		3.314	0.9748	0.0252
										3.585	0.90779	0.09221		3.584	0.98351	0.01649		3.585	0.96997	0.03003		3.584	0.97092	0.02908		3.585	0.99338	0.00662		3.316	0.9862	0.0138		3.316	0.9984	0.0016		3.585	0.98896	0.01104		3.585	0.95142	0.04858		3.569	1.01172	-0.01172
										3.841	0.94848	0.05152		3.84	0.9835	0.0165		3.84	0.97435	0.02565		3.841	0.96444	0.03556		3.84	0.99407	0.00593		3.553	1.01173	-0.01173		3.554	0.989	0.011		3.84	0.9881	0.0119		3.841	0.94525	0.05475		3.824	0.97673	0.02327
										4.097	0.96938	0.03062		4.096	0.99068	0.00932		4.096	0.97315	0.02685		4.096	0.9549	0.0451		4.096	0.99019	0.00981		3.789	1.01173	-0.01173		3.791	0.99421	0.00579		4.097	0.97114	0.02886		4.096	0.95724	0.04276		4.08	0.97244	0.02756
										4.353	0.95495	0.04505		4.352	0.97273	0.02727		4.353	0.97455	0.02545		4.353	0.95083	0.04917		4.353	0.98985	0.01015		4.025	0.99051	0.00949		4.028	1.01172	-0.01172		4.353	0.98279	0.01721		4.352	0.95697	0.04303		4.335	0.95497	0.04503
										4.61	0.95092	0.04908		4.608	0.97871	0.02129		4.609	0.97383	0.02617		4.609	0.98732	0.01268		4.608	0.99212	0.00788		4.263	1.01173	-0.01173		4.265	0.99743	0.00257		4.609	0.98332	0.01668		4.608	0.94995	0.05005		4.59	0.97193	0.02807
										4.865	0.95946	0.04054		4.864	0.98008	0.01992		4.865	0.96338	0.03662		4.864	0.96361	0.03639		4.865	0.98845	0.01155		4.5	0.99384	0.00616		4.501	0.99511	0.00489		4.864	0.98408	0.01592		4.865	0.94422	0.05578		4.845	0.9662	0.0338
										5.121	0.95441	0.04559		5.12	0.97346	0.02654		5.121	0.92382	0.07618		5.12	0.98815	0.01185		5.121	0.99216	0.00784		4.736	0.99474	0.00526		4.738	0.9967	0.0033		5.12	0.98523	0.01477		5.121	0.94718	0.05282		5.099	0.96855	0.03145
										5.377	0.94863	0.05137		5.376	0.96605	0.03395		5.377	0.96748	0.03252		5.377	0.9795	0.0205		5.377	0.98808	0.01192		4.973	0.99434	0.00566		4.975	0.98625	0.01375		5.377	0.97741	0.02259		5.377	0.93776	0.06224		5.355	0.96686	0.03314
										5.633	0.95876	0.04124		5.632	0.97619	0.02381		5.632	0.97202	0.02798		5.632	1.01172	-0.01172		5.633	0.98786	0.01214		5.21	0.99704	0.00296		5.211	1.01173	-0.01173		5.633	0.97494	0.02506		5.633	0.92849	0.07151		5.61	0.96677	0.03323
										5.89	0.95283	0.04717		5.889	0.98006	0.01994		5.888	0.97113	0.02887		5.888	0.95115	0.04885		5.89	0.98415	0.01585		5.447	1.01174	-0.01174		5.449	0.99389	0.00611		5.889	0.98093	0.01907		5.889	0.93954	0.06046		5.866	0.96248	0.03752
										6.146	0.93793	0.06207		6.144	0.96805	0.03195		6.145	0.97026	0.02974		6.144	0.9814	0.0186		6.145	0.98739	0.01261		5.684	0.99612	0.00388		5.686	0.99187	0.00813		6.145	0.99687	0.00313		6.146	0.93492	0.06508		6.121	0.95815	0.04185
										6.401	0.96885	0.03115		6.401	1.01172	-0.01172		6.4	0.96823	0.03177		6.4	1.01172	-0.01172		6.401	0.98923	0.01077		5.92	1.01172	-0.01172		5.923	1.00046	-0.000464332		6.401	0.97784	0.02216		6.401	0.92674	0.07326		6.376	0.96159	0.03841
										6.658	0.92882	0.07118		6.656	0.9831	0.0169		6.657	0.96437	0.03563		6.657	0.97846	0.02154		6.658	0.98871	0.01129		6.158	1.01172	-0.01172		6.159	0.99694	0.00306		6.656	0.96901	0.03099		6.658	0.94662	0.05338		6.631	0.9642	0.0358
										6.913	0.94862	0.05138		6.913	0.96623	0.03377		6.914	0.97078	0.02922		6.913	1.01172	-0.01172		6.913	0.98739	0.01261		6.394	0.98765	0.01235		6.396	1.0117	-0.0117		6.913	0.97728	0.02272		6.913	0.9352	0.0648		6.885	0.95564	0.04436
										7.17	0.94437	0.05563		7.168	0.97662	0.02338		7.169	0.96325	0.03675		7.169	1.00481	-0.00481		7.17	0.98598	0.01402		6.631	0.99859	0.00141		6.633	0.99957	0.000425018		7.169	0.97101	0.02899		7.17	0.91922	0.08078		7.141	0.95374	0.04626
										7.425	0.94299	0.05701		7.424	0.97413	0.02587		7.425	0.96289	0.03711		7.425	0.98571	0.01429		7.425	0.98811	0.01189		6.868	0.98237	0.01763		6.869	0.99359	0.00641		7.425	0.97278	0.02722		7.425	0.93512	0.06488		7.396	0.95922	0.04078
										7.682	0.93994	0.06006		7.681	0.96984	0.03016		7.681	0.96142	0.03858		7.681	0.99204	0.00796		7.681	0.99006	0.00994		7.106	0.99287	0.00713		7.106	1.01171	-0.01171		7.681	0.96816	0.03184		7.682	0.93097	0.06903		7.651	0.95	0.05
										7.938	0.94332	0.05668		7.937	0.97232	0.02768		7.937	0.96282	0.03718		7.937	0.96485	0.03515		7.937	0.98843	0.01157		7.342	0.9948	0.0052		7.343	1.0117	-0.0117		7.937	0.961	0.039		7.938	0.93385	0.06615		7.905	0.95213	0.04787
										8.194	0.94282	0.05718		8.193	0.96487	0.03513		8.193	0.9656	0.0344		8.193	0.95212	0.04788		8.193	0.98912	0.01088		7.578	0.99196	0.00804		7.58	0.99202	0.00798		8.193	0.96408	0.03592		8.193	0.92439	0.07561		8.161	0.95568	0.04432
										8.449	0.93881	0.06119		8.449	0.97028	0.02972		8.449	0.96767	0.03233		8.449	0.97819	0.02181		8.45	0.98854	0.01146		7.816	0.99689	0.00311		7.817	0.99131	0.00869		8.449	0.96385	0.03615		8.449	0.92594	0.07406		8.415	0.94614	0.05386
										8.706	0.94213	0.05787		8.705	0.97458	0.02542		8.706	0.96455	0.03545		8.705	0.98796	0.01204		8.705	0.98558	0.01442		8.052	0.99245	0.00755		8.054	0.99914	0.000855323		8.705	0.95565	0.04435		8.705	0.94812	0.05188		8.671	0.94477	0.05523
										8.962	0.92672	0.07328		8.96	0.97545	0.02455		8.961	0.96864	0.03136		8.961	0.96656	0.03344		8.961	0.98486	0.01514		8.289	0.9935	0.0065		8.291	0.99097	0.00903		8.961	0.96071	0.03929		8.961	0.93043	0.06957		8.926	0.94938	0.05062
										9.218	0.94711	0.05289		9.216	0.98096	0.01904		9.217	0.96658	0.03342		9.218	0.98293	0.01707		9.217	0.9884	0.0116		8.527	0.99105	0.00895		8.528	1.00384	-0.00384		9.218	1.01172	-0.01172		9.218	0.92417	0.07583		9.181	0.94384	0.05616
										9.473	0.9358	0.0642		9.472	0.96142	0.03858		9.474	0.96222	0.03778		9.474	0.97858	0.02142		9.473	0.98643	0.01357		8.763	0.99589	0.00411		8.764	0.99862	0.00138		9.473	0.96251	0.03749		9.474	0.93212	0.06788		9.435	0.94965	0.05035
										9.73	0.93574	0.06426		9.73	0.97467	0.02533		9.73	0.96654	0.03346		9.729	0.95654	0.04346		9.729	0.9873	0.0127		9	1.01172	-0.01172		9.002	0.98868	0.01132		9.73	1.01172	-0.01172		9.73	0.92491	0.07509		9.691	0.9458	0.0542
										9.986	0.92278	0.07722		9.985	0.96929	0.03071		9.985	0.97534	0.02466		9.985	1.0016	-0.0016		9.986	0.98643	0.01357		9.236	0.99643	0.00357		9.238	1.00196	-0.00196		9.986	0.91582	0.08418		9.985	0.9129	0.0871		9.946	0.94958	0.05042
										10.243	0.92199	0.07801		10.242	0.95176	0.04824		10.241	0.96509	0.03491		10.241	0.92699	0.07301		10.241	0.98465	0.01535		9.473	0.99131	0.00869		9.475	0.99094	0.00906		10.241	0.92392	0.07608		10.242	0.92139	0.07861		10.201	0.94815	0.05185
										10.5	0.93783	0.06217		10.497	0.97285	0.02715		10.497	0.9515	0.0485		10.497	0.97856	0.02144		10.498	0.98606	0.01394		9.71	0.99429	0.00571		9.711	0.98917	0.01083		10.498	0.95313	0.04687		10.498	0.94006	0.05994		10.456	0.94382	0.05618
										10.755	0.91689	0.08311		10.754	0.95697	0.04303		10.753	0.95885	0.04115		10.754	0.95392	0.04608		10.753	0.98705	0.01295		9.947	0.99224	0.00776		9.949	0.98576	0.01424		10.754	0.87793	0.12207		10.754	0.91859	0.08141		10.711	0.90536	0.09464
										11.011	0.91402	0.08598		11.009	0.9727	0.0273		11.01	0.95733	0.04267		11.01	0.96276	0.03724		11.01	0.98729	0.01271		10.183	0.99283	0.00717		10.186	0.9883	0.0117		11.01	0.94939	0.05061		11.01	0.92036	0.07964		10.967	0.91592	0.08408
										11.268	0.91718	0.08282		11.265	0.96049	0.03951		11.266	0.96374	0.03626		11.266	0.86161	0.13839		11.266	0.98585	0.01415		10.42	0.99378	0.00622		10.423	0.99138	0.00862		11.266	1.01172	-0.01172		11.266	0.92356	0.07644		11.221	0.94154	0.05846
										11.524	0.97691	0.02309		11.522	0.96552	0.03448		11.522	0.95467	0.04533		11.521	0.97604	0.02396		11.522	0.98626	0.01374		10.657	0.99692	0.00308		10.658	0.99713	0.00287		11.522	0.95036	0.04964		11.522	0.91674	0.08326		11.477	0.9325	0.0675
										11.78	0.92699	0.07301		11.777	0.95764	0.04236		11.778	0.9584	0.0416		11.778	0.94737	0.05263		11.778	0.98467	0.01533		10.894	0.9904	0.0096		10.896	0.98838	0.01162		11.778	0.96928	0.03072		11.778	0.90789	0.09211		11.731	0.93774	0.06226
										12.035	0.91215	0.08785		12.033	0.96057	0.03943		12.033	0.96243	0.03757		12.034	0.97242	0.02758		12.034	0.98641	0.01359		11.131	0.999	0.000995084		11.133	0.99341	0.00659		12.034	0.9704	0.0296		12.035	0.91391	0.08609		11.986	0.94279	0.05721
										12.292	0.92743	0.07257		12.289	0.95274	0.04726		12.29	0.96655	0.03345		12.29	0.92498	0.07502		12.29	0.98667	0.01333		11.368	0.99403	0.00597		11.37	0.99428	0.00572		12.29	0.94751	0.05249		12.29	0.91274	0.08726		12.241	0.93973	0.06027
										12.547	0.93684	0.06316		12.546	0.96234	0.03766		12.546	0.96466	0.03534		12.546	0.98132	0.01868		12.546	0.98302	0.01698		11.605	0.99795	0.00205		11.606	0.99333	0.00667		12.546	0.94662	0.05338		12.546	0.88871	0.11129		12.497	0.94259	0.05741
										12.803	0.91666	0.08334		12.802	0.94636	0.05364		12.802	0.95646	0.04354		12.802	0.99946	0.000540246		12.802	0.98113	0.01887		11.842	0.99589	0.00411		11.843	0.98523	0.01477		12.802	0.94641	0.05359		12.803	0.91792	0.08208		12.752	0.9427	0.0573
										13.061	0.91361	0.08639		13.058	0.94804	0.05196		13.059	0.96088	0.03912		13.058	0.96662	0.03338		13.058	0.98451	0.01549		12.078	0.9888	0.0112		12.08	0.99383	0.00617		13.059	0.94379	0.05621		13.058	0.90054	0.09946		13.006	0.93806	0.06194
										13.316	0.90381	0.09619		13.314	0.95077	0.04923		13.314	0.94538	0.05462		13.314	1.01172	-0.01172		13.315	0.97934	0.02066		12.315	0.98931	0.01069		12.316	0.99522	0.00478		13.314	0.91889	0.08111		13.315	0.90298	0.09702		13.261	0.93427	0.06573
										13.572	0.91618	0.08382		13.57	0.95576	0.04424		13.57	0.95237	0.04763		13.571	0.96052	0.03948		13.571	0.98028	0.01972		12.552	0.99194	0.00806		12.555	0.98721	0.01279		13.571	0.93423	0.06577		13.57	0.90965	0.09035		13.517	0.92127	0.07873
										13.828	0.91735	0.08265		13.826	0.9515	0.0485		13.826	0.95428	0.04572		13.826	0.97535	0.02465		13.826	0.98163	0.01837		12.789	0.99027	0.00973		12.791	0.99041	0.00959		13.826	0.93599	0.06401		13.826	0.90588	0.09412		13.772	0.9324	0.0676
										14.085	0.91874	0.08126		14.082	0.96135	0.03865		14.082	0.95712	0.04288		14.082	0.97274	0.02726		14.083	0.98553	0.01447		13.026	0.98713	0.01287		13.027	0.98861	0.01139		14.082	0.94944	0.05056		14.083	0.91286	0.08714		14.027	0.92994	0.07006
										14.34	0.90518	0.09482		14.338	0.94955	0.05045		14.339	0.95562	0.04438		14.34	0.97245	0.02755		14.338	0.97842	0.02158		13.262	0.98774	0.01226		13.265	0.99677	0.00323		14.339	0.928	0.072		14.339	0.91343	0.08657		14.281	0.90677	0.09323
										14.597	0.91097	0.08903		14.594	0.95982	0.04018		14.595	0.95657	0.04343		14.595	0.95989	0.04011		14.595	0.98203	0.01797		13.499	0.99791	0.00209		13.502	0.96594	0.03406		14.595	0.85528	0.14472		14.595	0.88486	0.11514		14.537	0.92504	0.07496
										14.853	0.90514	0.09486		14.85	0.95332	0.04668		14.851	0.95857	0.04143		14.852	0.99492	0.00508		14.851	0.97757	0.02243		13.736	0.98757	0.01243		13.738	0.99474	0.00526		14.851	0.93968	0.06032		14.851	0.90851	0.09149		14.792	0.90544	0.09456
										15.108	0.90604	0.09396		15.106	0.9575	0.0425		15.106	0.95397	0.04603		15.107	1.01172	-0.01172		15.106	0.97826	0.02174		13.973	0.99212	0.00788		13.975	0.98982	0.01018		15.107	0.94	0.06		15.107	0.9035	0.0965		15.046	0.93013	0.06987
										15.365	0.90628	0.09372		15.362	0.94578	0.05422		15.362	0.95103	0.04897		15.363	0.97213	0.02787		15.362	0.98406	0.01594		14.21	1.01171	-0.01171		14.212	0.98392	0.01608		15.363	0.93267	0.06733		15.363	0.90729	0.09271		15.303	0.93349	0.06651
										15.621	0.9099	0.0901		15.618	0.93514	0.06486		15.619	0.95952	0.04048		15.619	0.96468	0.03532		15.619	0.98099	0.01901		14.448	0.98806	0.01194		14.45	0.99068	0.00932		15.619	0.93214	0.06786		15.619	0.90342	0.09658		15.557	0.93288	0.06712
										15.877	0.90383	0.09617		15.874	0.91472	0.08528		15.875	0.9557	0.0443		15.876	0.91686	0.08314		15.875	0.98291	0.01709		14.684	0.98964	0.01036		14.685	0.99875	0.00125		15.875	0.93864	0.06136		15.875	0.88439	0.11561		15.812	0.9313	0.0687
										16.133	0.90627	0.09373		16.13	0.93456	0.06544		16.131	0.95387	0.04613		16.132	0.97193	0.02807		16.132	0.97983	0.02017		14.92	1.01172	-0.01172		14.922	0.99045	0.00955		16.13	0.9166	0.0834		16.131	0.90626	0.09374		16.067	0.92402	0.07598
										16.39	0.90158	0.09842		16.386	0.94882	0.05118		16.386	0.94792	0.05208		16.388	0.96826	0.03174		16.387	0.98122	0.01878		15.158	0.99486	0.00514		15.159	0.99011	0.00989		16.386	0.91378	0.08622		16.387	0.91038	0.08962		16.323	0.92564	0.07436
										16.646	0.91322	0.08678		16.642	0.95045	0.04955		16.642	0.94911	0.05089		16.643	0.96348	0.03652		16.643	0.9795	0.0205		15.395	0.99098	0.00902		15.395	0.99024	0.00976		16.642	0.93069	0.06931		16.643	0.88795	0.11205		16.577	0.92441	0.07559
										16.901	0.9158	0.0842		16.899	0.94595	0.05405		16.898	0.95292	0.04708		16.9	0.97325	0.02675		16.899	0.98068	0.01932		15.631	0.9907	0.0093		15.633	0.99969	0.000305156		16.899	0.90771	0.09229		16.899	0.90144	0.09856		16.833	0.92889	0.07111
										17.157	0.91434	0.08566		17.154	0.94956	0.05044		17.154	0.9531	0.0469		17.156	0.96021	0.03979		17.155	0.98175	0.01825		15.867	0.9886	0.0114		15.869	0.99488	0.00512		17.155	0.92965	0.07035		17.155	0.90177	0.09823		17.088	0.92031	0.07969
										17.413	0.9175	0.0825		17.41	0.94899	0.05101		17.411	0.95147	0.04853		17.411	0.98814	0.01186		17.411	0.98092	0.01908		16.105	0.99633	0.00367		16.107	0.98428	0.01572		17.411	0.92249	0.07751		17.411	0.89403	0.10597		17.343	0.9162	0.0838
										17.669	0.88584	0.11416		17.666	0.94787	0.05213		17.667	0.94731	0.05269		17.667	0.96925	0.03075		17.667	0.98167	0.01833		16.341	0.99358	0.00642		16.343	0.98177	0.01823		17.667	0.9096	0.0904		17.667	0.89305	0.10695		17.598	0.9234	0.0766
										17.926	0.89473	0.10527		17.923	0.94853	0.05147		17.922	0.94566	0.05434		17.924	0.94462	0.05538		17.923	0.97944	0.02056		16.579	0.98744	0.01256		16.58	0.99667	0.00333		17.923	0.91884	0.08116		17.923	0.87791	0.12209		17.853	0.9213	0.0787
										18.181	0.89202	0.10798		18.179	0.94839	0.05161		18.179	0.94545	0.05455		18.18	0.97106	0.02894		18.179	0.97987	0.02013		16.815	0.99522	0.00478		16.817	0.99322	0.00678		18.179	0.91669	0.08331		18.18	0.88919	0.11081		18.108	0.92197	0.07803
										18.438	0.89677	0.10323		18.435	0.94972	0.05028		18.435	1.01172	-0.01172		18.436	0.96959	0.03041		18.435	0.98001	0.01999		17.052	0.98996	0.01004		17.054	0.9943	0.0057		18.435	0.93207	0.06793		18.435	0.87201	0.12799		18.363	0.91517	0.08483
										18.693	0.90406	0.09594		18.69	0.94502	0.05498		18.691	0.95011	0.04989		18.692	0.96841	0.03159		18.691	0.98006	0.01994		17.289	0.98928	0.01072		17.291	0.99403	0.00597		18.691	0.9267	0.0733		18.691	0.87865	0.12135		18.617	0.91167	0.08833
										18.95	0.90369	0.09631		18.947	0.94569	0.05431		18.947	0.94448	0.05552		18.948	0.93971	0.06029		18.948	0.97949	0.02051		17.527	0.98737	0.01263		17.527	0.99418	0.00582		18.948	0.91828	0.08172		18.947	0.87675	0.12325		18.873	0.91913	0.08087
										19.206	0.89623	0.10377		19.203	0.93799	0.06201		19.203	0.94945	0.05055		19.204	1.01172	-0.01172		19.204	0.98015	0.01985		17.763	0.99104	0.00896		17.764	0.99151	0.00849		19.203	0.90208	0.09792		19.204	0.85918	0.14082		19.128	0.92342	0.07658
										19.462	0.90707	0.09293		19.459	0.94192	0.05808		19.459	0.94627	0.05373		19.46	0.97975	0.02025		19.459	0.97764	0.02236		18	0.98505	0.01495		18.001	0.99513	0.00487		19.459	0.9086	0.0914		19.459	0.88984	0.11016		19.383	0.91114	0.08886
										19.718	0.89175	0.10825		19.715	0.94331	0.05669		19.716	0.94833	0.05167		19.716	0.90206	0.09794		19.716	0.9794	0.0206		18.236	0.99182	0.00818		18.238	0.9854	0.0146		19.715	0.90525	0.09475		19.715	0.89247	0.10753		19.638	0.90599	0.09401
										19.974	0.89789	0.10211		19.971	0.94312	0.05688		19.971	0.94443	0.05557		19.972	0.98365	0.01635		19.972	0.9791	0.0209		18.473	0.99025	0.00975		18.476	1.01169	-0.01169		19.971	0.91413	0.08587		19.971	0.87063	0.12937		19.892	0.91799	0.08201
										20.23	0.89598	0.10402		20.227	0.94324	0.05676		20.227	0.94327	0.05673		20.228	0.96122	0.03878		20.228	0.97801	0.02199		18.711	0.99183	0.00817		18.712	0.96243	0.03757		20.227	0.91448	0.08552		20.228	0.87966	0.12034		20.148	0.91368	0.08632
										20.486	0.92955	0.07045		20.483	0.93993	0.06007		20.484	0.94763	0.05237		20.484	0.9383	0.0617		20.483	0.97826	0.02174		18.948	0.9921	0.0079		18.948	0.99304	0.00696		20.484	0.92162	0.07838		20.484	0.89955	0.10045		20.402	0.90009	0.09991
										20.742	0.91817	0.08183		20.739	0.93948	0.06052		20.739	0.94002	0.05998		20.741	0.92858	0.07142		20.739	0.97794	0.02206		19.185	0.99167	0.00833		19.186	0.98707	0.01293		20.74	0.91408	0.08592		20.74	0.87792	0.12208		20.658	0.90084	0.09916
										20.998	0.882	0.118		20.995	0.94091	0.05909		20.996	0.94681	0.05319		20.997	0.91547	0.08453		20.995	0.97616	0.02384		19.42	0.98824	0.01176		19.423	1.01171	-0.01171		20.996	0.88947	0.11053		20.996	0.88374	0.11626		20.913	0.90896	0.09104
										21.254	0.88047	0.11953		21.252	0.93491	0.06509		21.251	0.94864	0.05136		21.253	0.94407	0.05593		21.252	0.97607	0.02393		19.658	0.99046	0.00954		19.66	0.9946	0.0054		21.251	0.80732	0.19268		21.252	0.87912	0.12088		21.167	0.90599	0.09401
										21.511	0.89429	0.10571		21.507	0.94136	0.05864		21.508	0.946	0.054		21.509	0.96333	0.03667		21.508	0.97261	0.02739		19.894	1.01172	-0.01172		19.897	0.99305	0.00695		21.508	0.89943	0.10057		21.508	0.86351	0.13649		21.423	0.89751	0.10249
										21.766	0.87566	0.12434		21.763	0.93734	0.06266		21.764	0.93677	0.06323		21.765	0.93223	0.06777		21.764	0.97579	0.02421		20.131	0.98601	0.01399		20.133	0.99769	0.00231		21.763	0.88629	0.11371		21.764	0.8742	0.1258		21.679	0.89954	0.10046
										22.022	0.88365	0.11635		22.02	0.93777	0.06223		22.02	0.93754	0.06246		22.021	0.96175	0.03825		22.02	0.97524	0.02476		20.368	0.99828	0.00172		20.369	0.99172	0.00828		22.02	0.90228	0.09772		22.02	0.88448	0.11552		21.933	0.9067	0.0933
										22.278	0.87388	0.12612		22.275	0.93766	0.06234		22.277	0.94698	0.05302		22.276	0.92211	0.07789		22.276	0.9761	0.0239		20.604	0.98792	0.01208		20.607	0.98945	0.01055		22.276	0.91818	0.08182		22.276	0.88753	0.11247		22.189	0.89212	0.10788
										22.535	0.87303	0.12697		22.532	0.9326	0.0674		22.532	0.9359	0.0641		22.533	0.98415	0.01585		22.533	0.97652	0.02348		20.842	0.98716	0.01284		20.843	0.99226	0.00774		22.532	0.89931	0.10069		22.532	0.87568	0.12432		22.443	0.89232	0.10768
										22.79	0.89651	0.10349		22.788	0.92593	0.07407		22.789	0.94341	0.05659		22.789	0.98446	0.01554		22.788	0.97536	0.02464		21.079	0.97331	0.02669		21.08	0.9954	0.0046		22.788	0.9053	0.0947		22.788	0.88437	0.11563		22.699	0.90048	0.09952
										23.046	0.88466	0.11534		23.044	0.92396	0.07604		23.045	0.94097	0.05903		23.045	0.92898	0.07102		23.044	0.97565	0.02435		21.316	0.99853	0.00147		21.316	0.98759	0.01241		23.044	0.90176	0.09824		23.045	0.86734	0.13266		22.953	0.9083	0.0917
										23.303	0.88849	0.11151		23.299	0.93276	0.06724		23.302	0.92267	0.07733		23.3	0.97124	0.02876		23.301	0.97503	0.02497		21.553	0.98887	0.01113		21.554	0.99476	0.00524		23.3	0.89879	0.10121		23.301	0.87584	0.12416		23.209	0.90505	0.09495
										23.559	0.86814	0.13186		23.556	0.9259	0.0741		23.557	0.93571	0.06429		23.557	1.01172	-0.01172		23.556	0.97675	0.02325		21.789	0.99184	0.00816		21.791	0.98728	0.01272		23.557	0.89913	0.10087		23.556	0.87441	0.12559		23.464	0.90014	0.09986
										23.814	0.87492	0.12508		23.812	0.93367	0.06633		23.813	0.94463	0.05537		23.813	0.98962	0.01038		23.813	0.97856	0.02144		22.026	0.98765	0.01235		22.028	0.98813	0.01187		23.812	0.89304	0.10696		23.812	0.87302	0.12698		23.718	0.90249	0.09751
										24.07	0.8685	0.1315		24.068	0.92766	0.07234		24.069	0.94553	0.05447		24.07	0.96355	0.03645		24.069	0.97587	0.02413		22.263	0.99432	0.00568		22.264	0.98216	0.01784		24.068	0.88773	0.11227		24.068	0.75376	0.24624		23.974	0.91069	0.08931
										24.326	0.87652	0.12348		24.323	0.92234	0.07766		24.325	0.94562	0.05438		24.325	0.96012	0.03988		24.325	0.97547	0.02453		22.5	0.99497	0.00503		22.501	0.97085	0.02915		24.324	0.89875	0.10125		24.324	0.87885	0.12115		24.228	0.88656	0.11344
										24.582	0.8364	0.1636		24.579	0.92859	0.07141		24.581	0.93538	0.06462		24.581	0.98596	0.01404		24.581	0.97684	0.02316		22.737	0.99557	0.00443		22.738	0.98848	0.01152		24.58	0.87715	0.12285		24.581	0.86346	0.13654		24.483	0.90436	0.09564
										24.839	0.87413	0.12587		24.836	0.92146	0.07854		24.837	0.94499	0.05501		24.837	0.97296	0.02704		24.837	0.9772	0.0228		22.973	0.96377	0.03623		22.975	0.99622	0.00378		24.837	0.8857	0.1143		24.837	0.87328	0.12672		24.739	0.89671	0.10329
										25.095	0.86891	0.13109		25.092	0.92719	0.07281		25.093	0.9328	0.0672		25.093	0.98266	0.01734		25.094	0.97628	0.02372		23.21	0.98224	0.01776		23.212	0.99228	0.00772		25.092	0.90064	0.09936		25.093	0.85884	0.14116		24.993	0.90467	0.09533
										25.352	0.87153	0.12847		25.349	0.91961	0.08039		25.349	0.93475	0.06525		25.349	0.97337	0.02663		25.349	0.9737	0.0263		23.448	0.98365	0.01635		23.449	0.993	0.007		25.348	0.87541	0.12459		25.349	0.86016	0.13984		25.249	0.89654	0.10346
										25.608	0.87571	0.12429		25.603	0.92357	0.07643		25.605	0.93022	0.06978		25.605	0.95936	0.04064		25.606	0.97436	0.02564		23.684	0.98095	0.01905		23.687	0.99002	0.00998		25.604	0.873	0.127		25.605	0.8559	0.1441		25.503	0.88586	0.11414
										25.864	0.87034	0.12966		25.859	0.9173	0.0827		25.862	0.92793	0.07207		25.861	0.87253	0.12747		25.862	0.97339	0.02661		23.921	0.9884	0.0116		23.923	0.9882	0.0118		25.861	0.88985	0.11015		25.861	0.85718	0.14282		25.759	0.88981	0.11019
										26.12	0.87404	0.12596		26.116	0.91608	0.08392		26.118	0.93304	0.06696		26.117	0.95174	0.04826		26.117	0.97424	0.02576		24.158	0.98275	0.01725		24.159	0.98159	0.01841		26.117	0.8744	0.1256		26.117	0.86267	0.13733		26.014	0.86097	0.13903
										26.376	0.85957	0.14043		26.372	0.90566	0.09434		26.373	0.94035	0.05965		26.374	1.01172	-0.01172		26.374	0.97376	0.02624		24.395	0.98931	0.01069		24.396	1.01174	-0.01174		26.372	0.88321	0.11679		26.372	0.85674	0.14326		26.269	0.88249	0.11751
										26.632	0.86727	0.13273		26.628	0.91732	0.08268		26.63	0.93721	0.06279		26.629	0.90359	0.09641		26.63	0.97204	0.02796		24.631	0.99726	0.00274		24.633	0.98889	0.01111		26.629	0.90568	0.09432		26.629	0.86871	0.13129		26.524	0.88548	0.11452
										26.888	0.8781	0.1219		26.884	0.91406	0.08594		26.886	0.93318	0.06682		26.885	0.93279	0.06721		26.885	0.9751	0.0249		24.868	0.97822	0.02178		24.87	0.99114	0.00886		26.885	0.88317	0.11683		26.885	0.87101	0.12899		26.779	0.89004	0.10996
										27.144	0.84132	0.15868		27.141	0.89497	0.10503		27.142	0.93586	0.06414		27.141	0.98349	0.01651		27.142	0.973	0.027		25.105	0.98867	0.01133		25.106	0.98889	0.01111		27.141	0.87361	0.12639		27.141	0.85396	0.14604		27.035	0.88941	0.11059
										27.4	0.8576	0.1424		27.397	0.894	0.106		27.398	0.94061	0.05939		27.397	0.92484	0.07516		27.398	0.97306	0.02694		25.341	0.98715	0.01285		25.343	0.99264	0.00736		27.396	0.88367	0.11633		27.397	0.84136	0.15864		27.29	0.89023	0.10977
										27.656	0.84864	0.15136		27.652	0.89494	0.10506		27.654	0.93725	0.06275		27.654	0.90633	0.09367		27.655	0.97116	0.02884		25.579	0.98886	0.01114		25.58	1.01173	-0.01173		27.654	0.87959	0.12041		27.654	0.85121	0.14879		27.545	0.89537	0.10463
										27.912	0.85857	0.14143		27.908	0.91345	0.08655		27.91	0.9386	0.0614		27.91	0.97358	0.02642		27.91	0.97468	0.02532		25.815	0.97714	0.02286		25.818	0.97993	0.02007		27.908	0.90079	0.09921		27.909	0.85704	0.14296		27.799	0.89888	0.10112
										28.168	0.85465	0.14535		28.165	0.89599	0.10401		28.166	0.93694	0.06306		28.165	0.95576	0.04424		28.166	0.9735	0.0265		26.053	0.98941	0.01059		26.055	0.9843	0.0157		28.164	0.94631	0.05369		28.165	0.84732	0.15268		28.054	0.88437	0.11563
										28.424	0.87541	0.12459		28.42	0.89295	0.10705		28.422	0.92059	0.07941		28.421	0.98285	0.01715		28.422	0.96894	0.03106		26.289	0.99171	0.00829		26.29	0.98581	0.01419		28.422	0.85773	0.14227		28.421	0.85722	0.14278		28.31	0.89833	0.10167
										28.681	0.87402	0.12598		28.677	0.8783	0.1217		28.679	0.92187	0.07813		28.677	0.87926	0.12074		28.678	0.97226	0.02774		26.526	0.99024	0.00976		26.528	0.99702	0.00298		28.677	0.85785	0.14215		28.677	0.86125	0.13875		28.564	0.8031	0.1969
										28.937	0.85485	0.14515		28.933	0.9671	0.0329		28.934	0.96829	0.03171		28.934	0.95186	0.04814		28.934	0.9675	0.0325		26.763	0.99198	0.00802		26.765	0.9887	0.0113		28.933	0.86029	0.13971		28.933	0.85909	0.14091		28.82	0.88874	0.11126
										29.192	0.83915	0.16085		29.189	0.88147	0.11853		29.19	0.92021	0.07979		29.19	0.93962	0.06038		29.19	0.97246	0.02754		27	0.98934	0.01066		27.002	0.98935	0.01065		29.189	0.91146	0.08854		29.19	0.83225	0.16775		29.074	0.88748	0.11252
										29.449	0.86131	0.13869		29.445	0.88105	0.11895		29.446	0.93541	0.06459		29.446	0.93718	0.06282		29.447	0.97024	0.02976		27.236	1.01172	-0.01172		27.238	0.99261	0.00739		29.445	0.86946	0.13054		29.445	0.86729	0.13271		29.329	0.86772	0.13228
										29.704	0.87443	0.12557		29.701	0.9072	0.0928		29.702	0.92864	0.07136		29.702	1.01172	-0.01172		29.702	0.97226	0.02774		27.474	0.9851	0.0149		27.475	0.98912	0.01088		29.701	0.87001	0.12999		29.702	0.83116	0.16884		29.584	0.88663	0.11337
										29.961	0.8391	0.1609		29.957	0.92064	0.07936		29.958	0.92851	0.07149		29.958	0.92095	0.07905		29.958	0.97189	0.02811		27.71	0.98801	0.01199		27.711	1.01171	-0.01171		29.957	0.86884	0.13116		29.957	0.82849	0.17151		29.839	0.87495	0.12505
										30.217	0.85746	0.14254		30.212	0.91068	0.08932		30.214	0.92393	0.07607		30.214	0.8482	0.1518		30.214	0.96933	0.03067		27.947	0.99101	0.00899		27.95	0.98332	0.01668		30.214	0.88137	0.11863		30.213	0.84196	0.15804		30.095	0.88815	0.11185
										30.473	0.86116	0.13884		30.468	0.91144	0.08856		30.47	0.91501	0.08499		30.47	0.9037	0.0963		30.47	0.97136	0.02864		28.184	0.99171	0.00829		28.187	0.9894	0.0106		30.47	0.85454	0.14546		30.47	0.85844	0.14156		30.35	0.886	0.114
										30.728	0.84555	0.15445		30.725	0.91234	0.08766		30.727	0.91711	0.08289		30.726	0.94973	0.05027		30.727	0.96919	0.03081		28.421	0.98912	0.01088		28.423	0.98591	0.01409		30.725	0.8721	0.1279		30.725	0.84765	0.15235		30.605	0.88558	0.11442
										30.985	0.83907	0.16093		30.981	0.91771	0.08229		30.983	0.9315	0.0685		30.983	0.90218	0.09782		30.983	0.97146	0.02854		28.658	0.99025	0.00975		28.658	0.99127	0.00873		30.982	0.86687	0.13313		30.982	0.84036	0.15964		30.86	0.86233	0.13767
										31.241	0.84227	0.15773		31.237	0.90875	0.09125		31.239	0.90871	0.09129		31.239	0.9345	0.0655		31.239	0.96916	0.03084		28.894	0.98818	0.01182		28.896	0.99272	0.00728		31.238	0.86339	0.13661		31.238	0.84144	0.15856		31.115	0.87298	0.12702
										31.497	0.85769	0.14231		31.494	0.90238	0.09762		31.495	0.93008	0.06992		31.494	1.01172	-0.01172		31.495	0.9683	0.0317		29.131	0.99629	0.00371		29.134	0.99454	0.00546		31.493	0.86003	0.13997		31.494	0.85655	0.14345		31.37	0.95367	0.04633
										31.753	0.86214	0.13786		31.749	0.91324	0.08676		31.751	0.92878	0.07122		31.75	0.93027	0.06973		31.751	0.9699	0.0301		29.369	0.98436	0.01564		29.371	0.99097	0.00903		31.749	0.86751	0.13249		31.75	0.8134	0.1866		31.625	0.86397	0.13603
										32.009	0.82759	0.17241		32.005	0.90891	0.09109		32.007	0.92536	0.07464		32.007	0.92808	0.07192		32.007	0.96703	0.03297		29.605	0.98246	0.01754		29.607	0.99362	0.00638		32.006	0.8644	0.1356		32.006	0.8609	0.1391		31.88	0.86996	0.13004
										32.265	0.81571	0.18429		32.261	0.9172	0.0828		32.263	0.91968	0.08032		32.262	0.88048	0.11952		32.262	0.96963	0.03037		29.842	0.99214	0.00786		29.843	0.98854	0.01146		32.262	0.86905	0.13095		32.262	0.82585	0.17415		32.135	0.8586	0.1414
										32.521	0.84758	0.15242		32.517	0.90212	0.09788		32.519	0.91844	0.08156		32.518	0.9498	0.0502		32.519	0.96861	0.03139		30.078	0.98423	0.01577		30.08	0.99783	0.00217		32.518	0.85777	0.14223		32.518	0.84566	0.15434		32.39	0.86919	0.13081
										32.778	0.85093	0.14907		32.774	0.89969	0.10031		32.775	0.92332	0.07668		32.775	0.95899	0.04101		32.775	0.97092	0.02908		30.315	0.98675	0.01325		30.317	0.98831	0.01169		32.774	0.87211	0.12789		32.774	0.8163	0.1837		32.645	0.8806	0.1194
										33.034	0.81874	0.18126		33.029	0.90948	0.09052		33.03	0.9218	0.0782		33.031	0.9409	0.0591		33.031	0.96811	0.03189		30.553	0.98781	0.01219		30.555	0.98662	0.01338		33.03	0.84725	0.15275		33.03	0.83001	0.16999		32.9	0.8819	0.1181
										33.289	0.83196	0.16804		33.285	0.90443	0.09557		33.287	0.9154	0.0846		33.286	0.94687	0.05313		33.287	0.96674	0.03326		30.79	0.99118	0.00882		30.791	0.9887	0.0113		33.286	0.83953	0.16047		33.287	0.8197	0.1803		33.155	0.87953	0.12047
										33.546	0.8282	0.1718		33.542	0.90296	0.09704		33.542	0.90579	0.09421		33.543	0.96282	0.03718		33.543	0.9668	0.0332		31.027	0.97948	0.02052		31.027	0.98244	0.01756		33.542	0.87403	0.12597		33.542	0.84747	0.15253		33.41	0.86818	0.13182
										33.801	0.84166	0.15834		33.797	0.89557	0.10443		33.799	0.92467	0.07533		33.798	0.94562	0.05438		33.8	0.96815	0.03185		31.263	0.98467	0.01533		31.265	0.99526	0.00474		33.798	0.86547	0.13453		33.798	0.83302	0.16698		33.666	0.87077	0.12923
										34.058	0.85448	0.14552		34.053	0.90348	0.09652		34.056	0.92392	0.07608		34.056	0.93804	0.06196		34.055	0.96973	0.03027		31.5	0.98805	0.01195		31.502	0.98814	0.01186		34.054	0.83896	0.16104		34.055	0.83452	0.16548		33.92	0.84236	0.15764
										34.313	0.85862	0.14138		34.31	0.90506	0.09494		34.312	0.92038	0.07962		34.31	0.9117	0.0883		34.311	0.96866	0.03134		31.737	0.95353	0.04647		31.738	0.98907	0.01093		34.31	0.80811	0.19189		34.31	0.85943	0.14057		34.176	0.87462	0.12538
										34.569	0.8324	0.1676		34.566	0.9085	0.0915		34.567	0.90997	0.09003		34.567	0.9448	0.0552		34.567	0.96747	0.03253		31.974	0.99187	0.00813		31.976	0.97378	0.02622		34.566	0.86256	0.13744		34.566	0.80833	0.19167		34.432	0.87663	0.12337
										34.825	0.83764	0.16236		34.821	0.89713	0.10287		34.824	0.90162	0.09838		34.822	0.84007	0.15993		34.823	0.96809	0.03191		32.211	0.97357	0.02643		32.212	0.96695	0.03305		34.822	0.84411	0.15589		34.823	0.83375	0.16625		34.687	0.86289	0.13711
										35.082	0.83025	0.16975		35.078	0.90788	0.09212		35.079	0.91421	0.08579		35.079	0.93024	0.06976		35.079	0.96712	0.03288		32.448	0.98982	0.01018		32.449	0.98449	0.01551		35.078	0.82477	0.17523		35.079	0.83761	0.16239		34.941	0.87283	0.12717
										35.337	0.83885	0.16115		35.334	0.89946	0.10054		35.335	0.90732	0.09268		35.335	1.01172	-0.01172		35.336	0.96844	0.03156		32.684	0.98721	0.01279		32.686	0.98871	0.01129		35.334	0.84363	0.15637		35.334	0.82927	0.17073		35.197	0.87238	0.12762
										35.594	0.83586	0.16414		35.59	0.89913	0.10087		35.591	0.92157	0.07843		35.591	0.88558	0.11442		35.591	0.96784	0.03216		32.921	0.97924	0.02076		32.923	0.9913	0.0087		35.59	0.84894	0.15106		35.59	0.89322	0.10678		35.452	0.86915	0.13085
										35.85	0.83119	0.16881		35.845	0.89739	0.10261		35.848	0.90914	0.09086		35.847	0.88147	0.11853		35.847	0.9659	0.0341		33.158	0.98882	0.01118		33.16	0.97576	0.02424		35.846	0.84508	0.15492		35.846	0.82326	0.17674		35.707	0.87202	0.12798
										36.106	0.81732	0.18268		36.102	0.89489	0.10511		36.104	0.90479	0.09521		36.103	0.92505	0.07495		36.103	0.9655	0.0345		33.395	0.99509	0.00491		33.396	0.98908	0.01092		36.103	0.84668	0.15332		36.103	0.81486	0.18514		35.961	0.86402	0.13598
										36.362	0.83633	0.16367		36.358	0.90382	0.09618		36.36	0.91475	0.08525		36.359	0.95181	0.04819		36.359	0.96396	0.03604		33.632	0.9898	0.0102		33.633	0.98944	0.01056		36.359	0.88689	0.11311		36.359	0.8355	0.1645		36.217	0.86581	0.13419
										36.618	0.82396	0.17604		36.614	0.89721	0.10279		36.615	0.91457	0.08543		36.616	0.94231	0.05769		36.616	0.96228	0.03772		33.868	0.98166	0.01834		33.87	0.98002	0.01998		36.615	0.84587	0.15413		36.615	0.81216	0.18784		36.471	0.87598	0.12402
										36.874	0.8175	0.1825		36.87	0.89329	0.10671		36.871	0.90917	0.09083		36.871	0.76959	0.23041		36.871	0.96612	0.03388		34.105	0.99065	0.00935		34.107	0.9877	0.0123		36.871	0.95231	0.04769		36.87	0.81464	0.18536		36.727	0.87668	0.12332
										37.13	0.81505	0.18495		37.126	0.89288	0.10712		37.127	0.91	0.09		37.128	0.93803	0.06197		37.128	0.96699	0.03301		34.343	0.98841	0.01159		34.344	0.99178	0.00822		37.127	0.85133	0.14867		37.126	0.82803	0.17197		36.982	0.85636	0.14364
										37.386	0.83049	0.16951		37.382	0.8884	0.1116		37.384	0.9159	0.0841		37.383	0.94194	0.05806		37.384	0.96648	0.03352		34.578	0.98693	0.01307		34.58	0.98988	0.01012		37.383	0.84019	0.15981		37.383	0.83519	0.16481		37.237	0.85632	0.14368
										37.642	0.82171	0.17829		37.639	0.88364	0.11636		37.64	0.92069	0.07931		37.639	0.93378	0.06622		37.64	0.96525	0.03475		34.815	0.9721	0.0279		34.817	0.98842	0.01158		37.639	0.84178	0.15822		37.639	0.79845	0.20155		37.492	0.85468	0.14532
										37.898	0.80794	0.19206		37.895	0.86511	0.13489		37.896	0.89737	0.10263		37.895	0.94026	0.05974		37.895	0.96616	0.03384		35.053	0.99602	0.00398		35.054	0.97886	0.02114		37.894	0.8486	0.1514		37.896	0.83275	0.16725		37.747	0.86634	0.13366
										38.155	0.82318	0.17682		38.15	0.866	0.134		38.152	0.91684	0.08316		38.151	0.9867	0.0133		38.151	0.96485	0.03515		35.29	0.98195	0.01805		35.292	0.98972	0.01028		38.151	0.84836	0.15164		38.152	0.78774	0.21226		38.003	0.86198	0.13802
										38.41	0.83436	0.16564		38.406	0.87934	0.12066		38.408	0.9097	0.0903		38.408	0.91723	0.08277		38.408	0.96827	0.03173		35.526	0.99	0.01		35.528	0.99044	0.00956		38.407	0.84392	0.15608		38.407	0.81302	0.18698		38.259	0.8509	0.1491
										38.667	0.8307	0.1693		38.662	0.88134	0.11866		38.663	0.91596	0.08404		38.664	0.92797	0.07203		38.664	0.96555	0.03445		35.762	0.99122	0.00878		35.765	0.984	0.016		38.663	0.84021	0.15979		38.663	0.80463	0.19537		38.513	0.86358	0.13642
										38.923	0.79944	0.20056		38.918	0.88691	0.11309		38.92	0.91899	0.08101		38.919	0.96588	0.03412		38.92	0.9634	0.0366		35.999	0.99694	0.00306		36.002	0.98546	0.01454		38.919	0.8385	0.1615		38.92	0.80426	0.19574		38.768	0.85042	0.14958
										39.179	0.81029	0.18971		39.174	0.88784	0.11216		39.175	0.90493	0.09507		39.176	0.98925	0.01075		39.176	0.96851	0.03149		36.236	0.98545	0.01455		36.239	0.98837	0.01163		39.175	1.01172	-0.01172		39.176	0.8015	0.1985		39.023	0.86483	0.13517
										39.434	0.81273	0.18727		39.431	0.884	0.116		39.432	0.9206	0.0794		39.432	0.89037	0.10963		39.432	0.96382	0.03618		36.474	0.98851	0.01149		36.475	0.98696	0.01304		39.431	0.82327	0.17673		39.432	0.82315	0.17685		39.279	0.86113	0.13887
										39.69	0.81712	0.18288		39.686	0.89429	0.10571		39.688	0.91712	0.08288		39.688	0.94597	0.05403		39.688	0.96315	0.03685		36.71	0.98611	0.01389		36.713	0.99309	0.00691		39.687	0.83018	0.16982		39.687	0.80913	0.19087		39.534	0.84762	0.15238
										39.946	0.82894	0.17106		39.942	0.89412	0.10588		39.945	0.91476	0.08524		39.944	0.92912	0.07088		39.944	0.96791	0.03209		36.947	0.9826	0.0174		36.949	0.98621	0.01379		39.943	0.8967	0.1033		39.943	0.80361	0.19639		39.789	0.86058	0.13942
										40.203	0.81246	0.18754		40.198	0.88913	0.11087		40.2	0.91246	0.08754		40.2	1.01172	-0.01172		40.2	0.96001	0.03999		37.184	0.98496	0.01504		37.186	0.98622	0.01378		40.199	0.83473	0.16527		40.199	0.81273	0.18727		40.043	0.8471	0.1529
										40.459	0.81615	0.18385		40.454	0.88034	0.11966		40.457	0.90453	0.09547		40.456	0.94509	0.05491		40.457	0.96358	0.03642		37.421	0.98497	0.01503		37.422	0.98783	0.01217		40.456	0.82048	0.17952		40.456	0.79958	0.20042		40.299	0.58998	0.41002
										40.714	0.8267	0.1733		40.711	0.88978	0.11022		40.712	0.91115	0.08885		40.712	0.93923	0.06077		40.712	0.96457	0.03543		37.658	0.98678	0.01322		37.66	0.99075	0.00925		40.711	0.83657	0.16343		40.712	0.80329	0.19671		40.554	0.85859	0.14141
										40.971	0.8051	0.1949		40.967	0.88997	0.11003		40.969	0.90168	0.09832		40.968	1.00547	-0.00547		40.969	0.96131	0.03869		37.895	0.99765	0.00235		37.897	0.99785	0.00215		40.967	0.83693	0.16307		40.968	0.80508	0.19492		40.809	0.84072	0.15928
										41.227	0.7986	0.2014		41.223	0.89026	0.10974		41.224	0.91461	0.08539		41.224	0.93706	0.06294		41.224	0.96262	0.03738		38.131	0.98966	0.01034		38.134	0.98247	0.01753		41.223	0.82395	0.17605		41.223	0.80192	0.19808		41.063	0.85634	0.14366
										41.483	0.81075	0.18925		41.479	0.88282	0.11718		41.481	0.90376	0.09624		41.48	0.95789	0.04211		41.481	0.96381	0.03619		38.368	0.97501	0.02499		38.37	0.99066	0.00934		41.48	0.81047	0.18953		41.48	0.78459	0.21541		41.319	0.84304	0.15696
										41.739	0.826	0.174		41.736	0.89173	0.10827		41.736	0.89963	0.10037		41.736	0.9392	0.0608		41.736	0.96265	0.03735		38.605	0.983	0.017		38.606	0.98551	0.01449		41.736	0.82423	0.17577		41.735	0.81004	0.18996		41.575	0.84349	0.15651
										41.995	0.81317	0.18683		41.991	0.87972	0.12028		41.993	0.90547	0.09453		41.992	0.93812	0.06188		41.993	0.96263	0.03737		38.842	0.99054	0.00946		38.844	0.99649	0.00351		41.991	0.77457	0.22543		41.992	0.81154	0.18846		41.829	0.84392	0.15608
										42.251	0.82102	0.17898		42.248	0.87981	0.12019		42.249	0.8862	0.1138		42.248	0.95725	0.04275		42.249	0.96398	0.03602		39.08	0.977	0.023		39.081	0.98168	0.01832		42.247	0.7925	0.2075		42.247	0.82474	0.17526		42.084	0.84683	0.15317
										42.507	0.81687	0.18313		42.503	0.88051	0.11949		42.505	0.88548	0.11452		42.504	0.91589	0.08411		42.504	0.96336	0.03664		39.316	0.99286	0.00714		39.318	0.99041	0.00959		42.504	0.95438	0.04562		42.504	0.814	0.186		42.339	0.85109	0.14891
										42.764	0.84083	0.15917		42.759	0.88782	0.11218		42.76	0.90678	0.09322		42.761	0.94718	0.05282		42.76	0.96129	0.03871		39.552	0.98438	0.01562		39.554	0.98078	0.01922		42.76	0.85757	0.14243		42.76	0.80177	0.19823		42.594	0.84614	0.15386
										43.019	0.81386	0.18614		43.015	0.87799	0.12201		43.016	0.91423	0.08577		43.017	0.94004	0.05996		43.017	0.96107	0.03893		39.789	0.98845	0.01155		39.792	0.9905	0.0095		43.016	0.79007	0.20993		43.017	0.75404	0.24596		42.849	0.83455	0.16545
										43.275	0.82468	0.17532		43.272	0.87221	0.12779		43.273	0.93341	0.06659		43.273	0.92155	0.07845		43.274	0.96052	0.03948		40.026	0.98282	0.01718		40.028	0.99595	0.00405		43.272	0.84338	0.15662		43.273	0.80373	0.19627		43.104	0.85261	0.14739
										43.531	0.78002	0.21998		43.528	0.87918	0.12082		43.529	0.89956	0.10044		43.529	0.93458	0.06542		43.529	0.96251	0.03749		40.264	0.98662	0.01338		40.266	0.987	0.013		43.527	0.8261	0.1739		43.529	0.82612	0.17388		43.359	0.80699	0.19301
										43.788	0.82612	0.17388		43.784	0.88273	0.11727		43.785	0.89735	0.10265		43.785	0.95941	0.04059		43.785	0.95607	0.04393		40.499	0.99133	0.00867		40.503	1.01173	-0.01173		43.784	0.69031	0.30969		43.786	0.8086	0.1914		43.614	0.84785	0.15215
										44.043	0.79143	0.20857		44.039	0.87584	0.12416		44.04	0.89897	0.10103		44.041	0.88662	0.11338		44.042	0.9586	0.0414		40.736	0.98453	0.01547		40.738	0.98902	0.01098		44.04	1.01172	-0.01172		44.042	0.7853	0.2147		43.869	0.8436	0.1564
										44.3	0.78733	0.21267		44.296	0.87911	0.12089		44.297	0.89564	0.10436		44.297	1.0029	-0.0029		44.297	0.96217	0.03783		40.974	0.98238	0.01762		40.975	0.98386	0.01614		44.296	0.82965	0.17035		44.297	0.79793	0.20207		44.124	0.84823	0.15177
										44.555	0.8313	0.1687		44.551	0.87766	0.12234		44.554	0.90584	0.09416		44.552	0.88709	0.11291		44.553	0.96045	0.03955		41.21	0.989	0.011		41.212	0.98439	0.01561		44.552	0.76381	0.23619		44.554	0.80506	0.19494		44.379	0.83983	0.16017
										44.811	0.77935	0.22065		44.807	0.8886	0.1114		44.81	0.89205	0.10795		44.808	0.93024	0.06976		44.809	0.9607	0.0393		41.447	0.98484	0.01516		41.449	0.9803	0.0197		44.808	0.82244	0.17756		44.809	0.77981	0.22019		44.634	0.90702	0.09298
										45.068	0.8036	0.1964		45.063	0.88289	0.11711		45.065	0.89983	0.10017		45.065	0.91251	0.08749		45.065	0.96493	0.03507		41.683	0.9806	0.0194		41.686	0.9888	0.0112		45.064	0.79531	0.20469		45.066	0.75764	0.24236		44.89	0.84451	0.15549
										45.323	0.80407	0.19593		45.319	0.87317	0.12683		45.322	0.90526	0.09474		45.321	0.97181	0.02819		45.321	0.9622	0.0378		41.92	0.97309	0.02691		41.923	0.9935	0.0065		45.32	0.85076	0.14924		45.322	0.76837	0.23163		45.145	0.84664	0.15336
										45.579	0.79467	0.20533		45.576	0.87637	0.12363		45.577	0.8907	0.1093		45.577	0.90592	0.09408		45.577	0.9626	0.0374		42.158	0.9923	0.0077		42.16	0.97959	0.02041		45.576	0.75938	0.24062		45.578	0.79403	0.20597		45.4	0.81835	0.18165
										45.836	0.80665	0.19335		45.832	0.86998	0.13002		45.833	0.90723	0.09277		45.832	0.91556	0.08444		45.834	0.95667	0.04333		42.395	0.9873	0.0127		42.396	0.98794	0.01206		45.833	0.80976	0.19024		45.834	0.79016	0.20984		45.654	0.8456	0.1544
										46.091	0.8045	0.1955		46.088	0.87913	0.12087		46.09	0.90653	0.09347		46.089	0.85146	0.14854		46.089	0.9588	0.0412		42.632	0.97993	0.02007		42.633	1.01172	-0.01172		46.089	0.82188	0.17812		46.089	0.80896	0.19104		45.909	0.84018	0.15982
										46.347	0.79703	0.20297		46.344	0.87094	0.12906		46.345	0.90401	0.09599		46.345	0.92592	0.07408		46.345	0.95845	0.04155		42.868	0.98012	0.01988		42.871	0.98186	0.01814		46.344	0.74938	0.25062		46.346	0.80317	0.19683		46.165	0.84226	0.15774
										46.604	0.79211	0.20789		46.6	0.87184	0.12816		46.601	0.91113	0.08887		46.601	0.92356	0.07644		46.602	0.96163	0.03837		43.105	0.9852	0.0148		43.107	0.98838	0.01162		46.6	0.80289	0.19711		46.602	0.80143	0.19857		46.42	0.83514	0.16486
										46.859	0.79408	0.20592		46.856	0.87287	0.12713		46.857	0.89046	0.10954		46.858	0.93294	0.06706		46.858	0.9578	0.0422		43.342	0.9922	0.0078		43.343	0.98052	0.01948		46.856	0.84016	0.15984		46.857	0.77698	0.22302		46.675	0.83538	0.16462
										47.116	0.77763	0.22237		47.112	0.88289	0.11711		47.113	0.89801	0.10199		47.113	1.01172	-0.01172		47.113	0.95777	0.04223		43.578	0.97976	0.02024		43.581	0.98792	0.01208		47.112	0.8607	0.1393		47.114	0.78406	0.21594		46.93	0.83666	0.16334
										47.372	0.77783	0.22217		47.368	0.86452	0.13548		47.37	0.89246	0.10754		47.369	0.94004	0.05996		47.369	0.95972	0.04028		43.816	0.98162	0.01838		43.818	0.98755	0.01245		47.369	0.81533	0.18467		47.37	0.79337	0.20663		47.185	0.81897	0.18103
										47.628	0.80188	0.19812		47.625	0.84943	0.15057		47.625	0.90319	0.09681		47.626	0.92589	0.07411		47.626	0.96043	0.03957		44.052	0.99259	0.00741		44.055	0.97964	0.02036		47.624	0.85848	0.14152		47.625	0.79905	0.20095		47.44	0.81105	0.18895
										47.883	0.77081	0.22919		47.88	0.87044	0.12956		47.882	0.90296	0.09704		47.881	0.91585	0.08415		47.881	0.95599	0.04401		44.29	0.99287	0.00713		44.291	0.97584	0.02416		47.88	0.80272	0.19728		47.882	0.76056	0.23944		47.694	0.81018	0.18982
										48.14	0.79187	0.20813		48.136	0.87286	0.12714		48.137	0.90038	0.09962		48.138	0.91928	0.08072		48.138	0.96031	0.03969		44.526	0.97375	0.02625		44.528	0.94833	0.05167		48.136	0.80637	0.19363		48.137	0.80507	0.19493		47.95	0.83232	0.16768
										48.397	0.79721	0.20279		48.392	0.86796	0.13204		48.393	0.90976	0.09024		48.394	0.93433	0.06567		48.394	0.95417	0.04583		44.763	0.98565	0.01435		44.764	0.98413	0.01587		48.393	0.58772	0.41228		48.394	0.80411	0.19589		48.206	0.83855	0.16145
										48.652	0.80808	0.19192		48.649	0.8603	0.1397		48.65	0.88551	0.11449		48.649	0.92697	0.07303		48.649	0.95468	0.04532		45.001	0.98895	0.01105		45.003	0.98005	0.01995		48.649	1.01172	-0.01172		48.65	0.80733	0.19267		48.46	0.83784	0.16216
										48.908	0.81213	0.18787		48.905	0.87443	0.12557		48.905	0.89606	0.10394		48.905	0.93793	0.06207		48.906	0.95856	0.04144		45.237	0.9823	0.0177		45.239	0.99357	0.00643		48.904	0.80934	0.19066		48.906	0.73516	0.26484		48.715	0.85675	0.14325
										49.164	0.79961	0.20039		49.161	0.8658	0.1342		49.162	0.89405	0.10595		49.161	0.9727	0.0273		49.161	0.95605	0.04395		45.473	0.98592	0.01408		45.475	0.98907	0.01093		49.161	0.81658	0.18342		49.162	0.80532	0.19468		48.97	0.81094	0.18906
										49.42	0.81341	0.18659		49.416	0.87588	0.12412		49.418	0.89726	0.10274		49.417	1.01172	-0.01172		49.418	0.95802	0.04198		45.711	0.96939	0.03061		45.712	0.98648	0.01352		49.417	0.79865	0.20135		49.418	0.78413	0.21587		49.225	0.82528	0.17472
										49.676	0.7981	0.2019		49.673	0.86724	0.13276		49.674	0.88856	0.11144		49.673	0.88741	0.11259		49.674	0.95876	0.04124		45.947	0.97782	0.02218		45.95	0.98572	0.01428		49.674	0.80066	0.19934		49.674	0.79162	0.20838		49.48	0.8302	0.1698
										49.933	0.78769	0.21231		49.929	0.87251	0.12749		49.931	0.89976	0.10024		49.93	0.91931	0.08069		49.931	0.9598	0.0402		46.185	0.98142	0.01858		46.187	0.98704	0.01296		49.929	0.8415	0.1585		49.93	0.78371	0.21629		49.735	0.8372	0.1628
										50.188	0.78113	0.21887		50.185	0.85658	0.14342		50.186	1.01172	-0.01172		50.185	0.84209	0.15791		50.187	0.9605	0.0395		46.421	0.98158	0.01842		46.424	0.99002	0.00998		50.185	0.7965	0.2035		50.187	0.76417	0.23583		49.991	0.83888	0.16112
										50.445	0.79524	0.20476		50.441	0.86405	0.13595		50.442	0.88154	0.11846		50.441	0.96377	0.03623		50.443	0.95799	0.04201		46.657	0.99083	0.00917		46.66	0.99227	0.00773		50.442	0.80766	0.19234		50.442	0.78901	0.21099		50.245	0.8307	0.1693
										50.7	0.78388	0.21612		50.697	0.86044	0.13956		50.699	0.88556	0.11444		50.698	0.90183	0.09817		50.698	0.95935	0.04065		46.894	0.98076	0.01924		46.896	0.98554	0.01446		50.698	0.79666	0.20334		50.699	0.78561	0.21439		50.501	0.79777	0.20223
										50.957	0.78382	0.21618		50.952	0.85911	0.14089		50.955	0.88222	0.11778		50.953	0.8899	0.1101		50.954	0.9563	0.0437		47.132	0.996	0.004		47.133	0.99015	0.00985		50.954	0.79614	0.20386		50.955	0.77329	0.22671		50.755	0.82094	0.17906
										51.213	0.80152	0.19848		51.209	0.86628	0.13372		51.21	0.88416	0.11584		51.21	0.91563	0.08437		51.21	0.95776	0.04224		47.368	0.99218	0.00782		47.37	0.9945	0.0055		51.211	0.80458	0.19542		51.211	0.77469	0.22531		51.01	0.82635	0.17365
										51.469	0.84705	0.15295		51.465	0.86062	0.13938		51.467	0.88522	0.11478		51.465	0.91519	0.08481		51.466	0.95697	0.04303		47.606	0.98774	0.01226		47.608	0.96437	0.03563		51.467	0.77349	0.22651		51.467	0.77213	0.22787		51.266	0.81465	0.18535
										51.725	0.7836	0.2164		51.722	0.86528	0.13472		51.722	0.88223	0.11777		51.722	0.89916	0.10084		51.722	0.9574	0.0426		47.843	0.98699	0.01301		47.843	0.98886	0.01114		51.722	0.546	0.454		51.722	0.77417	0.22583		51.521	0.80656	0.19344
										51.981	0.78502	0.21498		51.977	0.8595	0.1405		51.978	0.89117	0.10883		51.978	0.92002	0.07998		51.978	0.95673	0.04327		48.079	0.98669	0.01331		48.081	0.98636	0.01364		51.978	0.77878	0.22122		51.978	0.77268	0.22732		51.776	0.82121	0.17879
										52.237	0.79034	0.20966		52.233	0.86209	0.13791		52.234	0.8908	0.1092		52.234	0.92345	0.07655		52.234	0.95664	0.04336		48.315	0.96472	0.03528		48.318	0.99153	0.00847		52.234	0.77925	0.22075		52.235	0.77458	0.22542		52.031	0.81208	0.18792
										52.493	0.78448	0.21552		52.489	0.84895	0.15105		52.491	0.88102	0.11898		52.49	0.92372	0.07628		52.491	0.95669	0.04331		48.554	0.98893	0.01107		48.555	0.98659	0.01341		52.49	0.76711	0.23289		52.491	0.79517	0.20483		52.286	0.82394	0.17606
										52.749	0.80009	0.19991		52.745	0.86676	0.13324		52.746	0.88781	0.11219		52.747	0.9508	0.0492		52.747	0.95677	0.04323		48.79	0.97289	0.02711		48.791	0.98344	0.01656		52.746	0.80866	0.19134		52.746	0.78723	0.21277		52.541	0.81112	0.18888
										53.005	0.74074	0.25926		53.001	0.85816	0.14184		53.003	0.89222	0.10778		53.002	0.89586	0.10414		53.003	0.9536	0.0464		49.027	0.99363	0.00637		49.028	0.98943	0.01057		53.003	0.80348	0.19652		53.003	0.77578	0.22422		52.795	0.83139	0.16861
										53.261	0.78804	0.21196		53.257	0.85795	0.14205		53.258	0.88746	0.11254		53.258	0.92592	0.07408		53.258	0.95972	0.04028		49.262	0.98294	0.01706		49.266	0.95872	0.04128		53.259	0.78994	0.21006		53.259	0.78163	0.21837		53.051	0.82465	0.17535
										53.517	0.79151	0.20849		53.513	0.86324	0.13676		53.515	0.88719	0.11281		53.515	0.92221	0.07779		53.515	0.95269	0.04731		49.501	0.98678	0.01322		49.501	0.98691	0.01309		53.515	0.76615	0.23385		53.515	0.75073	0.24927		53.306	0.81875	0.18125
										53.773	0.7697	0.2303		53.769	0.85142	0.14858		53.771	0.86932	0.13068		53.771	0.9125	0.0875		53.771	0.95491	0.04509		49.737	0.98945	0.01055		49.739	0.97664	0.02336		53.771	0.78212	0.21788		53.771	0.75304	0.24696		53.561	0.83147	0.16853
										54.029	0.78812	0.21188		54.025	0.86015	0.13985		54.026	0.89156	0.10844		54.026	0.89757	0.10243		54.027	0.95497	0.04503		49.975	1.01172	-0.01172		49.976	0.97694	0.02306		54.026	0.78335	0.21665		54.027	0.78366	0.21634		53.816	0.89166	0.10834
										54.286	0.78065	0.21935		54.282	0.85022	0.14978		54.283	0.88456	0.11544		54.283	0.92495	0.07505		54.282	0.95563	0.04437		50.211	0.97642	0.02358		50.212	0.94742	0.05258		54.282	0.77671	0.22329		54.282	0.78503	0.21497		54.071	0.82037	0.17963
										54.542	0.77672	0.22328		54.537	0.84896	0.15104		54.539	0.87404	0.12596		54.539	0.88648	0.11352		54.539	0.95505	0.04495		50.447	0.98658	0.01342		50.45	0.9791	0.0209		54.538	0.78055	0.21945		54.539	0.74302	0.25698		54.327	0.85816	0.14184
										54.798	0.77146	0.22854		54.794	0.85709	0.14291		54.797	0.86287	0.13713		54.794	0.81867	0.18133		54.796	0.95241	0.04759		50.684	0.976	0.024		50.687	0.98776	0.01224		54.795	0.53082	0.46918		54.795	0.77868	0.22132		54.582	0.82114	0.17886
										55.053	0.83414	0.16586		55.049	0.85226	0.14774		55.052	0.88179	0.11821		55.05	0.92163	0.07837		55.051	0.95284	0.04716		50.921	0.97817	0.02183		50.924	0.98319	0.01681		55.051	0.74746	0.25254		55.051	0.74214	0.25786		54.836	0.81593	0.18407
										55.31	0.77502	0.22498		55.306	0.85668	0.14332		55.308	0.88534	0.11466		55.307	0.89356	0.10644		55.307	0.95472	0.04528		51.158	0.98599	0.01401		51.16	0.98585	0.01415		55.307	0.77891	0.22109		55.308	0.7419	0.2581		55.092	0.80212	0.19788
										55.566	0.76987	0.23013		55.562	0.86038	0.13962		55.564	0.88814	0.11186		55.563	0.94492	0.05508		55.563	0.95409	0.04591		51.394	0.98354	0.01646		51.396	0.98127	0.01873		55.563	0.81537	0.18463		55.564	0.77453	0.22547		55.346	0.88026	0.11974
										55.821	0.77347	0.22653		55.818	0.85546	0.14454		55.82	0.88229	0.11771		55.819	0.89107	0.10893		55.819	0.95131	0.04869		51.632	0.98223	0.01777		51.633	0.98773	0.01227		55.819	0.78609	0.21391		55.82	0.76273	0.23727		55.602	0.82094	0.17906
										56.077	0.77363	0.22637		56.073	0.85923	0.14077		56.077	0.86702	0.13298		56.075	0.92748	0.07252		56.075	0.95066	0.04934		51.868	0.97792	0.02208		51.871	0.9798	0.0202		56.075	0.79007	0.20993		56.075	0.76889	0.23111		55.856	0.80847	0.19153
										56.334	0.77948	0.22052		56.33	0.84382	0.15618		56.333	0.88167	0.11833		56.331	0.93424	0.06576		56.331	0.95043	0.04957		52.105	0.98549	0.01451		52.107	0.98286	0.01714		56.331	0.75826	0.24174		56.331	0.73793	0.26207		56.112	0.80179	0.19821
										56.589	0.76853	0.23147		56.585	0.85086	0.14914		56.588	0.86695	0.13305		56.586	0.9175	0.0825		56.588	0.95114	0.04886		52.343	0.93657	0.06343		52.344	0.96983	0.03017		56.587	0.79151	0.20849		56.588	0.75815	0.24185		56.366	0.81431	0.18569
										56.845	0.7535	0.2465		56.842	0.84887	0.15113		56.844	0.66696	0.33304		56.842	0.91928	0.08072		56.844	0.95298	0.04702		52.579	0.98208	0.01792		52.581	0.97775	0.02225		56.843	0.53164	0.46836		56.843	0.75677	0.24323		56.621	0.8296	0.1704
										57.102	0.79742	0.20258		57.098	0.85238	0.14762		57.1	0.88473	0.11527		57.099	0.84735	0.15265		57.1	0.9531	0.0469		52.815	0.98457	0.01543		52.818	0.9792	0.0208		57.099	0.69267	0.30733		57.1	0.77201	0.22799		56.876	0.81403	0.18597
										57.357	0.75663	0.24337		57.354	0.84266	0.15734		57.356	0.84157	0.15843		57.355	0.84889	0.15111		57.356	0.95141	0.04859		53.053	0.98358	0.01642		53.055	0.97143	0.02857		57.355	0.72435	0.27565		57.356	0.78782	0.21218		57.132	0.81762	0.18238
										57.613	0.75697	0.24303		57.61	0.85027	0.14973		57.612	0.8815	0.1185		57.611	0.90255	0.09745		57.612	0.9521	0.0479		53.29	0.98184	0.01816		53.292	0.97782	0.02218		57.611	0.77917	0.22083		57.612	0.76907	0.23093		57.387	0.81493	0.18507
										57.869	0.77531	0.22469		57.866	0.84901	0.15099		57.868	0.88676	0.11324		57.867	0.93092	0.06908		57.867	0.95642	0.04358		53.526	0.98674	0.01326		53.529	0.97939	0.02061		57.867	0.77516	0.22484		57.868	0.76507	0.23493		57.642	0.81372	0.18628
										58.125	0.75704	0.24296		58.122	0.83988	0.16012		58.124	0.88661	0.11339		58.123	0.75118	0.24882		58.123	0.95221	0.04779		53.764	0.98261	0.01739		53.765	0.97952	0.02048		58.124	0.77708	0.22292		58.124	0.74701	0.25299		57.897	0.80017	0.19983
										58.382	0.75766	0.24234		58.379	0.84635	0.15365		58.381	0.85998	0.14002		58.379	0.9085	0.0915		58.38	0.95187	0.04813		53.999	0.98781	0.01219		54.002	1.0117	-0.0117		58.379	0.75292	0.24708		58.379	0.75141	0.24859		58.152	0.77463	0.22537
										58.638	0.77633	0.22367		58.634	0.84617	0.15383		58.636	0.86822	0.13178		58.635	0.91594	0.08406		58.636	0.95142	0.04858		54.237	1.0117	-0.0117		54.238	0.98987	0.01013		58.636	0.77439	0.22561		58.636	0.76288	0.23712		58.407	0.79287	0.20713
										58.894	0.75038	0.24962		58.89	0.84491	0.15509		58.893	0.88626	0.11374		58.891	0.91674	0.08326		58.891	0.94854	0.05146		54.474	0.98453	0.01547		54.476	0.98718	0.01282		58.892	0.7778	0.2222		58.893	0.77513	0.22487		58.662	0.812	0.188
										59.15	0.75342	0.24658		59.147	0.84064	0.15936		59.149	0.87162	0.12838		59.147	0.91066	0.08934		59.148	0.95221	0.04779		54.711	0.9777	0.0223		54.712	0.9849	0.0151		59.148	0.77016	0.22984		59.148	0.76685	0.23315		58.917	0.80146	0.19854
										59.406	0.77228	0.22772		59.402	0.8356	0.1644		59.405	0.8722	0.1278		59.403	0.90962	0.09038		59.404	0.94961	0.05039		54.947	0.98751	0.01249		54.95	0.97545	0.02455		59.404	0.76044	0.23956		59.404	0.75801	0.24199		59.173	0.79065	0.20935
										59.662	0.74982	0.25018		59.658	0.84634	0.15366		59.661	0.87764	0.12236		59.659	0.94631	0.05369		59.661	0.95387	0.04613		55.183	0.98626	0.01374		55.186	0.98188	0.01812		59.66	0.78643	0.21357		59.66	0.76799	0.23201		59.427	0.79593	0.20407
										59.918	0.75686	0.24314		59.914	0.84502	0.15498		59.917	0.88728	0.11272		59.916	0.95841	0.04159		59.915	0.95388	0.04612		55.421	0.98137	0.01863		55.423	0.98069	0.01931		59.916	0.78035	0.21965		59.916	0.76186	0.23814		59.682	0.80149	0.19851
										60.174	0.65577	0.34423		60.171	0.83329	0.16671		60.173	0.87569	0.12431		60.171	0.9419	0.0581		60.172	0.95096	0.04904		55.659	0.97768	0.02232		55.66	0.98001	0.01999		60.171	0.77519	0.22481		60.172	0.74905	0.25095		59.938	0.80295	0.19705
										60.43	0.75974	0.24026		60.427	0.84283	0.15717		60.429	0.8865	0.1135		60.428	0.94014	0.05986		60.428	0.95357	0.04643		55.895	0.9831	0.0169		55.896	0.99642	0.00358		60.428	0.75994	0.24006		60.429	0.77584	0.22416		60.192	0.81106	0.18894
										60.687	0.7817	0.2183		60.682	0.84491	0.15509		60.685	0.89339	0.10661		60.684	0.88204	0.11796		60.684	0.94929	0.05071		56.132	0.98183	0.01817		56.133	0.97814	0.02186		60.684	0.67573	0.32427		60.684	0.7381	0.2619		60.447	0.78686	0.21314
										60.943	0.76225	0.23775		60.939	0.85036	0.14964		60.942	0.87978	0.12022		60.94	0.91161	0.08839		60.94	0.94752	0.05248		56.369	0.98222	0.01778		56.37	0.9813	0.0187		60.94	0.76449	0.23551		60.941	0.76969	0.23031		60.702	0.79784	0.20216
										61.199	0.75597	0.24403		61.194	0.84804	0.15196		61.198	0.87591	0.12409		61.196	0.90811	0.09189		61.196	0.94934	0.05066		56.605	0.97407	0.02593		56.608	0.9868	0.0132		61.196	0.82332	0.17668		61.197	0.77281	0.22719		60.958	0.78844	0.21156
										61.454	0.72773	0.27227		61.45	0.8332	0.1668		61.453	0.86203	0.13797		61.452	0.78231	0.21769		61.452	0.95299	0.04701		56.842	0.97463	0.02537		56.845	0.98187	0.01813		61.452	0.76627	0.23373		61.452	0.76972	0.23028		61.212	0.79217	0.20783
										61.71	0.72941	0.27059		61.707	0.84497	0.15503		61.71	0.87357	0.12643		61.708	0.93727	0.06273		61.708	0.94996	0.05004		57.08	0.98511	0.01489		57.081	0.98391	0.01609		61.708	0.76684	0.23316		61.709	0.72816	0.27184		61.468	0.79968	0.20032
										61.967	0.73946	0.26054		61.963	0.843	0.157		61.965	0.85541	0.14459		61.964	0.88401	0.11599		61.964	0.94958	0.05042		57.316	0.98282	0.01718		57.318	0.96832	0.03168		61.964	0.74176	0.25824		61.964	0.73506	0.26494		61.722	0.79366	0.20634
										62.223	0.7448	0.2552		62.218	0.83774	0.16226		62.222	0.88206	0.11794		62.22	0.90408	0.09592		62.221	0.94835	0.05165		57.553	0.98318	0.01682		57.554	0.97833	0.02167		62.22	0.767	0.233		62.22	0.73285	0.26715		61.978	0.80652	0.19348
										62.478	0.73138	0.26862		62.475	0.83643	0.16357		62.477	0.7856	0.2144		62.476	0.97116	0.02884		62.476	0.94758	0.05242		57.79	0.97713	0.02287		57.792	0.98427	0.01573		62.476	0.72467	0.27533		62.476	0.74534	0.25466		62.233	0.80113	0.19887
										62.735	0.75917	0.24083		62.731	0.83497	0.16503		62.734	0.87427	0.12573		62.732	0.91173	0.08827		62.733	0.94922	0.05078		58.026	0.96365	0.03635		58.028	0.98319	0.01681		62.733	0.76143	0.23857		62.733	0.72869	0.27131		62.488	0.78145	0.21855
										62.991	0.73299	0.26701		62.987	0.8387	0.1613		62.99	0.86637	0.13363		62.988	0.87131	0.12869		62.989	0.95141	0.04859		58.264	0.98378	0.01622		58.266	0.98095	0.01905		62.988	0.765	0.235		62.989	0.75911	0.24089		62.743	0.81895	0.18105
										63.247	0.73219	0.26781		63.243	0.84112	0.15888		63.245	0.87219	0.12781		63.244	0.86738	0.13262		63.245	0.9454	0.0546		58.5	0.97309	0.02691		58.502	0.98053	0.01947		63.244	0.75089	0.24911		63.245	0.76661	0.23339		62.998	0.792	0.208
										63.503	0.75662	0.24338		63.499	0.82913	0.17087		63.502	0.86424	0.13576		63.5	0.88731	0.11269		63.501	0.95134	0.04866		58.737	0.97856	0.02144		58.739	0.98442	0.01558		63.5	0.75012	0.24988		63.501	0.73114	0.26886		63.253	0.79953	0.20047
										63.759	0.70917	0.29083		63.755	0.83899	0.16101		63.757	0.87121	0.12879		63.756	0.86818	0.13182		63.757	0.94773	0.05227		58.973	0.98235	0.01765		58.976	0.98406	0.01594		63.757	0.8965	0.1035		63.756	0.76812	0.23188		63.508	0.79302	0.20698
										64.015	0.7299	0.2701		64.011	0.83182	0.16818		64.014	0.87424	0.12576		64.013	0.95358	0.04642		64.013	0.94887	0.05113		59.211	0.9814	0.0186		59.212	0.97994	0.02006		64.013	0.75465	0.24535		64.013	0.71429	0.28571		63.763	0.78977	0.21023
										64.271	0.76212	0.23788		64.268	0.83972	0.16028		64.27	0.88094	0.11906		64.268	0.90693	0.09307		64.269	0.94998	0.05002		59.448	0.98239	0.01761		59.45	0.9808	0.0192		64.269	0.75429	0.24571		64.269	0.76956	0.23044		64.018	0.80029	0.19971
										64.528	0.72694	0.27306		64.524	0.82565	0.17435		64.525	0.86725	0.13275		64.525	0.91189	0.08811		64.525	0.94791	0.05209		59.685	0.98606	0.01394		59.686	0.9805	0.0195		64.524	0.76476	0.23524		64.525	0.7417	0.2583		64.273	0.79656	0.20344
										64.783	0.7892	0.2108		64.779	0.83351	0.16649		64.782	0.86166	0.13834		64.78	0.93052	0.06948		64.781	0.94669	0.05331		59.922	0.97636	0.02364		59.922	0.98762	0.01238		64.781	0.75036	0.24964		64.781	0.74014	0.25986		64.528	0.78857	0.21143
										65.04	0.7612	0.2388		65.035	0.83546	0.16454		65.037	0.86178	0.13822		65.036	0.90451	0.09549		65.037	0.9511	0.0489		60.159	0.99139	0.00861		60.16	0.97594	0.02406		65.037	0.82368	0.17632		65.037	0.74733	0.25267		64.784	0.79129	0.20871
										65.295	0.74703	0.25297		65.292	0.8266	0.1734		65.294	0.86888	0.13112		65.293	0.89759	0.10241		65.293	0.94502	0.05498		60.395	0.98011	0.01989		60.398	0.98472	0.01528		65.294	0.76488	0.23512		65.293	0.74373	0.25627		65.039	0.79631	0.20369
										65.551	0.76288	0.23712		65.547	0.83663	0.16337		65.55	0.86401	0.13599		65.548	0.94392	0.05608		65.549	0.94537	0.05463		60.632	0.97605	0.02395		60.634	0.97171	0.02829		65.549	0.75023	0.24977		65.549	0.7374	0.2626		65.293	0.81603	0.18397
										65.808	0.79208	0.20792		65.803	0.82574	0.17426		65.806	0.86427	0.13573		65.804	0.95803	0.04197		65.806	0.94818	0.05182		60.869	0.96862	0.03138		60.871	0.98087	0.01913		65.805	0.72047	0.27953		65.805	0.74041	0.25959		65.549	0.80096	0.19904
										66.064	0.74526	0.25474		66.059	0.83265	0.16735		66.062	1.01172	-0.01172		66.06	0.84855	0.15145		66.061	0.94662	0.05338		61.105	0.97337	0.02663		61.107	0.97684	0.02316		66.061	0.76416	0.23584		66.061	0.71906	0.28094		65.803	0.79393	0.20607
										66.319	0.70681	0.29319		66.316	0.8379	0.1621		66.318	0.85008	0.14992		66.316	0.93196	0.06804		66.318	0.94986	0.05014		61.343	0.97422	0.02578		61.344	0.98547	0.01453		66.317	0.72391	0.27609		66.317	0.71835	0.28165		66.059	0.79633	0.20367
										66.575	0.73634	0.26366		66.571	0.82492	0.17508		66.574	0.8813	0.1187		66.573	0.9143	0.0857		66.573	0.94431	0.05569		61.579	0.9775	0.0225		61.581	0.97873	0.02127		66.573	0.76281	0.23719		66.573	0.73605	0.26395		66.313	0.79326	0.20674
										66.832	0.76344	0.23656		66.828	0.83298	0.16702		66.83	0.86037	0.13963		66.829	0.75574	0.24426		66.83	0.94429	0.05571		61.817	0.97749	0.02251		61.819	0.98027	0.01973		66.829	0.75581	0.24419		66.829	0.75737	0.24263		66.568	0.78198	0.21802
										67.088	0.7416	0.2584		67.084	0.82895	0.17105		67.086	0.86642	0.13358		67.085	0.86981	0.13019		67.085	0.94512	0.05488		62.053	0.97257	0.02743		62.055	0.97439	0.02561		67.085	0.7516	0.2484		67.086	0.76123	0.23877		66.824	0.76622	0.23378
										67.344	0.73124	0.26876		67.34	0.82501	0.17499		67.343	0.85024	0.14976		67.342	0.88661	0.11339		67.342	0.94592	0.05408		62.29	0.98631	0.01369		62.292	0.98117	0.01883		67.341	0.73761	0.26239		67.342	0.75564	0.24436		67.079	0.79488	0.20512
										67.599	0.74345	0.25655		67.596	0.81461	0.18539		67.598	0.87092	0.12908		67.598	0.73397	0.26603		67.597	0.94474	0.05526		62.527	0.96415	0.03585		62.529	0.93821	0.06179		67.597	0.73988	0.26012		67.598	0.71905	0.28095		67.333	0.78929	0.21071
										67.856	0.75734	0.24266		67.851	0.83127	0.16873		67.854	0.84677	0.15323		67.854	0.89358	0.10642		67.854	0.94819	0.05181		62.763	0.97737	0.02263		62.765	0.98247	0.01753		67.853	0.75797	0.24203		67.854	0.7062	0.2938		67.588	0.77748	0.22252
										68.112	0.73111	0.26889		68.109	0.82892	0.17108		68.11	0.85467	0.14533		68.11	0.95937	0.04063		68.11	0.94586	0.05414		63.001	0.97213	0.02787		63.002	0.98416	0.01584		68.109	0.74542	0.25458		68.11	0.70827	0.29173		67.844	0.79327	0.20673
										68.369	0.73788	0.26212		68.364	0.8166	0.1834		68.366	0.84208	0.15792		68.367	0.90626	0.09374		68.366	0.93976	0.06024		63.237	0.98513	0.01487		63.239	0.97968	0.02032		68.366	0.73207	0.26793		68.365	0.72062	0.27938		68.099	0.79273	0.20727
										68.624	0.71778	0.28222		68.62	0.81972	0.18028		68.622	0.84051	0.15949		68.623	0.90066	0.09934		68.622	0.94586	0.05414		63.475	0.98485	0.01515		63.476	0.98166	0.01834		68.622	0.7642	0.2358		68.622	0.73362	0.26638		68.354	0.77882	0.22118
										68.88	0.75578	0.24422		68.876	0.82936	0.17064		68.879	0.85974	0.14026		68.878	0.90452	0.09548		68.877	0.94259	0.05741		63.71	0.98191	0.01809		63.713	0.98487	0.01513		68.878	0.84277	0.15723		68.878	0.74407	0.25593		68.609	0.78294	0.21706
										69.136	0.74597	0.25403		69.133	0.83502	0.16498		69.135	0.8678	0.1322		69.134	0.9034	0.0966		69.133	0.94549	0.05451		63.948	0.97882	0.02118		63.95	0.98241	0.01759		69.133	0.75304	0.24696		69.134	0.72578	0.27422		68.865	0.77671	0.22329
										69.392	0.71532	0.28468		69.388	0.82548	0.17452		69.39	0.86969	0.13031		69.39	0.92169	0.07831		69.39	0.94345	0.05655		64.185	0.97893	0.02107		64.187	0.97706	0.02294		69.389	0.74224	0.25776		69.39	0.70835	0.29165		69.119	0.7652	0.2348
										69.648	0.75302	0.24698		69.644	0.82113	0.17887		69.647	0.86469	0.13531		69.647	0.9432	0.0568		69.646	0.93866	0.06134		64.422	0.97876	0.02124		64.424	0.97742	0.02258		69.645	0.70828	0.29172		69.646	0.72783	0.27217		69.375	0.77939	0.22061
										69.903	0.74303	0.25697		69.9	0.83116	0.16884		69.902	0.87493	0.12507		69.903	0.89105	0.10895		69.902	0.94139	0.05861		64.658	0.97715	0.02285		64.66	0.98232	0.01768		69.901	0.74331	0.25669		69.902	0.72656	0.27344		69.629	0.78857	0.21143
										70.16	0.73763	0.26237		70.157	0.82441	0.17559		70.158	0.84423	0.15577		70.159	0.89596	0.10404		70.158	0.94006	0.05994		64.894	0.97476	0.02524		64.898	0.98493	0.01507		70.157	0.77276	0.22724		70.158	0.73636	0.26364		69.884	0.78363	0.21637
										70.416	0.75155	0.24845		70.413	0.82786	0.17214		70.415	0.86976	0.13024		70.414	0.89819	0.10181		70.414	0.94222	0.05778		65.132	0.98862	0.01138		65.135	0.98224	0.01776		70.414	0.74454	0.25546		70.414	0.72884	0.27116		70.139	0.77715	0.22285
										70.672	0.72967	0.27033		70.668	0.82018	0.17982		70.67	0.85953	0.14047		70.671	0.94664	0.05336		70.669	0.94316	0.05684		65.369	0.98522	0.01478		65.37	0.97491	0.02509		70.67	0.78577	0.21423		70.671	0.72705	0.27295		70.395	0.77893	0.22107
										70.929	0.7313	0.2687		70.925	0.81233	0.18767		70.926	0.85918	0.14082		70.926	0.90538	0.09462		70.926	0.9426	0.0574		65.607	0.97546	0.02454		65.607	0.98632	0.01368		70.926	0.73535	0.26465		70.927	0.71475	0.28525		70.65	0.78076	0.21924
										71.184	0.74198	0.25802		71.18	0.82314	0.17686		71.182	0.85308	0.14692		71.182	1.01172	-0.01172		71.182	0.94211	0.05789		65.843	0.98145	0.01855		65.844	0.98029	0.01971		71.182	0.74593	0.25407		71.183	0.69774	0.30226		70.904	0.77632	0.22368
										71.44	0.72869	0.27131		71.437	0.82052	0.17948		71.439	0.86158	0.13842		71.439	0.86828	0.13172		71.439	0.94271	0.05729		66.079	0.98018	0.01982		66.081	0.95979	0.04021		71.439	0.72377	0.27623		71.438	0.72907	0.27093		71.159	0.76781	0.23219
										71.697	0.7099	0.2901		71.693	0.83005	0.16995		71.695	0.85024	0.14976		71.695	0.89334	0.10666		71.694	0.9428	0.0572		66.316	0.97647	0.02353		66.319	0.97083	0.02917		71.694	0.71824	0.28176		71.694	0.7345	0.2655		71.414	0.78028	0.21972
										71.953	0.73811	0.26189		71.949	0.82101	0.17899		71.951	0.86699	0.13301		71.95	0.90648	0.09352		71.95	0.94469	0.05531		66.553	0.98723	0.01277		66.555	0.97501	0.02499		71.95	0.73762	0.26238		71.951	0.72245	0.27755		71.669	0.77217	0.22783
										72.208	0.73053	0.26947		72.205	0.79391	0.20609		72.207	0.86535	0.13465		72.207	0.90091	0.09909		72.206	0.9441	0.0559		66.79	0.98891	0.01109		66.793	0.98067	0.01933		72.206	1.01172	-0.01172		72.206	0.73072	0.26928		71.925	0.77619	0.22381
										72.465	0.71227	0.28773		72.461	0.81997	0.18003		72.463	0.83923	0.16077		72.463	0.87454	0.12546		72.463	0.94375	0.05625		67.027	0.98694	0.01306		67.03	0.97998	0.02002		72.463	0.75527	0.24473		72.463	0.73876	0.26124		72.179	0.77185	0.22815
										72.721	0.7332	0.2668		72.716	0.81348	0.18652		72.72	0.83279	0.16721		72.718	0.90586	0.09414		72.718	0.94095	0.05905		67.265	0.97174	0.02826		67.267	0.97827	0.02173		72.718	0.75841	0.24159		72.718	0.71081	0.28919		72.435	0.75796	0.24204
										72.977	0.72016	0.27984		72.973	0.81627	0.18373		72.975	0.85033	0.14967		72.975	0.86893	0.13107		72.974	0.94223	0.05777		67.5	0.98407	0.01593		67.502	0.97535	0.02465		72.974	0.6675	0.3325		72.975	0.72255	0.27745		72.69	0.76548	0.23452
										73.232	0.71457	0.28543		73.228	0.81464	0.18536		73.231	0.85714	0.14286		73.231	0.87527	0.12473		73.23	0.94248	0.05752		67.737	0.98099	0.01901		67.74	0.98343	0.01657		73.231	0.72232	0.27768		73.23	0.71728	0.28272		72.945	0.76414	0.23586
										73.489	0.73131	0.26869		73.485	0.82005	0.17995		73.488	0.85631	0.14369		73.487	0.87541	0.12459		73.487	0.93901	0.06099		67.974	0.97004	0.02996		67.976	0.97332	0.02668		73.486	0.74971	0.25029		73.487	0.70886	0.29114		73.199	0.72133	0.27867
										73.745	0.72823	0.27177		73.741	0.81725	0.18275		73.744	0.85478	0.14522		73.743	0.89733	0.10267		73.742	0.94225	0.05775		68.212	0.9819	0.0181		68.213	0.98031	0.01969		73.742	0.72976	0.27024		73.742	0.73522	0.26478		73.455	0.782	0.218
										74.001	0.71696	0.28304		73.997	0.81223	0.18777		73.999	0.85432	0.14568		73.999	0.92083	0.07917		73.998	0.93594	0.06406		68.447	0.98347	0.01653		68.451	0.97904	0.02096		73.998	0.83048	0.16952		73.999	0.69682	0.30318		73.71	0.78231	0.21769
										74.256	0.72674	0.27326		74.253	0.81259	0.18741		74.256	0.84366	0.15634		74.255	0.88153	0.11847		74.254	0.94146	0.05854		68.684	0.98606	0.01394		68.686	0.9523	0.0477		74.255	0.73657	0.26343		74.255	0.70644	0.29356		73.965	0.78368	0.21632
										74.513	0.73042	0.26958		74.509	0.81508	0.18492		74.511	0.85567	0.14433		74.512	0.94275	0.05725		74.511	0.94535	0.05465		68.921	0.98237	0.01763		68.924	0.98423	0.01577		74.51	0.70437	0.29563		74.51	0.73249	0.26751		74.221	0.75855	0.24145
										74.769	0.72717	0.27283		74.765	0.81122	0.18878		74.767	0.84926	0.15074		74.767	0.89393	0.10607		74.767	0.93923	0.06077		69.158	0.97778	0.02222		69.161	0.97977	0.02023		74.767	0.73795	0.26205		74.767	0.71952	0.28048		74.475	0.76755	0.23245
										75.024	0.73243	0.26757		75.021	0.80602	0.19398		75.024	0.84888	0.15112		75.024	0.94984	0.05016		75.023	0.94195	0.05805		69.395	0.98631	0.01369		69.398	0.98534	0.01466		75.022	0.72718	0.27282		75.023	0.68751	0.31249		74.73	0.71762	0.28238
										75.281	0.7107	0.2893		75.278	0.82283	0.17717		75.28	0.85257	0.14743		75.279	0.85536	0.14464		75.279	0.94496	0.05504		69.632	0.97828	0.02172		69.635	0.96958	0.03042		75.278	0.73765	0.26235		75.279	0.72754	0.27246		74.985	0.7671	0.2329
										75.537	0.73385	0.26615		75.534	0.80915	0.19085		75.536	0.84283	0.15717		75.536	0.86888	0.13112		75.535	0.93932	0.06068		69.869	0.97344	0.02656		69.872	0.98081	0.01919		75.534	0.71188	0.28812		75.536	0.72577	0.27423		75.241	0.7616	0.2384
										75.794	0.72103	0.27897		75.789	0.80301	0.19699		75.792	0.84766	0.15234		75.791	0.92513	0.07487		75.791	0.93825	0.06175		70.106	0.98407	0.01593		70.109	0.98517	0.01483		75.791	0.72698	0.27302		75.791	0.71178	0.28822		75.496	0.72455	0.27545
										76.049	0.72159	0.27841		76.046	0.80775	0.19225		76.048	0.86771	0.13229		76.048	0.87095	0.12905		76.047	0.94071	0.05929		70.343	0.98277	0.01723		70.345	0.98454	0.01546		76.047	0.72023	0.27977		76.047	0.70077	0.29923		75.75	0.77876	0.22124
										76.305	0.68041	0.31959		76.302	0.81662	0.18338		76.304	0.84473	0.15527		76.304	0.87522	0.12478		76.303	0.93823	0.06177		70.58	0.97464	0.02536		70.582	0.97491	0.02509		76.304	0.7176	0.2824		76.303	0.71216	0.28784		76.006	0.76599	0.23401
										76.561	0.70314	0.29686		76.557	0.80813	0.19187		76.56	0.8376	0.1624		76.56	0.951	0.049		76.559	0.93838	0.06162		70.816	0.97847	0.02153		70.819	0.97353	0.02647		76.56	0.73461	0.26539		76.56	0.6816	0.3184		76.26	0.77754	0.22246
										76.817	0.72716	0.27284		76.813	0.80667	0.19333		76.816	0.86302	0.13698		76.815	0.95157	0.04843		76.815	0.94315	0.05685		71.054	0.97582	0.02418		71.056	0.97388	0.02612		76.816	0.713	0.287		76.815	0.70857	0.29143		76.516	0.77498	0.22502
										77.073	0.71292	0.28708		77.069	0.8205	0.1795		77.072	0.85189	0.14811		77.071	0.8838	0.1162		77.072	0.93996	0.06004		71.29	0.97174	0.02826		71.293	0.97237	0.02763		77.072	0.7037	0.2963		77.071	0.70552	0.29448		76.77	0.75505	0.24495
										77.33	0.711	0.289		77.326	0.80517	0.19483		77.329	0.86504	0.13496		77.328	0.96726	0.03274		77.328	0.93937	0.06063		71.527	0.97246	0.02754		71.531	0.98	0.02		77.328	0.74051	0.25949		77.327	0.72406	0.27594		77.026	0.75474	0.24526
										77.586	0.73253	0.26747		77.582	0.80293	0.19707		77.584	0.85783	0.14217		77.584	0.84894	0.15106		77.583	0.93807	0.06193		71.764	0.9788	0.0212		71.767	0.98103	0.01897		77.584	0.72362	0.27638		77.584	0.76461	0.23539		77.28	0.77285	0.22715
										77.841	0.71447	0.28553		77.838	0.80668	0.19332		77.84	0.86208	0.13792		77.84	0.84963	0.15037		77.84	0.94059	0.05941		72.001	0.96843	0.03157		72.004	0.95149	0.04851		77.841	0.71827	0.28173		77.839	0.69598	0.30402		77.535	0.76436	0.23564
										78.097	0.725	0.275		78.094	0.80596	0.19404		78.097	0.83834	0.16166		78.096	0.89689	0.10311		78.095	0.93814	0.06186		72.237	0.97378	0.02622		72.241	0.9743	0.0257		78.096	0.70565	0.29435		78.095	0.71674	0.28326		77.791	0.76473	0.23527
										78.354	0.72864	0.27136		78.35	0.80409	0.19591		78.353	0.84889	0.15111		78.351	0.88354	0.11646		78.351	0.93712	0.06288		72.474	0.97236	0.02764		72.477	0.95734	0.04266		78.352	0.68021	0.31979		78.352	0.72205	0.27795		78.045	0.76393	0.23607
										78.61	0.72149	0.27851		78.606	0.79792	0.20208		78.608	0.85608	0.14392		78.608	0.88656	0.11344		78.607	0.9344	0.0656		72.711	0.97621	0.02379		72.714	0.97744	0.02256		78.608	0.65567	0.34433		78.608	0.70605	0.29395		78.3	0.76834	0.23166
										78.866	0.71579	0.28421		78.861	0.79921	0.20079		78.865	0.85816	0.14184		78.864	0.92014	0.07986		78.863	0.9358	0.0642		72.948	0.97958	0.02042		72.951	0.97049	0.02951		78.865	0.72295	0.27705		78.864	0.69779	0.30221		78.555	0.76482	0.23518
										79.121	0.70242	0.29758		79.118	0.80317	0.19683		79.12	0.72019	0.27981		79.12	0.86223	0.13777		79.12	0.94106	0.05894		73.185	0.9841	0.0159		73.188	0.99083	0.00917		79.121	0.73245	0.26755		79.12	0.72667	0.27333		78.811	0.75077	0.24923
										79.378	0.70323	0.29677		79.374	0.79265	0.20735		79.376	1.01172	-0.01172		79.376	0.89747	0.10253		79.375	0.93768	0.06232		73.421	0.9769	0.0231		73.424	0.97481	0.02519		79.377	0.72916	0.27084		79.375	0.72257	0.27743		79.066	0.75944	0.24056
										79.634	0.7147	0.2853		79.63	0.80902	0.19098		79.633	0.85871	0.14129		79.632	0.8812	0.1188		79.631	0.9388	0.0612		73.658	0.9662	0.0338		73.661	0.97473	0.02527		79.632	0.69076	0.30924		79.632	0.70324	0.29676		79.321	0.76546	0.23454
										79.89	0.73226	0.26774		79.886	0.80609	0.19391		79.888	0.84815	0.15185		79.888	0.81934	0.18066		79.889	0.94183	0.05817		73.896	0.9731	0.0269		73.898	0.98301	0.01699		79.888	0.72543	0.27457		79.888	0.70342	0.29658		79.577	0.74676	0.25324
										80.146	0.71734	0.28266		80.143	0.807	0.193		80.146	0.85291	0.14709		80.145	0.89302	0.10698		80.145	0.93395	0.06605		74.132	0.97487	0.02513		74.135	0.98042	0.01958		80.145	0.71357	0.28643		80.144	0.70677	0.29323		79.831	0.76545	0.23455
										80.402	0.71449	0.28551		80.398	0.80152	0.19848		80.4	0.85356	0.14644		80.401	0.90128	0.09872		80.401	0.93635	0.06365		74.369	0.97953	0.02047		74.373	0.97559	0.02441		80.4	0.7271	0.2729		80.4	0.72373	0.27627		80.086	0.76085	0.23915
										80.658	0.69769	0.30231		80.654	0.79966	0.20034		80.657	0.85763	0.14237		80.657	0.89223	0.10777		80.657	0.93643	0.06357		74.606	0.96911	0.03089		74.609	0.97975	0.02025		80.657	0.71257	0.28743		80.656	0.70826	0.29174		80.341	0.74481	0.25519
										80.914	0.73083	0.26917		80.91	0.79319	0.20681		80.913	0.85544	0.14456		80.912	0.88748	0.11252		80.913	0.93737	0.06263		74.843	0.9728	0.0272		74.847	0.97524	0.02476		80.913	0.714	0.286		80.912	0.70187	0.29813		80.596	0.74604	0.25396
										81.17	0.71688	0.28312		81.166	0.80694	0.19306		81.169	0.84237	0.15763		81.169	0.88414	0.11586		81.169	0.93604	0.06396		75.08	0.98135	0.01865		75.082	0.97209	0.02791		81.169	0.72264	0.27736		81.168	0.72478	0.27522		80.85	0.75522	0.24478
										81.426	0.69171	0.30829		81.423	0.79464	0.20536		81.425	0.85384	0.14616		81.424	0.87883	0.12117		81.425	0.93579	0.06421		75.317	0.97464	0.02536		75.319	0.97264	0.02736		81.425	0.71697	0.28303		81.424	0.70336	0.29664		81.107	0.74918	0.25082
										81.682	0.7213	0.2787		81.678	0.80117	0.19883		81.681	0.85276	0.14724		81.68	0.87918	0.12082		81.681	0.93396	0.06604		75.554	0.97413	0.02587		75.557	0.97155	0.02845		81.681	0.72077	0.27923		81.68	0.7305	0.2695		81.362	0.76884	0.23116
										81.938	0.7139	0.2861		81.935	0.79811	0.20189		81.937	0.85046	0.14954		81.937	0.91602	0.08398		81.937	0.93685	0.06315		75.789	0.97906	0.02094		75.793	0.99023	0.00977		81.937	0.73001	0.26999		81.936	0.76497	0.23503		81.616	0.70137	0.29863
										82.194	0.71066	0.28934		82.191	0.78631	0.21369		82.193	1.01172	-0.01172		82.192	0.92584	0.07416		82.193	0.93791	0.06209		76.026	0.97999	0.02001		76.031	0.97552	0.02448		82.193	0.56151	0.43849		82.192	0.70406	0.29594		81.872	0.75998	0.24002
										82.45	0.7049	0.2951		82.447	0.79448	0.20552		82.449	0.85168	0.14832		82.449	0.88788	0.11212		82.449	0.93472	0.06528		76.264	0.98171	0.01829		76.267	0.97926	0.02074		82.449	0.70631	0.29369		82.448	0.68647	0.31353		82.126	0.74532	0.25468
										82.706	0.70656	0.29344		82.703	0.79239	0.20761		82.705	0.85049	0.14951		82.705	0.87731	0.12269		82.705	0.93765	0.06235		76.502	0.97379	0.02621		76.504	0.96524	0.03476		82.706	0.73851	0.26149		82.705	0.7046	0.2954		82.381	0.75359	0.24641
										82.963	0.70504	0.29496		82.958	0.79981	0.20019		82.961	0.83819	0.16181		82.961	0.89043	0.10957		82.962	0.93616	0.06384		76.738	0.98567	0.01433		76.741	0.97687	0.02313		82.961	0.71554	0.28446		82.96	0.69262	0.30738		82.636	0.76162	0.23838
										83.219	0.70634	0.29366		83.214	0.78861	0.21139		83.218	0.85053	0.14947		83.216	0.89171	0.10829		83.218	0.93526	0.06474		76.974	0.97225	0.02775		76.978	0.9853	0.0147		83.217	0.76159	0.23841		83.216	0.68706	0.31294		82.891	0.74166	0.25834
										83.474	0.69872	0.30128		83.471	0.78657	0.21343		83.473	0.84091	0.15909		83.472	0.92862	0.07138		83.473	0.9365	0.0635		77.211	0.96103	0.03897		77.214	0.97314	0.02686		83.473	0.74012	0.25988		83.472	0.69674	0.30326		83.146	0.75493	0.24507
										83.731	0.73151	0.26849		83.727	0.7875	0.2125		83.729	0.84746	0.15254		83.729	0.89849	0.10151		83.729	0.93658	0.06342		77.449	0.98443	0.01557		77.451	0.97125	0.02875		83.729	0.7336	0.2664		83.729	0.69857	0.30143		83.402	0.74592	0.25408
										83.987	0.70277	0.29723		83.982	0.80327	0.19673		83.986	0.84331	0.15669		83.986	0.86381	0.13619		83.986	0.93521	0.06479		77.685	0.97016	0.02984		77.688	0.97545	0.02455		83.986	0.72308	0.27692		83.985	0.70298	0.29702		83.657	0.75985	0.24015
										84.242	0.72174	0.27826		84.24	0.79116	0.20884		84.241	0.84295	0.15705		84.241	0.92643	0.07357		84.242	0.93004	0.06996		77.922	0.97744	0.02256		77.925	0.97807	0.02193		84.241	0.7261	0.2739		84.241	0.68683	0.31317		83.912	0.779	0.221
										84.499	0.70453	0.29547		84.495	0.79672	0.20328		84.498	0.83904	0.16096		84.497	0.8858	0.1142		84.497	0.93427	0.06573		78.159	0.98028	0.01972		78.162	0.97111	0.02889		84.497	0.76742	0.23258		84.496	0.71638	0.28362		84.167	0.75945	0.24055
										84.754	0.73654	0.26346		84.751	0.79923	0.20077		84.753	0.85065	0.14935		84.753	0.82983	0.17017		84.753	0.93334	0.06666		78.396	0.96788	0.03212		78.399	0.97417	0.02583		84.753	0.75756	0.24244		84.753	0.7122	0.2878		84.422	0.73917	0.26083
										85.011	0.72526	0.27474		85.007	0.80148	0.19852		85.009	0.83743	0.16257		85.009	0.77282	0.22718		85.01	0.93841	0.06159		78.633	0.97904	0.02096		78.636	0.98517	0.01483		85.01	0.72448	0.27552		85.009	0.69234	0.30766		84.677	0.66144	0.33856
										85.268	0.69833	0.30167		85.263	0.78317	0.21683		85.266	0.8266	0.1734		85.266	0.88034	0.11966		85.266	0.93224	0.06776		78.87	0.96753	0.03247		78.872	0.97439	0.02561		85.266	0.70993	0.29007		85.265	0.71509	0.28491		84.932	0.72981	0.27019
										85.524	0.70555	0.29445		85.519	0.78325	0.21675		85.522	0.85391	0.14609		85.521	0.73578	0.26422		85.522	0.93779	0.06221		79.106	0.96664	0.03336		79.11	0.97971	0.02029		85.521	0.65791	0.34209		85.52	0.70007	0.29993		85.187	0.7416	0.2584
										85.779	0.69634	0.30366		85.775	0.78657	0.21343		85.777	0.82689	0.17311		85.777	0.88159	0.11841		85.778	0.93171	0.06829		79.344	0.9711	0.0289		79.346	0.97807	0.02193		85.777	0.69746	0.30254		85.777	0.66001	0.33999		85.442	0.7405	0.2595
										86.035	0.71357	0.28643		86.031	0.7751	0.2249		86.033	0.83993	0.16007		86.033	0.88742	0.11258		86.035	0.93342	0.06658		79.58	0.98281	0.01719		79.583	0.97089	0.02911		86.034	0.71196	0.28804		86.033	0.69171	0.30829		85.697	0.73599	0.26401
										86.291	0.68669	0.31331		86.287	0.7924	0.2076		86.29	0.8525	0.1475		86.29	0.89003	0.10997		86.29	0.93522	0.06478		79.817	0.98049	0.01951		79.82	0.97973	0.02027		86.29	0.68308	0.31692		86.289	0.69428	0.30572		85.952	0.76234	0.23766
										86.547	0.68437	0.31563		86.544	0.79273	0.20727		86.546	0.84037	0.15963		86.546	0.89114	0.10886		86.546	0.93389	0.06611		80.054	0.98079	0.01921		80.057	0.97986	0.02014		86.546	0.70717	0.29283		86.545	0.67011	0.32989		86.207	0.74474	0.25526
										86.803	0.71126	0.28874		86.8	0.77924	0.22076		86.802	0.8335	0.1665		86.802	0.86498	0.13502		86.801	0.93353	0.06647		80.29	0.972	0.028		80.294	0.97571	0.02429		86.802	0.71418	0.28582		86.801	0.71606	0.28394		86.463	0.74979	0.25021
										87.06	0.68579	0.31421		87.056	0.79865	0.20135		87.058	0.8397	0.1603		87.058	0.87564	0.12436		87.058	0.93306	0.06694		80.526	0.98275	0.01725		80.531	0.9774	0.0226		87.058	0.70155	0.29845		87.057	0.70439	0.29561		86.717	0.69427	0.30573
										87.315	0.67816	0.32184		87.311	0.79338	0.20662		87.314	0.84725	0.15275		87.313	0.88668	0.11332		87.314	0.9363	0.0637		80.764	0.97454	0.02546		80.768	0.97934	0.02066		87.314	0.7097	0.2903		87.314	0.71009	0.28991		86.972	0.7537	0.2463
										87.572	0.68713	0.31287		87.568	0.7947	0.2053		87.569	0.83691	0.16309		87.569	0.85921	0.14079		87.571	0.93475	0.06525		81	0.99051	0.00949		81.004	0.97652	0.02348		87.57	0.70583	0.29417		87.569	0.6835	0.3165		87.227	0.73658	0.26342
										87.828	0.70123	0.29877		87.824	0.78105	0.21895		87.827	0.85846	0.14154		87.826	0.7207	0.2793		87.826	0.93263	0.06737		81.238	0.98627	0.01373		81.24	0.97668	0.02332		87.826	0.78694	0.21306		87.826	0.68536	0.31464		87.483	0.74568	0.25432
										88.084	0.71888	0.28112		88.08	0.78018	0.21982		88.082	0.84041	0.15959		88.081	0.90428	0.09572		88.083	0.93461	0.06539		81.475	0.98468	0.01532		81.478	0.98056	0.01944		88.083	0.68298	0.31702		88.081	0.68041	0.31959		87.738	0.73546	0.26454
										88.34	0.68132	0.31868		88.336	0.79973	0.20027		88.338	0.83681	0.16319		88.338	0.93047	0.06953		88.339	0.93007	0.06993		81.712	0.97977	0.02023		81.715	0.97602	0.02398		88.338	0.70552	0.29448		88.338	0.68027	0.31973		87.992	0.75043	0.24957
										88.595	0.66782	0.33218		88.592	0.78414	0.21586		88.594	0.83019	0.16981		88.594	0.85362	0.14638		88.594	0.93357	0.06643		81.948	0.9793	0.0207		81.952	0.90812	0.09188		88.594	0.70848	0.29152		88.594	0.69892	0.30108		88.247	0.73418	0.26582
										88.852	0.69042	0.30958		88.848	0.78423	0.21577		88.851	0.84029	0.15971		88.85	0.88046	0.11954		88.851	0.93493	0.06507		82.185	0.97296	0.02704		82.188	0.96383	0.03617		88.85	0.69377	0.30623		88.85	0.68472	0.31528		88.503	0.72829	0.27171
										89.107	0.67891	0.32109		89.103	0.77828	0.22172		89.107	0.83879	0.16121		89.106	0.87324	0.12676		89.106	0.92912	0.07088		82.422	0.98314	0.01686		82.425	0.97987	0.02013		89.106	0.69353	0.30647		89.105	0.6829	0.3171		88.757	0.67909	0.32091
										89.364	0.7027	0.2973		89.361	0.78376	0.21624		89.362	0.82743	0.17257		89.362	0.87671	0.12329		89.363	0.93136	0.06864		82.659	0.97357	0.02643		82.662	0.97786	0.02214		89.362	0.69242	0.30758		89.361	0.70224	0.29776		89.013	0.78547	0.21453
										89.62	0.68994	0.31006		89.616	0.7843	0.2157		89.618	0.83863	0.16137		89.618	0.8785	0.1215		89.619	0.9352	0.0648		82.895	0.96893	0.03107		82.899	0.98547	0.01453		89.618	0.62308	0.37692		89.618	0.69346	0.30654		89.267	0.73763	0.26237
										89.876	0.70983	0.29017		89.872	0.78479	0.21521		89.875	0.82826	0.17174		89.875	0.75376	0.24624		89.875	0.93083	0.06917		83.132	0.98082	0.01918		83.136	0.9516	0.0484		89.875	0.69804	0.30196		89.873	0.69487	0.30513		89.522	0.74918	0.25082
										90.132	0.68044	0.31956		90.128	0.77688	0.22312		90.131	0.84152	0.15848		90.131	0.89364	0.10636		90.131	0.93283	0.06717		83.369	0.97355	0.02645		83.373	0.98254	0.01746		90.131	0.70022	0.29978		90.13	0.69221	0.30779		89.778	0.74006	0.25994
										90.389	0.70633	0.29367		90.385	0.77762	0.22238		90.386	0.83691	0.16309		90.386	0.86197	0.13803		90.386	0.93217	0.06783		83.607	0.97576	0.02424		83.609	0.97879	0.02121		90.387	0.63063	0.36937		90.386	0.69733	0.30267		90.033	0.75149	0.24851
										90.644	0.68539	0.31461		90.64	0.77846	0.22154		90.642	0.8364	0.1636		90.642	0.86246	0.13754		90.642	0.93383	0.06617		83.843	0.97566	0.02434		83.847	0.96451	0.03549		90.642	0.59625	0.40375		90.642	0.70727	0.29273		90.288	0.75255	0.24745
										90.9	0.70781	0.29219		90.897	0.78604	0.21396		90.899	0.82706	0.17294		90.898	0.92164	0.07836		90.899	0.93282	0.06718		84.08	0.97174	0.02826		84.083	0.96882	0.03118		90.898	0.69598	0.30402		90.898	0.69005	0.30995		90.543	0.73498	0.26502
										91.156	0.66355	0.33645		91.153	0.78008	0.21992		91.155	0.82639	0.17361		91.154	0.88866	0.11134		91.155	0.92985	0.07015		84.316	0.97478	0.02522		84.321	0.96936	0.03064		91.155	0.6642	0.3358		91.154	0.67963	0.32037		90.798	0.74622	0.25378
										91.412	0.68401	0.31599		91.408	0.77876	0.22124		91.41	0.83415	0.16585		91.41	0.88603	0.11397		91.41	0.92776	0.07224		84.553	0.97674	0.02326		84.557	0.97704	0.02296		91.411	0.6983	0.3017		91.41	0.6701	0.3299		91.053	0.7263	0.2737
										91.668	0.71149	0.28851		91.665	0.78086	0.21914		91.666	0.83214	0.16786		91.666	0.83996	0.16004		91.667	0.93063	0.06937		84.79	0.9783	0.0217		84.794	0.96851	0.03149		91.667	0.6842	0.3158		91.666	0.69622	0.30378		91.308	0.71518	0.28482
										91.925	0.71058	0.28942		91.921	0.78757	0.21243		91.922	0.84362	0.15638		91.923	0.85182	0.14818		91.923	0.93029	0.06971		85.027	0.98031	0.01969		85.031	0.9816	0.0184		91.923	0.69415	0.30585		91.922	0.69997	0.30003		91.564	0.74777	0.25223
										92.18	0.68698	0.31302		92.177	0.78229	0.21771		92.179	0.82984	0.17016		92.178	0.89862	0.10138		92.179	0.93019	0.06981		85.263	0.96899	0.03101		85.267	0.96942	0.03058		92.178	0.70032	0.29968		92.178	0.6854	0.3146		91.818	0.70542	0.29458
										92.436	0.65902	0.34098		92.433	0.77202	0.22798		92.435	0.81697	0.18303		92.435	0.86555	0.13445		92.436	0.93377	0.06623		85.501	0.97253	0.02747		85.505	0.96619	0.03381		92.435	0.69624	0.30376		92.434	0.66985	0.33015		92.073	0.72199	0.27801
										92.693	0.69222	0.30778		92.689	0.77687	0.22313		92.69	0.83392	0.16608		92.691	0.84097	0.15903		92.691	0.9296	0.0704		85.738	0.98422	0.01578		85.743	0.98337	0.01663		92.691	0.69314	0.30686		92.69	0.69473	0.30527		92.328	0.71704	0.28296
										92.948	0.70295	0.29705		92.945	0.78448	0.21552		92.947	0.83319	0.16681		92.947	0.86637	0.13363		92.947	0.92645	0.07355		85.975	0.98104	0.01896		85.977	0.97973	0.02027		92.947	0.70481	0.29519		92.947	0.69439	0.30561		92.583	0.72848	0.27152
										93.204	0.68173	0.31827		93.201	0.77543	0.22457		93.203	0.83418	0.16582		93.203	0.83873	0.16127		93.203	0.93164	0.06836		86.211	0.98574	0.01426		86.215	0.97999	0.02001		93.203	0.72472	0.27528		93.202	0.70276	0.29724		92.839	0.72831	0.27169
										93.46	0.70901	0.29099		93.456	0.77896	0.22104		93.459	0.83668	0.16332		93.459	0.87338	0.12662		93.46	0.9285	0.0715		86.448	0.97981	0.02019		86.451	0.98164	0.01836		93.459	0.73369	0.26631		93.458	0.66549	0.33451		93.093	0.77068	0.22932
										93.717	0.68706	0.31294		93.712	0.77751	0.22249		93.715	0.8331	0.1669		93.715	0.85325	0.14675		93.716	0.92962	0.07038		86.685	0.9792	0.0208		86.688	0.96569	0.03431		93.715	0.64282	0.35718		93.715	0.66513	0.33487		93.349	0.73055	0.26945
										93.973	0.71918	0.28082		93.968	0.77444	0.22556		93.971	0.81673	0.18327		93.971	0.87603	0.12397		93.971	0.92791	0.07209		86.921	0.9761	0.0239		86.925	0.97878	0.02122		93.972	0.68207	0.31793		93.971	0.68759	0.31241		93.604	0.72748	0.27252
										94.228	0.70159	0.29841		94.225	0.78073	0.21927		94.228	0.82107	0.17893		94.227	0.86947	0.13053		94.228	0.93082	0.06918		87.159	0.97595	0.02405		87.162	0.98087	0.01913		94.227	0	1		94.226	0.69796	0.30204		93.859	0.73866	0.26134
										94.484	0.69174	0.30826		94.481	0.77217	0.22783		94.483	0.83704	0.16296		94.483	0.90048	0.09952		94.484	0.9318	0.0682		87.396	0.98127	0.01873		87.399	0.96904	0.03096		94.483	0.70421	0.29579		94.482	0.69035	0.30965		94.114	0.74252	0.25748
										94.741	0.68991	0.31009		94.737	0.77712	0.22288		94.739	0.84794	0.15206		94.739	0.86751	0.13249		94.739	0.92722	0.07278		87.632	0.97148	0.02852		87.636	0.97778	0.02222		94.739	0.67929	0.32071		94.739	0.68884	0.31116		94.368	0.74577	0.25423
										94.997	0.69349	0.30651		94.993	0.77332	0.22668		94.995	0.84262	0.15738		94.995	0.86594	0.13406		94.995	0.92914	0.07086		87.869	0.96651	0.03349		87.873	0.97611	0.02389		94.995	0.71225	0.28775		94.995	0.66594	0.33406		94.624	0.72949	0.27051
										95.253	0.69278	0.30722		95.248	0.77725	0.22275		95.251	1.01172	-0.01172		95.251	0.86603	0.13397		95.251	0.92878	0.07122		88.106	0.97578	0.02422		88.109	0.9708	0.0292		95.252	0.69142	0.30858		95.251	0.67847	0.32153		94.879	0.7237	0.2763
										95.509	0.67504	0.32496		95.505	0.77902	0.22098		95.508	1.01172	-0.01172		95.507	0.87499	0.12501		95.507	0.93177	0.06823		88.343	0.96942	0.03058		88.347	0.97463	0.02537		95.508	0.68313	0.31687		95.506	0.6725	0.3275		95.133	0.70022	0.29978
										95.764	0.6971	0.3029		95.761	0.76631	0.23369		95.764	1.01172	-0.01172		95.763	0.83652	0.16348		95.764	0.92954	0.07046		88.58	0.97402	0.02598		88.583	0.97694	0.02306		95.763	0.71326	0.28674		95.763	0.67089	0.32911		95.388	0.74586	0.25414
										96.02	0.69439	0.30561		96.017	0.77576	0.22424		96.019	0.84467	0.15533		96.02	0.87299	0.12701		96.02	0.92474	0.07526		88.816	0.97055	0.02945		88.82	0.97326	0.02674		96.019	0.68098	0.31902		96.019	0.68466	0.31534		95.643	0.74243	0.25757
										96.278	0.69581	0.30419		96.273	0.77008	0.22992		96.276	1.01172	-0.01172		96.276	0.87704	0.12296		96.275	0.92979	0.07021		89.054	0.97448	0.02552		89.057	0.97205	0.02795		96.275	0.68383	0.31617		96.275	0.66414	0.33586		95.899	0.71709	0.28291
										96.532	0.69936	0.30064		96.53	0.7734	0.2266		96.532	1.01172	-0.01172		96.531	0.87189	0.12811		96.532	0.93091	0.06909		89.29	0.9642	0.0358		89.293	0.97313	0.02687		96.531	0.65838	0.34162		96.531	0.68469	0.31531		96.154	0.65759	0.34241
										96.789	0.6635	0.3365		96.786	0.76703	0.23297		96.788	0.31409	0.68591		96.787	0.86121	0.13879		96.788	0.92671	0.07329		89.527	0.98058	0.01942		89.531	0.98206	0.01794		96.788	0.68512	0.31488		96.788	0.68407	0.31593		96.409	0.72579	0.27421
										97.045	0.68027	0.31973		97.042	0.76915	0.23085		97.044	0.82823	0.17177		97.043	0.86413	0.13587		97.044	0.92786	0.07214		89.765	0.97161	0.02839		89.767	0.97157	0.02843		97.044	0.68538	0.31462		97.044	0.6638	0.3362		96.664	0.74206	0.25794
										97.302	0.68889	0.31111		97.297	0.7756	0.2244		97.3				97.299	0.8706	0.1294		97.3	0.92714	0.07286		90.001	0.98031	0.01969		90.005	0.96167	0.03833		97.3	0.66607	0.33393		97.299	0.67087	0.32913		96.919	0.72023	0.27977
										97.557	0.69246	0.30754		97.553	0.76834	0.23166		97.556	1.01172	-0.01172		97.555	0.86805	0.13195		97.557	0.92461	0.07539		90.237	0.96766	0.03234		90.242	0.97892	0.02108		97.556	0.67736	0.32264		97.556	0.67108	0.32892		97.174	0.72298	0.27702
										97.813	0.67039	0.32961		97.809	0.75561	0.24439		97.813	1.01172	-0.01172		97.812	0.86155	0.13845		97.812	0.92597	0.07403		90.474	0.98324	0.01676		90.478	0.9748	0.0252		97.812	0.69799	0.30201		97.812	0.6696	0.3304		97.43	0.72127	0.27873
										98.069	0.6685	0.3315		98.066	0.77172	0.22828		98.068	0.7079	0.2921		98.067	0.86722	0.13278		98.068	0.92795	0.07205		90.712	0.97208	0.02792		90.716	0.96874	0.03126		98.068	0.68764	0.31236		98.067	0.67641	0.32359		97.685	0.72198	0.27802
										98.326	0.68433	0.31567		98.321	0.78183	0.21817		98.325	0.83208	0.16792		98.323	0.86849	0.13151		98.324	0.92607	0.07393		90.949	0.98006	0.01994		90.952	0.97956	0.02044		98.325	0.59086	0.40914		98.324	0.64862	0.35138		97.94	0.7227	0.2773
										98.581	0.69673	0.30327		98.578	0.77374	0.22626		98.581	1.01172	-0.01172		98.579	0.87547	0.12453		98.58	0.92675	0.07325		91.186	0.97853	0.02147		91.188	0.96724	0.03276		98.58	0.70662	0.29338		98.579	0.67957	0.32043		98.194	0.72029	0.27971
										98.838	0.69062	0.30938		98.834	0.76568	0.23432		98.836	1.01172	-0.01172		98.835	0.88275	0.11725		98.837	0.92428	0.07572		91.421	0.96338	0.03662		91.424	0.96814	0.03186		98.836	0.68104	0.31896		98.835	0.67741	0.32259		98.45	0.71801	0.28199
										99.094	0.68804	0.31196		99.089	0.76011	0.23989		99.093	0.81493	0.18507		99.092	0.85667	0.14333		99.092	0.92832	0.07168		91.658	0.97101	0.02899		91.661	0.97445	0.02555		99.092	0.64267	0.35733		99.091	0.67252	0.32748		98.705	0.73471	0.26529
										99.35	0.6529	0.3471		99.346	0.7653	0.2347		99.348	0.82542	0.17458		99.348	0.8751	0.1249		99.348	0.9276	0.0724		91.895	0.97079	0.02921		91.899	0.97484	0.02516		99.348	0.64489	0.35511		99.348	0.66797	0.33203		98.959	0.72534	0.27466
										99.606	0.67666	0.32334		99.602	0.77178	0.22822		99.604	0.91408	0.08592		99.604	0.86885	0.13115		99.605	0.92766	0.07234		92.132	0.96876	0.03124		92.136	0.96631	0.03369		99.604	0.68686	0.31314		99.603	0.67954	0.32046		99.215	0.71652	0.28348
										99.861	0.67104	0.32896		99.858	0.76554	0.23446		99.86	0.81695	0.18305		99.86	0.86162	0.13838		99.86	0.92141	0.07859		92.369	0.96668	0.03332		92.373	0.98009	0.01991		99.86	0.68143	0.31857		99.859	0.64935	0.35065		99.469	0.71957	0.28043
										100.118	0.68319	0.31681		100.114	0.77167	0.22833		100.117	0.82011	0.17989		100.116	0.8585	0.1415		100.116	0.92225	0.07775		92.606	0.97229	0.02771		92.608	0.96504	0.03496		100.117	0.68118	0.31882		100.116	0.66809	0.33191		99.724	0.71249	0.28751
										100.374	0.67357	0.32643		100.37	0.76188	0.23812		100.372	0.82078	0.17922		100.371	0.87487	0.12513		100.373	0.92668	0.07332		92.843	0.96679	0.03321		92.847	0.97386	0.02614		100.373	0.67026	0.32974		100.371	0.64639	0.35361		99.98	0.72355	0.27645
										100.629	0.68535	0.31465		100.626	0.76438	0.23562		100.628	0.8286	0.1714		100.628	0.87603	0.12397		100.629	0.92286	0.07714		93.081	0.96909	0.03091		93.083	0.97319	0.02681		100.629	0.32177	0.67823		100.627	0.65928	0.34072		100.234	0.73222	0.26778
										100.886	0.67706	0.32294		100.882	0.76957	0.23043		100.886	0.83279	0.16721		100.884	0.86618	0.13382		100.885	0.92438	0.07562		93.317	0.97721	0.02279		93.32	0.97877	0.02123		100.885	0.67344	0.32656		100.883	0.67494	0.32506		100.49	0.71869	0.28131
										101.142	0.6743	0.3257		101.138	0.7571	0.2429		101.142	0.81973	0.18027		101.14	0.85553	0.14447		101.141	0.92704	0.07296		93.554	0.97351	0.02649		93.558	0.98048	0.01952		101.141	0.64906	0.35094		101.14	0.67329	0.32671		100.745	0.69316	0.30684
										101.398	0.68518	0.31482		101.395	0.76042	0.23958		101.398	0.8238	0.1762		101.396	0.86446	0.13554		101.397	0.92541	0.07459		93.79	0.96716	0.03284		93.793	0.96969	0.03031		101.396	0.64572	0.35428		101.397	0.67086	0.32914		101	0.7151	0.2849
										101.655	0.63516	0.36484		101.65	0.75096	0.24904		101.654	0.78662	0.21338		101.652	0.86604	0.13396		101.653	0.92308	0.07692		94.027	0.97896	0.02104		94.031	0.97871	0.02129		101.652	0.53004	0.46996		101.652	0.68507	0.31493		101.255	0.71942	0.28058
										101.91	0.66037	0.33963		101.906	0.76388	0.23612		101.91	0.83	0.17		101.908	0.838	0.162		101.909	0.92127	0.07873		94.265	0.97227	0.02773		94.267	0.96287	0.03713		101.909	0.67552	0.32448		101.908	0.66792	0.33208		101.51	0.72993	0.27007
										102.167	0.6769	0.3231		102.162	0.76344	0.23656		102.166	0.80005	0.19995		102.165	0.86292	0.13708		102.165	0.92343	0.07657		94.502	0.98063	0.01937		94.505	0.96964	0.03036		102.165	0.83211	0.16789		102.164	0.66156	0.33844		101.765	0.70777	0.29223
										102.422	0.6808	0.3192		102.418	0.75559	0.24441		102.422	0.85883	0.14117		102.42	0.86031	0.13969		102.421	0.92232	0.07768		94.737	0.9661	0.0339		94.741	0.9745	0.0255		102.421	0.69214	0.30786		102.421	0.66594	0.33406		102.02	0.71633	0.28367
										102.678	0.67888	0.32112		102.675	0.77288	0.22712		102.678	0.8985	0.1015		102.677	0.8633	0.1367		102.677	0.93012	0.06988		94.974	0.97066	0.02934		94.978	0.96993	0.03007		102.677	0.66453	0.33547		102.676	0.65866	0.34134		102.275	0.67906	0.32094
										102.934	0.65431	0.34569		102.93	0.75203	0.24797		102.934				102.932	0.86207	0.13793		102.933	0.92185	0.07815		95.211	0.97598	0.02402		95.214	0.97324	0.02676		102.933	0.73112	0.26888		102.932	0.6592	0.3408		102.53	0.72427	0.27573
										103.19	0.67313	0.32687		103.187	0.77658	0.22342		103.19	0.91409	0.08591		103.189	0.86172	0.13828		103.189	0.92451	0.07549		95.449	0.96697	0.03303		95.451	0.96088	0.03912		103.189	0.66074	0.33926		103.188	0.69632	0.30368		102.786	0.73365	0.26635
										103.447	0.68332	0.31668		103.443	0.76768	0.23232		103.446				103.444	0.86168	0.13832		103.445	0.92499	0.07501		95.685	0.96973	0.03027		95.689	0.96689	0.03311		103.445	0.67306	0.32694		103.445	0.63895	0.36105		103.041	0.70842	0.29158
										103.702	0.69742	0.30258		103.699	0.7592	0.2408		103.703	0.81347	0.18653		103.7	0.83612	0.16388		103.701	0.91998	0.08002		95.923	0.96955	0.03045		95.926	0.95472	0.04528		103.701	0.68267	0.31733		103.701	0.67652	0.32348		103.296	0.72657	0.27343
										103.959	0.68	0.32		103.954	0.77213	0.22787		103.958	0.80982	0.19018		103.957	0.87321	0.12679		103.958	0.92341	0.07659		96.158	0.97022	0.02978		96.161	0.97129	0.02871		103.957	0.65087	0.34913		103.956	0.663	0.337		103.55	0.72007	0.27993
										104.215	0.65799	0.34201		104.211	0.75426	0.24574		104.214	0.81874	0.18126		104.213	0.85043	0.14957		104.214	0.92649	0.07351		96.396	0.97621	0.02379		96.399	0.96889	0.03111		104.213	0.66586	0.33414		104.212	0.66476	0.33524		103.805	0.72079	0.27921
										104.47	0.68661	0.31339		104.466	0.76194	0.23806		104.471	0.96426	0.03574		104.47	0.85907	0.14093		104.469	0.92536	0.07464		96.633	0.96824	0.03176		96.636	0.98411	0.01589		104.469	0.66448	0.33552		104.468	0.65603	0.34397		104.06	0.69725	0.30275
										104.726	0.63649	0.36351		104.722	0.74491	0.25509		104.726	0.80974	0.19026		104.725	0.85943	0.14057		104.726	0.92183	0.07817		96.869	0.95792	0.04208		96.873	0.96397	0.03603		104.725	0.66736	0.33264		104.725	0.64803	0.35197		104.315	0.72092	0.27908
										104.983	0.68015	0.31985		104.978	0.75687	0.24313		104.983	0.8139	0.1861		104.981	0.87206	0.12794		104.982	0.92394	0.07606		97.107	0.97867	0.02133		97.11	0.97529	0.02471		104.981	0.66837	0.33163		104.98	0.66769	0.33231		104.57	0.72693	0.27307
										105.239	0.68417	0.31583		105.235	0.75844	0.24156		105.239	0.80964	0.19036		105.237	0.86463	0.13537		105.238	0.92717	0.07283		97.343	0.97689	0.02311		97.346	0.97536	0.02464		105.237	0.67701	0.32299		105.237	0.66115	0.33885		104.825	0.68818	0.31182
										105.495	0.69146	0.30854		105.491	0.74955	0.25045		105.494	0.8253	0.1747		105.493	0.85291	0.14709		105.493	0.91923	0.08077		97.579	0.97166	0.02834		97.583	0.97015	0.02985		105.493	0.5631	0.4369		105.493	0.68402	0.31598		105.081	0.71979	0.28021
										105.751	0.65352	0.34648		105.747	0.75134	0.24866		105.75	0.83035	0.16965		105.749	0.87228	0.12772		105.75	0.92186	0.07814		97.818	0.97248	0.02752		97.82	0.97539	0.02461		105.75	0.65006	0.34994		105.749	0.66735	0.33265		105.335	0.73751	0.26249
										106.007	0.66047	0.33953		106.003	0.76393	0.23607		106.006	0.82072	0.17928		106.006	0.8543	0.1457		106.005	0.92321	0.07679		98.054	0.96914	0.03086		98.056	0.97338	0.02662		106.006	0.81741	0.18259		106.005	0.65917	0.34083		105.591	0.70054	0.29946
										106.263	0.63782	0.36218		106.259	0.74428	0.25572		106.263	0.82428	0.17572		106.262	0.85979	0.14021		106.261	0.92674	0.07326		98.291	0.97155	0.02845		98.294	0.96457	0.03543		106.261	0.59059	0.40941		106.26	0.65401	0.34599		105.846	0.69243	0.30757
										106.519	0.67579	0.32421		106.516	0.7558	0.2442		106.519	0.77104	0.22896		106.517	0.84104	0.15896		106.518	0.92345	0.07655		98.527	0.97123	0.02877		98.53	0.97794	0.02206		106.517	0.6536	0.3464		106.517	0.69979	0.30021		106.102	0.70643	0.29357
										106.775	0.67466	0.32534		106.771	0.7621	0.2379		106.775	0.68318	0.31682		106.773	0.85854	0.14146		106.774	0.92034	0.07966		98.764	0.96885	0.03115		98.768	0.9684	0.0316		106.774	0.75223	0.24777		106.772	0.6518	0.3482		106.356	0.67101	0.32899
										107.031	0.66351	0.33649		107.027	0.7457	0.2543		107.032	0.81432	0.18568		107.029	0.8592	0.1408		107.029	0.9223	0.0777		99.001	0.975	0.025		99.004	0.98234	0.01766		107.029	0.67127	0.32873		107.028	0.62402	0.37598		106.611	0.7114	0.2886
										107.287	0.66417	0.33583		107.283	0.76021	0.23979		107.288	0.81867	0.18133		107.285	0.86222	0.13778		107.285	0.92405	0.07595		99.238	0.96556	0.03444		99.242	0.97403	0.02597		107.286	0.66407	0.33593		107.285	0.62937	0.37063		106.866	0.70962	0.29038
										107.543	0.67204	0.32796		107.539	0.76971	0.23029		107.544	0.79221	0.20779		107.541	0.85074	0.14926		107.542	0.92007	0.07993		99.475	0.97243	0.02757		99.478	0.96064	0.03936		107.541	0.49782	0.50218		107.541	0.67483	0.32517		107.121	0.70118	0.29882
										107.799	0.69384	0.30616		107.795	0.75558	0.24442		107.8	0.81574	0.18426		107.797	0.84904	0.15096		107.798	0.92051	0.07949		99.711	0.97997	0.02003		99.714	0.988	0.012		107.798	0.6157	0.3843		107.798	0.69365	0.30635		107.376	0.71935	0.28065
										108.055	0.66205	0.33795		108.051	0.75282	0.24718		108.055	0.8285	0.1715		108.053	0.85162	0.14838		108.053	0.92158	0.07842		99.948	0.97053	0.02947		99.951	0.97509	0.02491		108.053	0.67387	0.32613		108.053	0.66335	0.33665		107.631	0.7294	0.2706
										108.312	0.65813	0.34187		108.307	0.7645	0.2355		108.312	0.79239	0.20761		108.309	0.86028	0.13972		108.31	0.91977	0.08023		100.186	0.96996	0.03004		100.188	0.97866	0.02134		108.31	0.66308	0.33692		108.309	0.65434	0.34566		107.887	0.71455	0.28545
										108.567	0.67617	0.32383		108.564	0.76173	0.23827		108.568	0.81409	0.18591		108.565	0.84694	0.15306		108.566	0.92461	0.07539		100.422	0.97181	0.02819		100.425	0.97098	0.02902		108.566	0.66169	0.33831		108.565	0.723	0.277		108.142	0.72362	0.27638
										108.823	0.67135	0.32865		108.819	0.75005	0.24995		108.824	0.7989	0.2011		108.821	0.85043	0.14957		108.822	0.92155	0.07845		100.659	0.96629	0.03371		100.662	0.95946	0.04054		108.822	0.67889	0.32111		108.822	0.65641	0.34359		108.396	0.7167	0.2833
										109.08	0.65991	0.34009		109.075	0.75944	0.24056		109.08	0.81345	0.18655		109.077	0.84227	0.15773		109.078	0.92171	0.07829		100.896	0.97446	0.02554		100.899	0.96517	0.03483		109.077	0.63478	0.36522		109.077	0.66154	0.33846		108.652	0.72085	0.27915
										109.336	0.64489	0.35511		109.332	0.75847	0.24153		109.337	0.82188	0.17812		109.334	0.86051	0.13949		109.334	0.92106	0.07894		101.132	0.94461	0.05539		101.136	0.9377	0.0623		109.334	0.65506	0.34494		109.333	0.67507	0.32493		108.906	0.7049	0.2951
										109.591	0.67502	0.32498		109.588	0.74551	0.25449		109.592	0.80506	0.19494		109.589	0.85294	0.14706		109.59	0.92147	0.07853		101.37	0.95155	0.04845		101.372	0.97278	0.02722		109.59	0.64092	0.35908		109.589	0.61932	0.38068		109.162	0.70115	0.29885
										109.848	0.64608	0.35392		109.844	0.76339	0.23661		109.849	0.81244	0.18756		109.845	0.82707	0.17293		109.846	0.92304	0.07696		101.607	0.96549	0.03451		101.61	0.97748	0.02252		109.846	0.66862	0.33138		109.845	0.66033	0.33967		109.416	0.69498	0.30502
										110.103	0.64579	0.35421		110.1	0.76638	0.23362		110.104	0.80573	0.19427		110.102	0.84759	0.15241		110.103	0.92093	0.07907		101.844	0.9621	0.0379		101.847	0.96678	0.03322		110.102	0.64163	0.35837		110.102	0.65794	0.34206		109.671	0.70203	0.29797
										110.359	0.67138	0.32862		110.355	0.7369	0.2631		110.361	0	1		110.357	0.84505	0.15495		110.359	0.91903	0.08097		102.081	0.97405	0.02595		102.083	0.96653	0.03347		110.358	0.67037	0.32963		110.358	0.65858	0.34142		109.927	0.72157	0.27843
										110.616	0.64699	0.35301		110.612	0.76161	0.23839		110.617				110.614	0.85877	0.14123		110.614	0.91968	0.08032		102.317	0.96093	0.03907		102.32	0.96656	0.03344		110.615	0.6157	0.3843		110.614	0.64937	0.35063		110.182	0.71539	0.28461
										110.872	0.6666	0.3334		110.868	0.76072	0.23928		110.873	0.80317	0.19683		110.87	0.85896	0.14104		110.871	0.91926	0.08074		102.553	0.97032	0.02968		102.557	0.96597	0.03403		110.87	0.65346	0.34654		110.869	0.64275	0.35725		110.436	0.69815	0.30185
										111.128	0.66398	0.33602		111.125	0.74483	0.25517		111.129	0.81167	0.18833		111.126	0.8559	0.1441		111.126	0.92133	0.07867		102.791	0.97255	0.02745		102.794	0.96025	0.03975		111.126	0.65304	0.34696		111.126	0.64555	0.35445		110.692	0.69918	0.30082
										111.384	0.66037	0.33963		111.38	0.74358	0.25642		111.385	0.80069	0.19931		111.382	0.85884	0.14116		111.383	0.91981	0.08019		103.028	0.97124	0.02876		103.031	0.96939	0.03061		111.382	0.65398	0.34602		111.382	0.65064	0.34936		110.947	0.71026	0.28974
										111.64	0.65154	0.34846		111.636	0.75236	0.24764		111.64	0.81102	0.18898		111.638	0.84278	0.15722		111.638	0.91383	0.08617		103.265	0.97082	0.02918		103.268	0.97269	0.02731		111.639	0.66041	0.33959		111.637	0.65719	0.34281		111.202	0.71477	0.28523
										111.896	0.6568	0.3432		111.893	0.73904	0.26096		111.897	0.79836	0.20164		111.894	0.84742	0.15258		111.895	0.92228	0.07772		103.501	0.96921	0.03079		103.505	0.96957	0.03043		111.895	0.64421	0.35579		111.893	0.64764	0.35236		111.457	0.71143	0.28857
										112.152	0.66543	0.33457		112.149	0.74395	0.25605		112.152	0.79946	0.20054		112.15	0.84108	0.15892		112.151	0.91869	0.08131		103.738	0.95807	0.04193		103.741	0.96033	0.03967		112.151	0.55525	0.44475		112.15	0.64037	0.35963		111.712	0.69876	0.30124
										112.408	0.66466	0.33534		112.404	0.75685	0.24315		112.408	0.62039	0.37961		112.407	0.85083	0.14917		112.407	0.91576	0.08424		103.975	0.96357	0.03643		103.978	0.97261	0.02739		112.407	0.65567	0.34433		112.406	0.67525	0.32475		111.967	0.71033	0.28967
										112.664	0.68856	0.31144		112.66	0.72975	0.27025		112.665	1.01172	-0.01172		112.662	0.84851	0.15149		112.662	0.92023	0.07977		104.213	0.96871	0.03129		104.215	0.97331	0.02669		112.663	0.65688	0.34312		112.662	0.64785	0.35215		112.222	0.69641	0.30359
										112.92	0.65393	0.34607		112.917	0.75211	0.24789		112.921	1.01172	-0.01172		112.919	0.8478	0.1522		112.919	0.91896	0.08104		104.45	0.9724	0.0276		104.451	0.97787	0.02213		112.918	0.65907	0.34093		112.918	0.63901	0.36099		112.477	0.70996	0.29004
										113.176	0.63827	0.36173		113.172	0.73553	0.26447		113.177	0.81353	0.18647		113.175	0.8574	0.1426		113.174	0.91547	0.08453		104.685	0.98017	0.01983		104.689	0.97507	0.02493		113.175	0.64144	0.35856		113.174	0.63703	0.36297		112.733	0.70336	0.29664
										113.433	0.64996	0.35004		113.428	0.75506	0.24494		113.433				113.43	0.83971	0.16029		113.431	0.91708	0.08292		104.922	0.97189	0.02811		104.925	0.96668	0.03332		113.43	0.64944	0.35056		113.43	0.64968	0.35032		112.987	0.71184	0.28816
										113.688	0.64798	0.35202		113.684	0.74982	0.25018		113.689				113.686	0.83679	0.16321		113.687	0.91747	0.08253		105.159	0.97135	0.02865		105.162	0.96599	0.03401		113.687	0.65496	0.34504		113.686	0.64105	0.35895		113.242	0.71094	0.28906
										113.944	0.65382	0.34618		113.94	0.75311	0.24689		113.944	0.78785	0.21215		113.942	0.85476	0.14524		113.943	0.91181	0.08819		105.396	0.96727	0.03273		105.399	0.96654	0.03346		113.943	0.65638	0.34362		113.942	0.64569	0.35431		113.497	0.70799	0.29201
										114.2	0.65277	0.34723		114.196	0.74416	0.25584		114.2				114.198	0.84826	0.15174		114.199	0.91779	0.08221		105.633	0.9727	0.0273		105.637	0.9538	0.0462		114.199	0.63512	0.36488		114.199	0.63652	0.36348		113.752	0.7083	0.2917
										114.456	0.65462	0.34538		114.453	0.73685	0.26315		114.457	1.01172	-0.01172		114.455	0.82753	0.17247		114.455	0.91565	0.08435		105.869	0.9682	0.0318		105.873	0.96466	0.03534		114.455	0.65548	0.34452		114.454	0.63068	0.36932		114.007	0.69806	0.30194
										114.713	0.64305	0.35695		114.708	0.73914	0.26086		114.714	0.7985	0.2015		114.711	0.85717	0.14283		114.712	0.91968	0.08032		106.106	0.96845	0.03155		106.109	0.96606	0.03394		114.711	0.64145	0.35855		114.711	0.63942	0.36058		114.263	0.69532	0.30468
										114.968	0.62834	0.37166		114.965	0.74102	0.25898		114.969	0.80425	0.19575		114.966	0.83358	0.16642		114.967	0.91875	0.08125		106.343	0.95848	0.04152		106.346	0.96733	0.03267		114.968	0.62641	0.37359		114.967	0.65751	0.34249		114.518	0.75813	0.24187
										115.224	0.63627	0.36373		115.222	0.74227	0.25773		115.225	0.30517	0.69483		115.223	0.85361	0.14639		115.223	0.91765	0.08235		106.581	0.96605	0.03395		106.583	0.98133	0.01867		115.223	0.65126	0.34874		115.223	0.62961	0.37039		114.772	0.69322	0.30678
										115.481	0.68291	0.31709		115.477	0.74197	0.25803		115.481	0.80831	0.19169		115.479	0.84332	0.15668		115.479	0.91456	0.08544		106.818	0.97852	0.02148		106.82	0.96474	0.03526		115.479	0.65291	0.34709		115.479	0.66655	0.33345		115.027	0.69115	0.30885
										115.737	0.65778	0.34222		115.732	0.73682	0.26318		115.738	0.80473	0.19527		115.735	0.86245	0.13755		115.735	0.91512	0.08488		107.055	0.97506	0.02494		107.057	0.96884	0.03116		115.735	0.63137	0.36863		115.735	0.64148	0.35852		115.282	0.70732	0.29268
										115.993	0.63671	0.36329		115.988	0.7373	0.2627		115.993	0.78465	0.21535		115.99	0.84024	0.15976		115.992	0.91725	0.08275		107.292	0.97245	0.02755		107.294	0.96285	0.03715		115.992	0.63461	0.36539		115.99	0.60028	0.39972		115.537	0.70353	0.29647
										116.248	0.66268	0.33732		116.245	0.75781	0.24219		116.25	0.77117	0.22883		116.247	0.84487	0.15513		116.247	0.91457	0.08543		107.528	0.97325	0.02675		107.531	0.97364	0.02636		116.247	0.65582	0.34418		116.247	0.66984	0.33016		115.792	0.70786	0.29214
										116.504	0.6601	0.3399		116.502	0.73892	0.26108		116.506	0.79625	0.20375		116.503	0.84617	0.15383		116.504	0.91419	0.08581		107.765	0.97628	0.02372		107.768	0.9663	0.0337		116.504	0.65429	0.34571		116.503	0.63525	0.36475		116.047	0.71331	0.28669
										116.761	0.62793	0.37207		116.757	0.73589	0.26411		116.761	0.80141	0.19859		116.759	0.84639	0.15361		116.759	0.91276	0.08724		108.002	0.9663	0.0337		108.005	0.9712	0.0288		116.76	0.6584	0.3416		116.759	0.64626	0.35374		116.303	0.69602	0.30398
										117.016	0.60232	0.39768		117.013	0.74835	0.25165		117.018	0.79659	0.20341		117.016	0.85218	0.14782		117.016	0.91245	0.08755		108.239	0.98127	0.01873		108.241	0.96733	0.03267		117.015	0.67234	0.32766		117.015	0.64292	0.35708		116.558	0.69182	0.30818
										117.273	0.65743	0.34257		117.269	0.74722	0.25278		117.273	0.78743	0.21257		117.271	0.84076	0.15924		117.271	0.91342	0.08658		108.475	0.9707	0.0293		108.478	0.96705	0.03295		117.272	0.65013	0.34987		117.271	0.63049	0.36951		116.813	0.70047	0.29953
										117.529	0.64831	0.35169		117.525	0.73809	0.26191		117.529	0.79605	0.20395		117.527	0.85152	0.14848		117.527	0.9149	0.0851		108.712	0.96168	0.03832		108.715	0.95923	0.04077		117.528	0.65942	0.34058		117.527	0.64577	0.35423		117.068	0.69356	0.30644
										117.785	0.62004	0.37996		117.781	0.73579	0.26421		117.786	0.7958	0.2042		117.784	0.85737	0.14263		117.784	0.91728	0.08272		108.949	0.97561	0.02439		108.953	0.95723	0.04277		117.784	0.64861	0.35139		117.782	0.64751	0.35249		117.322	0.69421	0.30579
										118.041	0.65708	0.34292		118.038	0.73497	0.26503		118.041	0	1		118.039	0.84807	0.15193		118.04	0.91325	0.08675		109.186	0.97516	0.02484		109.189	0.97616	0.02384		118.04	0.63938	0.36062		118.039	0.61807	0.38193		117.578	0.68952	0.31048
										118.297	0.63033	0.36967		118.293	0.73988	0.26012		118.298	1.01172	-0.01172		118.295	0.83243	0.16757		118.296	0.9139	0.0861		109.423	0.93879	0.06121		109.426	0.98051	0.01949		118.296	0.6422	0.3578		118.295	0.6269	0.3731		117.833	0.69029	0.30971
										118.553	0.673	0.327		118.549	0.73564	0.26436		118.554	0.80317	0.19683		118.552	0.83683	0.16317		118.553	0.91336	0.08664		109.66	0.96404	0.03596		109.662	0.96535	0.03465		118.552	0.57435	0.42565		118.551	0.6576	0.3424		118.088	0.69154	0.30846
										118.809	0.65221	0.34779		118.806	0.74248	0.25752		118.81	0.76352	0.23648		118.807	0.84437	0.15563		118.809	0.91064	0.08936		109.896	0.97291	0.02709		109.9	0.97107	0.02893		118.808	0.64891	0.35109		118.807	0.67656	0.32344		118.343	0.68897	0.31103
										119.065	0.64754	0.35246		119.061	0.74159	0.25841		119.066	0.79778	0.20222		119.063	0.84258	0.15742		119.065	0.91564	0.08436		110.134	0.96005	0.03995		110.137	0.95996	0.04004		119.064	0.60033	0.39967		119.063	0.66489	0.33511		118.599	0.69226	0.30774
										119.321	0.62738	0.37262		119.317	0.73954	0.26046		119.323	0.65495	0.34505		119.319	0.82493	0.17507		119.321	0.91061	0.08939		110.371	0.97388	0.02612		110.373	0.96117	0.03883		119.32	0.63773	0.36227		119.319	0.62454	0.37546		118.853	0.69025	0.30975
										119.577	0.65884	0.34116		119.574	0.72434	0.27566		119.578	0.79813	0.20187		119.575	0.7996	0.2004		119.577	0.91414	0.08586		110.608	0.96149	0.03851		110.609	0.96885	0.03115		119.577	0.64347	0.35653		119.575	0.62256	0.37744		119.108	0.6949	0.3051
										119.834	0.64228	0.35772		119.829	0.73346	0.26654		119.833	0.79952	0.20048		119.832	0.8381	0.1619		119.834	0.91338	0.08662		110.844	0.9701	0.0299		110.846	0.97202	0.02798		119.832	0.66181	0.33819		119.831	0.63945	0.36055		119.364	0.68503	0.31497
										120.089	0.63257	0.36743		120.086	0.73387	0.26613		120.091	0.76123	0.23877		120.087	0.84363	0.15637		120.089	0.91152	0.08848		111.08	0.9771	0.0229		111.083	0.98174	0.01826		120.088	0.64858	0.35142		120.087	0.63138	0.36862		119.619	0.68094	0.31906
										120.346	0.65006	0.34994		120.342	0.73042	0.26958		120.346	0.79347	0.20653		120.344	0.83942	0.16058		120.345	0.91577	0.08423		111.318	0.96215	0.03785		111.32	0.96352	0.03648		120.344	0.64021	0.35979		120.344	0.64147	0.35853		119.873	0.69749	0.30251
										120.602	0.64298	0.35702		120.597	0.72841	0.27159		120.603	0.7868	0.2132		120.6	0.84635	0.15365		120.601	0.91046	0.08954		111.554	0.97097	0.02903		111.558	0.96381	0.03619		120.6	0.65974	0.34026		120.599	0.63672	0.36328		120.128	0.70032	0.29968
										120.857	0.6576	0.3424		120.854	0.73401	0.26599		120.858	0.79236	0.20764		120.855	0.84715	0.15285		120.857	0.91658	0.08342		111.792	0.96972	0.03028		111.794	0.96523	0.03477		120.856	0.5014	0.4986		120.856	0.6352	0.3648		120.383	0.67717	0.32283
										121.114	0.63103	0.36897		121.11	0.72975	0.27025		121.114	0.78094	0.21906		121.111	0.84549	0.15451		121.114	0.90816	0.09184		112.028	0.96744	0.03256		112.031	0.96724	0.03276		121.112	0.62615	0.37385		121.112	0.62756	0.37244		120.638	0.66872	0.33128
										121.369	0.65726	0.34274		121.365	0.73968	0.26032		121.371	0.79693	0.20307		121.368	0.83604	0.16396		121.37	0.91677	0.08323		112.266	0.97181	0.02819		112.267	0.96104	0.03896		121.368	0.63128	0.36872		121.368	0.64325	0.35675		120.894	0.69505	0.30495
										121.625	0.63224	0.36776		121.622	0.71917	0.28083		121.626	0.87001	0.12999		121.624	0.84251	0.15749		121.625	0.91683	0.08317		112.502	0.96237	0.03763		112.505	0.97859	0.02141		121.624	0.68951	0.31049		121.624	0.61965	0.38035		121.149	0.69395	0.30605
										121.882	0.63028	0.36972		121.878	0.73416	0.26584		121.882	0.77814	0.22186		121.879	0.7426	0.2574		121.882	0.91392	0.08608		112.738	0.96468	0.03532		112.741	0.96986	0.03014		121.88	0.63686	0.36314		121.879	0.61983	0.38017		121.404	0.68103	0.31897
										122.137	0.66082	0.33918		122.135	0.72795	0.27205		122.138				122.136	0.84667	0.15333		122.137	0.91613	0.08387		112.976	0.97352	0.02648		112.978	0.97644	0.02356		122.137	0.64434	0.35566		122.136	0.64527	0.35473		121.658	0.69784	0.30216
										122.393	0.60236	0.39764		122.389	0.72855	0.27145		122.395	0.78406	0.21594		122.392	0.84596	0.15404		122.393	0.90968	0.09032		113.212	0.96298	0.03702		113.215	0.96989	0.03011		122.392	1.01172	-0.01172		122.392	0.62825	0.37175		121.913	0.69231	0.30769
										122.649	0.64758	0.35242		122.646	0.73138	0.26862		122.65	0.77156	0.22844		122.648	0.83927	0.16073		122.65	0.91274	0.08726		113.448	0.97082	0.02918		113.451	0.97569	0.02431		122.648	0.64075	0.35925		122.648	0.60523	0.39477		122.169	0.68132	0.31868
										122.906	0.64423	0.35577		122.902	0.73581	0.26419		122.906	0.79862	0.20138		122.905	0.83011	0.16989		122.907	0.91135	0.08865		113.685	0.96195	0.03805		113.689	0.97278	0.02722		122.905	0.6369	0.3631		122.904	0.65989	0.34011		122.424	0.68081	0.31919
										123.161	0.6474	0.3526		123.159	0.72776	0.27224		123.163	0.7811	0.2189		123.16	0.8375	0.1625		123.162	0.91096	0.08904		113.923	0.93391	0.06609		113.927	0.97089	0.02911		123.16	0.64524	0.35476		123.16	0.63483	0.36517		122.678	0.70234	0.29766
										123.418	0.67545	0.32455		123.414	0.72522	0.27478		123.419	0.80155	0.19845		123.416	0.83535	0.16465		123.417	0.90945	0.09055		114.16	0.98243	0.01757		114.161	0.96703	0.03297		123.416	0.6969	0.3031		123.416	0.62857	0.37143		122.934	0.68346	0.31654
										123.674	0.66958	0.33042		123.67	0.7339	0.2661		123.675	0.54361	0.45639		123.673	0.84952	0.15048		123.674	0.90793	0.09207		114.397	0.96094	0.03906		114.4	0.977	0.023		123.673	0.63364	0.36636		123.673	0.71027	0.28973		123.19	0.67622	0.32378
										123.93	0.63961	0.36039		123.927	0.71473	0.28527		123.931	0.73748	0.26252		123.928	0.84863	0.15137		123.93	0.91083	0.08917		114.633	0.96771	0.03229		114.636	0.95842	0.04158		123.929	0.60171	0.39829		123.928	0.65847	0.34153		123.444	0.67065	0.32935
										124.186	0.64139	0.35861		124.183	0.7324	0.2676		124.187	0.7887	0.2113		124.184	0.83673	0.16327		124.186	0.91001	0.08999		114.87	0.96368	0.03632		114.873	0.97661	0.02339		124.184	0.6502	0.3498		124.184	0.64806	0.35194		123.699	0.65586	0.34414
										124.443	0.65684	0.34316		124.438	0.73472	0.26528		124.443	0.79204	0.20796		124.44	0.84151	0.15849		124.442	0.90461	0.09539		115.108	0.96633	0.03367		115.111	0.96426	0.03574		124.441	0.64211	0.35789		124.44	0.61889	0.38111		123.954	0.70353	0.29647
										124.698	0.65901	0.34099		124.695	0.72006	0.27994		124.698	0.80443	0.19557		124.696	0.84707	0.15293		124.699	0.90864	0.09136		115.344	0.97152	0.02848		115.347	0.9685	0.0315		124.697	0.66248	0.33752		124.697	0.66266	0.33734		124.209	0.6671	0.3329
										124.954	0.61882	0.38118		124.95	0.7327	0.2673		124.955	0.78585	0.21415		124.953	0.84229	0.15771		124.954	0.91018	0.08982		115.58	0.97066	0.02934		115.584	0.97432	0.02568		124.953	0.63251	0.36749		124.953	0.64117	0.35883		124.465	0.68988	0.31012
										125.21	0.66519	0.33481		125.206	0.71759	0.28241		125.211	0.79303	0.20697		125.209	0.84305	0.15695		125.21	0.90573	0.09427		115.817	0.96491	0.03509		115.82	0.96569	0.03431		125.209	0.42042	0.57958		125.208	0.61805	0.38195		124.719	0.62948	0.37052
										125.467	0.64442	0.35558		125.463	0.71655	0.28345		125.467	0.78806	0.21194		125.464	0.83793	0.16207		125.466	0.9108	0.0892		116.054	0.96282	0.03718		116.058	0.97169	0.02831		125.465	0.62637	0.37363		125.464	0.62618	0.37382		124.975	0.62733	0.37267
										125.723	0.62698	0.37302		125.718	0.71916	0.28084		125.723	0.80444	0.19556		125.721	0.84074	0.15926		125.723	0.90875	0.09125		116.291	0.97755	0.02245		116.294	0.96902	0.03098		125.721	0.64817	0.35183		125.72	0.62644	0.37356		125.229	0.67812	0.32188
										125.979	0.66051	0.33949		125.974	0.7277	0.2723		125.979	0.8038	0.1962		125.977	0.84398	0.15602		125.979	0.91294	0.08706		116.528	0.96001	0.03999		116.531	0.96517	0.03483		125.978	0.60677	0.39323		125.976	0.63075	0.36925		125.485	0.66715	0.33285
										126.235	0.65841	0.34159		126.23	0.72291	0.27709		126.235	0.7979	0.2021		126.232	0.84468	0.15532		126.234	0.91005	0.08995		116.765	0.97933	0.02067		116.769	0.96241	0.03759		126.234	0.47978	0.52022		126.232	0.62764	0.37236		125.74	0.69658	0.30342
										126.49	0.65374	0.34626		126.487	0.72785	0.27215		126.491	0.7898	0.2102		126.489	0.83041	0.16959		126.49	0.91082	0.08918		117.002	0.95643	0.04357		117.006	0.96094	0.03906		126.489	0.62979	0.37021		126.488	0.59674	0.40326		125.995	0.68965	0.31035
										126.746	0.652	0.348		126.743	0.71641	0.28359		126.747	0.95508	0.04492		126.746	0.83504	0.16496		126.746	0.91253	0.08747		117.239	0.96016	0.03984		117.242	0.96896	0.03104		126.745	0.62517	0.37483		126.744	0.62578	0.37422		126.25	0.69024	0.30976
										127.002	0.62041	0.37959		126.999	0.72463	0.27537		127.003	0.77198	0.22802		127.001	0.82499	0.17501		127.002	0.91106	0.08894		117.476	0.96502	0.03498		117.478	0.95546	0.04454		127.002	0.62711	0.37289		127.001	0.62273	0.37727		126.504	0.69059	0.30941
										127.259	0.64242	0.35758		127.255	0.72425	0.27575		127.26	0.75189	0.24811		127.257	0.82834	0.17166		127.259	0.90512	0.09488		117.712	0.9675	0.0325		117.715	0.96449	0.03551		127.257	0.67137	0.32863		127.257	0.62648	0.37352		126.76	0.68079	0.31921
										127.514	0.6527	0.3473		127.511	0.72194	0.27806		127.515	0.78648	0.21352		127.513	0.83155	0.16845		127.515	0.9074	0.0926		117.948	0.96204	0.03796		117.953	0.97084	0.02916		127.513	0.73992	0.26008		127.513	0.63538	0.36462		127.015	0.66573	0.33427
										127.77	0.63126	0.36874		127.767	0.7276	0.2724		127.772	0.74904	0.25096		127.769	0.85493	0.14507		127.771	0.90665	0.09335		118.185	0.96182	0.03818		118.19	0.97489	0.02511		127.77	0.61539	0.38461		127.769	0.6268	0.3732		127.27	0.68355	0.31645
										128.027	0.6505	0.3495		128.023	0.71638	0.28362		128.028	0.76159	0.23841		128.026	0.7508	0.2492		128.027	0.90661	0.09339		118.423	0.96837	0.03163		118.426	0.95672	0.04328		128.026	0.63712	0.36288		128.025	0.61471	0.38529		127.525	0.6831	0.3169
										128.283	0.61553	0.38447		128.28	0.73446	0.26554		128.284	0.78893	0.21107		128.281	0.84014	0.15986		128.282	0.90817	0.09183		118.659	0.96456	0.03544		118.663	0.94648	0.05352		128.282	0.63605	0.36395		128.282	0.61984	0.38016		127.78	0.68732	0.31268
										128.539	0.62313	0.37687		128.536	0.72024	0.27976		128.539	0.77586	0.22414		128.537	0.84224	0.15776		128.539	0.90848	0.09152		118.897	0.95914	0.04086		118.899	0.96258	0.03742		128.538	0.66093	0.33907		128.537	0.63696	0.36304		128.035	0.68265	0.31735
										128.795	0.65191	0.34809		128.792	0.70953	0.29047		128.795	0.78965	0.21035		128.793	0.84541	0.15459		128.795	0.90587	0.09413		119.133	0.97339	0.02661		119.137	0.96922	0.03078		128.793	0.62027	0.37973		128.793	0.60632	0.39368		128.29	0.77949	0.22051
										129.051	0.64262	0.35738		129.048	0.71363	0.28637		129.052	0.77659	0.22341		129.049	0.83561	0.16439		129.05	0.90987	0.09013		119.37	0.96693	0.03307		119.374	0.98	0.02		129.05	0.58013	0.41987		129.049	0.63091	0.36909		128.545	0.66853	0.33147
										129.307	0.65235	0.34765		129.303	0.72684	0.27316		129.307	0.75998	0.24002		129.305	0.83991	0.16009		129.307	0.90385	0.09615		119.607	0.96075	0.03925		119.611	0.95971	0.04029		129.306	0.57728	0.42272		129.305	0.62193	0.37807		128.8	0.68689	0.31311
										129.564	0.63368	0.36632		129.56	0.71655	0.28345		129.564	0.78977	0.21023		129.562	0.82902	0.17098		129.563	0.9091	0.0909		119.844	0.96037	0.03963		119.848	0.96127	0.03873		129.562	0.61385	0.38615		129.561	0.6598	0.3402		129.055	0.68762	0.31238
										129.819	0.60818	0.39182		129.816	0.71927	0.28073		129.82	0.79023	0.20977		129.818	0.83555	0.16445		129.82	0.90542	0.09458		120.08	0.97786	0.02214		120.084	0.96029	0.03971		129.818	0.62459	0.37541		129.817	0.58463	0.41537		129.31	0.69715	0.30285
										130.076	0.63304	0.36696		130.072	0.72992	0.27008		130.076	0.78108	0.21892		130.073	0.84172	0.15828		130.075	0.91057	0.08943		120.317	0.96586	0.03414		120.322	0.96946	0.03054		130.074	0.63293	0.36707		130.073	0.61338	0.38662		129.565	0.69879	0.30121
										130.331	0.63038	0.36962		130.327	0.7112	0.2888		130.331	0.78328	0.21672		130.329	0.81271	0.18729		130.332	0.9069	0.0931		120.554	0.95984	0.04016		120.559	0.97316	0.02684		130.33	0.64657	0.35343		130.33	0.61875	0.38125		129.82	0.69539	0.30461
										130.587	0.62177	0.37823		130.583	0.72239	0.27761		130.588	0.7777	0.2223		130.586	0.80814	0.19186		130.587	0.91056	0.08944		120.791	0.96136	0.03864		120.795	0.96312	0.03688		130.586	0.61642	0.38358		130.585	0.61085	0.38915		130.075	0.69005	0.30995
										130.843	0.61841	0.38159		130.84	0.71268	0.28732		130.844	0.77837	0.22163		130.841	0.82627	0.17373		130.843	0.90966	0.09034		121.028	0.96078	0.03922		121.032	0.96596	0.03404		130.843	0.61847	0.38153		130.841	0.59953	0.40047		130.33	0.68919	0.31081
										131.1	0.63878	0.36122		131.096	0.72037	0.27963		131.101	0.78251	0.21749		131.098	0.83157	0.16843		131.099	0.9052	0.0948		121.266	0.96745	0.03255		121.269	0.9673	0.0327		131.098	0.61105	0.38895		131.097	0.65765	0.34235		130.585	0.66457	0.33543
										131.355	0.62822	0.37178		131.352	0.71449	0.28551		131.356	0.78361	0.21639		131.354	0.81399	0.18601		131.356	0.90645	0.09355		121.501	0.96805	0.03195		121.505	0.96374	0.03626		131.355	0.63816	0.36184		131.353	0.60809	0.39191		130.84	0.66843	0.33157
										131.611	0.61897	0.38103		131.607	0.71114	0.28886		131.613	0.7862	0.2138		131.61	0.8415	0.1585		131.611	0.90608	0.09392		121.738	0.96844	0.03156		121.743	0.96831	0.03169		131.61	0.56911	0.43089		131.61	0.6174	0.3826		131.096	0.6592	0.3408
										131.868	0.62677	0.37323		131.863	0.70857	0.29143		131.868	0.79247	0.20753		131.866	0.84487	0.15513		131.868	0.90616	0.09384		121.975	0.97049	0.02951		121.979	0.96007	0.03993		131.867	0.63461	0.36539		131.866	0.62529	0.37471		131.351	0.66059	0.33941
										132.124	0.63234	0.36766		132.12	0.71691	0.28309		132.125	0.79651	0.20349		132.122	0.82137	0.17863		132.124	0.9059	0.0941		122.213	0.96321	0.03679		122.216	0.959	0.041		132.123	0.62146	0.37854		132.121	0.60464	0.39536		131.605	0.66225	0.33775
										132.38	0.6503	0.3497		132.376	0.71904	0.28096		132.38	0.78689	0.21311		132.378	0.82549	0.17451		132.38	0.90884	0.09116		122.449	0.9649	0.0351		122.453	0.96109	0.03891		132.379	0.63642	0.36358		132.377	0.63836	0.36164		131.861	0.68966	0.31034
										132.636	0.60962	0.39038		132.631	0.73091	0.26909		132.636	0.7891	0.2109		132.634	0.84278	0.15722		132.636	0.90375	0.09625		122.685	0.95902	0.04098		122.69	0.94997	0.05003		132.635	0.62758	0.37242		132.633	0.61089	0.38911		132.116	0.64447	0.35553
										132.892	0.62208	0.37792		132.887	0.7191	0.2809		132.892	0.77947	0.22053		132.89	0.8163	0.1837		132.891	0.90554	0.09446		122.922	0.96963	0.03037		122.927	0.95475	0.04525		132.89	0.64519	0.35481		132.89	0.61284	0.38716		132.371	0.67271	0.32729
										133.148	0.66166	0.33834		133.144	0.71208	0.28792		133.149	0.76651	0.23349		133.146	0.8393	0.1607		133.147	0.90123	0.09877		123.159	0.96877	0.03123		123.163	0.97105	0.02895		133.146	0.76403	0.23597		133.146	0.61663	0.38337		132.626	0.67457	0.32543
										133.403	0.61395	0.38605		133.4	0.71918	0.28082		133.405	0.79664	0.20336		133.403	0.80843	0.19157		133.404	0.90657	0.09343		123.397	0.97761	0.02239		123.401	0.96493	0.03507		133.402	0.69459	0.30541		133.402	0.66495	0.33505		132.881	0.68172	0.31828
										133.66	0.63618	0.36382		133.656	0.71883	0.28117		133.661	0.78958	0.21042		133.658	0.83009	0.16991		133.66	0.9086	0.0914		123.634	0.95867	0.04133		123.637	0.96698	0.03302		133.659	0.64581	0.35419		133.658	0.61092	0.38908		133.136	0.674	0.326
										133.917	0.64775	0.35225		133.912	0.71084	0.28916		133.917	0.77533	0.22467		133.915	0.8321	0.1679		133.916	0.90834	0.09166		123.87	0.97586	0.02414		123.874	0.9699	0.0301		133.915	0.61476	0.38524		133.913	0.6333	0.3667		133.391	0.69046	0.30954
										134.172	0.61768	0.38232		134.168	0.71488	0.28512		134.173	0.79778	0.20222		134.17	0.8303	0.1697		134.172	0.90627	0.09373		124.107	0.96631	0.03369		124.111	0.97331	0.02669		134.17	0.62386	0.37614		134.17	0.59579	0.40421		133.646	0.67737	0.32263
										134.428	0.6141	0.3859		134.424	0.7131	0.2869		134.429	0.78327	0.21673		134.427	0.80932	0.19068		134.428	0.90483	0.09517		124.344	0.97177	0.02823		124.347	0.96299	0.03701		134.427	0.62567	0.37433		134.426	0.61675	0.38325		133.901	0.67869	0.32131
										134.684	0.62132	0.37868		134.68	0.71604	0.28396		134.685	0.78845	0.21155		134.683	0.83221	0.16779		134.684	0.90609	0.09391		124.581	0.96949	0.03051		124.586	0.97918	0.02082		134.683	0.61728	0.38272		134.683	0.61545	0.38455		134.156	0.68852	0.31148
										134.94	0.63794	0.36206		134.936	0.70162	0.29838		134.941	0.78245	0.21755		134.938	0.82736	0.17264		134.941	0.905	0.095		124.818	0.9748	0.0252		124.821	0.95964	0.04036		134.939	0.63114	0.36886		134.939	0.61769	0.38231		134.411	0.67229	0.32771
										135.196	0.58301	0.41699		135.192	0.71815	0.28185		135.197	0.78603	0.21397		135.194	0.83473	0.16527		135.196	0.90141	0.09859		125.054	0.96429	0.03571		125.058	0.97003	0.02997		135.195	0.62804	0.37196		135.194	0.64032	0.35968		134.667	0.67767	0.32233
										135.452	0.61457	0.38543		135.448	0.71807	0.28193		135.453	0.69163	0.30837		135.45	0.83502	0.16498		135.452	0.90713	0.09287		125.291	0.96663	0.03337		125.295	0.9552	0.0448		135.45	0.73313	0.26687		135.45	0.62224	0.37776		134.921	0.67316	0.32684
										135.709	0.63883	0.36117		135.704	0.70773	0.29227		135.709	0.77628	0.22372		135.707	0.8193	0.1807		135.709	0.90648	0.09352		125.528	0.95921	0.04079		125.533	0.9704	0.0296		135.708	0.6305	0.3695		135.706	0.61357	0.38643		135.176	0.68657	0.31343
										135.965	0.65577	0.34423		135.961	0.72062	0.27938		135.965	0.77467	0.22533		135.963	0.82808	0.17192		135.964	0.90543	0.09457		125.766	0.96384	0.03616		125.769	0.95477	0.04523		135.962	0.60936	0.39064		135.962	0.60728	0.39272		135.432	0.6722	0.3278
										136.22	0.6037	0.3963		136.217	0.71606	0.28394		136.221	0.77259	0.22741		136.219	0.83238	0.16762		136.244	0.90553	0.09447		126.003	0.9606	0.0394		126.005	0.96437	0.03563		136.22	0.60763	0.39237		136.219	0.6317	0.3683		135.686	0.72539	0.27461
										136.477	0.63337	0.36663		136.472	0.70952	0.29048		136.477	0.78116	0.21884		136.474	0.82716	0.17284		136.495	0.90179	0.09821		126.239	0.96502	0.03498		126.242	0.96169	0.03831		136.475	0.62364	0.37636		136.475	0.60874	0.39126		135.942	0.67484	0.32516
										136.733	0.63113	0.36887		136.729	0.71203	0.28797		136.733	0.52384	0.47616		136.73	0.82856	0.17144		136.752	0.90425	0.09575		126.475	0.96559	0.03441		126.479	0.96859	0.03141		136.731	0.62689	0.37311		136.732	0.59921	0.40079		136.197	0.64616	0.35384
										136.988	0.62324	0.37676		136.984	0.71237	0.28763		136.989	0.76625	0.23375		136.987	0.83046	0.16954		137.008	0.90248	0.09752		126.713	0.95697	0.04303		126.716	0.97808	0.02192		136.987	0.63137	0.36863		136.987	0.63859	0.36141		136.452	0.65612	0.34388
										137.244	0.62164	0.37836		137.241	0.70285	0.29715		137.245	0.77431	0.22569		137.243	0.83632	0.16368		137.264	0.90186	0.09814		126.95	0.96742	0.03258		126.953	0.96723	0.03277		137.243	0.62078	0.37922		137.243	0.63927	0.36073		136.707	0.73392	0.26608
										137.5	0.61951	0.38049		137.497	0.70791	0.29209		137.502	0.74198	0.25802		137.499	0.80062	0.19938		137.519	0.90226	0.09774		127.187	0.96416	0.03584		127.19	0.96308	0.03692		137.499	0.60024	0.39976		137.499	0.63784	0.36216		136.962	0.66492	0.33508
										137.757	0.61332	0.38668		137.753	0.71778	0.28222		137.757	0.76558	0.23442		137.755	0.83012	0.16988		137.775	0.90371	0.09629		127.424	0.95828	0.04172		127.426	0.95229	0.04771		137.756	0.62616	0.37384		137.755	0.61993	0.38007		137.216	0.67622	0.32378
										138.013	0.6212	0.3788		138.008	0.70994	0.29006		138.014	0.75498	0.24502		138.012	0.81614	0.18386		138.031	0.90527	0.09473		127.659	0.9622	0.0378		127.664	0.96276	0.03724		138.011	0.63039	0.36961		138.012	0.63565	0.36435		137.471	0.62272	0.37728
										138.269	0.61971	0.38029		138.265	0.7131	0.2869		138.27	0.77598	0.22402		138.268	0.79753	0.20247		138.288	0.90003	0.09997		127.897	0.95623	0.04377		127.901	0.96888	0.03112		138.268	0.58744	0.41256		138.268	0.65768	0.34232		137.726	0.65947	0.34053
										138.525	0.60622	0.39378		138.522	0.71637	0.28363		138.526	0.77779	0.22221		138.524	0.83673	0.16327		138.543	0.90562	0.09438		128.133	0.95769	0.04231		128.138	0.96955	0.03045		138.523	0.61337	0.38663		138.524	0.58504	0.41496		137.981	0.67755	0.32245
										138.78	0.60814	0.39186		138.777	0.70355	0.29645		138.782	0.76514	0.23486		138.78	0.82461	0.17539		138.8	0.90275	0.09725		128.37	0.96511	0.03489		128.373	0.96449	0.03551		138.779	0.62019	0.37981		138.78	0.62878	0.37122		138.237	0.67006	0.32994
										139.037	0.62707	0.37293		139.034	0.71578	0.28422		139.038	0.81335	0.18665		139.037	0.83178	0.16822		139.056	0.90379	0.09621		128.608	0.97432	0.02568		128.611	0.96695	0.03305		139.036	0.61244	0.38756		139.036	0.632	0.368		138.492	0.65905	0.34095
										139.293	0.61292	0.38708		139.289	0.70951	0.29049		139.293	0.77767	0.22233		139.292	0.83108	0.16892		139.312	0.9007	0.0993		128.844	0.9594	0.0406		128.847	0.96886	0.03114		139.292	0.60604	0.39396		139.292	0.61062	0.38938		138.747	0.67268	0.32732
										139.549	0.60642	0.39358		139.546	0.71087	0.28913		139.55	0.77226	0.22774		139.549	0.82538	0.17462		139.567	0.90412	0.09588		129.081	0.96321	0.03679		129.085	0.97753	0.02247		139.548	0.62052	0.37948		139.549	0.64151	0.35849		139.002	0.65059	0.34941
										139.804	0.61861	0.38139		139.801	0.70044	0.29956		139.805	0.76345	0.23655		139.804	0.83142	0.16858		139.824	0.90167	0.09833		129.318	0.97106	0.02894		129.322	0.9721	0.0279		139.804	0.61729	0.38271		139.804	0.6108	0.3892		139.257	0.67171	0.32829
										140.061	0.62499	0.37501		140.057	0.70611	0.29389		140.061	0.77358	0.22642		140.06	0.81785	0.18215		140.08	0.90051	0.09949		129.554	0.96241	0.03759		129.557	0.96083	0.03917		140.06	0.61124	0.38876		140.059	0.60583	0.39417		139.511	0.64886	0.35114
										140.317	0.68222	0.31778		140.313	0.70609	0.29391		140.317	0.77558	0.22442		140.316	0.82036	0.17964		140.336	0.90097	0.09903		129.792	0.95687	0.04313		129.796	0.95674	0.04326		140.315	0.60952	0.39048		140.316	0.62625	0.37375		139.767	0.66797	0.33203
										140.573	0.61532	0.38468		140.569	0.69582	0.30418		140.574	0.7747	0.2253		140.572	0.80056	0.19944		140.593	0.8993	0.1007		130.028	0.96039	0.03961		130.032	0.96651	0.03349		140.572	0.61585	0.38415		140.572	0.59815	0.40185		140.022	0.6575	0.3425
										140.829	0.60574	0.39426		140.825	0.71288	0.28712		140.83	0.77469	0.22531		140.828	0.82766	0.17234		140.849	0.90093	0.09907		130.265	0.96516	0.03484		130.269	0.96899	0.03101		140.828	0.59766	0.40234		140.829	0.59983	0.40017		140.277	0.65941	0.34059
										141.085	0.61941	0.38059		141.082	0.71072	0.28928		141.087	0.76543	0.23457		141.085	0.80588	0.19412		141.104	0.90108	0.09892		130.502	0.97854	0.02146		130.505	0.97738	0.02262		141.085	0.61044	0.38956		141.084	0.5957	0.4043		140.533	0.66575	0.33425
										141.341	0.62416	0.37584		141.338	0.70409	0.29591		141.342	0.76401	0.23599		141.34	0.83028	0.16972		141.36	0.89566	0.10434		130.739	0.96193	0.03807		130.743	0.96748	0.03252		141.341	0.66701	0.33299		141.34	0.61695	0.38305		140.787	0.65607	0.34393
										141.598	0.6179	0.3821		141.593	0.70791	0.29209		141.599	0.72524	0.27476		141.597	0.8363	0.1637		141.616	0.9026	0.0974		130.976	0.9538	0.0462		130.98	0.95804	0.04196		141.596	0.60533	0.39467		141.597	0.58332	0.41668		141.042	0.66524	0.33476
										141.854	0.60237	0.39763		141.85	0.70779	0.29221		141.854	0.76455	0.23545		141.853	0.81162	0.18838		141.873	0.89839	0.10161		131.213	0.96154	0.03846		131.217	0.95346	0.04654		141.852	0.61053	0.38947		141.852	0.60134	0.39866		141.298	0.68561	0.31439
										142.11	0.65517	0.34483		142.105	0.7024	0.2976		142.11	0.77383	0.22617		142.109	0.82002	0.17998		142.129	0.89969	0.10031		131.45	0.96992	0.03008		131.453	0.9543	0.0457		142.108	0.54168	0.45832		142.108	0.58537	0.41463		141.553	0.65461	0.34539
										142.365	0.60904	0.39096		142.362	0.69871	0.30129		142.367	0.76953	0.23047		142.365	0.83093	0.16907		142.384	0.89766	0.10234		131.687	0.94989	0.05011		131.69	0.96355	0.03645		142.364	0.59818	0.40182		142.365	0.58882	0.41118		141.808	0.6562	0.3438
										142.622	0.62235	0.37765		142.618	0.71381	0.28619		142.623	0.77417	0.22583		142.621	0.82809	0.17191		142.641	0.90132	0.09868		131.923	0.96473	0.03527		131.926	0.96921	0.03079		142.621	0.55642	0.44358		142.62	0.62965	0.37035		142.062	0.68809	0.31191
										142.878	0.58896	0.41104		142.873	0.70413	0.29587		142.879	0.76116	0.23884		142.877	0.81782	0.18218		142.896	0.8991	0.1009		132.161	0.96947	0.03053		132.164	0.96639	0.03361		142.876	0.5818	0.4182		142.877	0.61684	0.38316		142.318	0.65779	0.34221
										143.134	0.65562	0.34438		143.13	0.70384	0.29616		143.134	0.76095	0.23905		143.133	0.81772	0.18228		143.152	0.8986	0.1014		132.398	0.95341	0.04659		132.401	0.96553	0.03447		143.132	0.60234	0.39766		143.133	0.55517	0.44483		142.572	0.65105	0.34895
										143.39	0.61717	0.38283		143.386	0.6989	0.3011		143.391	0.76365	0.23635		143.389	0.82351	0.17649		143.409	0.8978	0.1022		132.633	0.95867	0.04133		132.638	0.95602	0.04398		143.388	0.61298	0.38702		143.389	0.62172	0.37828		142.828	0.65337	0.34663
										143.646	0.61642	0.38358		143.642	0.70677	0.29323		143.647	0.78151	0.21849		143.645	0.83103	0.16897		143.664	0.90175	0.09825		132.87	0.95943	0.04057		132.873	0.94812	0.05188		143.645	0.62789	0.37211		143.645	0.63242	0.36758		143.083	0.66151	0.33849
										143.901	0.60079	0.39921		143.898	0.68899	0.31101		143.903	0.77126	0.22874		143.901	0.82528	0.17472		143.92	0.89913	0.10087		133.108	0.96097	0.03903		133.11	0.96923	0.03077		143.901	0.62073	0.37927		143.901	0.62397	0.37603		143.338	0.67584	0.32416
										144.157	0.58932	0.41068		144.154	0.70239	0.29761		144.159	0.78418	0.21582		144.157	0.80522	0.19478		144.177	0.90033	0.09967		133.344	0.96372	0.03628		133.348	0.96846	0.03154		144.157	0.63636	0.36364		144.157	0.59204	0.40796		143.592	0.65241	0.34759
										144.413	0.57998	0.42002		144.41	0.70816	0.29184		144.415	0.77039	0.22961		144.414	0.8202	0.1798		144.433	0.8949	0.1051		133.581	0.96247	0.03753		133.585	0.95702	0.04298		144.412	0.62326	0.37674		144.413	0.58238	0.41762		143.848	0.5934	0.4066
										144.67	0.59635	0.40365		144.667	0.69551	0.30449		144.671	0.76766	0.23234		144.67	0.80113	0.19887		144.689	0.90031	0.09969		133.817	0.96136	0.03864		133.822	0.96783	0.03217		144.669	0.66795	0.33205		144.669	0.61204	0.38796		144.104	0.6501	0.3499
										144.925	0.64587	0.35413		144.922	0.69492	0.30508		144.927	0.77442	0.22558		144.926	0.80721	0.19279		144.945	0.89616	0.10384		134.055	0.96583	0.03417		134.058	0.95869	0.04131		144.924	0.65383	0.34617		144.925	0.64309	0.35691		144.358	0.66285	0.33715
										145.182	0.61815	0.38185		145.178	0.69533	0.30467		145.184	0.75652	0.24348		145.181	0.81807	0.18193		145.2	0.89763	0.10237		134.292	0.96118	0.03882		134.296	0.97192	0.02808		145.181	0.63871	0.36129		145.181	0.60345	0.39655		144.613	0.66131	0.33869
										145.438	0.5943	0.4057		145.434	0.70313	0.29687		145.439	0.77333	0.22667		145.437	0.81527	0.18473		145.457	0.89651	0.10349		134.529	0.9635	0.0365		134.532	0.97353	0.02647		145.436	0.75431	0.24569		145.437	0.59815	0.40185		144.868	0.70585	0.29415
										145.694	0.61707	0.38293		145.69	0.70082	0.29918		145.696	0.75562	0.24438		145.693	0.8058	0.1942		145.714	0.89342	0.10658		134.764	0.95623	0.04377		134.769	0.95963	0.04037		145.693	0.60297	0.39703		145.693	0.59058	0.40942		145.123	0.66637	0.33363
										145.95	0.59946	0.40054		145.947	0.69735	0.30265		145.951	0.76194	0.23806		145.949	0.81897	0.18103		145.97	0.86208	0.13792		135.001	0.95672	0.04328		135.006	0.95078	0.04922		145.95	0.60477	0.39523		145.949	0.60188	0.39812		145.378	0.67281	0.32719
										146.206	0.63822	0.36178		146.203	0.69503	0.30497		146.206	0.76158	0.23842		146.206	0.81764	0.18236		146.225	0.8586	0.1414		135.239	0.95496	0.04504		135.242	0.95945	0.04055		146.205	0.62126	0.37874		146.205	0.60822	0.39178		145.633	0.6595	0.3405
										146.462	0.63898	0.36102		146.459	0.70632	0.29368		146.463	0.54844	0.45156		146.461	0.80561	0.19439		146.481	0.8136	0.1864		135.476	0.95523	0.04477		135.479	0.95142	0.04858		146.462	0.60483	0.39517		146.461	0.58052	0.41948		145.889	0.66608	0.33392
										146.719	0.60539	0.39461		146.714	0.7007	0.2993		146.719	0.77823	0.22177		146.717	0.821	0.179		146.738	0.83582	0.16418		135.713	0.95545	0.04455		135.716	0.95837	0.04163		146.717	0.80921	0.19079		146.718	0.63763	0.36237		146.143	0.64793	0.35207
										146.974	0.58329	0.41671		146.97	0.69407	0.30593		146.975	0.76628	0.23372		146.974	0.81973	0.18027		146.993	0.84983	0.15017		135.948	0.93452	0.06548		135.954	0.96326	0.03674		146.973	0.68174	0.31826		146.973	0.59115	0.40885		146.399	0.67249	0.32751
										147.23	0.61083	0.38917		147.226	0.69395	0.30605		147.231	0.76775	0.23225		147.229	0.8746	0.1254		147.249	0.8733	0.1267		136.186	0.96583	0.03417		136.191	0.96131	0.03869		147.229	0.6024	0.3976		147.23	0.55715	0.44285		146.654	0.66186	0.33814
										147.487	0.63511	0.36489		147.483	0.69849	0.30151		147.487	0.75615	0.24385		147.485	0.84752	0.15248		147.505	0.85553	0.14447		136.423	0.96904	0.03096		136.428	0.96485	0.03515		147.485	0.61136	0.38864		147.486	0.6005	0.3995		146.909	0.6587	0.3413
										147.742	0.6061	0.3939		147.738	0.70011	0.29989		147.743	0.75388	0.24612		147.742	0.82456	0.17544		147.761	0.84838	0.15162		136.66	0.9686	0.0314		136.664	0.96575	0.03425		147.742	0.60386	0.39614		147.742	0.59605	0.40395		147.164	0.65044	0.34956
										147.998	0.61493	0.38507		147.995	0.69273	0.30727		148	0.76884	0.23116		147.998	0.80832	0.19168		148.017	0.77884	0.22116		136.897	0.96251	0.03749		136.901	0.96284	0.03716		147.998	0.60069	0.39931		147.998	0.59117	0.40883		147.419	0.65672	0.34328
										148.254	0.62315	0.37685		148.252	0.69311	0.30689		148.256	0.77138	0.22862		148.254	0.66224	0.33776		148.274	0.7885	0.2115		137.133	0.97004	0.02996		137.137	0.96438	0.03562		148.254	0.5917	0.4083		148.254	0.60523	0.39477		147.674	0.64835	0.35165
										148.511	0.61939	0.38061		148.507	0.69948	0.30052		148.512	0.92705	0.07295		148.511	0.82239	0.17761		148.53	0.78285	0.21715		137.37	0.96939	0.03061		137.375	0.95946	0.04054		148.51	0.60062	0.39938		148.509	0.58642	0.41358		147.929	0.65059	0.34941
										148.767	0.66129	0.33871		148.763	0.70381	0.29619		148.768	0.76026	0.23974		148.767	0.81727	0.18273		148.785	0.77963	0.22037		137.607	0.95549	0.04451		137.612	0.96396	0.03604		148.765	0.59692	0.40308		148.765	0.62245	0.37755		148.183	0.64356	0.35644
										149.023	0.62978	0.37022		149.019	0.69493	0.30507		149.024	0.7525	0.2475		149.022	0.81759	0.18241		149.042	0.79759	0.20241		137.844	0.96032	0.03968		137.849	0.96146	0.03854		149.021	0.60165	0.39835		149.022	0.59855	0.40145		148.438	0.66173	0.33827
										149.279	0.60731	0.39269		149.275	0.69162	0.30838		149.28	0.77227	0.22773		149.279	0.78589	0.21411		149.298	0.79831	0.20169		138.081	0.96526	0.03474		138.085	0.9586	0.0414		149.278	0.5957	0.4043		149.278	0.61459	0.38541		148.693	0.62713	0.37287
										149.534	0.60603	0.39397		149.531	0.68893	0.31107		149.536	0.76717	0.23283		149.535	0.80674	0.19326		149.554	0.76883	0.23117		138.318	0.9678	0.0322		138.322	0.96431	0.03569		149.534	0.59222	0.40778		149.534	0.60297	0.39703		148.949	0.66613	0.33387
										149.791	0.61372	0.38628		149.788	0.69864	0.30136		149.792	0.64531	0.35469		149.79	0.81143	0.18857		149.809	0.77336	0.22664		138.554	0.9657	0.0343		138.559	0.95624	0.04376		149.789	0.59538	0.40462		149.79	0.60815	0.39185		149.204	0.64688	0.35312
										150.047	0.61446	0.38554		150.043	0.7033	0.2967		150.047	0.76426	0.23574		150.047	0.78033	0.21967		150.066	0.79474	0.20526		138.792	0.95606	0.04394		138.796	0.96425	0.03575		150.046	0.60099	0.39901		150.046	0.62037	0.37963		149.459	0.65081	0.34919
										150.303	0.58858	0.41142		150.299	0.69524	0.30476		150.304	0.75407	0.24593		150.302	0.79075	0.20925		150.322	0.75645	0.24355		139.029	0.95601	0.04399		139.032	0.94953	0.05047		150.302	0.58871	0.41129		150.301	0.59979	0.40021		149.713	0.56957	0.43043
										150.559	0.59722	0.40278		150.555	0.68843	0.31157		150.559	0.76104	0.23896		150.558	0.76936	0.23064		150.578	0.78814	0.21186		139.266	0.9596	0.0404		139.269	0.96242	0.03758		150.558	0.6038	0.3962		150.558	0.57512	0.42488		149.969	0.65376	0.34624
										150.816	0.63857	0.36143		150.812	0.68658	0.31342		150.816	0.75945	0.24055		150.815	0.79285	0.20715		150.834	0.78985	0.21015		139.503	0.9604	0.0396		139.505	0.97004	0.02996		150.814	0.60231	0.39769		150.814	0.65288	0.34712		150.224	0.65477	0.34523
										151.071	0.62346	0.37654		151.067	0.68959	0.31041		151.072	0.96767	0.03233		151.071	0.88584	0.11416		151.09	0.79593	0.20407		139.739	0.96798	0.03202		139.742	0.97194	0.02806		151.07	0.58633	0.41367		151.071	0.60113	0.39887		150.479	0.64998	0.35002
										151.328	0.6093	0.3907		151.324	0.70105	0.29895		151.328	0.76372	0.23628		151.326	0.8072	0.1928		151.346	0.83826	0.16174		139.976	0.95556	0.04444		139.98	0.95728	0.04272		151.326	0.60931	0.39069		151.326	0.59115	0.40885		150.735	0.65095	0.34905
										151.584	0.60863	0.39137		151.579	0.69635	0.30365		151.584	0.75422	0.24578		151.583	0.79661	0.20339		151.603	0.8255	0.1745		140.212	0.95957	0.04043		140.215	0.96166	0.03834		151.582	0.60365	0.39635		151.582	0.63657	0.36343		150.989	0.6552	0.3448
										151.84	0.5673	0.4327		151.835	0.69618	0.30382		151.841	0.7689	0.2311		151.839	0.80662	0.19338		151.859	0.80105	0.19895		140.45	0.96329	0.03671		140.453	0.95025	0.04975		151.838	0.58741	0.41259		151.839	0.59504	0.40496		151.245	0.63949	0.36051
										152.096	0.60822	0.39178		152.091	0.69976	0.30024		152.097	0.7562	0.2438		152.094	0.81332	0.18668		152.115	0.84492	0.15508		140.687	0.96374	0.03626		140.69	0.95302	0.04698		152.095	0.60957	0.39043		152.095	0.61264	0.38736		151.499	0.65686	0.34314
										152.352	0.60766	0.39234		152.348	0.69433	0.30567		152.353	0.76374	0.23626		152.35	0.80256	0.19744		152.37	0.82603	0.17397		140.925	0.95858	0.04142		140.927	0.96593	0.03407		152.35	0.59941	0.40059		152.35	0.60644	0.39356		151.755	0.648	0.352
										152.608	0.57823	0.42177		152.604	0.69497	0.30503		152.608	0.75884	0.24116		152.607	0.84272	0.15728		152.626	0.83269	0.16731		141.161	0.96011	0.03989		141.164	0.96064	0.03936		152.607	0.71434	0.28566		152.606	0.60893	0.39107		152.009	0.65366	0.34634
										152.865	0.59316	0.40684		152.859	0.69847	0.30153		152.865	0.74009	0.25991		152.863	0.80085	0.19915		152.882	0.82972	0.17028		141.397	0.95447	0.04553		141.4	0.9289	0.0711		152.862	0.60819	0.39181		152.863	0.58668	0.41332		152.264	0.65595	0.34405
										153.12	0.61992	0.38008		153.116	0.68258	0.31742		153.121	0.76201	0.23799		153.118	0.78606	0.21394		153.139	0.8455	0.1545		141.634	0.96244	0.03756		141.638	0.95465	0.04535		153.118	0.60093	0.39907		153.118	0.58792	0.41208		152.519	0.64355	0.35645
										153.377	0.61498	0.38502		153.372	0.69288	0.30712		153.377	0.75666	0.24334		153.375	0.80506	0.19494		153.395	0.82448	0.17552		141.872	0.95546	0.04454		141.875	0.95622	0.04378		153.375	0.59655	0.40345		153.375	0.5967	0.4033		152.775	0.6476	0.3524
										153.633	0.59964	0.40036		153.627	0.69097	0.30903		153.633	0.75214	0.24786		153.631	0.81315	0.18685		153.65	0.83747	0.16253		142.108	0.95324	0.04676		142.111	0.96417	0.03583		153.631	0.58715	0.41285		153.631	0.58082	0.41918		153.03	0.64365	0.35635
										153.889	0.61319	0.38681		153.884	0.69381	0.30619		153.888	0.7628	0.2372		153.887	0.73867	0.26133		153.906	0.84598	0.15402		142.345	0.98048	0.01952		142.348	0.96347	0.03653		153.887	0.59778	0.40222		153.887	0.6077	0.3923		153.284	0.6646	0.3354
										154.145	0.6225	0.3775		154.14	0.6883	0.3117		154.145	0.75913	0.24087		154.143	0.80984	0.19016		154.163	0.85069	0.14931		142.582	0.96035	0.03965		142.584	0.95491	0.04509		154.143	0.60736	0.39264		154.143	0.58992	0.41008		153.54	0.64242	0.35758
										154.402	0.59694	0.40306		154.397	0.69421	0.30579		154.4	0.63857	0.36143		154.399	0.90088	0.09912		154.419	0.86344	0.13656		142.819	0.95753	0.04247		142.821	0.96155	0.03845		154.399	0.30811	0.69189		154.399	0.58979	0.41021		153.794	0.65263	0.34737
										154.657	0.59391	0.40609		154.652	0.68031	0.31969		154.656	0.75383	0.24617		154.657	0.81006	0.18994		154.675	0.86938	0.13062		143.055	0.96094	0.03906		143.058	0.9617	0.0383		154.655	0.58916	0.41084		154.655	0.59323	0.40677		154.05	0.64805	0.35195
										154.913	0.59511	0.40489		154.908	0.6927	0.3073		154.912	0.75711	0.24289		154.912	0.80146	0.19854		154.93	0.84495	0.15505		143.293	0.95058	0.04942		143.295	0.97366	0.02634		154.911	0.5958	0.4042		154.911	0.57914	0.42086		154.304	0.65769	0.34231
										155.17	0.575	0.425		155.164	0.6798	0.3202		155.169	0.75361	0.24639		155.168	0.80087	0.19913		155.186	0.84285	0.15715		143.529	0.9718	0.0282		143.532	0.9552	0.0448		155.167	0.59797	0.40203		155.167	0.60063	0.39937		154.559	0.6476	0.3524
										155.425	0.59917	0.40083		155.421	0.69333	0.30667		155.425	0.72943	0.27057		155.425	0.80492	0.19508		155.443	0.85598	0.14402		143.766	0.95857	0.04143		143.768	0.95143	0.04857		155.423	0.59213	0.40787		155.422	0.57834	0.42166		154.815	0.64805	0.35195
										155.681	0.63012	0.36988		155.677	0.68986	0.31014		155.681	0.71868	0.28132		155.68	0.78608	0.21392		155.699	0.84629	0.15371		144.002	0.96632	0.03368		144.006	0.96273	0.03727		155.679	0.59518	0.40482		155.679	0.56742	0.43258		155.07	0.64342	0.35658
										155.937	0.6038	0.3962		155.932	0.68442	0.31558		155.937	0.74519	0.25481		155.937	0.80916	0.19084		155.954	0.85798	0.14202		144.239	0.94038	0.05962		144.243	0.96988	0.03012		155.936	0.60224	0.39776		155.936	0.57813	0.42187		155.325	0.66249	0.33751
										156.193	0.6215	0.3785		156.188	0.68514	0.31486		156.193	0.74514	0.25486		156.193	0.798	0.202		156.21	0.84553	0.15447		144.477	0.96265	0.03735		144.479	0.96746	0.03254		156.191	0.56594	0.43406		156.192	0.59163	0.40837		155.58	0.65385	0.34615
										156.45	0.57032	0.42968		156.444	0.6856	0.3144		156.449	0.75279	0.24721		156.448	0.80725	0.19275		156.466	0.86674	0.13326		144.713	0.96274	0.03726		144.716	0.95714	0.04286		156.448	0.58519	0.41481		156.447	0.60863	0.39137		155.835	0.64732	0.35268
										156.705	0.63043	0.36957		156.7	0.67991	0.32009		156.705	0.75025	0.24975		156.705	0.82971	0.17029		156.724	0.86425	0.13575		144.95	0.96094	0.03906		144.953	0.95185	0.04815		156.702	0.60625	0.39375		156.703	0.58511	0.41489		156.09	0.64254	0.35746
										156.961	0.59374	0.40626		156.957	0.68583	0.31417		156.96	0.75459	0.24541		156.961	0.81756	0.18244		156.979	0.85268	0.14732		145.187	0.95698	0.04302		145.189	0.94701	0.05299		156.959	0.60873	0.39127		156.959	0.59461	0.40539		156.345	0.60774	0.39226
										157.217	0.6097	0.3903		157.212	0.6833	0.3167		157.217	0.74629	0.25371		157.216	0.60477	0.39523		157.235	0.8655	0.1345		145.424	0.95987	0.04013		145.427	0.96145	0.03855		157.215	0.59231	0.40769		157.215	0.59086	0.40914		156.6	0.62253	0.37747
										157.473	0.61138	0.38862		157.469	0.68623	0.31377		157.473	0.76019	0.23981		157.473	0.80022	0.19978		157.491	0.86431	0.13569		145.66	0.96034	0.03966		145.665	0.96896	0.03104		157.471	0.59504	0.40496		157.471	0.57084	0.42916		156.855	0.63559	0.36441
										157.73	0.60185	0.39815		157.725	0.68883	0.31117		157.729	0.75703	0.24297		157.729	0.75614	0.24386		157.747	0.83742	0.16258		145.897	0.95425	0.04575		145.901	0.94799	0.05201		157.728	0.59476	0.40524		157.728	0.61037	0.38963		157.11	0.65443	0.34557
										157.985	0.58406	0.41594		157.981	0.68508	0.31492		157.985	0.74034	0.25966		157.985	0.86276	0.13724		158.003	0.83027	0.16973		146.134	0.94961	0.05039		146.137	0.95615	0.04385		157.983	0.58216	0.41784		157.984	0.57531	0.42469		157.365	0.65073	0.34927
										158.241	0.57288	0.42712		158.236	0.67962	0.32038		158.242	0.74935	0.25065		158.241	0.79485	0.20515		158.259	0.85209	0.14791		146.371	0.95194	0.04806		146.374	0.9563	0.0437		158.24	0.58556	0.41444		158.24	0.57622	0.42378		157.62	0.66033	0.33967
										158.498	0.57223	0.42777		158.493	0.68178	0.31822		158.497	0.76394	0.23606		158.497	0.80372	0.19628		158.515	0.84455	0.15545		146.608	0.96157	0.03843		146.61	0.95755	0.04245		158.496	0.36366	0.63634		158.496	0.56577	0.43423		157.876	0.65701	0.34299
										158.753	0.55009	0.44991		158.749	0.68936	0.31064		158.753	0.76342	0.23658		158.753	0.80885	0.19115		158.771	0.85511	0.14489		146.844	0.95351	0.04649		146.848	0.96042	0.03958		158.752	0.58409	0.41591		158.752	0.59907	0.40093		158.131	0.66185	0.33815
										159.009	0.59029	0.40971		159.005	0.67838	0.32162		159.009	0.76576	0.23424		159.009	0.79892	0.20108		159.028	0.84714	0.15286		147.082	0.96958	0.03042		147.086	0.95399	0.04601		159.007	0.59349	0.40651		159.007	0.60301	0.39699		158.385	0.64226	0.35774
										159.266	0.59257	0.40743		159.261	0.67877	0.32123		159.266	0.74799	0.25201		159.265	0.80219	0.19781		159.284	0.84839	0.15161		147.318	0.95495	0.04505		147.322	0.95861	0.04139		159.264	0.61553	0.38447		159.264	0.58262	0.41738		158.641	0.62166	0.37834
										159.521	0.58715	0.41285		159.516	0.67801	0.32199		159.521	0.61522	0.38478		159.522	0.79748	0.20252		159.54	0.85157	0.14843		147.555	0.95762	0.04238		147.558	0.9579	0.0421		159.52	0.56427	0.43573		159.52	0.60283	0.39717		158.896	0.63822	0.36178
										159.777	0.61073	0.38927		159.774	0.68076	0.31924		159.778	0.95371	0.04629		159.777	0.81097	0.18903		159.796	0.85459	0.14541		147.793	0.95074	0.04926		147.795	0.9489	0.0511		159.775	0.59759	0.40241		159.775	0.58611	0.41389		159.151	0.65411	0.34589
										160.034	0.60091	0.39909		160.029	0.69316	0.30684		160.033	0.77504	0.22496		160.033	0.80743	0.19257		160.051	0.86411	0.13589		148.029	0.9542	0.0458		148.032	0.96143	0.03857		160.032	0.58543	0.41457		160.031	0.58226	0.41774		159.406	0.63566	0.36434
										160.29	0.58587	0.41413		160.285	0.67733	0.32267		160.29	0.75275	0.24725		160.289	0.7912	0.2088		160.308	0.85488	0.14512		148.265	0.9517	0.0483		148.269	0.94306	0.05694		160.288	0.58338	0.41662		160.288	0.60017	0.39983		159.66	0.65378	0.34622
										160.546	0.55664	0.44336		160.542	0.69486	0.30514		160.545	0.74055	0.25945		160.546	0.7511	0.2489		160.564	0.8622	0.1378		148.502	0.95935	0.04065		148.505	0.96268	0.03732		160.544	0.69407	0.30593		160.544	0.57889	0.42111		159.916	0.65145	0.34855
										160.801	0.61011	0.38989		160.797	0.67961	0.32039		160.802	0.74982	0.25018		160.801	0.79319	0.20681		160.82	0.84201	0.15799		148.74	0.96523	0.03477		148.743	0.94927	0.05073		160.8	0.57432	0.42568		160.799	0.60745	0.39255		160.171	0.63936	0.36064
										161.058	0.56581	0.43419		161.054	0.68154	0.31846		161.058	0.75227	0.24773		161.058	0.80373	0.19627		161.076	0.83088	0.16912		148.977	0.96495	0.03505		148.979	0.95546	0.04454		161.056	0.57872	0.42128		161.056	0.62291	0.37709		160.426	0.64214	0.35786
										161.314	0.61403	0.38597		161.309	0.67179	0.32821		161.314	0.76311	0.23689		161.313	0.85388	0.14612		161.332	0.85607	0.14393		149.214	0.96027	0.03973		149.217	0.94324	0.05676		161.311	0.59969	0.40031		161.313	0.57425	0.42575		160.681	0.63116	0.36884
										161.57	0.57517	0.42483		161.566	0.68209	0.31791		161.57	0.74989	0.25011		161.57	0.80529	0.19471		161.588	0.8609	0.1391		149.449	0.96029	0.03971		149.453	0.96051	0.03949		161.568	0.39809	0.60191		161.567	0.51691	0.48309		160.936	0.65211	0.34789
										161.826	0.59253	0.40747		161.822	0.68646	0.31354		161.826	0.72857	0.27143		161.825	0.79278	0.20722		161.843	0.85813	0.14187		149.686	0.96682	0.03318		149.69	0.96092	0.03908		161.824	0.56389	0.43611		161.825	0.59822	0.40178		161.191	0.62795	0.37205
										162.082	0.59121	0.40879		162.077	0.6841	0.3159		162.082	0.74851	0.25149		162.082	0.79937	0.20063		162.1	0.86763	0.13237		149.924	0.9724	0.0276		149.927	0.95463	0.04537		162.08	0.57553	0.42447		162.08	0.61353	0.38647		161.446	0.64761	0.35239
										162.338	0.5913	0.4087		162.333	0.67863	0.32137		162.338	0.76288	0.23712		162.338	0.7436	0.2564		162.357	0.86824	0.13176		150.161	0.96351	0.03649		150.164	0.94547	0.05453		162.336	0.58153	0.41847		162.337	0.60426	0.39574		161.701	0.63717	0.36283
										162.595	0.57781	0.42219		162.59	0.68102	0.31898		162.594	0.76663	0.23337		162.594	0.81417	0.18583		162.613	0.85745	0.14255		150.398	0.95947	0.04053		150.4	0.96116	0.03884		162.592	0.6004	0.3996		162.592	0.58345	0.41655		161.956	0.62262	0.37738
										162.85	0.65152	0.34848		162.845	0.67627	0.32373		162.85	0.74899	0.25101		162.849	0.89017	0.10983		162.869	0.85239	0.14761		150.634	0.96518	0.03482		150.637	0.96543	0.03457		162.848	0.59964	0.40036		162.848	0.5926	0.4074		162.212	0.63672	0.36328
										163.107	0.58882	0.41118		163.101	0.67944	0.32056		163.107	0.89843	0.10157		163.105	0.79616	0.20384		163.124	0.863	0.137		150.871	0.95427	0.04573		150.874	0.9574	0.0426		163.104	0.59242	0.40758		163.105	0.57743	0.42257		162.466	0.63915	0.36085
										163.363	0.59345	0.40655		163.357	0.67101	0.32899		163.362	0.74493	0.25507		163.362	0.78267	0.21733		163.38	0.86954	0.13046		151.108	0.92394	0.07606		151.111	0.95598	0.04402		163.36	0.55602	0.44398		163.36	0.57907	0.42093		162.722	0.62761	0.37239
										163.619	0.61938	0.38062		163.614	0.68388	0.31612		163.618	0.73405	0.26595		163.617	0.78835	0.21165		163.636	0.86463	0.13537		151.344	0.96243	0.03757		151.348	0.95502	0.04498		163.616	0.58372	0.41628		163.616	0.58556	0.41444		162.977	0.63116	0.36884
										163.875	0.58882	0.41118		163.869	0.68496	0.31504		163.875	0.74867	0.25133		163.874	0.80931	0.19069		163.893	0.87703	0.12297		151.581	0.95272	0.04728		151.585	0.97341	0.02659		163.872	0.58978	0.41022		163.872	0.55842	0.44158		163.232	0.63321	0.36679
										164.131	0.62773	0.37227		164.126	0.67969	0.32031		164.131	0.74625	0.25375		164.13	0.78066	0.21934		164.148	0.86581	0.13419		151.818	0.95673	0.04327		151.821	0.96756	0.03244		164.128	0.69408	0.30592		164.128	0.61199	0.38801		163.486	0.63193	0.36807
										164.387	0.62651	0.37349		164.382	0.67715	0.32285		164.386	0.61174	0.38826		164.386	0.79558	0.20442		164.405	0.86327	0.13673		152.055	0.96015	0.03985		152.059	0.95334	0.04666		164.384	0.47338	0.52662		164.385	0.59171	0.40829		163.742	0.63641	0.36359
										164.643	0.58809	0.41191		164.637	0.66367	0.33633		164.643	0.73246	0.26754		164.641	0.78995	0.21005		164.66	0.84801	0.15199		152.292	0.95764	0.04236		152.295	0.94739	0.05261		164.64	0.58183	0.41817		164.64	0.5924	0.4076		163.997	0.64901	0.35099
										164.899	0.60209	0.39791		164.893	0.68865	0.31135		164.899	0.74816	0.25184		164.898	0.80171	0.19829		164.917	0.83894	0.16106		152.529	0.95695	0.04305		152.532	0.95716	0.04284		164.897	0.59948	0.40052		164.897	0.60974	0.39026		164.251	0.66861	0.33139
										165.155	0.57894	0.42106		165.15	0.68375	0.31625		165.154	0.74108	0.25892		165.154	0.79469	0.20531		165.173	0.77834	0.22166		152.767	0.94326	0.05674		152.77	0.95731	0.04269		165.152	0.44794	0.55206		165.153	0.59881	0.40119		164.508	0.65735	0.34265
										165.41	0.59159	0.40841		165.406	0.67846	0.32154		165.41	0.74011	0.25989		165.41	0.79996	0.20004		165.429	0.82118	0.17882		153.003	0.94335	0.05665		153.006	0.95629	0.04371		165.408	0.56909	0.43091		165.409	0.58839	0.41161		164.762	0.63053	0.36947
										165.667	0.59122	0.40878		165.662	0.66417	0.33583		165.667	0.73642	0.26358		165.666	0.79956	0.20044		165.685	0.84552	0.15448		153.239	0.94782	0.05218		153.243	0.9676	0.0324		165.665	0.59162	0.40838		165.665	0.5874	0.4126		165.017	0.63994	0.36006
										165.923	0.6003	0.3997		165.918	0.68881	0.31119		165.923	0.74178	0.25822		165.923	0.78285	0.21715		165.94	0.84838	0.15162		153.476	0.96213	0.03787		153.479	0.96653	0.03347		165.921	0.57264	0.42736		165.921	0.60478	0.39522		165.272	0.63788	0.36212
										166.179	0.59602	0.40398		166.174	0.67616	0.32384		166.178	0.74436	0.25564		166.179	0.79418	0.20582		166.197	0.86122	0.13878		153.713	0.94936	0.05064		153.717	0.93848	0.06152		166.177	0.57901	0.42099		166.177	0.59288	0.40712		165.526	0.66354	0.33646
										166.435	0.55805	0.44195		166.43	0.66885	0.33115		166.434	0.75039	0.24961		166.435	0.86642	0.13358		166.453	0.83617	0.16383		153.95	0.96715	0.03285		153.953	0.9601	0.0399		166.433	0.5959	0.4041		166.434	0.58599	0.41401		165.782	0.64075	0.35925
										166.691	0.59705	0.40295		166.686	0.67194	0.32806		166.692	0.7451	0.2549		166.691	0.7994	0.2006		166.709	0.83244	0.16756		154.188	0.97007	0.02993		154.191	0.97119	0.02881		166.689	0.56448	0.43552		166.689	0.55816	0.44184		166.037	0.63774	0.36226
										166.947	0.58479	0.41521		166.943	0.67114	0.32886		166.947	0.75418	0.24582		166.947	0.78541	0.21459		166.965	0.81618	0.18382		154.425	0.96943	0.03057		154.427	0.96318	0.03682		166.945	0.58183	0.41817		166.945	0.57684	0.42316		166.292	0.63835	0.36165
										167.204	0.55736	0.44264		167.199	0.67672	0.32328		167.203	0.76881	0.23119		167.202	0.79174	0.20826		167.221	0.84274	0.15726		154.66	0.95269	0.04731		154.664	0.96214	0.03786		167.201	0.58539	0.41461		167.201	0.56609	0.43391		166.547	0.63116	0.36884
										167.46	0.59572	0.40428		167.455	0.66846	0.33154		167.46	0.80023	0.19977		167.459	0.78768	0.21232		167.477	0.84612	0.15388		154.897	0.95595	0.04405		154.901	0.95565	0.04435		167.457	0.58435	0.41565		167.457	0.59729	0.40271		166.802	0.63743	0.36257
										167.715	0.58313	0.41687		167.711	0.67039	0.32961		167.715	0.78625	0.21375		167.714	0.79417	0.20583		167.734	0.84578	0.15422		155.135	0.97259	0.02741		155.138	0.94387	0.05613		167.713	0.57024	0.42976		167.714	0.59775	0.40225		167.058	0.62547	0.37453
										167.971	0.60128	0.39872		167.967	0.67192	0.32808		167.971	0.77982	0.22018		167.971	0.80326	0.19674		167.989	0.82956	0.17044		155.371	0.95673	0.04327		155.375	0.97098	0.02902		167.969	0.56661	0.43339		167.969	0.59868	0.40132		167.313	0.626	0.374
										168.227	0.60874	0.39126		168.222	0.668	0.332		168.227	0.76647	0.23353		168.227	0.79227	0.20773		168.245	0.81863	0.18137		155.609	0.95338	0.04662		155.611	0.95361	0.04639		168.225	0.62475	0.37525		168.226	0.59869	0.40131		167.567	0.63364	0.36636
										168.484	0.59659	0.40341		168.479	0.6753	0.3247		168.484	0.85572	0.14428		168.483	0.78699	0.21301		168.502	0.84077	0.15923		155.844	0.96922	0.03078		155.848	0.94787	0.05213		168.481	0.58949	0.41051		168.482	0.59595	0.40405		167.823	0.52395	0.47605
										168.74	0.56886	0.43114		168.734	0.67399	0.32601		168.74	0.76614	0.23386		168.739	0.79101	0.20899		168.758	0.8258	0.1742		156.082	0.95036	0.04964		156.084	0.96692	0.03308		168.739	0.58047	0.41953		168.737	0.58188	0.41812		168.078	0.64743	0.35257
										168.996	0.57913	0.42087		168.991	0.67263	0.32737		168.996	0.76207	0.23793		168.995	0.79053	0.20947		169.013	0.82459	0.17541		156.319	0.94904	0.05096		156.322	0.95162	0.04838		168.994	0.58755	0.41245		168.994	0.58458	0.41542		168.332	0.66887	0.33113
										169.252	0.60661	0.39339		169.246	0.66359	0.33641		169.251	0.74747	0.25253		169.251	0.77942	0.22058		169.269	0.8371	0.1629		156.556	0.95182	0.04818		156.559	0.95462	0.04538		169.25	0.5741	0.4259		169.25	0.59575	0.40425		168.588	0.6461	0.3539
										169.508	0.57542	0.42458		169.502	0.66463	0.33537		169.508	0.74583	0.25417		169.507	0.78838	0.21162		169.525	0.82018	0.17982		156.792	0.95852	0.04148		156.797	0.95736	0.04264		169.506	0.60042	0.39958		169.506	0.57681	0.42319		168.843	0.6299	0.3701
										169.764	0.60372	0.39628		169.758	0.67284	0.32716		169.764	0.76069	0.23931		169.763	0.78303	0.21697		169.781	0.83464	0.16536		157.03	0.95362	0.04638		157.032	0.96949	0.03051		169.763	0.59243	0.40757		169.761	0.57776	0.42224		169.098	0.62862	0.37138
										170.02	0.57734	0.42266		170.014	0.66135	0.33865		170.019	0.74891	0.25109		170.019	0.73372	0.26628		170.037	0.8429	0.1571		157.265	0.94667	0.05333		157.269	0.95559	0.04441		170.019	0.86858	0.13142		170.018	0.59961	0.40039		169.353	0.62295	0.37705
										170.275	0.60201	0.39799		170.271	0.6646	0.3354		170.275	0.56512	0.43488		170.275	0.79285	0.20715		170.294	0.84679	0.15321		157.504	0.96632	0.03368		157.506	0.95882	0.04118		170.274	0.60245	0.39755		170.274	0.59019	0.40981		169.608	0.64447	0.35553
										170.532	0.59009	0.40991		170.527	0.67085	0.32915		170.531	0.74821	0.25179		170.531	0.80489	0.19511		170.55	0.82362	0.17638		157.74	0.96505	0.03495		157.743	0.94799	0.05201		170.531	0.6164	0.3836		170.53	0.57761	0.42239		169.863	0.64363	0.35637
										170.787	0.59568	0.40432		170.783	0.6691	0.3309		170.788	0.72114	0.27886		170.787	0.79646	0.20354		170.806	0.84278	0.15722		157.977	0.94558	0.05442		157.979	0.96773	0.03227		170.787	0.5774	0.4226		170.786	0.58013	0.41987		170.118	0.62873	0.37127
										171.044	0.58103	0.41897		171.039	0.67137	0.32863		171.043	0.67207	0.32793		171.043	0.78318	0.21682		171.063	0.84476	0.15524		158.214	0.95144	0.04856		158.217	0.95868	0.04132		171.043	0.58387	0.41613		171.042	0.55524	0.44476		170.372	0.62673	0.37327
										171.3	0.58265	0.41735		171.295	0.6642	0.3358		171.299	0.73535	0.26465		171.299	0.78533	0.21467		171.318	0.84622	0.15378		158.45	0.96777	0.03223		158.453	0.96361	0.03639		171.299	0.58678	0.41322		171.298	0.5831	0.4169		170.628	0.62832	0.37168
										171.556	0.57721	0.42279		171.552	0.67054	0.32946		171.555	0.73633	0.26367		171.555	0.76377	0.23623		171.573	0.8415	0.1585		158.687	0.96211	0.03789		158.691	0.95796	0.04204		171.555	0.58305	0.41695		171.554	0.59086	0.40914		170.883	0.63091	0.36909
										171.812	0.53886	0.46114		171.807	0.66819	0.33181		171.812	0.73938	0.26062		171.811	0.78807	0.21193		171.83	0.84183	0.15817		158.924	0.95533	0.04467		158.927	0.96088	0.03912		171.81	0.59379	0.40621		171.81	0.58744	0.41256		171.138	0.63398	0.36602
										172.068	0.58743	0.41257		172.063	0.67158	0.32842		172.068	0.74024	0.25976		172.067	0.78978	0.21022		172.086	0.86466	0.13534		159.162	0.95076	0.04924		159.163	0.95287	0.04713		172.067	0.58222	0.41778		172.066	0.57306	0.42694		171.393	0.63522	0.36478
										172.324	0.58924	0.41076		172.32	0.67316	0.32684		172.325	0.7283	0.2717		172.324	0.78356	0.21644		172.343	0.86364	0.13636		159.399	0.96412	0.03588		159.4	0.9586	0.0414		172.323	0.59085	0.40915		172.322	0.5927	0.4073		171.649	0.63008	0.36992
										172.58	0.57587	0.42413		172.575	0.67443	0.32557		172.581	0.70669	0.29331		172.58	0.79128	0.20872		172.597	0.86313	0.13687		159.635	0.9563	0.0437		159.637	0.96398	0.03602		172.579	0.57007	0.42993		172.578	0.60105	0.39895		171.903	0.62786	0.37214
										172.837	0.56489	0.43511		172.831	0.66836	0.33164		172.836	0.72945	0.27055		172.836	0.77354	0.22646		172.855	0.87045	0.12955		159.871	0.97296	0.02704		159.875	0.96292	0.03708		172.835	0.61558	0.38442		172.834	0.55129	0.44871		172.158	0.63573	0.36427
										173.092	0.60517	0.39483		173.088	0.65322	0.34678		173.092	0.73614	0.26386		173.093	0.7798	0.2202		173.11	0.87325	0.12675		160.108	0.9668	0.0332		160.111	0.96061	0.03939		173.091	0.58425	0.41575		173.09	0.59437	0.40563		172.413	0.62734	0.37266
										173.348	0.58797	0.41203		173.343	0.66476	0.33524		173.347	0.72331	0.27669		173.348	0.81002	0.18998		173.366	0.87305	0.12695		160.346	0.96086	0.03914		160.348	0.95587	0.04413		173.347	0.41135	0.58865		173.346	0.58855	0.41145		172.668	0.63129	0.36871
										173.605	0.58004	0.41996		173.6	0.66926	0.33074		173.604	0.74891	0.25109		173.605	0.78519	0.21481		173.622	0.86933	0.13067		160.583	0.96587	0.03413		160.584	0.95215	0.04785		173.603	0.59392	0.40608		173.602	0.57055	0.42945		172.924	0.6306	0.3694
										173.861	0.59949	0.40051		173.855	0.66843	0.33157		173.86	0.7353	0.2647		173.861	0.77285	0.22715		173.879	0.86104	0.13896		160.82	0.95888	0.04112		160.822	0.95581	0.04419		173.859	0.58657	0.41343		173.859	0.57938	0.42062		173.179	0.64172	0.35828
										174.116	0.59854	0.40146		174.111	0.66901	0.33099		174.117	0.73484	0.26516		174.117	0.73442	0.26558		174.135	0.86403	0.13597		161.057	0.9577	0.0423		161.059	0.94301	0.05699		174.116	0.56818	0.43182		174.114	0.57577	0.42423		173.433	0.62207	0.37793
										174.373	0.57469	0.42531		174.368	0.66584	0.33416		174.373	0.73361	0.26639		174.372	0.77481	0.22519		174.39	0.86941	0.13059		161.292	0.96937	0.03063		161.296	0.961	0.039		174.372	0.62721	0.37279		174.37	0.59002	0.40998		173.688	0.62647	0.37353
										174.629	0.58636	0.41364		174.624	0.65056	0.34944		174.628	0.54719	0.45281		174.629	0.7931	0.2069		174.646	0.86154	0.13846		161.529	0.95806	0.04194		161.532	0.95827	0.04173		174.628	0.57674	0.42326		174.627	0.59342	0.40658		173.944	0.62288	0.37712
										174.885	0.60254	0.39746		174.88	0.6597	0.3403		174.885	0.73303	0.26697		174.884	0.80171	0.19829		174.903	0.87256	0.12744		161.766	0.95838	0.04162		161.768	0.95803	0.04197		174.883	0.584	0.416		174.883	0.54627	0.45373		174.199	0.62658	0.37342
										175.14	0.57885	0.42115		175.136	0.6704	0.3296		175.14	0.68358	0.31642		175.141	0.79555	0.20445		175.158	0.87582	0.12418		162.003	0.95729	0.04271		162.006	0.96124	0.03876		175.14	0.49235	0.50765		175.139	0.56283	0.43717		174.454	0.634	0.366
										175.396	0.5597	0.4403		175.392	0.66084	0.33916		175.397	0.73612	0.26388		175.397	0.70952	0.29048		175.414	0.84487	0.15513		162.24	0.9636	0.0364		162.242	0.96802	0.03198		175.396	0.56478	0.43522		175.395	0.5804	0.4196		174.709	0.63227	0.36773
										175.653	0.61246	0.38754		175.648	0.65328	0.34672		175.652	0.73459	0.26541		175.652	0.78525	0.21475		175.67	0.86569	0.13431		162.477	0.96897	0.03103		162.48	0.94967	0.05033		175.652	0.5797	0.4203		175.651	0.54971	0.45029		174.964	0.62306	0.37694
										175.909	0.57002	0.42998		175.904	0.67008	0.32992		175.909	0.73234	0.26766		175.909	0.7898	0.2102		175.927	0.86756	0.13244		162.714	0.95266	0.04734		162.716	0.95397	0.04603		175.907	0.55145	0.44855		175.907	0.6121	0.3879		175.218	0.63286	0.36714
										176.165	0.57153	0.42847		176.161	0.66358	0.33642		176.165	0.72387	0.27613		176.166	0.77923	0.22077		176.183	0.87012	0.12988		162.951	0.95278	0.04722		162.952	0.95339	0.04661		176.164	0.57809	0.42191		176.163	0.60021	0.39979		175.474	0.61544	0.38456
										176.421	0.55799	0.44201		176.416	0.65906	0.34094		176.421	0.6204	0.3796		176.422	0.76482	0.23518		176.439	0.86764	0.13236		163.188	0.95866	0.04134		163.19	0.94782	0.05218		176.419	0.45833	0.54167		176.419	0.58406	0.41594		175.729	0.62753	0.37247
										176.677	0.59067	0.40933		176.672	0.66341	0.33659		176.676	0.73091	0.26909		176.677	0.78079	0.21921		176.695	0.86299	0.13701		163.425	0.96214	0.03786		163.427	0.95924	0.04076		176.676	0.56825	0.43175		176.674	0.5724	0.4276		175.983	0.62967	0.37033
										176.934	0.55755	0.44245		176.928	0.66219	0.33781		176.933	0.71866	0.28134		176.934	0.78167	0.21833		176.951	0.87203	0.12797		163.662	0.96549	0.03451		163.664	0.96834	0.03166		176.932	0.58812	0.41188		176.93	0.5886	0.4114		176.239	0.62502	0.37498
										177.189	0.59546	0.40454		177.184	0.66475	0.33525		177.188	0.71585	0.28415		177.189	0.78433	0.21567		177.206	0.84623	0.15377		163.898	0.95304	0.04696		163.902	0.94735	0.05265		177.188	0.58779	0.41221		177.187	0.60485	0.39515		176.494	0.62047	0.37953
										177.446	0.60151	0.39849		177.44	0.65545	0.34455		177.445	0.73254	0.26746		177.445	0.78307	0.21693		177.463	0.87208	0.12792		164.136	0.95628	0.04372		164.137	0.94797	0.05203		177.443	0.56794	0.43206		177.443	0.56839	0.43161		176.749	0.6195	0.3805
										177.703	0.54651	0.45349		177.696	0.6719	0.3281		177.701	0.71752	0.28248		177.702	0.78477	0.21523		177.719	0.86693	0.13307		164.372	0.9541	0.0459		164.374	0.94909	0.05091		177.701	0.55759	0.44241		177.699	0.5877	0.4123		177.004	0.61997	0.38003
										177.958	0.56768	0.43232		177.952	0.65698	0.34302		177.957	0.73113	0.26887		177.957	0.79476	0.20524		177.976	0.8688	0.1312		164.609	0.9468	0.0532		164.612	0.95328	0.04672		177.956	0.57126	0.42874		177.955	0.53366	0.46634		177.259	0.66051	0.33949
										178.214	0.63524	0.36476		178.208	0.65662	0.34338		178.213	0.72752	0.27248		178.214	0.78498	0.21502		178.231	0.86854	0.13146		164.845	0.95918	0.04082		164.849	0.9488	0.0512		178.212	0.56606	0.43394		178.212	0.58726	0.41274		177.515	0.5925	0.4075
										178.47	0.58212	0.41788		178.465	0.65694	0.34306		178.47	0.73911	0.26089		178.47	0.79129	0.20871		178.487	0.86168	0.13832		165.083	0.95864	0.04136		165.085	0.9625	0.0375		178.468	0.6248	0.3752		178.467	0.5755	0.4245		177.77	0.63587	0.36413
										178.726	0.58276	0.41724		178.721	0.65688	0.34312		178.726	0.71977	0.28023		178.726	0.77373	0.22627		178.743	0.87008	0.12992		165.319	0.95729	0.04271		165.323	0.95194	0.04806		178.724	0.58332	0.41668		178.724	0.58136	0.41864		178.025	0.61675	0.38325
										178.983	0.57388	0.42612		178.977	0.66558	0.33442		178.982	0.7227	0.2773		178.981	0.78374	0.21626		179	0.87015	0.12985		165.557	0.94886	0.05114		165.559	0.95659	0.04341		178.98	0.57101	0.42899		178.979	0.56542	0.43458		178.28	0.62478	0.37522
										179.238	0.58295	0.41705		179.233	0.65721	0.34279		179.239	0.73627	0.26373		179.238	0.78129	0.21871		179.256	0.86053	0.13947		165.794	0.95016	0.04984		165.795	0.94392	0.05608		179.236	0.59043	0.40957		179.235	0.55805	0.44195		178.534	0.62051	0.37949
										179.494	0.56709	0.43291		179.488	0.6583	0.3417		179.494	0.74568	0.25432		179.493	0.80876	0.19124		179.511	0.86854	0.13146		166.031	0.95265	0.04735		166.032	0.97036	0.02964		179.492	0.58557	0.41443		179.491	0.57265	0.42735		178.789	0.62289	0.37711
										179.75	0.57062	0.42938		179.745	0.66622	0.33378		179.75	0.73311	0.26689		179.75	0.7948	0.2052		179.768	0.86246	0.13754		166.266	0.94875	0.05125		166.27	0.94821	0.05179		179.748	0.56896	0.43104		179.747	0.52742	0.47258		179.044	0.58525	0.41475
										180.006	0.57737	0.42263		180.001	0.6628	0.3372		180.007	0.72591	0.27409		180.006	0.7809	0.2191		180.023	0.8735	0.1265		166.503	0.95462	0.04538		166.507	0.94746	0.05254		180.005	0.58224	0.41776		180.003	0.56799	0.43201		179.299	0.62276	0.37724
										180.262	0.59399	0.40601		180.257	0.66049	0.33951		180.262	0.60758	0.39242		180.262	0.78227	0.21773		180.279	0.8657	0.1343		166.74	0.96365	0.03635		166.742	0.95335	0.04665		180.26	0.62953	0.37047		180.26	0.58308	0.41692		179.554	0.62769	0.37231
										180.519	0.60711	0.39289		180.513	0.64523	0.35477		180.518	0.73247	0.26753		180.518	0.83751	0.16249		180.535	0.86537	0.13463		166.977	0.95673	0.04327		166.979	0.94354	0.05646		180.516	0.44315	0.55685		180.516	0.55575	0.44425		179.809	0.62686	0.37314
										180.775	0.55672	0.44328		180.768	0.66171	0.33829		180.775	0.73075	0.26925		180.775	0.68055	0.31945		180.791	0.86593	0.13407		167.214	0.95012	0.04988		167.217	0.95051	0.04949		180.772	0.58184	0.41816		180.772	0.57478	0.42522		180.064	0.6168	0.3832
										181.031	0.56916	0.43084		181.025	0.66832	0.33168		181.031	0.72701	0.27299		181.03	0.76658	0.23342		181.048	0.86545	0.13455		167.451	0.94684	0.05316		167.453	0.95057	0.04943		181.028	0.77701	0.22299		181.028	0.57658	0.42342		180.32	0.62559	0.37441
										181.287	0.5642	0.4358		181.281	0.65664	0.34336		181.287	0.73549	0.26451		181.286	0.77675	0.22325		181.304	0.85338	0.14662		167.687	0.95247	0.04753		167.69	0.96373	0.03627		181.284	0.57667	0.42333		181.284	0.59428	0.40572		180.575	0.61583	0.38417
										181.543	0.58203	0.41797		181.537	0.66434	0.33566		181.542	0.72588	0.27412		181.543	0.78411	0.21589		181.56	0.86273	0.13727		167.925	0.94832	0.05168		167.927	0.9616	0.0384		181.541	0.57602	0.42398		181.54	0.56367	0.43633		180.829	0.62536	0.37464
										181.799	0.59413	0.40587		181.793	0.66188	0.33812		181.798	0.73322	0.26678		181.798	0.76362	0.23638		181.816	0.86331	0.13669		168.162	0.9476	0.0524		168.164	0.95858	0.04142		181.796	0.57898	0.42102		181.796	0.61181	0.38819		181.085	0.63485	0.36515
										182.055	0.58142	0.41858		182.049	0.65318	0.34682		182.054	0.6844	0.3156		182.055	0.77008	0.22992		182.072	0.86884	0.13116		168.399	0.9435	0.0565		168.401	0.95543	0.04457		182.052	0.57357	0.42643		182.051	0.57396	0.42604		181.34	0.61411	0.38589
										182.311	0.55366	0.44634		182.306	0.66023	0.33977		182.31	0.72265	0.27735		182.311	0.89224	0.10776		182.328	0.85918	0.14082		168.635	0.94682	0.05318		168.638	0.94618	0.05382		182.308	0.57554	0.42446		182.309	0.58621	0.41379		181.595	0.63205	0.36795
										182.566	0.57948	0.42052		182.562	0.6519	0.3481		182.567	0.73009	0.26991		182.566	0.77822	0.22178		182.583	0.86701	0.13299		168.872	0.94901	0.05099		168.875	0.95851	0.04149		182.566	0.712	0.288		182.564	0.56909	0.43091		181.85	0.61082	0.38918
										182.823	0.56455	0.43545		182.817	0.65862	0.34138		182.823	0.729	0.271		182.822	0.76089	0.23911		182.84	0.86471	0.13529		169.109	0.97023	0.02977		169.113	0.96207	0.03793		182.82	0.57219	0.42781		182.82	0.52567	0.47433		182.105	0.62615	0.37385
										183.079	0.5761	0.4239		183.073	0.65804	0.34196		183.079	0.71991	0.28009		183.078	0.76215	0.23785		183.096	0.86728	0.13272		169.346	0.96053	0.03947		169.348	0.94853	0.05147		183.077	0.57437	0.42563		183.076	0.56325	0.43675		182.36	0.60943	0.39057
										183.335	0.55949	0.44051		183.329	0.65643	0.34357		183.335	0.72053	0.27947		183.335	0.76512	0.23488		183.352	0.86397	0.13603		169.583	0.95355	0.04645		169.585	0.95208	0.04792		183.334	0.573	0.427		183.332	0.57752	0.42248		182.616	0.62052	0.37948
										183.592	0.57702	0.42298		183.586	0.65632	0.34368		183.591	0.72819	0.27181		183.591	0.79711	0.20289		183.608	0.86452	0.13548		169.82	0.94436	0.05564		169.822	0.96203	0.03797		183.589	0.57491	0.42509		183.588	0.59456	0.40544		182.871	0.62409	0.37591
										183.847	0.58072	0.41928		183.841	0.6644	0.3356		183.847	0.72644	0.27356		183.846	0.76405	0.23595		183.864	0.86565	0.13435		170.057	0.96714	0.03286		170.059	0.96139	0.03861		183.845	0.58379	0.41621		183.845	0.58129	0.41871		183.126	0.516	0.484
										184.104	0.55806	0.44194		184.097	0.65376	0.34624		184.103	0.71409	0.28591		184.102	0.77355	0.22645		184.12	0.86173	0.13827		170.293	0.95628	0.04372		170.295	0.95666	0.04334		184.102	0.64833	0.35167		184.1	0.5795	0.4205		183.38	0.62713	0.37287
										184.359	0.58718	0.41282		184.353	0.65936	0.34064		184.36	0.7329	0.2671		184.358	0.76749	0.23251		184.376	0.87109	0.12891		170.53	0.94493	0.05507		170.532	0.95722	0.04278		184.358	0.56375	0.43625		184.357	0.58728	0.41272		183.635	0.61137	0.38863
										184.615	0.56988	0.43012		184.609	0.65426	0.34574		184.615	0.72523	0.27477		184.615	0.77576	0.22424		184.632	0.86128	0.13872		170.767	0.95184	0.04816		170.77	0.9622	0.0378		184.613	0.57496	0.42504		184.612	0.54196	0.45804		183.89	0.61914	0.38086
										184.871	0.5785	0.4215		184.865	0.65124	0.34876		184.872	0.73931	0.26069		184.87	0.8037	0.1963		184.889	0.8661	0.1339		171.005	0.95864	0.04136		171.007	0.95551	0.04449		184.869	0.56446	0.43554		184.869	0.5726	0.4274		184.146	0.61456	0.38544
										185.127	0.57558	0.42442		185.122	0.65214	0.34786		185.128	0.7081	0.2919		185.127	0.78008	0.21992		185.144	0.86316	0.13684		171.24	0.93639	0.06361		171.243	0.93625	0.06375		185.125	0.46753	0.53247		185.125	0.57091	0.42909		184.401	0.60863	0.39137
										185.383	0.57401	0.42599		185.377	0.6695	0.3305		185.383	0.73253	0.26747		185.383	0.78534	0.21466		185.401	0.86456	0.13544		171.477	0.94925	0.05075		171.479	0.96391	0.03609		185.381	0.58076	0.41924		185.381	0.59558	0.40442		184.656	0.62041	0.37959
										185.639	0.55962	0.44038		185.633	0.65506	0.34494		185.64	0.72631	0.27369		185.639	0.76179	0.23821		185.657	0.86942	0.13058		171.715	0.9572	0.0428		171.716	0.96219	0.03781		185.638	0.56829	0.43171		185.636	0.58274	0.41726		184.91	0.61059	0.38941
										185.896	0.58198	0.41802		185.889	0.65159	0.34841		185.896	0.73659	0.26341		185.895	0.78534	0.21466		185.912	0.86915	0.13085		171.951	0.95406	0.04594		171.954	0.95665	0.04335		185.894	0.57877	0.42123		185.893	0.60234	0.39766		185.166	0.61481	0.38519
										186.152	0.5858	0.4142		186.146	0.66692	0.33308		186.151	0.72194	0.27806		186.152	0.78887	0.21113		186.168	0.86765	0.13235		172.188	0.96496	0.03504		172.191	0.93129	0.06871		186.149	0.56274	0.43726		186.148	0.58439	0.41561		185.42	0.67478	0.32522
										186.408	0.56277	0.43723		186.402	0.66237	0.33763		186.408	0.59941	0.40059		186.407	0.77942	0.22058		186.424	0.84551	0.15449		172.424	0.95602	0.04398		172.428	0.95443	0.04557		186.406	0.57631	0.42369		186.405	0.58387	0.41613		185.676	0.61112	0.38888
										186.663	0.56488	0.43512		186.658	0.65276	0.34724		186.663	0.72358	0.27642		186.663	0.78892	0.21108		186.681	0.81272	0.18728		172.662	0.94459	0.05541		172.664	0.95765	0.04235		186.662	0.5818	0.4182		186.661	0.5543	0.4457		185.931	0.62611	0.37389
										186.92	0.58112	0.41888		186.915	0.65413	0.34587		186.919	0.72746	0.27254		186.919	0.77745	0.22255		186.937	0.82676	0.17324		172.899	0.93803	0.06197		172.901	0.94088	0.05912		186.917	0.5636	0.4364		186.917	0.60086	0.39914		186.186	0.62952	0.37048
										187.176	0.56785	0.43215		187.17	0.64928	0.35072		187.176	0.72622	0.27378		187.176	0.80512	0.19488		187.193	0.84471	0.15529		173.136	0.95315	0.04685		173.137	0.94724	0.05276		187.174	0.56072	0.43928		187.173	0.60245	0.39755		186.441	0.61838	0.38162
										187.432	0.5776	0.4224		187.426	0.65957	0.34043		187.432	0.85752	0.14248		187.432	0.78467	0.21533		187.449	0.85342	0.14658		173.372	0.93968	0.06032		173.375	0.95474	0.04526		187.43	0.55693	0.44307		187.429	0.57243	0.42757		186.696	0.61484	0.38516
										187.689	0.5763	0.4237		187.683	0.66772	0.33228		187.688	0.70434	0.29566		187.687	0.7151	0.2849		187.705	0.84961	0.15039		173.609	0.95245	0.04755		173.611	0.96205	0.03795		187.686	0.5586	0.4414		187.685	0.57064	0.42936		186.951	0.61195	0.38805
										187.944	0.57519	0.42481		187.939	0.65044	0.34956		187.944	0.71445	0.28555		187.943	0.78144	0.21856		187.961	0.85275	0.14725		173.846	0.94794	0.05206		173.848	0.93568	0.06432		187.942	0.56555	0.43445		187.941	0.57569	0.42431		187.206	0.61183	0.38817
										188.2	0.58391	0.41609		188.194	0.65426	0.34574		188.2	0.7235	0.2765		188.2	0.73682	0.26318		188.217	0.85744	0.14256		174.083	0.95484	0.04516		174.085	0.9573	0.0427		188.198	0.55997	0.44003		188.198	0.56528	0.43472		187.461	0.61535	0.38465
										188.456	0.56076	0.43924		188.45	0.65185	0.34815		188.456	0.71725	0.28275		188.456	0.78338	0.21662		188.473	0.86167	0.13833		174.32	0.94458	0.05542		174.322	0.94976	0.05024		188.454	0.57524	0.42476		188.453	0.57098	0.42902		187.716	0.62964	0.37036
										188.712	0.56411	0.43589		188.706	0.65038	0.34962		188.712	0.72256	0.27744		188.712	0.77251	0.22749		188.729	0.85836	0.14164		174.556	0.94474	0.05526		174.559	0.95116	0.04884		188.71	0.55467	0.44533		188.709	0.60334	0.39666		187.971	0.62052	0.37948
										188.969	0.5877	0.4123		188.963	0.65631	0.34369		188.969	0.72084	0.27916		188.967	0.75654	0.24346		188.986	0.86731	0.13269		174.793	0.95392	0.04608		174.796	0.95069	0.04931		188.966	0.5626	0.4374		188.965	0.57177	0.42823		188.226	0.61834	0.38166
										189.224	0.54955	0.45045		189.218	0.6517	0.3483		189.224	0.72677	0.27323		189.223	0.77467	0.22533		189.241	0.86359	0.13641		175.03	0.95742	0.04258		175.032	0.94152	0.05848		189.222	0.56282	0.43718		189.221	0.57242	0.42758		188.481	0.6075	0.3925
										189.481	0.57197	0.42803		189.475	0.64282	0.35718		189.48	0.72951	0.27049		189.48	0.76546	0.23454		189.497	0.85402	0.14598		175.267	0.95447	0.04553		175.269	0.96608	0.03392		189.478	0.56945	0.43055		189.478	0.5868	0.4132		188.737	0.60842	0.39158
										189.736	0.56129	0.43871		189.731	0.64804	0.35196		189.736	0.71495	0.28505		189.735	0.77287	0.22713		189.753	0.84043	0.15957		175.505	0.96566	0.03434		175.506	0.94338	0.05662		189.734	0.56324	0.43676		189.734	0.57944	0.42056		188.992	0.62767	0.37233
										189.992	0.57436	0.42564		189.987	0.6525	0.3475		189.992	0.67503	0.32497		189.992	0.7745	0.2255		190.01	0.86858	0.13142		175.741	0.94861	0.05139		175.744	0.9468	0.0532		189.99	0.57504	0.42496		189.989	0.58971	0.41029		189.247	0.60621	0.39379
										190.248	0.56384	0.43616		190.242	0.66262	0.33738		190.248	0.7094	0.2906		190.248	0.77701	0.22299		190.265	0.86245	0.13755		175.978	0.95676	0.04324		175.981	0.95086	0.04914		190.246	0.60079	0.39921		190.245	0.5816	0.4184		189.501	0.61722	0.38278
										190.504	0.56233	0.43767		190.499	0.64369	0.35631		190.505	0.73693	0.26307		190.504	0.76643	0.23357		190.522	0.85832	0.14168		176.215	0.94376	0.05624		176.216	0.95837	0.04163		190.502	0.56779	0.43221		190.502	0.57719	0.42281		189.757	0.58493	0.41507
										190.761	0.59799	0.40201		190.754	0.64045	0.35955		190.76	0.71381	0.28619		190.759	0.76905	0.23095		190.777	0.84298	0.15702		176.452	0.94577	0.05423		176.453	0.90618	0.09382		190.758	0.62594	0.37406		190.758	0.54537	0.45463		190.011	0.60921	0.39079
										191.016	0.5849	0.4151		191.011	0.64324	0.35676		191.016	0.71622	0.28378		191.016	0.78192	0.21808		191.034	0.86092	0.13908		176.689	0.93324	0.06676		176.691	0.94148	0.05852		191.014	0.48085	0.51915		191.013	0.59603	0.40397		190.267	0.60879	0.39121
										191.272	0.56113	0.43887		191.267	0.64975	0.35025		191.272	0.72136	0.27864		191.272	0.78085	0.21915		191.29	0.858	0.142		176.925	0.9583	0.0417		176.927	0.95055	0.04945		191.27	0.56371	0.43629		191.27	0.54631	0.45369		190.522	0.60754	0.39246
										191.529	0.60259	0.39741		191.523	0.64409	0.35591		191.529	0.71485	0.28515		191.528	0.77898	0.22102		191.546	0.8574	0.1426		177.161	0.95367	0.04633		177.165	0.96391	0.03609		191.527	0.5641	0.4359		191.525	0.57128	0.42872		190.776	0.61761	0.38239
										191.784	0.57397	0.42603		191.779	0.65104	0.34896		191.784	0.72381	0.27619		191.784	0.77161	0.22839		191.802	0.84525	0.15475		177.399	0.95068	0.04932		177.4	0.95163	0.04837		191.783	0.56854	0.43146		191.782	0.56613	0.43387		191.032	0.58397	0.41603
										192.041	0.57139	0.42861		192.035	0.65652	0.34348		192.041	0.71579	0.28421		192.04	0.77238	0.22762		192.057	0.84938	0.15062		177.636	0.95898	0.04102		177.638	0.95633	0.04367		192.038	0.563	0.437		192.038	0.5682	0.4318		191.287	0.61431	0.38569
										192.297	0.57123	0.42877		192.292	0.64247	0.35753		192.297	0.71472	0.28528		192.296	0.72908	0.27092		192.314	0.85824	0.14176		177.873	0.95645	0.04355		177.875	0.94803	0.05197		192.295	0.5502	0.4498		192.294	0.57506	0.42494		191.541	0.58546	0.41454
										192.553	0.57096	0.42904		192.547	0.64804	0.35196		192.553	0.7126	0.2874		192.552	0.78012	0.21988		192.57	0.84629	0.15371		178.109	0.95203	0.04797		178.112	0.95676	0.04324		192.551	0.56037	0.43963		192.55	0.58162	0.41838		191.797	0.60539	0.39461
										192.809	0.54882	0.45118		192.803	0.63994	0.36006		192.809	0.76651	0.23349		192.808	0.77523	0.22477		192.826	0.85241	0.14759		178.346	0.94271	0.05729		178.348	0.95185	0.04815		192.807	0.55338	0.44662		192.806	0.57153	0.42847		192.052	0.62486	0.37514
										193.065	0.56712	0.43288		193.059	0.64622	0.35378		193.066	0.69744	0.30256		193.064	0.76885	0.23115		193.082	0.86115	0.13885		178.583	0.95786	0.04214		178.585	0.95013	0.04987		193.063	0.57307	0.42693		193.062	0.57993	0.42007		192.307	0.6099	0.3901
										193.321	0.58111	0.41889		193.316	0.65148	0.34852		193.321	0.70292	0.29708		193.321	0.7763	0.2237		193.338	0.86153	0.13847		178.82	0.96267	0.03733		178.822	0.95753	0.04247		193.318	0.57612	0.42388		193.318	0.6026	0.3974		192.562	0.60886	0.39114
										193.577	0.55043	0.44957		193.572	0.6503	0.3497		193.576	0.71159	0.28841		193.576	0.74079	0.25921		193.595	0.8563	0.1437		179.057	0.93262	0.06738		179.059	0.95215	0.04785		193.575	0.55168	0.44832		193.574	0.56134	0.43866		192.817	0.61324	0.38676
										193.833	0.5639	0.4361		193.827	0.64529	0.35471		193.833	0.71	0.29		193.832	0.7701	0.2299		193.85	0.85835	0.14165		179.294	0.94884	0.05116		179.296	0.95419	0.04581		193.831	0.48991	0.51009		193.83	0.57439	0.42561		193.072	0.61703	0.38297
										194.089	0.57686	0.42314		194.083	0.64782	0.35218		194.089	0.71509	0.28491		194.088	0.83449	0.16551		194.106	0.86562	0.13438		179.53	0.95017	0.04983		179.533	0.96035	0.03965		194.087	0.57455	0.42545		194.086	0.50723	0.49277		193.327	0.60232	0.39768
										194.345	0.52055	0.47945		194.34	0.63991	0.36009		194.345	0.72017	0.27983		194.345	0.77132	0.22868		194.362	0.86459	0.13541		179.767	0.951	0.049		179.771	0.94993	0.05007		194.342	0.57644	0.42356		194.342	0.61238	0.38762		193.583	0.61165	0.38835
										194.601	0.55333	0.44667		194.595	0.65409	0.34591		194.601	0.72134	0.27866		194.601	0.75909	0.24091		194.618	0.86604	0.13396		180.004	0.94015	0.05985		180.007	0.96	0.04		194.6	0.5643	0.4357		194.598	0.57581	0.42419		193.837	0.61073	0.38927
										194.857	0.59394	0.40606		194.851	0.64897	0.35103		194.858	0.70568	0.29432		194.857	0.76954	0.23046		194.874	0.8443	0.1557		180.242	0.94934	0.05066		180.243	0.95225	0.04775		194.855	0.52527	0.47473		194.854	0.57716	0.42284		194.092	0.60376	0.39624
										195.114	0.58884	0.41116		195.108	0.6353	0.3647		195.113	0.70781	0.29219		195.113	0.77221	0.22779		195.13	0.85303	0.14697		180.478	0.93209	0.06791		180.48	0.94075	0.05925		195.111	0.54448	0.45552		195.11	0.56179	0.43821		194.348	0.61655	0.38345
										195.37	0.57533	0.42467		195.364	0.64583	0.35417		195.37	0.69588	0.30412		195.369	0.726	0.274		195.386	0.86498	0.13502		180.715	0.9469	0.0531		180.718	0.95854	0.04146		195.367	0.57495	0.42505		195.367	0.57213	0.42787		194.603	0.61425	0.38575
										195.625	0.58085	0.41915		195.62	0.64205	0.35795		195.625	0.72593	0.27407		195.625	0.76579	0.23421		195.642	0.84303	0.15697		180.951	0.95275	0.04725		180.955	0.94429	0.05571		195.624	0.56055	0.43945		195.623	0.57281	0.42719		194.858	0.61439	0.38561
										195.882	0.54565	0.45435		195.876	0.64943	0.35057		195.882	0.70445	0.29555		195.88	0.77486	0.22514		195.898	0.84696	0.15304		181.189	0.94023	0.05977		181.192	0.95033	0.04967		195.879	0.55865	0.44135		195.879	0.57871	0.42129		195.113	0.61004	0.38996
										196.138	0.56773	0.43227		196.132	0.63414	0.36586		196.137	0.74283	0.25717		196.137	0.7684	0.2316		196.154	0.85026	0.14974		181.426	0.94996	0.05004		181.427	0.95783	0.04217		196.136	0.54826	0.45174		196.134	0.56673	0.43327		195.368	0.5801	0.4199
										196.393	0.55814	0.44186		196.388	0.64041	0.35959		196.393	0.71467	0.28533		196.393	0.83498	0.16502		196.411	0.85731	0.14269		181.662	0.9501	0.0499		181.665	0.95921	0.04079		196.392	0.598	0.402		196.391	0.55359	0.44641		195.623	0.61071	0.38929
										196.649	0.56459	0.43541		196.644	0.65324	0.34676		196.649	0.71488	0.28512		196.65	0.75574	0.24426		196.667	0.83877	0.16123		181.899	0.95551	0.04449		181.902	0.95402	0.04598		196.647	0.80781	0.19219		196.647	0.58783	0.41217		195.878	0.57805	0.42195
										196.905	0.56211	0.43789		196.9	0.64021	0.35979		196.906	0.7113	0.2887		196.905	0.75691	0.24309		196.922	0.82828	0.17172		182.137	0.95189	0.04811		182.139	0.95357	0.04643		196.903	0.57524	0.42476		196.903	0.58117	0.41883		196.133	0.60643	0.39357
										197.162	0.56224	0.43776		197.155	0.64808	0.35192		197.161	0.70543	0.29457		197.161	0.77128	0.22872		197.179	0.84308	0.15692		182.372	0.94035	0.05965		182.376	0.94729	0.05271		197.16	0.57014	0.42986		197.158	0.55993	0.44007		196.388	0.60477	0.39523
										197.418	0.57286	0.42714		197.411	0.6399	0.3601		197.417	0.69957	0.30043		197.417	0.76856	0.23144		197.435	0.83653	0.16347		182.609	0.95332	0.04668		182.612	0.95326	0.04674		197.416	0.5174	0.4826		197.415	0.56553	0.43447		196.643	0.53444	0.46556
										197.674	0.57065	0.42935		197.668	0.63806	0.36194		197.674	0.72245	0.27755		197.673	0.77323	0.22677		197.69	0.83508	0.16492		182.846	0.95188	0.04812		182.848	0.95098	0.04902		197.672	0.56568	0.43432		197.671	0.55665	0.44335		196.898	0.59859	0.40141
										197.931	0.57417	0.42583		197.924	0.63838	0.36162		197.929	0.70511	0.29489		197.929	0.78476	0.21524		197.947	0.84889	0.15111		183.084	0.94605	0.05395		183.086	0.94798	0.05202		197.927	0.63519	0.36481		197.927	0.55649	0.44351		197.153	0.61459	0.38541
										198.186	0.57641	0.42359		198.18	0.63468	0.36532		198.186	0.72675	0.27325		198.185	0.7433	0.2567		198.203	0.84728	0.15272		183.321	0.95689	0.04311		183.323	0.96023	0.03977		198.183	0.55304	0.44696		198.183	0.57537	0.42463		197.408	0.5989	0.4011
										198.441	0.57853	0.42147		198.436	0.64036	0.35964		198.442	0.71344	0.28656		198.441	0.76907	0.23093		198.459	0.84086	0.15914		183.557	0.94763	0.05237		183.56	0.96647	0.03353		198.44	0.5502	0.4498		198.439	0.5635	0.4365		197.663	0.57165	0.42835
										198.698	0.54008	0.45992		198.693	0.64084	0.35916		198.698	0.70916	0.29084		198.697	0.73532	0.26468		198.715	0.85266	0.14734		183.793	0.94409	0.05591		183.797	0.95727	0.04273		198.696	0.54955	0.45045		198.695	0.586	0.414		197.918	0.59996	0.40004
										198.954	0.5626	0.4374		198.948	0.63677	0.36323		198.954	0.70735	0.29265		198.954	0.77285	0.22715		198.971	0.84859	0.15141		184.031	0.94486	0.05514		184.033	0.97111	0.02889		198.952	0.55703	0.44297		198.951	0.5639	0.4361		198.173	0.58988	0.41012
										199.21	0.56866	0.43134		199.204	0.63132	0.36868		199.209	0.72974	0.27026		199.21	0.75366	0.24634		199.228	0.84618	0.15382		184.268	0.95637	0.04363		184.269	0.94126	0.05874		199.208	0.54139	0.45861		199.207	0.56568	0.43432		198.429	0.61044	0.38956
										199.466	0.55798	0.44202		199.46	0.6374	0.3626		199.465	0.71797	0.28203		199.465	0.76907	0.23093		199.483	0.82136	0.17864		184.505	0.95861	0.04139		184.507	0.9487	0.0513		199.463	0.53722	0.46278		199.463	0.55216	0.44784		198.683	0.61757	0.38243
										199.722	0.58572	0.41428		199.716	0.6503	0.3497		199.723	0.77658	0.22342		199.721	0.75946	0.24054		199.739	0.84373	0.15627		184.741	0.95352	0.04648		184.744	0.94427	0.05573		199.72	0.57716	0.42284		199.719	0.57586	0.42414		198.938	0.6063	0.3937
										199.979	0.5509	0.4491		199.972	0.63556	0.36444		199.978	0.7261	0.2739		199.977	0.76703	0.23297		199.995	0.84614	0.15386		184.978	0.95031	0.04969		184.981	0.94892	0.05108		199.976	0.59418	0.40582		199.976	0.54376	0.45624		199.193	0.60684	0.39316
										200.235	0.56466	0.43534		200.229	0.6444	0.3556		200.234	0.73813	0.26187		200.234	0.76316	0.23684		200.251	0.84826	0.15174		185.215	0.92221	0.07779		185.218	0.95244	0.04756		200.232	0.55323	0.44677		200.231	0.55154	0.44846		199.448	0.6062	0.3938
										200.491	0.56111	0.43889		200.485	0.64176	0.35824		200.49	0.76283	0.23717		200.49	0.75351	0.24649		200.507	0.85907	0.14093		185.453	0.94743	0.05257		185.456	0.95056	0.04944		200.489	0.56072	0.43928		200.487	0.60583	0.39417		199.703	0.59133	0.40867
										200.746	0.58824	0.41176		200.74	0.64552	0.35448		200.746	0.77207	0.22793		200.746	0.71133	0.28867		200.763	0.84016	0.15984		185.69	0.95254	0.04746		185.692	0.95574	0.04426		200.744	0.54871	0.45129		200.743	0.56715	0.43285		199.958	0.61006	0.38994
										201.003	0.56192	0.43808		200.996	0.63956	0.36044		201.003	0.79053	0.20947		201.001	0.75834	0.24166		201.019	0.85664	0.14336		185.926	0.95218	0.04782		185.928	0.94939	0.05061		201.001	0.55613	0.44387		200.999	0.5675	0.4325		200.213	0.58942	0.41058
										201.259	0.58571	0.41429		201.253	0.64327	0.35673		201.258	0.78676	0.21324		201.258	0.7795	0.2205		201.276	0.84329	0.15671		186.163	0.92013	0.07987		186.165	0.96386	0.03614		201.256	0.55602	0.44398		201.255	0.55325	0.44675		200.468	0.60352	0.39648
										201.514	0.57941	0.42059		201.509	0.63746	0.36254		201.514	0.75373	0.24627		201.514	0.76604	0.23396		201.531	0.84348	0.15652		186.399	0.95361	0.04639		186.402	0.9596	0.0404		201.513	0.57944	0.42056		201.512	0.56247	0.43753		200.724	0.59843	0.40157
										201.771	0.56722	0.43278		201.765	0.63218	0.36782		201.771	0.74545	0.25455		201.77	0.84374	0.15626		201.788	0.84009	0.15991		186.636	0.95342	0.04658		186.64	0.95378	0.04622		201.769	0.50533	0.49467		201.767	0.52374	0.47626		200.979	0.60472	0.39528
										202.027	0.56895	0.43105		202.021	0.64101	0.35899		202.027	0.73552	0.26448		202.026	0.73117	0.26883		202.044	0.84777	0.15223		186.874	0.9517	0.0483		186.876	0.94941	0.05059		202.024	0.56708	0.43292		202.024	0.56763	0.43237		201.234	0.56641	0.43359
										202.283	0.59784	0.40216		202.277	0.6275	0.3725		202.282	0.73514	0.26486		202.283	0.76725	0.23275		202.299	0.8437	0.1563		187.11	0.93866	0.06134		187.112	0.9606	0.0394		202.281	0.56897	0.43103		202.28	0.56703	0.43297		201.489	0.61086	0.38914
										202.539	0.55917	0.44083		202.533	0.63046	0.36954		202.539	0.71965	0.28035		202.538	0.77487	0.22513		202.556	0.85439	0.14561		187.346	0.95048	0.04952		187.35	0.95771	0.04229		202.536	0.56214	0.43786		202.536	0.56837	0.43163		201.744	0.603	0.397
										202.795	0.585	0.415		202.789	0.64812	0.35188		202.795	0.71643	0.28357		202.794	0.72355	0.27645		202.812	0.85326	0.14674		187.584	0.94291	0.05709		187.586	0.95505	0.04495		202.792	0.58338	0.41662		202.792	0.55551	0.44449		201.998	0.60356	0.39644
										203.051	0.56838	0.43162		203.044	0.63643	0.36357		203.05	0.71044	0.28956		203.05	0.76087	0.23913		203.067	0.85109	0.14891		187.82	0.93905	0.06095		187.823	0.94958	0.05042		203.048	0.72458	0.27542		203.048	0.56087	0.43913		202.254	0.60574	0.39426
										203.307	0.57366	0.42634		203.301	0.63839	0.36161		203.306	0.71958	0.28042		203.306	0.76363	0.23637		203.324	0.83944	0.16056		188.057	0.97134	0.02866		188.059	0.95101	0.04899		203.305	0.63655	0.36345		203.304	0.56117	0.43883		202.509	0.61415	0.38585
										203.563	0.54152	0.45848		203.556	0.63622	0.36378		203.563	0.60407	0.39593		203.563	0.76822	0.23178		203.579	0.84987	0.15013		188.294	0.94102	0.05898		188.297	0.95677	0.04323		203.561	0.48203	0.51797		203.559	0.55788	0.44212		202.764	0.60368	0.39632
										203.819	0.56127	0.43873		203.814	0.64393	0.35607		203.818	0.71953	0.28047		203.819	0.76387	0.23613		203.836	0.84683	0.15317		188.531	0.95239	0.04761		188.533	0.93732	0.06268		203.817	0.52264	0.47736		203.816	0.57807	0.42193		203.019	0.60641	0.39359
										204.075	0.51181	0.48819		204.07	0.63974	0.36026		204.075	0.75225	0.24775		204.075	0.75528	0.24472		204.092	0.85271	0.14729		188.768	0.95707	0.04293		188.771	0.95189	0.04811		204.073	0.55556	0.44444		204.073	0.57124	0.42876		203.274	0.61021	0.38979
										204.331	0.56875	0.43125		204.326	0.63405	0.36595		204.331	0.45367	0.54633		204.33	0.7649	0.2351		204.347	0.85419	0.14581		189.004	0.94082	0.05918		189.008	0.96136	0.03864		204.329	0.5631	0.4369		204.329	0.57931	0.42069		203.529	0.61965	0.38035
										204.587	0.56401	0.43599		204.581	0.64075	0.35925		204.587	0.9019	0.0981		204.586	0.76133	0.23867		204.604	0.85511	0.14489		189.242	0.95225	0.04775		189.244	0.95624	0.04376		204.584	0.54834	0.45166		204.584	0.5557	0.4443		203.784	0.59154	0.40846
										204.843	0.55588	0.44412		204.837	0.63481	0.36519		204.843	0.72821	0.27179		204.842	0.76541	0.23459		204.86	0.85558	0.14442		189.478	0.95403	0.04597		189.481	0.93595	0.06405		204.841	0.55627	0.44373		204.84	0.55854	0.44146		204.039	0.60149	0.39851
										205.1	0.55833	0.44167		205.094	0.63524	0.36476		205.099	0.76178	0.23822		205.099	0.76487	0.23513		205.116	0.85131	0.14869		189.716	0.94502	0.05498		189.718	0.94741	0.05259		205.097	0.59645	0.40355		205.097	0.53396	0.46604		204.294	0.60728	0.39272
										205.355	0.56777	0.43223		205.35	0.62611	0.37389		205.354	0.75119	0.24881		205.355	0.75745	0.24255		205.372	0.844	0.156		189.951	0.95228	0.04772		189.954	0.95069	0.04931		205.353	0.5441	0.4559		205.352	0.54088	0.45912		204.549	0.69601	0.30399
										205.612	0.54937	0.45063		205.606	0.63152	0.36848		205.611	0.72921	0.27079		205.611	0.75862	0.24138		205.628	0.8483	0.1517		190.189	0.94608	0.05392		190.193	0.93836	0.06164		205.609	0.53497	0.46503		205.609	0.54995	0.45005		204.805	0.60896	0.39104
										205.868	0.57122	0.42878		205.862	0.65286	0.34714		205.867	0.76737	0.23263		205.866	0.76867	0.23133		205.884	0.8475	0.1525		190.426	0.95629	0.04371		190.429	0.94896	0.05104		205.865	0.55224	0.44776		205.865	0.55148	0.44852		205.059	0.61116	0.38884
										206.124	0.55615	0.44385		206.117	0.63939	0.36061		206.124	0.77695	0.22305		206.123	0.74978	0.25022		206.141	0.85257	0.14743		190.662	0.94482	0.05518		190.665	0.94538	0.05462		206.121	0.56317	0.43683		206.121	0.55547	0.44453		205.315	0.62301	0.37699
										206.381	0.52646	0.47354		206.374	0.63824	0.36176		206.379	0.74535	0.25465		206.378	0.7527	0.2473		206.396	0.84183	0.15817		190.899	0.96467	0.03533		190.902	0.96448	0.03552		206.378	0.55638	0.44362		206.376	0.56021	0.43979		205.57	0.59093	0.40907
										206.637	0.58105	0.41895		206.629	0.62783	0.37217		206.635	0.73286	0.26714		206.635	0.75844	0.24156		206.652	0.85274	0.14726		191.136	0.93792	0.06208		191.139	0.95029	0.04971		206.634	0.60357	0.39643		206.633	0.56657	0.43343		205.825	0.60394	0.39606
										206.892	0.57937	0.42063		206.886	0.64301	0.35699		206.891	0.73717	0.26283		206.891	0.72611	0.27389		206.908	0.84917	0.15083		191.373	0.95187	0.04813		191.376	0.9345	0.0655		206.889	0.69409	0.30591		206.889	0.55936	0.44064		206.08	0.60941	0.39059
										207.148	0.56843	0.43157		207.142	0.63913	0.36087		207.148	0.73524	0.26476		207.147	0.76831	0.23169		207.164	0.84207	0.15793		191.611	0.94752	0.05248		191.612	0.94959	0.05041		207.145	0.56058	0.43942		207.144	0.57001	0.42999		206.334	0.61808	0.38192
										207.404	0.55644	0.44356		207.397	0.63552	0.36448		207.403	0.72918	0.27082		207.403	0.76697	0.23303		207.421	0.85302	0.14698		191.848	0.95411	0.04589		191.849	0.96545	0.03455		207.402	0.51016	0.48984		207.4	0.557	0.443		206.589	0.62452	0.37548
										207.661	0.57113	0.42887		207.654	0.63599	0.36401		207.66	0.73427	0.26573		207.659	0.74874	0.25126		207.676	0.85688	0.14312		192.084	0.948	0.052		192.087	0.93861	0.06139		207.658	0.49119	0.50881		207.656	0.55033	0.44967		206.845	0.5968	0.4032
										207.916	0.56223	0.43777		207.91	0.6346	0.3654		207.916	0.75601	0.24399		207.915	0.75438	0.24562		207.933	0.84957	0.15043		192.321	0.94684	0.05316		192.323	0.93657	0.06343		207.913	0.55679	0.44321		207.913	0.55344	0.44656		207.1	0.60919	0.39081
										208.173	0.55179	0.44821		208.167	0.63241	0.36759		208.172	0.71794	0.28206		208.171	0.7903	0.2097		208.189	0.84301	0.15699		192.558	0.95037	0.04963		192.56	0.94105	0.05895		208.17	0.5388	0.4612		208.168	0.51101	0.48899		207.354	0.60476	0.39524
										208.428	0.54862	0.45138		208.422	0.6384	0.3616		208.428	0.73797	0.26203		208.427	0.76004	0.23996		208.444	0.85047	0.14953		192.795	0.95308	0.04692		192.797	0.94546	0.05454		208.426	0.54893	0.45107		208.426	0.5539	0.4461		207.609	0.61252	0.38748
										208.685	0.56542	0.43458		208.678	0.63013	0.36987		208.684	0.75529	0.24471		208.684	0.82885	0.17115		208.701	0.84981	0.15019		193.032	0.93801	0.06199		193.034	0.95203	0.04797		208.681	0.59933	0.40067		208.681	0.57629	0.42371		207.864	0.61089	0.38911
										208.942	0.5675	0.4325		208.935	0.63368	0.36632		208.94	0.73718	0.26282		208.94	0.76202	0.23798		208.956	0.84564	0.15436		193.268	0.94515	0.05485		193.271	0.95416	0.04584		208.937	0.55139	0.44861		208.937	0.56098	0.43902		208.121	0.61441	0.38559
										209.197	0.56039	0.43961		209.19	0.63099	0.36901		209.196	0.73869	0.26131		209.195	0.84692	0.15308		209.213	0.84926	0.15074		193.505	0.94184	0.05816		193.508	0.94579	0.05421		209.193	0.56023	0.43977		209.194	0.54079	0.45921		208.374	0.60414	0.39586
										209.453	0.55773	0.44227		209.447	0.63176	0.36824		209.452	0.77339	0.22661		209.451	0.7524	0.2476		209.469	0.83645	0.16355		193.741	0.94375	0.05625		193.745	0.94627	0.05373		209.45	0.54663	0.45337		209.449	0.52395	0.47605		208.63	0.58827	0.41173
										209.709	0.56294	0.43706		209.702	0.6347	0.3653		209.708	0.73498	0.26502		209.708	0.75638	0.24362		209.725	0.85398	0.14602		193.979	0.93552	0.06448		193.982	0.94315	0.05685		209.706	0.5608	0.4392		209.706	0.55359	0.44641		208.885	0.59627	0.40373
										209.965	0.55844	0.44156		209.959	0.63196	0.36804		209.964	0.72547	0.27453		209.963	0.75312	0.24688		209.981	0.85261	0.14739		194.216	0.94237	0.05763		194.218	0.94624	0.05376		209.962	0.55612	0.44388		209.961	0.56311	0.43689		209.14	0.58739	0.41261
										210.221	0.60062	0.39938		210.214	0.63533	0.36467		210.22	0.72409	0.27591		210.219	0.74052	0.25948		210.237	0.84541	0.15459		194.452	0.95135	0.04865		194.455	0.95349	0.04651		210.218	0.46217	0.53783		210.218	0.55749	0.44251		209.395	0.59329	0.40671
										210.477	0.57749	0.42251		210.471	0.63456	0.36544		210.477	0.72935	0.27065		210.476	0.73919	0.26081		210.493	0.8466	0.1534		194.689	0.94	0.06		194.692	0.9399	0.0601		210.474	0.554	0.446		210.473	0.51587	0.48413		209.651	0.5899	0.4101
										210.733	0.53023	0.46977		210.727	0.64053	0.35947		210.732	0.74018	0.25982		210.731	0.73732	0.26268		210.749	0.8593	0.1407		194.926	0.95112	0.04888		194.929	0.95044	0.04956		210.73	0.56108	0.43892		210.729	0.57388	0.42612		209.906	0.59723	0.40277
										210.989	0.55577	0.44423		210.982	0.62576	0.37424		210.989	0.73329	0.26671		210.988	0.76257	0.23743		211.006	0.85594	0.14406		195.163	0.94596	0.05404		195.165	0.9591	0.0409		210.987	0.55204	0.44796		210.986	0.55484	0.44516		210.16	0.5976	0.4024
										211.245	0.58115	0.41885		211.238	0.63449	0.36551		211.245	0.7318	0.2682		211.244	0.75368	0.24632		211.261	0.84195	0.15805		195.399	0.95739	0.04261		195.402	0.94133	0.05867		211.243	0.62893	0.37107		211.241	0.54225	0.45775		210.415	0.61372	0.38628
										211.501	0.55197	0.44803		211.494	0.63559	0.36441		211.5	0.71458	0.28542		211.499	0.75057	0.24943		211.517	0.83451	0.16549		195.637	0.95052	0.04948		195.639	0.93098	0.06902		211.499	0.55852	0.44148		211.498	0.56096	0.43904		210.67	0.62046	0.37954
										211.757	0.53933	0.46067		211.75	0.63003	0.36997		211.757	0.72297	0.27703		211.756	0.75708	0.24292		211.773	0.83716	0.16284		195.873	0.95016	0.04984		195.877	0.94923	0.05077		211.754	0.5439	0.4561		211.754	0.53314	0.46686		210.925	0.5925	0.4075
										212.014	0.53848	0.46152		212.007	0.62785	0.37215		212.013	0.7197	0.2803		212.012	0.49108	0.50892		212.029	0.84751	0.15249		196.11	0.94738	0.05262		196.113	0.94368	0.05632		212.01	0.54798	0.45202		212.009	0.542	0.458		211.181	0.59566	0.40434
										212.27	0.55461	0.44539		212.263	0.64737	0.35263		212.269	0.76256	0.23744		212.267	0.75239	0.24761		212.285	0.84773	0.15227		196.347	0.94697	0.05303		196.349	0.94228	0.05772		212.266	0.6033	0.3967		212.265	0.54425	0.45575		211.435	0.5877	0.4123
										212.526	0.56592	0.43408		212.518	0.62841	0.37159		212.524	0.85729	0.14271		212.524	0.75368	0.24632		212.542	0.83809	0.16191		196.584	0.95082	0.04918		196.586	0.94521	0.05479		212.522	0.55574	0.44426		212.521	0.55515	0.44485		211.691	0.6177	0.3823
										212.782	0.52396	0.47604		212.775	0.62866	0.37134		212.78	0.69241	0.30759		212.78	0.76376	0.23624		212.797	0.83518	0.16482		196.822	0.94534	0.05466		196.824	0.9425	0.0575		212.778	0.51994	0.48006		212.777	0.55033	0.44967		211.946	0.60601	0.39399
										213.038	0.5329	0.4671		213.03	0.62254	0.37746		213.037	0.71171	0.28829		213.036	0.75155	0.24845		213.053	0.84749	0.15251		197.058	0.95848	0.04152		197.06	0.93566	0.06434		213.035	0.58344	0.41656		213.034	0.55215	0.44785		212.201	0.60133	0.39867
										213.294	0.5656	0.4344		213.287	0.63424	0.36576		213.292	0.70275	0.29725		213.292	0.75304	0.24696		213.31	0.84611	0.15389		197.294	0.93474	0.06526		197.297	0.93195	0.06805		213.291	0.55745	0.44255		213.29	0.55327	0.44673		212.457	0.4528	0.5472
										213.55	0.52421	0.47579		213.543	0.63348	0.36652		213.548	0.706	0.294		213.549	0.76461	0.23539		213.566	0.83896	0.16104		197.532	0.95001	0.04999		197.534	0.94404	0.05596		213.546	0.55981	0.44019		213.546	0.57099	0.42901		212.711	0.60542	0.39458
										213.806	0.5592	0.4408		213.799	0.63483	0.36517		213.805	0.69908	0.30092		213.804	0.74729	0.25271		213.822	0.84728	0.15272		197.768	0.95672	0.04328		197.77	0.94473	0.05527		213.802	0.55168	0.44832		213.802	0.57425	0.42575		212.965	0.58114	0.41886
										214.062	0.53837	0.46163		214.056	0.62781	0.37219		214.06	0.70686	0.29314		214.06	0.75902	0.24098		214.078	0.84284	0.15716		198.004	0.95503	0.04497		198.007	0.94723	0.05277		214.059	0.54646	0.45354		214.058	0.54622	0.45378		213.221	0.58882	0.41118
										214.318	0.59242	0.40758		214.311	0.63029	0.36971		214.316	0.70683	0.29317		214.317	0.75659	0.24341		214.334	0.83583	0.16417		198.242	0.94569	0.05431		198.245	0.94966	0.05034		214.314	0.37586	0.62414		214.314	0.55366	0.44634		213.476	0.58523	0.41477
										214.575	0.56471	0.43529		214.567	0.62786	0.37214		214.573	0.69582	0.30418		214.572	0.74852	0.25148		214.59	0.84942	0.15058		198.478	0.95055	0.04945		198.482	0.93933	0.06067		214.571	0.54875	0.45125		214.57	0.53884	0.46116		213.731	0.59838	0.40162
										214.83	0.53501	0.46499		214.823	0.61991	0.38009		214.829	0.70046	0.29954		214.828	0.7521	0.2479		214.847	0.83958	0.16042		198.716	0.9556	0.0444		198.719	0.94845	0.05155		214.827	0.54891	0.45109		214.826	0.56566	0.43434		213.986	0.60388	0.39612
										215.086	0.54555	0.45445		215.08	0.62973	0.37027		215.085	0.69858	0.30142		215.085	0.78553	0.21447		215.102	0.84549	0.15451		198.952	0.9486	0.0514		198.954	0.94979	0.05021		215.083	0.5311	0.4689		215.082	0.56144	0.43856		214.241	0.71868	0.28132
										215.343	0.53864	0.46136		215.336	0.62404	0.37596		215.34	0.70394	0.29606		215.341	0.70985	0.29015		215.358	0.8406	0.1594		199.19	0.9436	0.0564		199.191	0.94769	0.05231		215.338	0.54448	0.45552		215.338	0.56528	0.43472		214.496	0.60873	0.39127
										215.598	0.55921	0.44079		215.592	0.62691	0.37309		215.597	0.70315	0.29685		215.597	0.68079	0.31921		215.614	0.84346	0.15654		199.426	0.94181	0.05819		199.429	0.94504	0.05496		215.596	0.597	0.403		215.595	0.56421	0.43579		214.752	0.59206	0.40794
										215.854	0.56696	0.43304		215.847	0.6268	0.3732		215.853	0.69578	0.30422		215.853	0.76475	0.23525		215.87	0.8375	0.1625		199.663	0.94571	0.05429		199.666	0.94318	0.05682		215.851	0.53786	0.46214		215.85	0.54628	0.45372		215.007	0.59066	0.40934
										216.11	0.56633	0.43367		216.104	0.61867	0.38133		216.11	0.68713	0.31287		216.109	0.72581	0.27419		216.126	0.84828	0.15172		199.899	0.95451	0.04549		199.902	0.94244	0.05756		216.107	0.58711	0.41289		216.107	0.53789	0.46211		215.262	0.61433	0.38567
										216.367	0.5332	0.4668		216.36	0.62522	0.37478		216.366	0.69701	0.30299		216.365	0.73147	0.26853		216.382	0.84964	0.15036		200.138	0.94869	0.05131		200.139	0.95018	0.04982		216.363	0.55349	0.44651		216.362	0.56643	0.43357		215.517	0.61586	0.38414
										216.623	0.56279	0.43721		216.615	0.63109	0.36891		216.622	0.6973	0.3027		216.621	0.74599	0.25401		216.639	0.84741	0.15259		200.372	0.95022	0.04978		200.376	0.942	0.058		216.619	0.54005	0.45995		216.619	0.57023	0.42977		215.771	0.6037	0.3963
										216.879	0.52404	0.47596		216.871	0.62219	0.37781		216.877	0.68722	0.31278		216.877	0.71966	0.28034		216.894	0.83911	0.16089		200.61	0.93497	0.06503		200.614	0.92923	0.07077		216.876	0.58512	0.41488		216.874	0.53024	0.46976		216.027	0.6028	0.3972
										217.135	0.53982	0.46018		217.128	0.62759	0.37241		217.134	0.69608	0.30392		217.133	0.74529	0.25471		217.15	0.84717	0.15283		200.846	0.93819	0.06181		200.85	0.95659	0.04341		217.132	0.55009	0.44991		217.131	0.53349	0.46651		216.282	0.59351	0.40649
										217.391	0.55757	0.44243		217.384	0.62305	0.37695		217.389	0.6847	0.3153		217.389	0.75317	0.24683		217.406	0.84632	0.15368		201.084	0.94592	0.05408		201.086	0.9373	0.0627		217.388	0.59012	0.40988		217.387	0.53754	0.46246		216.537	0.5447	0.4553
										217.647	0.56791	0.43209		217.639	0.62691	0.37309		217.646	0.77388	0.22612		217.646	0.75509	0.24491		217.663	0.8535	0.1465		201.321	0.9594	0.0406		201.324	0.93456	0.06544		217.643	0.54006	0.45994		217.643	0.5716	0.4284		216.791	0.60061	0.39939
										217.902	0.56069	0.43931		217.896	0.62335	0.37665		217.901	0.69153	0.30847		217.901	0.74221	0.25779		217.919	0.83571	0.16429		201.557	0.94364	0.05636		201.561	0.94752	0.05248		217.899	0.53598	0.46402		217.899	0.53554	0.46446		217.047	0.60456	0.39544
										218.159	0.5395	0.4605		218.153	0.62897	0.37103		218.157	0.68918	0.31082		218.158	0.75344	0.24656		218.174	0.82613	0.17387		201.795	0.94021	0.05979		201.797	0.94722	0.05278		218.155	0.5544	0.4456		218.155	0.54316	0.45684		217.301	0.59522	0.40478
										218.415	0.55745	0.44255		218.407	0.62258	0.37742		218.414	0.68198	0.31802		218.413	0.71526	0.28474		218.431	0.83059	0.16941		202.032	0.94385	0.05615		202.034	0.94682	0.05318		218.411	0.55307	0.44693		218.411	0.54015	0.45985		217.557	0.60128	0.39872
										218.671	0.54823	0.45177		218.664	0.6214	0.3786		218.669	0.69618	0.30382		218.669	0.73816	0.26184		218.687	0.84054	0.15946		202.268	0.94772	0.05228		202.271	0.93937	0.06063		218.668	0.55762	0.44238		218.666	0.5599	0.4401		217.811	0.61709	0.38291
										218.927	0.53031	0.46969		218.92	0.61987	0.38013		218.926	0.6902	0.3098		218.926	0.74136	0.25864		218.943	0.84328	0.15672		202.505	0.94628	0.05372		202.507	0.93492	0.06508		218.924	0.53469	0.46531		218.923	0.56681	0.43319		218.067	0.68608	0.31392
										219.183	0.54906	0.45094		219.176	0.63204	0.36796		219.182	0.67501	0.32499		219.182	0.79904	0.20096		219.199	0.85413	0.14587		202.743	0.9466	0.0534		202.744	0.94118	0.05882		219.179	0.53885	0.46115		219.179	0.55403	0.44597		218.322	0.5974	0.4026
										219.439	0.56318	0.43682		219.432	0.62874	0.37126		219.437	0.68702	0.31298		219.437	0.74086	0.25914		219.455	0.85024	0.14976		202.978	0.93832	0.06168		202.981	0.94154	0.05846		219.436	0.54734	0.45266		219.435	0.53576	0.46424		218.577	0.58086	0.41914
										219.695	0.50428	0.49572		219.688	0.62598	0.37402		219.694	0.7008	0.2992		219.693	0.75348	0.24652		219.711	0.84776	0.15224		203.216	0.94543	0.05457		203.219	0.95347	0.04653		219.692	0.56368	0.43632		219.691	0.54737	0.45263		218.832	0.671	0.329
										219.951	0.54186	0.45814		219.944	0.62393	0.37607		219.949	0.65707	0.34293		219.949	0.72185	0.27815		219.967	0.83629	0.16371		203.452	0.94956	0.05044		203.456	0.95606	0.04394		219.948	0.55671	0.44329		219.947	0.54301	0.45699		219.088	0.58837	0.41163
										220.207	0.54791	0.45209		220.201	0.62303	0.37697		220.206	0.69254	0.30746		220.205	0.74804	0.25196		220.223	0.84821	0.15179		203.69	0.94365	0.05635		203.692	0.94011	0.05989		220.204	0.58815	0.41185		220.203	0.55053	0.44947		219.343	0.59532	0.40468
										220.463	0.54889	0.45111		220.457	0.62259	0.37741		220.462	0.67909	0.32091		220.462	0.73937	0.26063		220.479	0.85593	0.14407		203.926	0.93778	0.06222		203.928	0.92937	0.07063		220.46	0.60088	0.39912		220.459	0.57235	0.42765		219.597	0.57921	0.42079
										220.719	0.54983	0.45017		220.713	0.61564	0.38436		220.718	0.69486	0.30514		220.717	0.74319	0.25681		220.735	0.83735	0.16265		204.163	0.93354	0.06646		204.165	0.9354	0.0646		220.715	0.5037	0.4963		220.715	0.55262	0.44738		219.852	0.5827	0.4173
										220.976	0.54386	0.45614		220.969	0.61749	0.38251		220.974	0.68746	0.31254		220.973	0.75503	0.24497		220.991	0.84242	0.15758		204.399	0.95238	0.04762		204.403	0.9362	0.0638		220.972	0.60915	0.39085		220.971	0.54189	0.45811		220.107	0.59774	0.40226
										221.231	0.53544	0.46456		221.225	0.61887	0.38113		221.23	0.70272	0.29728		221.229	0.75176	0.24824		221.247	0.84584	0.15416		204.636	0.93781	0.06219		204.639	0.94878	0.05122		221.228	0.5395	0.4605		221.228	0.5422	0.4578		220.362	0.58335	0.41665
										221.487	0.56925	0.43075		221.48	0.62479	0.37521		221.487	0.69596	0.30404		221.485	0.74811	0.25189		221.503	0.84994	0.15006		204.875	0.95673	0.04327		204.876	0.94239	0.05761		221.484	0.56084	0.43916		221.484	0.56671	0.43329		220.618	0.59031	0.40969
										221.743	0.52738	0.47262		221.737	0.6176	0.3824		221.743	0.69665	0.30335		221.741	0.74206	0.25794		221.759	0.83542	0.16458		205.11	0.95004	0.04996		205.113	0.9527	0.0473		221.74	0.55271	0.44729		221.74	0.54586	0.45414		220.873	0.60405	0.39595
										221.999	0.55614	0.44386		221.993	0.6221	0.3779		222	0.69585	0.30415		221.997	0.75191	0.24809		222.015	0.84657	0.15343		205.347	0.93807	0.06193		205.35	0.93166	0.06834		221.997	0.55632	0.44368		221.995	0.54017	0.45983		221.128	0.59797	0.40203
										222.255	0.54405	0.45595		222.249	0.61498	0.38502		222.255	0.68032	0.31968		222.254	0.75578	0.24422		222.271	0.84201	0.15799		205.584	0.9351	0.0649		205.587	0.94885	0.05115		222.252	0.53513	0.46487		222.251	0.57759	0.42241		221.383	0.60191	0.39809
										222.512	0.55307	0.44693		222.505	0.62611	0.37389		222.512	0.6922	0.3078		222.51	0.75368	0.24632		222.527	0.83212	0.16788		205.821	0.94563	0.05437		205.824	0.93723	0.06277		222.508	0.56604	0.43396		222.507	0.53862	0.46138		221.638	0.6027	0.3973
										222.768	0.57403	0.42597		222.761	0.61998	0.38002		222.767	0.69452	0.30548		222.766	0.70883	0.29117		222.784	0.84151	0.15849		206.058	0.9518	0.0482		206.061	0.93717	0.06283		222.764	0.54113	0.45887		222.763	0.55739	0.44261		221.892	0.58464	0.41536
										223.023	0.56266	0.43734		223.017	0.62776	0.37224		223.023	0.68067	0.31933		223.022	0.74542	0.25458		223.039	0.85132	0.14868		206.294	0.92987	0.07013		206.296	0.94208	0.05792		223.021	0.53425	0.46575		223.02	0.54294	0.45706		222.148	0.58792	0.41208
										223.28	0.52235	0.47765		223.273	0.62343	0.37657		223.28	0.68846	0.31154		223.278	0.73785	0.26215		223.296	0.84374	0.15626		206.531	0.94846	0.05154		206.535	0.94849	0.05151		223.276	0.54838	0.45162		223.275	0.55095	0.44905		222.403	0.58694	0.41306
										223.536	0.53818	0.46182		223.529	0.62079	0.37921		223.536	0.68534	0.31466		223.533	0.7478	0.2522		223.551	0.84018	0.15982		206.768	0.94218	0.05782		206.771	0.94718	0.05282		223.532	0.5453	0.4547		223.531	0.51898	0.48102		222.658	0.57923	0.42077
										223.792	0.56081	0.43919		223.785	0.61927	0.38073		223.796	0.69186	0.30814		223.79	0.7499	0.2501		223.808	0.82741	0.17259		207.005	0.9586	0.0414		207.007	0.94183	0.05817		223.789	0.57492	0.42508		223.788	0.53842	0.46158		222.913	0.6053	0.3947
										224.047	0.54024	0.45976		224.042	0.61534	0.38466		224.052	0.69955	0.30045		224.046	0.73768	0.26232		224.064	0.84728	0.15272		207.242	0.92574	0.07426		207.244	0.92378	0.07622		224.045	0.55113	0.44887		224.044	0.5343	0.4657		223.168	0.58681	0.41319
										224.304	0.55248	0.44752		224.297	0.62123	0.37877		224.308	0.68692	0.31308		224.302	0.74566	0.25434		224.32	0.83213	0.16787		207.48	0.95294	0.04706		207.481	0.94186	0.05814		224.3	0.54787	0.45213		224.299	0.53551	0.46449		223.423	0.57781	0.42219
										224.56	0.55052	0.44948		224.553	0.62454	0.37546		224.564	0.69209	0.30791		224.558	0.74472	0.25528		224.576	0.84222	0.15778		207.716	0.94516	0.05484		207.719	0.94745	0.05255		224.557	0.54342	0.45658		224.556	0.52134	0.47866		223.678	0.58689	0.41311
										224.816	0.55678	0.44322		224.809	0.62302	0.37698		224.82	0.67258	0.32742		224.814	0.74782	0.25218		224.832	0.83885	0.16115		207.953	0.92984	0.07016		207.954	0.93577	0.06423		224.812	0.55435	0.44565		224.812	0.53834	0.46166		223.933	0.59271	0.40729
										225.072	0.54894	0.45106		225.066	0.62203	0.37797		225.076	0.6891	0.3109		225.07	0.74921	0.25079		225.088	0.84361	0.15639		208.19	0.95012	0.04988		208.192	0.95622	0.04378		225.068	0.55774	0.44226		225.068	0.55789	0.44211		224.188	0.59212	0.40788
										225.328	0.54098	0.45902		225.321	0.6268	0.3732		225.333	0.69057	0.30943		225.326	0.74037	0.25963		225.344	0.84272	0.15728		208.426	0.95528	0.04472		208.428	0.93978	0.06022		225.324	0.56674	0.43326		225.324	0.52844	0.47156		224.443	0.58689	0.41311
										225.585	0.56074	0.43926		225.577	0.62275	0.37725		225.589	0.71808	0.28192		225.583	0.71988	0.28012		225.6	0.83852	0.16148		208.663	0.95216	0.04784		208.665	0.9443	0.0557		225.581	0.53733	0.46267		225.579	0.52684	0.47316		224.698	0.60298	0.39702
										225.841	0.56149	0.43851		225.833	0.61952	0.38048		225.845	0.73361	0.26639		225.839	0.74939	0.25061		225.855	0.84241	0.15759		208.899	0.93929	0.06071		208.903	0.93868	0.06132		225.837	0.54958	0.45042		225.836	0.54149	0.45851		224.953	0.59573	0.40427
										226.096	0.53767	0.46233		226.089	0.61694	0.38306		226.1	0.71991	0.28009		226.095	0.75312	0.24688		226.112	0.84843	0.15157		209.136	0.94637	0.05363		209.138	0.94543	0.05457		226.093	0.54789	0.45211		226.092	0.55538	0.44462		225.208	0.58434	0.41566
										226.353	0.55686	0.44314		226.346	0.62583	0.37417		226.356	0.71793	0.28207		226.351	0.73854	0.26146		226.367	0.83608	0.16392		209.374	0.9371	0.0629		209.376	0.95732	0.04268		226.348	0.55598	0.44402		226.348	0.56034	0.43966		225.463	0.5972	0.4028
										226.608	0.52678	0.47322		226.601	0.61935	0.38065		226.612	0.71445	0.28555		226.606	0.74383	0.25617		226.624	0.84282	0.15718		209.611	0.94977	0.05023		209.613	0.93398	0.06602		226.605	0.53108	0.46892		226.604	0.57275	0.42725		225.718	0.58784	0.41216
										226.865	0.5565	0.4435		226.857	0.61551	0.38449		226.868	0.69535	0.30465		226.863	0.74277	0.25723		226.881	0.83866	0.16134		209.847	0.94494	0.05506		209.849	0.94222	0.05778		226.861	0.57114	0.42886		226.861	0.55123	0.44877		225.973	0.58955	0.41045
										227.12	0.5648	0.4352		227.113	0.62189	0.37811		227.124	0.70175	0.29825		227.118	0.74964	0.25036		227.136	0.84628	0.15372		210.083	0.93248	0.06752		210.087	0.94457	0.05543		227.117	0.55135	0.44865		227.117	0.55788	0.44212		226.228	0.58655	0.41345
										227.376	0.57336	0.42664		227.37	0.62416	0.37584		227.38	0.69083	0.30917		227.374	0.73921	0.26079		227.393	0.84467	0.15533		210.321	0.93981	0.06019		210.323	0.93421	0.06579		227.374	0.53982	0.46018		227.373	0.56109	0.43891		226.484	0.58303	0.41697
										227.633	0.55379	0.44621		227.626	0.61778	0.38222		227.636	0.7032	0.2968		227.631	0.73858	0.26142		227.648	0.8401	0.1599		210.558	0.94405	0.05595		210.561	0.94891	0.05109		227.63	0.57463	0.42537		227.629	0.52564	0.47436		226.738	0.57824	0.42176
										227.888	0.56469	0.43531		227.882	0.61059	0.38941		227.892	0.69845	0.30155		227.886	0.74612	0.25388		227.904	0.84319	0.15681		210.796	0.94346	0.05654		210.797	0.94603	0.05397		227.886	0.54582	0.45418		227.884	0.54078	0.45922		226.993	0.48801	0.51199
										228.145	0.58056	0.41944		228.137	0.6204	0.3796		228.149	0.72257	0.27743		228.143	0.73401	0.26599		228.16	0.84343	0.15657		211.031	0.94817	0.05183		211.035	0.95322	0.04678		228.141	0.45979	0.54021		228.14	0.55485	0.44515		227.248	0.59742	0.40258
										228.401	0.54248	0.45752		228.394	0.60764	0.39236		228.405	0.70691	0.29309		228.399	0.74088	0.25912		228.416	0.84569	0.15431		211.267	0.94492	0.05508		211.271	0.95673	0.04327		228.397	0.53533	0.46467		228.397	0.53564	0.46436		227.503	0.62706	0.37294
										228.657	0.5586	0.4414		228.65	0.61887	0.38113		228.66	0.72351	0.27649		228.655	0.72299	0.27701		228.673	0.83476	0.16524		211.505	0.94492	0.05508		211.508	0.95075	0.04925		228.654	0.54063	0.45937		228.653	0.55527	0.44473		227.759	0.61309	0.38691
										228.913	0.57034	0.42966		228.906	0.62092	0.37908		228.917	0.76326	0.23674		228.911	0.74772	0.25228		228.928	0.84389	0.15611		211.742	0.94262	0.05738		211.744	0.95525	0.04475		228.91	0.55307	0.44693		228.909	0.56452	0.43548		228.014	0.59046	0.40954
										229.169	0.56569	0.43431		229.162	0.61339	0.38661		229.172	0.71642	0.28358		229.167	0.71632	0.28368		229.185	0.82927	0.17073		211.98	0.94596	0.05404		211.981	0.93949	0.06051		229.166	0.53513	0.46487		229.164	0.52568	0.47432		228.269	0.59106	0.40894
										229.425	0.58623	0.41377		229.418	0.61063	0.38937		229.429	0.74466	0.25534		229.423	0.73545	0.26455		229.441	0.8462	0.1538		212.216	0.94209	0.05791		212.218	0.94532	0.05468		229.421	0.54099	0.45901		229.421	0.55443	0.44557		228.524	0.59	0.41
										229.681	0.52822	0.47178		229.674	0.60926	0.39074		229.685	0.71824	0.28176		229.679	0.73658	0.26342		229.697	0.84158	0.15842		212.453	0.93916	0.06084		212.454	0.93442	0.06558		229.678	0.66482	0.33518		229.677	0.55629	0.44371		228.779	0.59997	0.40003
										229.936	0.52594	0.47406		229.93	0.62326	0.37674		229.94	0.71427	0.28573		229.935	0.73682	0.26318		229.953	0.83978	0.16022		212.69	0.93748	0.06252		212.691	0.9371	0.0629		229.934	0.55766	0.44234		229.933	0.56781	0.43219		229.034	0.59131	0.40869
										230.193	0.55001	0.44999		230.186	0.61268	0.38732		230.196	0.70886	0.29114		230.191	0.72403	0.27597		230.209	0.84258	0.15742		212.927	0.94569	0.05431		212.928	0.94658	0.05342		230.189	0.54338	0.45662		230.19	0.56009	0.43991		229.289	0.59272	0.40728
										230.449	0.5174	0.4826		230.443	0.61443	0.38557		230.453	0.70459	0.29541		230.447	0.73679	0.26321		230.465	0.84308	0.15692		213.163	0.94438	0.05562		213.166	0.95031	0.04969		230.445	0.59987	0.40013		230.445	0.55861	0.44139		229.544	0.57737	0.42263
										230.706	0.55088	0.44912		230.698	0.61526	0.38474		230.708	0.69853	0.30147		230.704	0.74755	0.25245		230.721	0.84429	0.15571		213.399	0.95108	0.04892		213.403	0.95077	0.04923		230.701	0.50472	0.49528		230.7	0.54795	0.45205		229.799	0.58028	0.41972
										230.962	0.55539	0.44461		230.954	0.61564	0.38436		230.964	0.68204	0.31796		230.959	0.72508	0.27492		230.977	0.83359	0.16641		213.637	0.94907	0.05093		213.639	0.95629	0.04371		230.958	0.52417	0.47583		230.957	0.56079	0.43921		230.054	0.58707	0.41293
										231.217	0.54293	0.45707		231.21	0.6128	0.3872		231.221	0.69026	0.30974		231.215	0.74367	0.25633		231.233	0.83292	0.16708		213.873	0.93757	0.06243		213.876	0.93651	0.06349		231.213	0.52479	0.47521		231.213	0.54967	0.45033		230.308	0.58943	0.41057
										231.473	0.54598	0.45402		231.466	0.6178	0.3822		231.477	0.68916	0.31084		231.471	0.75267	0.24733		231.489	0.83899	0.16101		214.11	0.94194	0.05806		214.112	0.95801	0.04199		231.47	0.53501	0.46499		231.47	0.54929	0.45071		230.564	0.59894	0.40106
										231.73	0.52088	0.47912		231.722	0.61383	0.38617		231.733	0.6816	0.3184		231.727	0.68127	0.31873		231.745	0.81553	0.18447		214.347	0.93205	0.06795		214.35	0.93105	0.06895		231.726	0.39751	0.60249		231.725	0.54632	0.45368		230.819	0.58977	0.41023
										231.985	0.5375	0.4625		231.979	0.61202	0.38798		231.989	0.68714	0.31286		231.983	0.71861	0.28139		232.001	0.83889	0.16111		214.584	0.93513	0.06487		214.587	0.9359	0.0641		231.981	0.54334	0.45666		231.981	0.54826	0.45174		231.075	0.58526	0.41474
										232.242	0.54449	0.45551		232.235	0.61496	0.38504		232.245	0.6944	0.3056		232.24	0.74026	0.25974		232.257	0.83816	0.16184		214.821	0.96286	0.03714		214.823	0.9367	0.0633		232.239	0.5333	0.4667		232.237	0.54036	0.45964		231.329	0.58782	0.41218
										232.497	0.54378	0.45622		232.49	0.60205	0.39795		232.502	0.6775	0.3225		232.495	0.73598	0.26402		232.513	0.83302	0.16698		215.058	0.94691	0.05309		215.06	0.95223	0.04777		232.495	0.56332	0.43668		232.494	0.52484	0.47516		231.584	0.58213	0.41787
										232.754	0.559	0.441		232.746	0.60453	0.39547		232.757	0.6746	0.3254		232.751	0.73004	0.26996		232.769	0.84123	0.15877		215.295	0.93881	0.06119		215.296	0.93521	0.06479		232.752	0.54763	0.45237		232.749	0.53373	0.46627		231.84	0.573	0.427
										233.01	0.52352	0.47648		233.003	0.61096	0.38904		233.013	0.67176	0.32824		233.008	0.75584	0.24416		233.025	0.819	0.181		215.533	0.92219	0.07781		215.534	0.94436	0.05564		233.007	0.55112	0.44888		233.005	0.56093	0.43907		232.095	0.60087	0.39913
										233.266	0.53521	0.46479		233.259	0.60731	0.39269		233.269	0.68168	0.31832		233.264	0.73949	0.26051		233.282	0.83857	0.16143		215.769	0.93969	0.06031		215.771	0.94657	0.05343		233.264	0.53131	0.46869		233.261	0.54302	0.45698		232.349	0.59034	0.40966
										233.522	0.57189	0.42811		233.515	0.60871	0.39129		233.525	0.67743	0.32257		233.519	0.69747	0.30253		233.537	0.84412	0.15588		216.005	0.93829	0.06171		216.007	0.92778	0.07222		233.519	0.53956	0.46044		233.517	0.33076	0.66924		232.604	0.57989	0.42011
										233.777	0.52636	0.47364		233.771	0.61112	0.38888		233.782	0.68525	0.31475		233.776	0.71941	0.28059		233.794	0.83735	0.16265		216.242	0.94126	0.05874		216.244	0.95714	0.04286		233.775	0.77961	0.22039		233.774	0.5329	0.4671		232.86	0.58664	0.41336
										234.034	0.5763	0.4237		234.027	0.61655	0.38345		234.039	0.67091	0.32909		234.033	0.73577	0.26423		234.049	0.84788	0.15212		216.48	0.95105	0.04895		216.48	0.94959	0.05041		234.032	0.54014	0.45986		234.03	0.54983	0.45017		233.114	0.58249	0.41751
										234.29	0.55642	0.44358		234.284	0.61227	0.38773		234.293	0.67835	0.32165		234.288	0.74733	0.25267		234.306	0.83567	0.16433		216.716	0.94491	0.05509		216.718	0.95647	0.04353		234.288	0.53332	0.46668		234.285	0.58323	0.41677		233.369	0.58741	0.41259
										234.546	0.54118	0.45882		234.54	0.61479	0.38521		234.55	0.66935	0.33065		234.544	0.75385	0.24615		234.562	0.83665	0.16335		216.953	0.93803	0.06197		216.954	0.94684	0.05316		234.544	0.54776	0.45224		234.541	0.51878	0.48122		233.626	0.57538	0.42462
										234.802	0.53555	0.46445		234.796	0.61719	0.38281		234.805	0.69335	0.30665		234.8	0.73799	0.26201		234.818	0.83381	0.16619		217.189	0.93376	0.06624		217.191	0.92847	0.07153		234.799	0.53841	0.46159		234.797	0.53936	0.46064		233.879	0.57275	0.42725
										235.058	0.55763	0.44237		235.051	0.61132	0.38868		235.062	0.6787	0.3213		235.056	0.74438	0.25562		235.074	0.84437	0.15563		217.426	0.93842	0.06158		217.428	0.93237	0.06763		235.055	0.53649	0.46351		235.054	0.57816	0.42184		234.135	0.58659	0.41341
										235.313	0.55538	0.44462		235.307	0.61578	0.38422		235.318	0.679	0.321		235.313	0.73441	0.26559		235.33	0.83894	0.16106		217.663	0.95006	0.04994		217.665	0.94662	0.05338		235.312	0.54273	0.45727		235.31	0.54098	0.45902		234.391	0.58545	0.41455
										235.57	0.55905	0.44095		235.564	0.61375	0.38625		235.574	0.67416	0.32584		235.569	0.73016	0.26984		235.586	0.83952	0.16048		217.9	0.94269	0.05731		217.903	0.9453	0.0547		235.568	0.52433	0.47567		235.566	0.54364	0.45636		234.646	0.57924	0.42076
										235.826	0.55206	0.44794		235.82	0.61634	0.38366		235.831	0.68462	0.31538		235.825	0.76134	0.23866		235.842	0.83287	0.16713		218.137	0.93592	0.06408		218.139	0.94352	0.05648		235.824	0.6817	0.3183		235.822	0.55207	0.44793		234.9	0.58766	0.41234
										236.082	0.54732	0.45268		236.076	0.61437	0.38563		236.085	0.6807	0.3193		236.08	0.73278	0.26722		236.098	0.8305	0.1695		218.373	0.93277	0.06723		218.375	0.94447	0.05553		236.08	0.54859	0.45141		236.079	0.5409	0.4591		235.155	0.56917	0.43083
										236.339	0.53489	0.46511		236.331	0.61319	0.38681		236.342	0.67759	0.32241		236.337	0.73035	0.26965		236.354	0.83345	0.16655		218.611	0.92399	0.07601		218.613	0.95004	0.04996		236.336	0.52803	0.47197		236.334	0.58051	0.41949		235.41	0.57251	0.42749
										236.594	0.54435	0.45565		236.588	0.60969	0.39031		236.599	0.68319	0.31681		236.593	0.71057	0.28943		236.61	0.82436	0.17564		218.847	0.93996	0.06004		218.85	0.94021	0.05979		236.591	0.5539	0.4461		236.59	0.5235	0.4765		235.665	0.57909	0.42091
										236.851	0.52858	0.47142		236.843	0.61772	0.38228		236.854	0.6775	0.3225		236.848	0.73649	0.26351		236.866	0.81861	0.18139		219.084	0.94255	0.05745		219.087	0.92168	0.07832		236.849	0.71723	0.28277		236.846	0.53738	0.46262		235.92	0.58129	0.41871
										237.106	0.54597	0.45403		237.1	0.60762	0.39238		237.11	0.62818	0.37182		237.105	0.74244	0.25756		237.122	0.83529	0.16471		219.321	0.93887	0.06113		219.324	0.93882	0.06118		237.104	0.53719	0.46281		237.103	0.56041	0.43959		236.175	0.58368	0.41632
										237.363	0.55827	0.44173		237.356	0.61881	0.38119		237.366	0.68175	0.31825		237.36	0.72611	0.27389		237.379	0.84159	0.15841		219.558	0.94972	0.05028		219.561	0.94922	0.05078		237.36	0.54124	0.45876		237.358	0.5478	0.4522		236.431	0.69306	0.30694
										237.619	0.52603	0.47397		237.613	0.60352	0.39648		237.623	0.67954	0.32046		237.617	0.73256	0.26744		237.634	0.83895	0.16105		219.795	0.95132	0.04868		219.796	0.94644	0.05356		237.616	0.53222	0.46778		237.614	0.54888	0.45112		236.686	0.59977	0.40023
										237.875	0.53611	0.46389		237.868	0.60861	0.39139		237.879	0.68874	0.31126		237.872	0.73183	0.26817		237.89	0.83292	0.16708		220.031	0.93016	0.06984		220.034	0.94201	0.05799		237.873	0.53464	0.46536		237.87	0.5386	0.4614		236.94	0.61396	0.38604
										238.131	0.53311	0.46689		238.124	0.61514	0.38486		238.135	0.68568	0.31432		238.128	0.7226	0.2774		238.146	0.8347	0.1653		220.269	0.93602	0.06398		220.27	0.92953	0.07047		238.129	0.52459	0.47541		238.126	0.554	0.446		237.195	0.57385	0.42615
										238.386	0.55927	0.44073		238.38	0.60608	0.39392		238.392	0.68623	0.31377		238.385	0.73395	0.26605		238.403	0.82468	0.17532		220.504	0.92998	0.07002		220.508	0.93075	0.06925		238.384	0.53356	0.46644		238.383	0.5297	0.4703		237.45	0.57886	0.42114
										238.643	0.54935	0.45065		238.636	0.60911	0.39089		238.648	0.67015	0.32985		238.64	0.73103	0.26897		238.659	0.83704	0.16296		220.741	0.93692	0.06308		220.744	0.94411	0.05589		238.641	0.56432	0.43568		238.639	0.55609	0.44391		237.706	0.57977	0.42023
										238.898	0.55299	0.44701		238.893	0.60183	0.39817		238.904	0.68071	0.31929		238.897	0.71708	0.28292		238.914	0.82179	0.17821		220.979	0.94693	0.05307		220.98	0.9347	0.0653		238.897	0.53672	0.46328		238.894	0.56759	0.43241		237.96	0.59591	0.40409
										239.154	0.54709	0.45291		239.148	0.60704	0.39296		239.16	0.68464	0.31536		239.152	0.74216	0.25784		239.171	0.83586	0.16414		221.216	0.9264	0.0736		221.217	0.93466	0.06534		239.153	0.52091	0.47909		239.151	0.57551	0.42449		238.216	0.59822	0.40178
										239.41	0.52677	0.47323		239.405	0.60656	0.39344		239.416	0.68119	0.31881		239.408	0.72873	0.27127		239.427	0.83557	0.16443		221.453	0.95285	0.04715		221.456	0.93603	0.06397		239.408	0.50132	0.49868		239.406	0.53993	0.46007		238.471	0.58326	0.41674
										239.667	0.56344	0.43656		239.661	0.61039	0.38961		239.673	0.67591	0.32409		239.664	0.73555	0.26445		239.682	0.82417	0.17583		221.69	0.94704	0.05296		221.692	0.93273	0.06727		239.665	0.54077	0.45923		239.663	0.54224	0.45776		238.726	0.6007	0.3993
										239.922	0.58198	0.41802		239.917	0.60424	0.39576		239.928	0.67401	0.32599		239.922	0.72876	0.27124		239.939	0.82411	0.17589		221.926	0.93365	0.06635		221.929	0.94414	0.05586		239.92	0.53122	0.46878		239.919	0.51341	0.48659		238.981	0.58047	0.41953
										240.178	0.5002	0.4998		240.173	0.61176	0.38824		240.183	0.6767	0.3233		240.177	0.74281	0.25719		240.195	0.82667	0.17333		222.163	0.94072	0.05928		222.165	0.95001	0.04999		240.177	0.64301	0.35699		240.175	0.5661	0.4339		239.236	0.58953	0.41047
										240.435	0.53649	0.46351		240.429	0.60486	0.39514		240.44	0.67539	0.32461		240.433	0.74017	0.25983		240.451	0.83272	0.16728		222.399	0.944	0.056		222.403	0.93262	0.06738		240.432	0.53155	0.46845		240.431	0.53088	0.46912		239.491	0.5791	0.4209
										240.691	0.52666	0.47334		240.685	0.61038	0.38962		240.696	0.67832	0.32168		240.689	0.70127	0.29873		240.707	0.81673	0.18327		222.637	0.93636	0.06364		222.64	0.94795	0.05205		240.688	0.54045	0.45955		240.687	0.50885	0.49115		239.746	0.57337	0.42663
										240.947	0.52278	0.47722		240.942	0.60831	0.39169		240.952	0.68225	0.31775		240.945	0.73352	0.26648		240.962	0.82266	0.17734		222.874	0.93914	0.06086		222.876	0.91836	0.08164		240.945	0.53972	0.46028		240.942	0.54008	0.45992		240.002	0.57786	0.42214
										241.203	0.52996	0.47004		241.197	0.6105	0.3895		241.208	0.66943	0.33057		241.202	0.71827	0.28173		241.218	0.81881	0.18119		223.11	0.94915	0.05085		223.113	0.94155	0.05845		241.2	0.5482	0.4518		241.199	0.53209	0.46791		240.257	0.58758	0.41242
										241.459	0.51323	0.48677		241.453	0.60654	0.39346		241.464	0.67344	0.32656		241.457	0.67339	0.32661		241.475	0.81771	0.18229		223.347	0.94267	0.05733		223.349	0.94249	0.05751		241.458	0.55947	0.44053		241.455	0.52506	0.47494		240.51	0.57505	0.42495
										241.715	0.53397	0.46603		241.71	0.60816	0.39184		241.719	0.67236	0.32764		241.714	0.74042	0.25958		241.731	0.81798	0.18202		223.584	0.94294	0.05706		223.586	0.94982	0.05018		241.713	0.54053	0.45947		241.711	0.53243	0.46757		240.766	0.58104	0.41896
										241.971	0.50685	0.49315		241.966	0.60422	0.39578		241.977	0.6719	0.3281		241.97	0.73749	0.26251		241.986	0.83498	0.16502		223.821	0.93518	0.06482		223.823	0.94127	0.05873		241.969	0.52538	0.47462		241.967	0.54183	0.45817		241.021	0.57984	0.42016
										242.228	0.55751	0.44249		242.221	0.61021	0.38979		242.232	0.65348	0.34652		242.226	0.76327	0.23673		242.243	0.83245	0.16755		224.057	0.94752	0.05248		224.06	0.94538	0.05462		242.225	0.50283	0.49717		242.223	0.5448	0.4552		241.276	0.61967	0.38033
										242.484	0.53019	0.46981		242.477	0.6112	0.3888		242.489	0.66804	0.33196		242.481	0.69455	0.30545		242.5	0.81887	0.18113		224.294	0.93292	0.06708		224.297	0.93186	0.06814		242.482	0.54413	0.45587		242.48	0.54203	0.45797		241.531	0.5938	0.4062
										242.74	0.52555	0.47445		242.734	0.60763	0.39237		242.744	0.67977	0.32023		242.738	0.66441	0.33559		242.756	0.82529	0.17471		224.532	0.94098	0.05902		224.533	0.93089	0.06911		242.736	0.52103	0.47897		242.735	0.52217	0.47783		241.786	0.58556	0.41444
										242.996	0.53983	0.46017		242.99	0.60875	0.39125		243	0.675	0.325		242.994	0.76794	0.23206		243.011	0.82704	0.17296		224.769	0.93903	0.06097		224.77	0.94031	0.05969		242.994	0.53397	0.46603		242.992	0.51969	0.48031		242.041	0.57663	0.42337
										243.252	0.53207	0.46793		243.246	0.60786	0.39214		243.257	0.67173	0.32827		243.25	0.76014	0.23986		243.268	0.82934	0.17066		225.006	0.94985	0.05015		225.008	0.9316	0.0684		243.25	0.52447	0.47553		243.248	0.52651	0.47349		242.297	0.58231	0.41769
										243.508	0.54778	0.45222		243.502	0.61125	0.38875		243.513	0.67966	0.32034		243.506	0.72935	0.27065		243.524	0.83464	0.16536		225.243	0.93219	0.06781		225.244	0.93285	0.06715		243.505	0.52599	0.47401		243.504	0.53921	0.46079		242.551	0.56805	0.43195
										243.764	0.54593	0.45407		243.758	0.59136	0.40864		243.768	0.64589	0.35411		243.761	0.64013	0.35987		243.78	0.81624	0.18376		225.479	0.95109	0.04891		225.481	0.93066	0.06934		243.761	0.55248	0.44752		243.759	0.5378	0.4622		242.806	0.57232	0.42768
										244.021	0.55908	0.44092		244.014	0.60541	0.39459		244.025	0.67281	0.32719		244.018	0.72593	0.27407		244.035	0.8301	0.1699		225.715	0.94265	0.05735		225.718	0.93072	0.06928		244.018	0.54592	0.45408		244.015	0.56238	0.43762		243.062	0.57301	0.42699
										244.277	0.51682	0.48318		244.27	0.60227	0.39773		244.281	0.65622	0.34378		244.274	0.75254	0.24746		244.291	0.83038	0.16962		225.953	0.95906	0.04094		225.955	0.93326	0.06674		244.274	0.54893	0.45107		244.272	0.51682	0.48318		243.316	0.56428	0.43572
										244.532	0.51905	0.48095		244.525	0.59273	0.40727		244.537	0.68045	0.31955		244.53	0.7749	0.2251		244.548	0.81665	0.18335		226.189	0.93613	0.06387		226.192	0.94697	0.05303		244.529	0.52974	0.47026		244.528	0.73908	0.26092		243.572	0.54153	0.45847
										244.788	0.55571	0.44429		244.783	0.60164	0.39836		244.792	0.66187	0.33813		244.786	0.71427	0.28573		244.804	0.82557	0.17443		226.426	0.94674	0.05326		226.429	0.9473	0.0527		244.785	0.52659	0.47341		244.784	0.55631	0.44369		243.826	0.5725	0.4275
										245.045	0.54059	0.45941		245.038	0.6026	0.3974		245.049	0.68035	0.31965		245.042	0.73043	0.26957		245.06	0.82247	0.17753		226.663	0.92593	0.07407		226.664	0.92312	0.07688		245.041	0.52956	0.47044		245.04	0.5254	0.4746		244.082	0.5949	0.4051
										245.3	0.54156	0.45844		245.294	0.60768	0.39232		245.304	0.67238	0.32762		245.298	0.71045	0.28955		245.316	0.81997	0.18003		226.9	0.94444	0.05556		226.902	0.92551	0.07449		245.298	0.46938	0.53062		245.295	0.54963	0.45037		244.337	0.56942	0.43058
										245.557	0.54608	0.45392		245.55	0.60486	0.39514		245.561	0.68073	0.31927		245.553	0.71088	0.28912		245.572	0.82601	0.17399		227.136	0.94327	0.05673		227.139	0.93825	0.06175		245.554	0.53932	0.46068		245.552	0.51949	0.48051		244.592	0.57311	0.42689
										245.813	0.52936	0.47064		245.806	0.60411	0.39589		245.816	0.67972	0.32028		245.811	0.73405	0.26595		245.828	0.83056	0.16944		227.374	0.93326	0.06674		227.376	0.94169	0.05831		245.81	0.54436	0.45564		245.808	0.53102	0.46898		244.847	0.57632	0.42368
										246.07	0.52253	0.47747		246.062	0.599	0.401		246.073	0.6747	0.3253		246.066	0.63011	0.36989		246.084	0.82566	0.17434		227.61	0.93761	0.06239		227.613	0.9277	0.0723		246.066	0.52941	0.47059		246.064	0.55006	0.44994		245.101	0.58062	0.41938
										246.324	0.51326	0.48674		246.319	0.59998	0.40002		246.329	0.66525	0.33475		246.323	0.63691	0.36309		246.339	0.83182	0.16818		227.847	0.94122	0.05878		227.85	0.9376	0.0624		246.321	0.51785	0.48215		246.32	0.53907	0.46093		245.356	0.57681	0.42319
										246.582	0.54285	0.45715		246.574	0.60106	0.39894		246.585	0.63963	0.36037		246.579	0.72671	0.27329		246.597	0.82397	0.17603		228.084	0.93776	0.06224		228.086	0.93568	0.06432		246.578	0.53998	0.46002		246.576	0.52116	0.47884		245.612	0.56464	0.43536
										246.837	0.54828	0.45172		246.83	0.61113	0.38887		246.841	0.67312	0.32688		246.835	0.72542	0.27458		246.852	0.83007	0.16993		228.322	0.95266	0.04734		228.324	0.94736	0.05264		246.834	0.55117	0.44883		246.832	0.52086	0.47914		245.867	0.57995	0.42005
										247.093	0.49601	0.50399		247.086	0.60938	0.39062		247.098	0.66087	0.33913		247.091	0.67949	0.32051		247.108	0.80728	0.19272		228.558	0.93572	0.06428		228.56	0.93317	0.06683		247.091	0.5845	0.4155		247.088	0.53035	0.46965		246.122	0.57994	0.42006
										247.349	0.53957	0.46043		247.342	0.61007	0.38993		247.354	0.68182	0.31818		247.346	0.70363	0.29637		247.364	0.82481	0.17519		228.794	0.94615	0.05385		228.797	0.93934	0.06066		247.346	0.45051	0.54949		247.345	0.52814	0.47186		246.377	0.58536	0.41464
										247.606	0.5281	0.4719		247.598	0.59985	0.40015		247.61	0.85314	0.14686		247.602	0.74649	0.25351		247.62	0.81644	0.18356		229.031	0.93738	0.06262		229.033	0.95184	0.04816		247.602	0.54153	0.45847		247.6	0.50692	0.49308		246.632	0.56991	0.43009
										247.861	0.5283	0.4717		247.854	0.60103	0.39897		247.867	0.66248	0.33752		247.858	0.71461	0.28539		247.876	0.82618	0.17382		229.268	0.94619	0.05381		229.27	0.94478	0.05522		247.858	0.577	0.423		247.856	0.53925	0.46075		246.887	0.56761	0.43239
										248.118	0.51563	0.48437		248.11	0.59633	0.40367		248.122	0.6682	0.3318		248.115	0.73297	0.26703		248.132	0.83556	0.16444		229.506	0.94557	0.05443		229.507	0.93705	0.06295		248.114	0.62449	0.37551		248.113	0.53597	0.46403		247.142	0.58088	0.41912
										248.374	0.52954	0.47046		248.367	0.60454	0.39546		248.379	0.66641	0.33359		248.371	0.72208	0.27792		248.388	0.8339	0.1661		229.742	0.92566	0.07434		229.744	0.94262	0.05738		248.37	0.41068	0.58932		248.368	0.5485	0.4515		247.397	0.58732	0.41268
										248.629	0.53638	0.46362		248.623	0.59976	0.40024		248.635	0.6648	0.3352		248.626	0.73283	0.26717		248.644	0.82977	0.17023		229.979	0.93279	0.06721		229.981	0.95209	0.04791		248.626	0.54014	0.45986		248.625	0.5324	0.4676		247.652	0.57905	0.42095
										248.886	0.55953	0.44047		248.879	0.60071	0.39929		248.89	0.68052	0.31948		248.882	0.78103	0.21897		248.9	0.81963	0.18037		230.216	0.93279	0.06721		230.217	0.93669	0.06331		248.882	0.53464	0.46536		248.88	0.55343	0.44657		247.907	0.57765	0.42235
										249.142	0.54499	0.45501		249.135	0.58778	0.41222		249.147	0.67635	0.32365		249.138	0.72448	0.27552		249.156	0.8262	0.1738		230.453	0.93917	0.06083		230.455	0.93563	0.06437		249.138	0.53698	0.46302		249.137	0.52671	0.47329		248.163	0.5703	0.4297
										249.398	0.54639	0.45361		249.391	0.59839	0.40161		249.403	0.67798	0.32202		249.395	0.65262	0.34738		249.412	0.81723	0.18277		230.69	0.93554	0.06446		230.691	0.93456	0.06544		249.394	0.51905	0.48095		249.393	0.57353	0.42647		248.417	0.57818	0.42182
										249.653	0.55409	0.44591		249.646	0.59506	0.40494		249.659	0.67172	0.32828		249.651	0.71861	0.28139		249.668	0.81929	0.18071		230.926	0.93488	0.06512		230.928	0.95139	0.04861		249.651	0.55669	0.44331		249.649	0.52135	0.47865		248.672	0.57999	0.42001
										249.91	0.53388	0.46612		249.903	0.60322	0.39678		249.914	0.65239	0.34761		249.907	0.7275	0.2725		249.924	0.82028	0.17972		231.164	0.93173	0.06827		231.164	0.94312	0.05688		249.906	0.3355	0.6645		249.904	0.54132	0.45868		248.928	0.57424	0.42576
										250.166	0.54174	0.45826		250.159	0.60695	0.39305		250.17	0.66188	0.33812		250.163	0.72326	0.27674		250.181	0.82759	0.17241		231.4	0.94418	0.05582		231.401	0.93801	0.06199		250.162	0.53383	0.46617		250.161	0.5272	0.4728		249.183	0.5788	0.4212
										250.422	0.52139	0.47861		250.415	0.60345	0.39655		250.426	0.66377	0.33623		250.418	0.72974	0.27026		250.436	0.82624	0.17376		231.637	0.93637	0.06363		231.639	0.93128	0.06872		250.418	0.51826	0.48174		250.417	0.56137	0.43863		249.438	0.58247	0.41753
										250.678	0.54136	0.45864		250.671	0.60403	0.39597		250.683	0.66871	0.33129		250.675	0.7281	0.2719		250.692	0.81406	0.18594		231.874	0.94422	0.05578		231.875	0.9492	0.0508		250.674	0.41404	0.58596		250.673	0.54468	0.45532		249.693	0.58544	0.41456
										250.934	0.5454	0.4546		250.927	0.59961	0.40039		250.939	0.66855	0.33145		250.932	0.68066	0.31934		250.949	0.82641	0.17359		232.111	0.93917	0.06083		232.113	0.94609	0.05391		250.931	0.67872	0.32128		250.929	0.54071	0.45929		249.948	0.57696	0.42304
										251.19	0.50234	0.49766		251.184	0.60073	0.39927		251.195	0.67549	0.32451		251.187	0.71204	0.28796		251.205	0.82101	0.17899		232.347	0.93259	0.06741		232.349	0.93548	0.06452		251.186	0.51076	0.48924		251.185	0.53294	0.46706		250.202	0.58973	0.41027
										251.445	0.56546	0.43454		251.44	0.60316	0.39684		251.451	0.62117	0.37883		251.444	0.73473	0.26527		251.461	0.83358	0.16642		232.584	0.93223	0.06777		232.586	0.93349	0.06651		251.442	0.58138	0.41862		251.44	0.52149	0.47851		250.458	0.56595	0.43405
										251.702	0.5299	0.4701		251.695	0.60288	0.39712		251.707	0.89676	0.10324		251.699	0.73033	0.26967		251.716	0.82343	0.17657		232.821	0.93266	0.06734		232.823	0.94845	0.05155		251.699	0.5224	0.4776		251.697	0.51604	0.48396		250.713	0.57189	0.42811
										251.958	0.5398	0.4602		251.951	0.59628	0.40372		251.962	0.66855	0.33145		251.955	0.72569	0.27431		251.973	0.81946	0.18054		233.058	0.93796	0.06204		233.06	0.94302	0.05698		251.955	0.52085	0.47915		251.954	0.52101	0.47899		250.968	0.56969	0.43031
										252.215	0.52208	0.47792		252.208	0.59639	0.40361		252.218	0.67189	0.32811		252.211	0.74142	0.25858		252.229	0.81571	0.18429		233.295	0.9408	0.0592		233.296	0.93195	0.06805		252.21	0.68186	0.31814		252.208	0.53864	0.46136		251.223	0.57067	0.42933
										252.47	0.52016	0.47984		252.464	0.60138	0.39862		252.475	0.66562	0.33438		252.468	0.73108	0.26892		252.485	0.81885	0.18115		233.533	0.94111	0.05889		233.534	0.93608	0.06392		252.467	0.52979	0.47021		252.465	0.56191	0.43809		251.478	0.57433	0.42567
										252.726	0.55305	0.44695		252.719	0.59228	0.40772		252.73	0.65222	0.34778		252.724	0.73219	0.26781		252.742	0.8087	0.1913		233.769	0.93368	0.06632		233.77	0.91682	0.08318		252.722	0.55112	0.44888		252.721	0.51003	0.48997		251.733	0.57218	0.42782
										252.982	0.54102	0.45898		252.975	0.6048	0.3952		252.987	0.65986	0.34014		252.98	0.73087	0.26913		252.997	0.82683	0.17317		234.005	0.936	0.064		234.007	0.93457	0.06543		252.979	0.54786	0.45214		252.977	0.53231	0.46769		251.989	0.55329	0.44671
										253.238	0.55615	0.44385		253.232	0.59475	0.40525		253.243	0.6624	0.3376		253.235	0.73201	0.26799		253.253	0.80764	0.19236		234.243	0.94874	0.05126		234.244	0.93362	0.06638		253.235	0.52553	0.47447		253.234	0.56311	0.43689		252.243	0.56732	0.43268
										253.494	0.54283	0.45717		253.488	0.596	0.404		253.499	0.66371	0.33629		253.492	0.67315	0.32685		253.509	0.83625	0.16375		234.479	0.91757	0.08243		234.48	0.9438	0.0562		253.491	0.5077	0.4923		253.49	0.53012	0.46988		252.498	0.56129	0.43871
										253.75	0.53681	0.46319		253.744	0.59468	0.40532		253.755	0.66762	0.33238		253.748	0.7267	0.2733		253.765	0.82146	0.17854		234.716	0.92697	0.07303		234.717	0.95275	0.04725		253.747	0.45384	0.54616		253.746	0.54085	0.45915		252.754	0.56998	0.43002
										254.006	0.54727	0.45273		254	0.596	0.404		254.011	0.66787	0.33213		254.004	0.71989	0.28011		254.021	0.8157	0.1843		234.954	0.93643	0.06357		234.954	0.94604	0.05396		254.003	0.54975	0.45025		254.001	0.53032	0.46968		253.008	0.5804	0.4196
										254.262	0.54953	0.45047		254.255	0.60388	0.39612		254.267	0.66183	0.33817		254.26	0.72222	0.27778		254.277	0.82307	0.17693		235.19	0.93228	0.06772		235.191	0.92658	0.07342		254.259	0.54603	0.45397		254.257	0.53503	0.46497		253.263	0.57517	0.42483
										254.519	0.53757	0.46243		254.512	0.58173	0.41827		254.523	0.66472	0.33528		254.517	0.83731	0.16269		254.534	0.79126	0.20874		235.428	0.93852	0.06148		235.429	0.93743	0.06257		254.516	0.51902	0.48098		254.514	0.53132	0.46868		253.518	0.58607	0.41393
										254.774	0.52941	0.47059		254.769	0.59471	0.40529		254.779	0.65702	0.34298		254.772	0.73324	0.26676		254.79	0.82682	0.17318		235.663	0.93803	0.06197		235.665	0.93566	0.06434		254.771	0.52456	0.47544		254.77	0.52266	0.47734		253.773	0.5745	0.4255
										255.03	0.53572	0.46428		255.024	0.60121	0.39879		255.035	0.67208	0.32792		255.027	0.72346	0.27654		255.045	0.81452	0.18548		235.901	0.92982	0.07018		235.902	0.93507	0.06493		255.027	0.53409	0.46591		255.026	0.5219	0.4781		254.029	0.57433	0.42567
										255.286	0.52812	0.47188		255.28	0.60085	0.39915		255.292	0.66241	0.33759		255.284	0.71928	0.28072		255.302	0.80425	0.19575		236.138	0.94034	0.05966		236.138	0.932	0.068		255.283	0.39043	0.60957		255.282	0.52619	0.47381		254.283	0.57888	0.42112
										255.543	0.53561	0.46439		255.536	0.61295	0.38705		255.547	0.65865	0.34135		255.54	0.73217	0.26783		255.558	0.82133	0.17867		236.375	0.94868	0.05132		236.376	0.93442	0.06558		255.539	0.47009	0.52991		255.538	0.54462	0.45538		254.538	0.5747	0.4253
										255.799	0.45238	0.54762		255.792	0.59436	0.40564		255.804	0.67666	0.32334		255.796	0.70859	0.29141		255.813	0.82799	0.17201		236.61	0.93483	0.06517		236.613	0.93904	0.06096		255.795	0.53012	0.46988		255.794	0.50843	0.49157		254.793	0.58923	0.41077
										256.055	0.53807	0.46193		256.048	0.58498	0.41502		256.059	0.82637	0.17363		256.052	0.72038	0.27962		256.07	0.82182	0.17818		236.847	0.93985	0.06015		236.848	0.93981	0.06019		256.051	0.60958	0.39042		256.05	0.50879	0.49121		255.049	0.57102	0.42898
										256.311	0.52727	0.47273		256.304	0.59748	0.40252		256.316				256.307	0.72472	0.27528		256.326	0.83346	0.16654		237.084	0.94223	0.05777		237.085	0.9257	0.0743		256.307	0.54961	0.45039		256.305	0.55661	0.44339		255.304	0.57327	0.42673
										256.567	0.53877	0.46123		256.559	0.59848	0.40152		256.572	0.66576	0.33424		256.564	0.73029	0.26971		256.581	0.81919	0.18081		237.322	0.91895	0.08105		237.322	0.9367	0.0633		256.564	0.52605	0.47395		256.561	0.55679	0.44321		255.559	0.56999	0.43001
										256.823	0.54147	0.45853		256.816	0.60775	0.39225		256.828	0.66807	0.33193		256.821	0.70828	0.29172		256.837	0.82247	0.17753		237.559	0.94884	0.05116		237.56	0.90922	0.09078		256.819	0.53575	0.46425		256.818	0.55063	0.44937		255.814	0.58108	0.41892
										257.079	0.54688	0.45312		257.072	0.5937	0.4063		257.084	0.64866	0.35134		257.076	0.68494	0.31506		257.093	0.82847	0.17153		237.795	0.93406	0.06594		237.797	0.93557	0.06443		257.075	0.54245	0.45755		257.074	0.51827	0.48173		256.069	0.57483	0.42517
										257.335	0.53184	0.46816		257.328	0.60799	0.39201		257.34	0.66934	0.33066		257.333	0.71597	0.28403		257.35	0.82451	0.17549		238.032	0.93204	0.06796		238.033	0.92897	0.07103		257.332	0.51991	0.48009		257.33	0.51983	0.48017		256.324	0.59324	0.40676
										257.591	0.52153	0.47847		257.585	0.60105	0.39895		257.596	0.66393	0.33607		257.588	0.73524	0.26476		257.606	0.82832	0.17168		238.269	0.92189	0.07811		238.27	0.93994	0.06006		257.588	0.52436	0.47564		257.586	0.54929	0.45071		256.579	0.57365	0.42635
										257.848	0.58387	0.41613		257.84	0.60513	0.39487		257.852	0.66723	0.33277		257.844	0.71441	0.28559		257.862	0.82388	0.17612		238.506	0.94886	0.05114		238.507	0.94281	0.05719		257.844	0.50457	0.49543		257.842	0.54083	0.45917		256.834	0.58442	0.41558
										258.103	0.53648	0.46352		258.096	0.59961	0.40039		258.108	0	1		258.1	0.72655	0.27345		258.118	0.79995	0.20005		238.743	0.93723	0.06277		238.744	0.94196	0.05804		258.1	0.53224	0.46776		258.098	0.53239	0.46761		257.09	0.57586	0.42414
										258.359	0.55024	0.44976		258.353	0.59565	0.40435		258.364	1.01172	-0.01172		258.356	0.71508	0.28492		258.373	0.80924	0.19076		238.98	0.93827	0.06173		238.981	0.9293	0.0707		258.356	0.51759	0.48241		258.355	0.54433	0.45567		257.344	0.5759	0.4241
										258.616	0.54448	0.45552		258.609	0.60019	0.39981		258.62	0.63022	0.36978		258.613	0.71903	0.28097		258.63	0.8055	0.1945		239.216	0.93897	0.06103		239.217	0.93348	0.06652		258.612	0.5341	0.4659		258.61	0.52969	0.47031		257.599	0.57808	0.42192
										258.872	0.53063	0.46937		258.865	0.60792	0.39208		258.876	1.01172	-0.01172		258.869	0.75805	0.24195		258.887	0.81801	0.18199		239.453	0.93149	0.06851		239.455	0.92667	0.07333		258.868	0.52083	0.47917		258.866	0.54631	0.45369		257.854	0.57472	0.42528
										259.128	0.53923	0.46077		259.12	0.5957	0.4043		259.132	0.74662	0.25338		259.125	0.72526	0.27474		259.142	0.81716	0.18284		239.691	0.92251	0.07749		239.691	0.93645	0.06355		259.124	0.59868	0.40132		259.123	0.54359	0.45641		258.11	0.567	0.433
										259.384	0.52058	0.47942		259.377	0.58984	0.41016		259.389	0.66398	0.33602		259.38	0.71808	0.28192		259.398	0.8163	0.1837		239.927	0.93828	0.06172		239.929	0.93717	0.06283		259.38	0.50271	0.49729		259.378	0.53827	0.46173		258.364	0.56632	0.43368
										259.639	0.53926	0.46074		259.633	0.59748	0.40252		259.644	0.65034	0.34966		259.637	0.74814	0.25186		259.655	0.82887	0.17113		240.165	0.94508	0.05492		240.166	0.92856	0.07144		259.636	0.52533	0.47467		259.634	0.51707	0.48293		258.619	0.56401	0.43599
										259.896	0.54415	0.45585		259.889	0.59894	0.40106		259.9	0.67881	0.32119		259.893	0.68731	0.31269		259.911	0.82269	0.17731		240.401	0.93573	0.06427		240.401	0.93391	0.06609		259.892	0.39001	0.60999		259.89	0.51869	0.48131		258.875	0.56799	0.43201
										260.151	0.53638	0.46362		260.145	0.59622	0.40378		260.156	0.66014	0.33986		260.149	0.68	0.32		260.167	0.82151	0.17849		240.637	0.92842	0.07158		240.638	0.94389	0.05611		260.149	0.52611	0.47389		260.147	0.50717	0.49283		259.129	0.56045	0.43955
										260.408	0.57267	0.42733		260.4	0.60753	0.39247		260.412	0.65773	0.34227		260.405	0.67929	0.32071		260.423	0.82205	0.17795		240.875	0.93742	0.06258		240.875	0.92754	0.07246		260.404	0.60367	0.39633		260.402	0.5101	0.4899		259.385	0.56386	0.43614
										260.664	0.51241	0.48759		260.657	0.60715	0.39285		260.669	0.66815	0.33185		260.661	0.71373	0.28627		260.679	0.82273	0.17727		241.111	0.93531	0.06469		241.113	0.93471	0.06529		260.661	0	1		260.658	0.55208	0.44792		259.639	0.56772	0.43228
										260.919	0.51585	0.48415		260.913	0.58863	0.41137		260.924	0.66079	0.33921		260.917	0.7124	0.2876		260.934	0.81954	0.18046		241.348	0.94638	0.05362		241.348	0.93594	0.06406		260.916	0.47141	0.52859		260.915	0.53613	0.46387		259.895	0.52218	0.47782
										261.176	0.51136	0.48864		261.169	0.60006	0.39994		261.18	0.66388	0.33612		261.173	0.70355	0.29645		261.191	0.81961	0.18039		241.586	0.94722	0.05278		241.586	0.93669	0.06331		261.172	0.53545	0.46455		261.171	0.54325	0.45675		260.149	0.57815	0.42185
										261.432	0.54249	0.45751		261.425	0.59834	0.40166		261.437	0.66009	0.33991		261.429	0.72643	0.27357		261.447	0.82848	0.17152		241.822	0.94425	0.05575		241.823	0.94566	0.05434		261.429	0.52097	0.47903		261.426	0.53079	0.46921		260.404	0.57155	0.42845
										261.688	0.55242	0.44758		261.681	0.59397	0.40603		261.693	0.65103	0.34897		261.685	0.70237	0.29763		261.703	0.82808	0.17192		242.059	0.93647	0.06353		242.059	0.93724	0.06276		261.684	0.52133	0.47867		261.683	0.54364	0.45636		260.659	0.56325	0.43675
										261.945	0.53054	0.46946		261.938	0.60148	0.39852		261.949	0.65009	0.34991		261.941	0.6691	0.3309		261.959	0.82168	0.17832		242.296	0.94501	0.05499		242.297	0.93215	0.06785		261.941	0.56501	0.43499		261.939	0.50998	0.49002		260.914	0.57225	0.42775
										262.2	0.51862	0.48138		262.193	0.61001	0.38999		262.205	0.65561	0.34439		262.197	0.6823	0.3177		262.215	0.8231	0.1769		242.533	0.9481	0.0519		242.533	0.93605	0.06395		262.196	0.51912	0.48088		262.195	0.53168	0.46832		261.17	0.54991	0.45009
										262.456	0.5373	0.4627		262.449	0.60385	0.39615		262.461	0.66062	0.33938		262.453	0.70283	0.29717		262.47	0.82448	0.17552		242.77	0.9358	0.0642		242.771	0.93612	0.06388		262.453	0.51626	0.48374		262.451	0.58991	0.41009		261.425	0.57909	0.42091
										262.712	0.54412	0.45588		262.705	0.59109	0.40891		262.717	0.64692	0.35308		262.709	0.70224	0.29776		262.728	0.81821	0.18179		243.007	0.94767	0.05233		243.007	0.92767	0.07233		262.708	0.26721	0.73279		262.707	0.54382	0.45618		261.68	0.57743	0.42257
										262.968	0.50999	0.49001		262.962	0.59072	0.40928		262.973	0.66286	0.33714		262.965	0.72342	0.27658		262.983	0.82041	0.17959		243.244	0.94251	0.05749		243.243	0.92962	0.07038		262.964	0.53729	0.46271		262.963	0.53585	0.46415		261.936	0.57172	0.42828
										263.224	0.5363	0.4637		263.218	0.58789	0.41211		263.228	0.65715	0.34285		263.221	0.7299	0.2701		263.239	0.8099	0.1901		243.48	0.93465	0.06535		243.48	0.9329	0.0671		263.22	0.56161	0.43839		263.219	0.53958	0.46042		262.19	0.56068	0.43932
										263.48	0.53774	0.46226		263.473	0.59787	0.40213		263.485	0.66375	0.33625		263.477	0.73068	0.26932		263.495	0.8016	0.1984		243.718	0.9454	0.0546		243.717	0.93725	0.06275		263.477	0.52407	0.47593		263.475	0.51249	0.48751		262.446	0.57511	0.42489
										263.737	0.50591	0.49409		263.73	0.58554	0.41446		263.741	0.65533	0.34467		263.733	0.71437	0.28563		263.751	0.82823	0.17177		243.954	0.93755	0.06245		243.954	0.93388	0.06612		263.733	0.53131	0.46869		263.732	0.54061	0.45939		262.701	0.55964	0.44036
										263.992	0.53442	0.46558		263.986	0.5929	0.4071		263.997	0.6679	0.3321		263.989	0.7171	0.2829		264.007	0.81559	0.18441		244.192	0.94315	0.05685		244.191	0.92798	0.07202		263.989	0.52835	0.47165		263.987	0.52119	0.47881		262.955	0.55858	0.44142
										264.248	0.52417	0.47583		264.241	0.6146	0.3854		264.253	0.65663	0.34337		264.246	0.72109	0.27891		264.263	0.79286	0.20714		244.428	0.93006	0.06994		244.428	0.92885	0.07115		264.245	0.53729	0.46271		264.243	0.54624	0.45376		263.211	0.56783	0.43217
										264.505	0.52417	0.47583		264.498	0.59197	0.40803		264.51	0.64229	0.35771		264.502	0.70937	0.29063		264.519	0.80772	0.19228		244.665	0.90842	0.09158		244.664	0.93189	0.06811		264.502	0.53811	0.46189		264.5	0.51133	0.48867		263.466	0.56794	0.43206
										264.761	0.5403	0.4597		264.753	0.59278	0.40722		264.766	0.67126	0.32874		264.758	0.72556	0.27444		264.776	0.82277	0.17723		244.901	0.92057	0.07943		244.901	0.93428	0.06572		264.757	0.4993	0.5007		264.756	0.53713	0.46287		263.72	0.55917	0.44083
										265.017	0.51183	0.48817		265.009	0.5994	0.4006		265.021	0.66073	0.33927		265.014	0.71913	0.28087		265.031	0.80602	0.19398		245.138	0.92524	0.07476		245.138	0.93661	0.06339		265.013	0.53487	0.46513		265.012	0.54215	0.45785		263.976	0.55557	0.44443
										265.273	0.52272	0.47728		265.266	0.5871	0.4129		265.278	0.65039	0.34961		265.269	0.70459	0.29541		265.288	0.82046	0.17954		245.376	0.93653	0.06347		245.375	0.92792	0.07208		265.269	0.66626	0.33374		265.268	0.50027	0.49973		264.231	0.56228	0.43772
										265.528	0.53078	0.46922		265.521	0.59905	0.40095		265.533	0.65343	0.34657		265.526	0.7175	0.2825		265.543	0.80477	0.19523		245.613	0.92919	0.07081		245.612	0.93149	0.06851		265.526	0.68556	0.31444		265.524	0.54579	0.45421		264.486	0.56673	0.43327
										265.785	0.52235	0.47765		265.777	0.58925	0.41075		265.789	0.66207	0.33793		265.781	0.73352	0.26648		265.799	0.82269	0.17731		245.85	0.93917	0.06083		245.848	0.93053	0.06947		265.781	0.43205	0.56795		265.78	0.53567	0.46433		264.74	0.56825	0.43175
										266.041	0.53885	0.46115		266.034	0.58645	0.41355		266.045	0.66242	0.33758		266.038	0.7134	0.2866		266.056	0.80644	0.19356		246.086	0.94119	0.05881		246.085	0.92834	0.07166		266.037	0.52816	0.47184		266.036	0.52388	0.47612		264.995	0.56287	0.43713
										266.297	0.52753	0.47247		266.29	0.6017	0.3983		266.301	0.65031	0.34969		266.294	0.73847	0.26153		266.312	0.81608	0.18392		246.323	0.92295	0.07705		246.322	0.93242	0.06758		266.293	0.52658	0.47342		266.291	0.53906	0.46094		265.25	0.56509	0.43491
										266.553	0.54432	0.45568		266.546	0.5907	0.4093		266.558	0.65407	0.34593		266.55	0.71439	0.28561		266.568	0.81598	0.18402		246.56	0.9362	0.0638		246.56	0.94081	0.05919		266.55	0.54193	0.45807		266.548	0.55658	0.44342		265.506	0.56484	0.43516
										266.809	0.52861	0.47139		266.802	0.59188	0.40812		266.813	0.65719	0.34281		266.806	0.71734	0.28266		266.823	0.82483	0.17517		246.796	0.93484	0.06516		246.797	0.93271	0.06729		266.806	0.52921	0.47079		266.804	0.55691	0.44309		265.761	0.56132	0.43868
										267.065	0.53621	0.46379		267.058	0.58527	0.41473		267.07	0.65629	0.34371		267.062	0.72286	0.27714		267.079	0.82083	0.17917		247.034	0.92076	0.07924		247.034	0.93706	0.06294		267.061	0.52254	0.47746		267.059	0.54869	0.45131		266.015	0.55599	0.44401
										267.32	0.52915	0.47085		267.314	0.58545	0.41455		267.326	0.66004	0.33996		267.318	0.6845	0.3155		267.336	0.81525	0.18475		247.271	0.93262	0.06738		247.27	0.92694	0.07306		267.318	0.46968	0.53032		267.316	0.53126	0.46874		266.271	0.57054	0.42946
										267.577	0.53098	0.46902		267.571	0.58587	0.41413		267.582	0.64224	0.35776		267.574	0.70042	0.29958		267.592	0.81751	0.18249		247.508	0.93552	0.06448		247.507	0.93455	0.06545		267.574	0.52847	0.47153		267.573	0.51022	0.48978		266.525	0.55022	0.44978
										267.833	0.56965	0.43035		267.826	0.58699	0.41301		267.837	0.64908	0.35092		267.83	0.70546	0.29454		267.848	0.80614	0.19386		247.744	0.94405	0.05595		247.744	0.95504	0.04496		267.83	0.5515	0.4485		267.829	0.54923	0.45077		266.781	0.56796	0.43204
										268.089	0.54308	0.45692		268.082	0.58682	0.41318		268.094	0.65432	0.34568		268.087	0.71332	0.28668		268.104	0.82551	0.17449		247.981	0.93509	0.06491		247.981	0.93692	0.06308		268.086	0.53539	0.46461		268.085	0.54701	0.45299		267.036	0.63283	0.36717
										268.345	0.53681	0.46319		268.338	0.60064	0.39936		268.35	0.65118	0.34882		268.342	0.8564	0.1436		268.359	0.81276	0.18724		248.218	0.94267	0.05733		248.217	0.93342	0.06658		268.342	0.51879	0.48121		268.341	0.54039	0.45961		267.291	0.56658	0.43342
										268.601	0.54083	0.45917		268.594	0.59054	0.40946		268.607	0.64085	0.35915		268.598	0.69846	0.30154		268.617	0.82031	0.17969		248.455	0.92668	0.07332		248.454	0.93017	0.06983		268.597	0.66031	0.33969		268.597	0.52438	0.47562		267.546	0.57046	0.42954
										268.857	0.54688	0.45312		268.851	0.59241	0.40759		268.862	0.65777	0.34223		268.855	0.71083	0.28917		268.872	0.81123	0.18877		248.692	0.93011	0.06989		248.691	0.91903	0.08097		268.854	0.52019	0.47981		268.853	0.53171	0.46829		267.801	0.56272	0.43728
										269.113	0.51809	0.48191		269.106	0.57987	0.42013		269.118	0.65062	0.34938		269.11	0.71296	0.28704		269.128	0.81767	0.18233		248.928	0.92566	0.07434		248.928	0.9468	0.0532		269.11	0.52432	0.47568		269.11	0.52652	0.47348		268.056	0.56726	0.43274
										269.37	0.49622	0.50378		269.362	0.5957	0.4043		269.375	0.64631	0.35369		269.367	0.70441	0.29559		269.385	0.80327	0.19673		249.165	0.92382	0.07618		249.165	0.93688	0.06312		269.366	0.51738	0.48262		269.365	0.52223	0.47777		268.312	0.56862	0.43138
										269.626	0.53155	0.46845		269.619	0.59419	0.40581		269.63	0.65642	0.34358		269.623	0.6865	0.3135		269.641	0.81616	0.18384		249.403	0.92835	0.07165		249.402	0.93754	0.06246		269.622	0.4105	0.5895		269.621	0.51693	0.48307		268.567	0.56709	0.43291
										269.882	0.53607	0.46393		269.874	0.59474	0.40526		269.887	0.65515	0.34485		269.879	0.65947	0.34053		269.896	0.82192	0.17808		249.64	0.93557	0.06443		249.638	0.93859	0.06141		269.878	0.53568	0.46432		269.877	0.5389	0.4611		268.822	0.56782	0.43218
										270.138	0.53524	0.46476		270.13	0.58579	0.41421		270.142	0.65674	0.34326		270.134	0.72079	0.27921		270.152	0.81618	0.18382		249.877	0.91873	0.08127		249.875	0.95134	0.04866		270.134	0.52871	0.47129		270.133	0.53423	0.46577		269.077	0.57001	0.42999
										270.393	0.50626	0.49374		270.387	0.59161	0.40839		270.398	0.71541	0.28459		270.391	0.71022	0.28978		270.408	0.80054	0.19946		250.112	0.92253	0.07747		250.111	0.93228	0.06772		270.391	0.5218	0.4782		270.389	0.54841	0.45159		269.333	0.5825	0.4175
										270.65	0.50396	0.49604		270.643	0.58352	0.41648		270.658	0.62632	0.37368		270.647	0.71613	0.28387		270.664	0.8258	0.1742		250.349	0.91343	0.08657		250.349	0.95184	0.04816		270.647	0.57203	0.42797		270.645	0.53748	0.46252		269.587	0.56976	0.43024
										270.905	0.52474	0.47526		270.899	0.58869	0.41131		270.913	0.64506	0.35494		270.902	0.73629	0.26371		270.92	0.81741	0.18259		250.587	0.9315	0.0685		250.586	0.94843	0.05157		270.902	0.53079	0.46921		270.902	0.55441	0.44559		269.843	0.56203	0.43797
										271.162	0.54369	0.45631		271.155	0.59673	0.40327		271.169	0.65277	0.34723		271.159	0.70406	0.29594		271.176	0.81512	0.18488		250.823	0.92565	0.07435		250.822	0.93324	0.06676		271.158	0.51554	0.48446		271.158	0.5199	0.4801		270.097	0.56725	0.43275
										271.417	0.525	0.475		271.411	0.58405	0.41595		271.426	0.65493	0.34507		271.415	0.71997	0.28003		271.433	0.81066	0.18934		251.061	0.93272	0.06728		251.059	0.93399	0.06601		271.414	0.43448	0.56552		271.414	0.5692	0.4308		270.352	0.55728	0.44272
										271.674	0.52528	0.47472		271.667	0.58958	0.41042		271.682	0.63024	0.36976		271.671	0.71564	0.28436		271.689	0.79358	0.20642		251.297	0.96112	0.03888		251.296	0.9267	0.0733		271.671	0.55229	0.44771		271.669	0.51382	0.48618		270.607	0.35932	0.64068
										271.931	0.52799	0.47201		271.923	0.58258	0.41742		271.937	0.64278	0.35722		271.927	0.70429	0.29571		271.944	0.81006	0.18994		251.533	0.91974	0.08026		251.534	0.94317	0.05683		271.927	0.52192	0.47808		271.925	0.5001	0.4999		270.863	0.56018	0.43982
										272.186	0.51423	0.48577		272.178	0.57674	0.42326		272.193	0.64612	0.35388		272.183	0.69342	0.30658		272.201	0.81249	0.18751		251.77	0.94031	0.05969		251.771	0.94489	0.05511		272.182	0.51991	0.48009		272.182	0.53452	0.46548		271.118	0.55913	0.44087
										272.442	0.54297	0.45703		272.435	0.58464	0.41536		272.45	0.65045	0.34955		272.439	0.69382	0.30618		272.457	0.82045	0.17955		252.007	0.94284	0.05716		252.006	0.93105	0.06895		272.438	0.54842	0.45158		272.438	0.55851	0.44149		271.373	0.56803	0.43197
										272.698	0.55705	0.44295		272.69	0.59142	0.40858		272.705	0.64225	0.35775		272.695	0.70805	0.29195		272.713	0.81553	0.18447		252.243	0.94298	0.05702		252.243	0.9257	0.0743		272.695	0.52157	0.47843		272.693	0.53863	0.46137		271.628	0.56013	0.43987
										272.954	0.56595	0.43405		272.947	0.6041	0.3959		272.962	0.64541	0.35459		272.951	0.70178	0.29822		272.968	0.81943	0.18057		252.48	0.93524	0.06476		252.48	0.94062	0.05938		272.95	0.51082	0.48918		272.95	0.52857	0.47143		271.884	0.55745	0.44255
										273.21	0.53992	0.46008		273.203	0.57972	0.42028		273.217	0.63731	0.36269		273.207	0.70291	0.29709		273.225	0.81058	0.18942		252.718	0.94675	0.05325		252.717	0.92805	0.07195		273.206	0.57583	0.42417		273.206	0.538	0.462		272.138	0.55747	0.44253
										273.467	0.52358	0.47642		273.459	0.59192	0.40808		273.474	1.01172	-0.01172		273.464	0.70701	0.29299		273.481	0.81271	0.18729		252.955	0.93851	0.06149		252.953	0.93542	0.06458		273.462	0.5254	0.4746		273.462	0.51894	0.48106		272.394	0.56227	0.43773
										273.723	0.51766	0.48234		273.715	0.57342	0.42658		273.73	0.63887	0.36113		273.72	0.70689	0.29311		273.737	0.81803	0.18197		253.192	0.93571	0.06429		253.19	0.92657	0.07343		273.719	0.51634	0.48366		273.718	0.53748	0.46252		272.647	0.55465	0.44535
										273.978	0.49812	0.50188		273.972	0.58781	0.41219		273.985	0.64683	0.35317		273.975	0.71096	0.28904		273.992	0.79078	0.20922		253.428	0.93727	0.06273		253.427	0.92775	0.07225		273.974	0.53684	0.46316		273.974	0.54082	0.45918		272.904	0.55785	0.44215
										274.234	0.5206	0.4794		274.227	0.58603	0.41397		274.242	0.65388	0.34612		274.231	0.70626	0.29374		274.248	0.81483	0.18517		253.666	0.95482	0.04518		253.664	0.95105	0.04895		274.23	0.52421	0.47579		274.231	0.51728	0.48272		273.158	0.57676	0.42324
										274.49	0.54886	0.45114		274.483	0.58532	0.41468		274.498	0.65925	0.34075		274.487	0.58632	0.41368		274.506	0.80423	0.19577		253.901	0.94235	0.05765		253.901	0.93481	0.06519		274.487	0.53181	0.46819		274.486	0.5302	0.4698		273.413	0.54661	0.45339
										274.746	0.54616	0.45384		274.74	0.58417	0.41583		274.754	0.64547	0.35453		274.743	0.71576	0.28424		274.762	0.81512	0.18488		254.139	0.92317	0.07683		254.137	0.91584	0.08416		274.743	0.51544	0.48456		274.742	0.50699	0.49301		273.668	0.5631	0.4369
										275.003	0.52778	0.47222		274.995	0.57895	0.42105		275.01	0.6192	0.3808		274.999	0.72452	0.27548		275.017	0.81221	0.18779		254.376	0.95277	0.04723		254.375	0.94565	0.05435		274.999	0.54863	0.45137		274.999	0.53219	0.46781		273.923	0.56128	0.43872
										275.258	0.53333	0.46667		275.252	0.57862	0.42138		275.266	0.64237	0.35763		275.256	0.70276	0.29724		275.273	0.80312	0.19688		254.613	0.93033	0.06967		254.612	0.91734	0.08266		275.255	0.52706	0.47294		275.254	0.53501	0.46499		274.178	0.56841	0.43159
										275.515	0.52674	0.47326		275.508	0.58752	0.41248		275.522	0.65135	0.34865		275.512	0.71977	0.28023		275.529	0.81976	0.18024		254.849	0.93737	0.06263		254.849	0.94432	0.05568		275.511	0.56703	0.43297		275.51	0.52254	0.47746		274.434	0.55731	0.44269
										275.771	0.50257	0.49743		275.764	0.61053	0.38947		275.778	0.63913	0.36087		275.768	0.7199	0.2801		275.786	0.8028	0.1972		255.086	0.93516	0.06484		255.085	0.93125	0.06875		275.767	0.41752	0.58248		275.766	0.52819	0.47181		274.688	0.56756	0.43244
										276.026	0.54182	0.45818		276.019	0.5805	0.4195		276.035	0.64095	0.35905		276.023	0.71178	0.28822		276.041	0.80076	0.19924		255.323	0.92624	0.07376		255.323	0.93615	0.06385		276.023	0.51501	0.48499		276.023	0.50769	0.49231		274.944	0.56299	0.43701
										276.282	0.50488	0.49512		276.276	0.49635	0.50365		276.29	0.64616	0.35384		276.28	0.69601	0.30399		276.297	0.81623	0.18377		255.561	0.92964	0.07036		255.559	0.92403	0.07597		276.279	0.52474	0.47526		276.279	0.52649	0.47351		275.199	0.5535	0.4465
										276.539	0.52453	0.47547		276.532	0.58682	0.41318		276.546	0.64869	0.35131		276.536	0.70958	0.29042		276.553	0.82344	0.17656		255.797	0.92339	0.07661		255.796	0.93708	0.06292		276.535	0.35573	0.64427		276.534	0.52721	0.47279		275.453	0.55797	0.44203
										276.795	0.61664	0.38336		276.787	0.5702	0.4298		276.802	0.65759	0.34241		276.791	0.72323	0.27677		276.809	0.81828	0.18172		256.034	0.93119	0.06881		256.033	0.93928	0.06072		276.791	0.68551	0.31449		276.79	0.52657	0.47343		275.708	0.57057	0.42943
										277.05	0.53957	0.46043		277.044	0.55735	0.44265		277.059	0.64975	0.35025		277.047	0.65086	0.34914		277.065	0.81416	0.18584		256.271	0.9395	0.0605		256.27	0.92479	0.07521		277.047	0.52256	0.47744		277.047	0.52015	0.47985		275.964	0.56273	0.43727
										277.306	0.53233	0.46767		277.3	0.55866	0.44134		277.315	0.63174	0.36826		277.304	0.7117	0.2883		277.322	0.79942	0.20058		256.508	0.9423	0.0577		256.507	0.92399	0.07601		277.303	0.57925	0.42075		277.302	0.5302	0.4698		276.218	0.55895	0.44105
										277.562	0.52079	0.47921		277.556	0.58592	0.41408		277.571	0.64146	0.35854		277.56	0.70686	0.29314		277.578	0.80297	0.19703		256.744	0.93432	0.06568		256.744	0.92737	0.07263		277.559	0.51751	0.48249		277.559	0.51339	0.48661		276.474	0.55841	0.44159
										277.819	0.53721	0.46279		277.812	0.58381	0.41619		277.826	0.63995	0.36005		277.816	0.71626	0.28374		277.834	0.81008	0.18992		256.982	0.92598	0.07402		256.98	0.93075	0.06925		277.816	0.4944	0.5056		277.814	0.5361	0.4639		276.728	0.55881	0.44119
										278.075	0.52438	0.47562		278.068	0.58774	0.41226		278.083	0.65394	0.34606		278.072	0.73084	0.26916		278.09	0.81564	0.18436		257.219	0.93217	0.06783		257.217	0.92773	0.07227		278.072	0.49787	0.50213		278.07	0.53312	0.46688		276.984	0.57564	0.42436
										278.331	0.46022	0.53978		278.324	0.58816	0.41184		278.339	0.64932	0.35068		278.329	0.70956	0.29044		278.346	0.81614	0.18386		257.454	0.94201	0.05799		257.454	0.92813	0.07187		278.328	0.48286	0.51714		278.327	0.52345	0.47655		277.239	0.55819	0.44181
										278.587	0.50132	0.49868		278.58	0.58966	0.41034		278.594	0.64103	0.35897		278.584	0.7	0.3		278.602	0.81741	0.18259		257.692	0.9421	0.0579		257.692	0.93731	0.06269		278.584	0.53094	0.46906		278.584	0.55319	0.44681		277.494	0.56118	0.43882
										278.843	0.53817	0.46183		278.836	0.59067	0.40933		278.851	0.64798	0.35202		278.84	0.72632	0.27368		278.858	0.79807	0.20193		257.929	0.94543	0.05457		257.928	0.92707	0.07293		278.84	0.4802	0.5198		278.839	0.51606	0.48394		277.749	0.55455	0.44545
										279.099	0.53075	0.46925		279.092	0.58085	0.41915		279.106	0.65345	0.34655		279.096	0.72514	0.27486		279.114	0.79955	0.20045		258.166	0.93013	0.06987		258.164	0.928	0.072		279.096	0.50238	0.49762		279.095	0.53679	0.46321		278.004	0.55945	0.44055
										279.355	0.52072	0.47928		279.349	0.58428	0.41572		279.363	0.6223	0.3777		279.352	0.71031	0.28969		279.37	0.7961	0.2039		258.401	0.92774	0.07226		258.401	0.93186	0.06814		279.352	0.51858	0.48142		279.351	0.52098	0.47902		278.26	0.55645	0.44355
										279.611	0.53334	0.46666		279.605	0.59066	0.40934		279.618	0.66334	0.33666		279.608	0.70464	0.29536		279.627	0.79827	0.20173		258.639	0.91608	0.08392		258.639	0.92886	0.07114		279.608	0.51477	0.48523		279.607	0.53193	0.46807		278.514	0.5714	0.4286
										279.867	0.52648	0.47352		279.86	0.57311	0.42689		279.876	0.63712	0.36288		279.864	0.69918	0.30082		279.882	0.81003	0.18997		258.875	0.93305	0.06695		258.876	0.94944	0.05056		279.864	0.66167	0.33833		279.863	0.51535	0.48465		278.77	0.5741	0.4259
										280.123	0.53027	0.46973		280.116	0.5813	0.4187		280.131	0.41755	0.58245		280.121	0.72233	0.27767		280.138	0.81704	0.18296		259.113	0.92883	0.07117		259.111	0.93406	0.06594		280.12	0.5301	0.4699		280.119	0.51692	0.48308		279.024	0.56316	0.43684
										280.379	0.55432	0.44568		280.373	0.58306	0.41694		280.387	0.65372	0.34628		280.377	0.70637	0.29363		280.394	0.81699	0.18301		259.349	0.94393	0.05607		259.349	0.94022	0.05978		280.376	0.51468	0.48532		280.375	0.52958	0.47042		279.279	0.56314	0.43686
										280.636	0.51308	0.48692		280.629	0.57902	0.42098		280.643	0.64951	0.35049		280.632	0.71099	0.28901		280.65	0.81283	0.18717		259.586	0.93278	0.06722		259.585	0.93165	0.06835		280.632	0.51142	0.48858		280.632	0.50999	0.49001		279.535	0.57297	0.42703
										280.892	0.52134	0.47866		280.884	0.57501	0.42499		280.9	0.64925	0.35075		280.888	0.69909	0.30091		280.907	0.8078	0.1922		259.823	0.92398	0.07602		259.823	0.93565	0.06435		280.888	0.48588	0.51412		280.887	0.52253	0.47747		279.789	0.56276	0.43724
										281.147	0.52409	0.47591		281.14	0.58348	0.41652		281.155	0.64388	0.35612		281.144	0.71363	0.28637		281.162	0.8136	0.1864		260.06	0.93559	0.06441		260.058	0.92625	0.07375		281.144	0.53811	0.46189		281.144	0.52779	0.47221		280.044	0.57894	0.42106
										281.404	0.53267	0.46733		281.397	0.57719	0.42281		281.412	0.64572	0.35428		281.401	0.70816	0.29184		281.419	0.80944	0.19056		260.297	0.94254	0.05746		260.295	0.92796	0.07204		281.4	0.50844	0.49156		281.399	0.53118	0.46882		280.299	0.55737	0.44263
										281.66	0.51573	0.48427		281.652	0.57639	0.42361		281.668	0.65371	0.34629		281.657	0.69187	0.30813		281.675	0.79279	0.20721		260.534	0.91694	0.08306		260.533	0.9485	0.0515		281.657	0.51487	0.48513		281.656	0.52627	0.47373		280.554	0.56719	0.43281
										281.916	0.52694	0.47306		281.909	0.58281	0.41719		281.923	0.68065	0.31935		281.913	0.67957	0.32043		281.931	0.81569	0.18431		260.77	0.93739	0.06261		260.769	0.92566	0.07434		281.912	0.53169	0.46831		281.912	0.5256	0.4744		280.81	0.55205	0.44795
										282.171	0.5287	0.4713		282.164	0.58075	0.41925		282.18	0.64148	0.35852		282.169	0.7011	0.2989		282.187	0.79885	0.20115		261.007	0.92029	0.07971		261.007	0.91408	0.08592		282.168	0.44315	0.55685		282.168	0.51495	0.48505		281.064	0.5593	0.4407
										282.427	0.52028	0.47972		282.42	0.57906	0.42094		282.436	0.64034	0.35966		282.426	0.70948	0.29052		282.443	0.80548	0.19452		261.245	0.93664	0.06336		261.243	0.94115	0.05885		282.425	0.54876	0.45124		282.424	0.51483	0.48517		281.319	0.5577	0.4423
										282.684	0.531	0.469		282.678	0.58414	0.41586		282.692	0.6412	0.3588		282.681	0.67822	0.32178		282.699	0.81494	0.18506		261.482	0.93278	0.06722		261.48	0.92929	0.07071		282.68	0.51358	0.48642		282.68	0.53243	0.46757		281.575	0.54112	0.45888
										282.94	0.52912	0.47088		282.933	0.57927	0.42073		282.948	0.64407	0.35593		282.936	0.70263	0.29737		282.954	0.80792	0.19208		261.718	0.93107	0.06893		261.717	0.91295	0.08705		282.937	0.52118	0.47882		282.936	0.53504	0.46496		281.83	0.55187	0.44813
										283.196	0.52548	0.47452		283.189	0.58639	0.41361		283.204	0.63561	0.36439		283.193	0.71243	0.28757		283.21	0.81614	0.18386		261.954	0.9459	0.0541		261.955	0.94619	0.05381		283.193	0.42444	0.57556		283.192	0.53238	0.46762		282.085	0.55647	0.44353
										283.452	0.53982	0.46018		283.446	0.5853	0.4147		283.461	0.63941	0.36059		283.449	0.70649	0.29351		283.466	0.80327	0.19673		262.192	0.9342	0.0658		262.191	0.93375	0.06625		283.448	0.50289	0.49711		283.448	0.49642	0.50358		282.34	0.52906	0.47094
										283.709	0.54005	0.45995		283.701	0.58147	0.41853		283.715	0.63856	0.36144		283.705	0.69963	0.30037		283.722	0.80881	0.19119		262.428	0.92814	0.07186		262.428	0.92422	0.07578		283.705	0.50974	0.49026		283.705	0.52176	0.47824		282.595	0.56342	0.43658
										283.965	0.51664	0.48336		283.957	0.57622	0.42378		283.973	0.64192	0.35808		283.961	0.6908	0.3092		283.978	0.81793	0.18207		262.665	0.9283	0.0717		262.665	0.92689	0.07311		283.961	0.51959	0.48041		283.961	0.55269	0.44731		282.851	0.55825	0.44175
										284.22	0.49304	0.50696		284.213	0.58959	0.41041		284.228	0.64316	0.35684		284.217	0.71873	0.28127		284.235	0.81635	0.18365		262.903	0.90758	0.09242		262.901	0.93642	0.06358		284.217	0.69952	0.30048		284.217	0.52471	0.47529		283.105	0.56195	0.43805
										284.476	0.4954	0.5046		284.47	0.58747	0.41253		284.483	0.64552	0.35448		284.474	0.7019	0.2981		284.491	0.81017	0.18983		263.138	0.93529	0.06471		263.139	0.92872	0.07128		284.473	0.51537	0.48463		284.473	0.56079	0.43921		283.36	0.55619	0.44381
										284.733	0.53964	0.46036		284.725	0.5879	0.4121		284.741	0.63868	0.36132		284.729	0.66689	0.33311		284.747	0.79944	0.20056		263.376	0.93198	0.06802		263.375	0.93771	0.06229		284.729	0.5274	0.4726		284.73	0.51462	0.48538		283.615	0.55422	0.44578
										284.988	0.52319	0.47681		284.982	0.58083	0.41917		284.996	0.63881	0.36119		284.985	0.68284	0.31716		285.003	0.81491	0.18509		263.612	0.93171	0.06829		263.612	0.91654	0.08346		284.985	0.63178	0.36822		284.985	0.54294	0.45706		283.87	0.59536	0.40464
										285.245	0.52852	0.47148		285.238	0.58132	0.41868		285.252	0.63324	0.36676		285.242	0.6989	0.3011		285.259	0.78456	0.21544		263.85	0.9338	0.0662		263.849	0.92687	0.07313		285.241	0.54452	0.45548		285.242	0.52767	0.47233		284.126	0.55574	0.44426
										285.501	0.5208	0.4792		285.493	0.59948	0.40052		285.508	0.62165	0.37835		285.497	0.69268	0.30732		285.515	0.78902	0.21098		264.087	0.92185	0.07815		264.086	0.93552	0.06448		285.497	0.59893	0.40107		285.498	0.51911	0.48089		284.38	0.55743	0.44257
										285.756	0.52157	0.47843		285.75	0.58353	0.41647		285.765	0.64625	0.35375		285.753	0.85283	0.14717		285.771	0.81242	0.18758		264.323	0.93434	0.06566		264.323	0.91623	0.08377		285.753	0.51655	0.48345		285.754	0.52066	0.47934		284.635	0.55217	0.44783
										286.012	0.53378	0.46622		286.005	0.58105	0.41895		286.02	0.64682	0.35318		286.01	0.69852	0.30148		286.027	0.79619	0.20381		264.56	0.92898	0.07102		264.561	0.92122	0.07878		286.009	0.5221	0.4779		286.009	0.49602	0.50398		284.89	0.5479	0.4521
										286.269	0.51993	0.48007		286.262	0.57817	0.42183		286.277	0.65026	0.34974		286.265	0.69168	0.30832		286.283	0.80398	0.19602		264.797	0.9475	0.0525		264.796	0.92752	0.07248		286.265	0.6852	0.3148		286.265	0.54016	0.45984		285.146	0.56613	0.43387
										286.525	0.52093	0.47907		286.517	0.58029	0.41971		286.534	0.61402	0.38598		286.521	0.69709	0.30291		286.539	0.81525	0.18475		265.034	0.94194	0.05806		265.033	0.9461	0.0539		286.521	0.50899	0.49101		286.521	0.52311	0.47689		285.4	0.56762	0.43238
										286.78	0.49439	0.50561		286.773	0.57686	0.42314		286.79	0.63741	0.36259		286.777	0.71224	0.28776		286.795	0.8118	0.1882		265.271	0.93667	0.06333		265.27	0.93097	0.06903		286.778	0.78994	0.21006		286.778	0.53995	0.46005		285.656	0.55125	0.44875
										287.037	0.53972	0.46028		287.03	0.57329	0.42671		287.045	0.63248	0.36752		287.034	0.70317	0.29683		287.052	0.80489	0.19511		265.507	0.93437	0.06563		265.507	0.92382	0.07618		287.033	0.64272	0.35728		287.034	0.52857	0.47143		285.91	0.55865	0.44135
										287.293	0.52673	0.47327		287.286	0.58289	0.41711		287.301	0.63133	0.36867		287.29	0.70223	0.29777		287.308	0.79839	0.20161		265.744	0.94595	0.05405		265.744	0.93062	0.06938		287.289	0.55408	0.44592		287.29	0.50091	0.49909		286.166	0.55341	0.44659
										287.549	0.51312	0.48688		287.541	0.57828	0.42172		287.557	0.64813	0.35187		287.546	0.70764	0.29236		287.563	0.81214	0.18786		265.981	0.94727	0.05273		265.98	0.919	0.081		287.545	0.43338	0.56662		287.546	0.50709	0.49291		286.421	0.55218	0.44782
										287.804	0.50157	0.49843		287.798	0.57798	0.42202		287.813	0.63469	0.36531		287.802	0.69963	0.30037		287.819	0.81476	0.18524		266.218	0.92459	0.07541		266.217	0.93763	0.06237		287.801	0.50276	0.49724		287.802	0.51799	0.48201		286.676	0.55477	0.44523
										288.062	0.51242	0.48758		288.054	0.57313	0.42687		288.07	0.64413	0.35587		288.059	0.70021	0.29979		288.076	0.80084	0.19916		266.456	0.93037	0.06963		266.454	0.91147	0.08853		288.058	0.6434	0.3566		288.058	0.53375	0.46625		286.931	0.55252	0.44748
										288.317	0.50363	0.49637		288.31	0.58237	0.41763		288.327	0.63502	0.36498		288.313	0.6465	0.3535		288.332	0.81434	0.18566		266.693	0.9364	0.0636		266.691	0.9328	0.0672		288.313	0.42738	0.57262		288.314	0.49037	0.50963		287.185	0.5599	0.4401
										288.572	0.52696	0.47304		288.566	0.57536	0.42464		288.581	0.6542	0.3458		288.57	0.6795	0.3205		288.588	0.80853	0.19147		266.929	0.92414	0.07586		266.928	0.91715	0.08285		288.569	0.52534	0.47466		288.57	0.53969	0.46031		287.441	0.55389	0.44611
										288.828	0.52407	0.47593		288.822	0.56732	0.43268		288.838	0.62856	0.37144		288.826	0.78659	0.21341		288.844	0.79859	0.20141		267.165	0.93175	0.06825		267.164	0.93374	0.06626		288.826	0.53133	0.46867		288.826	0.53226	0.46774		287.695	0.55993	0.44007
										289.085	0.52198	0.47802		289.077	0.58385	0.41615		289.094	0.64594	0.35406		289.083	0.68202	0.31798		289.1	0.8122	0.1878		267.403	0.94444	0.05556		267.401	0.93416	0.06584		289.082	0.56137	0.43863		289.081	0.50769	0.49231		287.951	0.54376	0.45624
										289.341	0.52817	0.47183		289.334	0.58625	0.41375		289.349	0.64288	0.35712		289.338	0.69475	0.30525		289.356	0.79095	0.20905		267.64	0.92679	0.07321		267.639	0.93478	0.06522		289.337	0.50778	0.49222		289.338	0.51413	0.48587		288.206	0.55425	0.44575
										289.598	0.50983	0.49017		289.59	0.57318	0.42682		289.606	0.62277	0.37723		289.595	0.69249	0.30751		289.612	0.80364	0.19636		267.877	0.93243	0.06757		267.875	0.91949	0.08051		289.594	0.56154	0.43846		289.594	0.52998	0.47002		288.461	0.55597	0.44403
										289.853	0.52344	0.47656		289.846	0.56831	0.43169		289.862	0.64472	0.35528		289.85	0.72884	0.27116		289.868	0.7953	0.2047		268.113	0.93667	0.06333		268.112	0.93051	0.06949		289.85	0.52079	0.47921		289.85	0.50874	0.49126		288.716	0.55941	0.44059
										290.109	0.5568	0.4432		290.102	0.57263	0.42737		290.118	0.64034	0.35966		290.106	0.6929	0.3071		290.124	0.79699	0.20301		268.35	0.93003	0.06997		268.348	0.90963	0.09037		290.106	0.51888	0.48112		290.107	0.50308	0.49692		288.971	0.54586	0.45414
										290.366	0.54007	0.45993		290.358	0.5723	0.4277		290.374	0.63978	0.36022		290.362	0.69735	0.30265		290.379	0.77463	0.22537		268.587	0.9246	0.0754		268.585	0.93356	0.06644		290.362	0.52262	0.47738		290.363	0.50463	0.49537		289.226	0.55098	0.44902
										290.621	0.52844	0.47156		290.614	0.57688	0.42312		290.63	0.64487	0.35513		290.618	0.69251	0.30749		290.636	0.80666	0.19334		268.823	0.93014	0.06986		268.822	0.9248	0.0752		290.618	0.50835	0.49165		290.618	0.51271	0.48729		289.481	0.5468	0.4532
										290.877	0.51244	0.48756		290.87	0.57849	0.42151		290.886	0.62941	0.37059		290.875	0.69421	0.30579		290.892	0.80487	0.19513		269.06	0.9328	0.0672		269.06	0.93771	0.06229		290.874	0.52777	0.47223		290.874	0.50933	0.49067		289.736	0.55277	0.44723
										291.133	0.52013	0.47987		291.127	0.57409	0.42591		291.142	0.62252	0.37748		291.13	0.70115	0.29885		291.148	0.78828	0.21172		269.297	0.93806	0.06194		269.297	0.9234	0.0766		291.131	0.51627	0.48373		291.13	0.51705	0.48295		289.992	0.54925	0.45075
										291.39	0.53997	0.46003		291.383	0.57022	0.42978		291.399	0.62786	0.37214		291.387	0.69121	0.30879		291.404	0.79042	0.20958		269.534	0.92895	0.07105		269.532	0.92336	0.07664		291.387	0.49705	0.50295		291.386	0.53847	0.46153		290.247	0.54746	0.45254
										291.646	0.529	0.471		291.638	0.57566	0.42434		291.654	0.63819	0.36181		291.643	0.70609	0.29391		291.66	0.80878	0.19122		269.771	0.92179	0.07821		269.77	0.91847	0.08153		291.643	0.41974	0.58026		291.642	0.50164	0.49836		290.501	0.54928	0.45072
										291.902	0.49937	0.50063		291.895	0.57587	0.42413		291.91	1.01172	-0.01172		291.899	0.70408	0.29592		291.916	0.80505	0.19495		270.007	0.92859	0.07141		270.006	0.94934	0.05066		291.898	0.50916	0.49084		291.898	0.52957	0.47043		290.757	0.54753	0.45247
										292.158	0.51813	0.48187		292.151	0.57501	0.42499		292.166	0.54426	0.45574		292.155	0.69788	0.30212		292.173	0.7978	0.2022		270.245	0.93209	0.06791		270.244	0.92229	0.07771		292.154	0.52674	0.47326		292.154	0.50968	0.49032		291.012	0.55635	0.44365
										292.414	0.4896	0.5104		292.407	0.57675	0.42325		292.422	0.6432	0.3568		292.41	0.83341	0.16659		292.429	0.80999	0.19001		270.482	0.92628	0.07372		270.48	0.92696	0.07304		292.411	0.51816	0.48184		292.411	0.56614	0.43386		291.267	0.55103	0.44897
										292.67	0.5414	0.4586		292.663	0.57106	0.42894		292.679	0.63993	0.36007		292.666	0.691	0.309		292.684	0.80453	0.19547		270.718	0.92874	0.07126		270.717	0.92856	0.07144		292.666	0.50781	0.49219		292.667	0.55969	0.44031		291.521	0.55584	0.44416
										292.925	0.51271	0.48729		292.919	0.5727	0.4273		292.935	0.62718	0.37282		292.923	0.69743	0.30257		292.941	0.78421	0.21579		270.956	0.94172	0.05828		270.954	0.92718	0.07282		292.922	0.42822	0.57178		292.923	0.51722	0.48278		291.776	0.57196	0.42804
										293.181	0.52841	0.47159		293.175	0.58308	0.41692		293.191	0.62867	0.37133		293.179	0.68707	0.31293		293.197	0.79419	0.20581		271.192	0.92613	0.07387		271.192	0.92569	0.07431		293.178	0.50328	0.49672		293.179	0.53209	0.46791		292.031	0.5541	0.4459
										293.437	0.51797	0.48203		293.431	0.57719	0.42281		293.446	0.64469	0.35531		293.435	0.69909	0.30091		293.453	0.792	0.208		271.43	0.9224	0.0776		271.428	0.9331	0.0669		293.434	0.5108	0.4892		293.435	0.55553	0.44447		292.287	0.55276	0.44724
										293.693	0.56141	0.43859		293.687	0.57699	0.42301		293.702	0.64455	0.35545		293.691	0.68846	0.31154		293.708	0.79736	0.20264		271.665	0.93611	0.06389		271.665	0.92128	0.07872		293.691	0.522	0.478		293.691	0.48695	0.51305		292.542	0.55205	0.44795
										293.95	0.53628	0.46372		293.943	0.57431	0.42569		293.959	0.65168	0.34832		293.947	0.70335	0.29665		293.964	0.78273	0.21727		271.902	0.94301	0.05699		271.901	0.91029	0.08971		293.946	0.46139	0.53861		293.947	0.52963	0.47037		292.797	0.54759	0.45241
										294.206	0.51047	0.48953		294.199	0.57088	0.42912		294.214	0.65873	0.34127		294.203	0.69525	0.30475		294.221	0.80573	0.19427		272.139	0.9243	0.0757		272.138	0.93507	0.06493		294.203	0.5004	0.4996		294.203	0.51641	0.48359		293.052	0.55156	0.44844
										294.462	0.52691	0.47309		294.455	0.5811	0.4189		294.471	0.86818	0.13182		294.459	0.69272	0.30728		294.476	0.79825	0.20175		272.376	0.92084	0.07916		272.375	0.94229	0.05771		294.459	0.45861	0.54139		294.458	0.53492	0.46508		293.306	0.56101	0.43899
										294.718	0.52366	0.47634		294.711	0.58063	0.41937		294.727	0.66431	0.33569		294.716	0.67565	0.32435		294.733	0.80219	0.19781		272.614	0.93317	0.06683		272.612	0.94023	0.05977		294.714	0.37402	0.62598		294.715	0.52334	0.47666		293.561	0.54839	0.45161
										294.974	0.50953	0.49047		294.967	0.56773	0.43227		294.983	0.65755	0.34245		294.971	0.68902	0.31098		294.989	0.80659	0.19341		272.85	0.92706	0.07294		272.849	0.92703	0.07297		294.971	0.5151	0.4849		294.971	0.53958	0.46042		293.818	0.52663	0.47337
										295.23	0.52486	0.47514		295.223	0.57078	0.42922		295.239	0.65125	0.34875		295.227	0.70136	0.29864		295.245	0.7942	0.2058		273.087	0.93924	0.06076		273.085	0.93443	0.06557		295.227	0.52537	0.47463		295.227	0.53869	0.46131		294.073	0.51712	0.48288
										295.486	0.53371	0.46629		295.479	0.57365	0.42635		295.494	0.6493	0.3507		295.483	0.69888	0.30112		295.502	0.76107	0.23893		273.324	0.91684	0.08316		273.323	0.93941	0.06059		295.482	0.60391	0.39609		295.483	0.5126	0.4874		294.327	0.55295	0.44705
										295.742	0.52861	0.47139		295.736	0.57941	0.42059		295.751	0.6651	0.3349		295.739	0.67926	0.32074		295.757	0.79505	0.20495		273.561	0.92871	0.07129		273.56	0.93105	0.06895		295.739	0.52275	0.47725		295.74	0.54317	0.45683		294.582	0.54946	0.45054
										295.998	0.53529	0.46471		295.991	0.56703	0.43297		296.007	0.64861	0.35139		295.995	0.73563	0.26437		296.014	0.80733	0.19267		273.797	0.92576	0.07424		273.796	0.93228	0.06772		295.995	0.51633	0.48367		295.996	0.54535	0.45465		294.837	0.5515	0.4485
										296.255	0.51662	0.48338		296.248	0.58064	0.41936		296.264	0.50811	0.49189		296.252	0.67643	0.32357		296.27	0.79266	0.20734		274.034	0.93395	0.06605		274.033	0.92182	0.07818		296.25	0.53825	0.46175		296.252	0.50653	0.49347		295.092	0.5517	0.4483
										296.511	0.50606	0.49394		296.504	0.56807	0.43193		296.52	0.47871	0.52129		296.507	0.66395	0.33605		296.525	0.77586	0.22414		274.27	0.93243	0.06757		274.27	0.93603	0.06397		296.507	0.56441	0.43559		296.507	0.52361	0.47639		295.347	0.54597	0.45403
										296.766	0.48901	0.51099		296.759	0.57144	0.42856		296.775	1.01172	-0.01172		296.764	0.6854	0.3146		296.781	0.79709	0.20291		274.508	0.92278	0.07722		274.507	0.92549	0.07451		296.763	0.52126	0.47874		296.764	0.51694	0.48306		295.602	0.55371	0.44629
										297.023	0.51104	0.48896		297.015	0.56891	0.43109		297.032	0.68784	0.31216		297.019	0.6938	0.3062		297.037	0.80263	0.19737		274.745	0.93683	0.06317		274.744	0.9413	0.0587		297.019	0.54828	0.45172		297.019	0.50728	0.49272		295.857	0.5032	0.4968
										297.278	0.53317	0.46683		297.272	0.57104	0.42896		297.288	0.40456	0.59544		297.275	0.68727	0.31273		297.293	0.8064	0.1936		274.982	0.92613	0.07387		274.981	0.92435	0.07565		297.275	0.51016	0.48984		297.275	0.52965	0.47035		296.112	0.55376	0.44624
										297.535	0.51103	0.48897		297.528	0.57872	0.42128		297.544	0.63592	0.36408		297.531	0.69624	0.30376		297.549	0.81218	0.18782		275.219	0.92188	0.07812		275.218	0.92202	0.07798		297.531	0.5278	0.4722		297.531	0.52413	0.47587		296.368	0.56249	0.43751
										297.791	0.53023	0.46977		297.783	0.57823	0.42177		297.799	0.62734	0.37266		297.788	0.69084	0.30916		297.805	0.799	0.201		275.455	0.91834	0.08166		275.454	0.93314	0.06686		297.787	0.52545	0.47455		297.788	0.49317	0.50683		296.622	0.54819	0.45181
										298.046	0.50357	0.49643		298.039	0.56608	0.43392		298.055	0.63725	0.36275		298.044	0.69845	0.30155		298.061	0.78828	0.21172		275.692	0.92328	0.07672		275.691	0.93097	0.06903		298.044	0.5226	0.4774		298.044	0.50674	0.49326		296.877	0.54522	0.45478
										298.303	0.5257	0.4743		298.295	0.57374	0.42626		298.312	0.6419	0.3581		298.3	0.69492	0.30508		298.318	0.8017	0.1983		275.929	0.94462	0.05538		275.927	0.92816	0.07184		298.299	0.57013	0.42987		298.3	0.5302	0.4698		297.132	0.55021	0.44979
										298.558	0.52915	0.47085		298.552	0.56911	0.43089		298.567	0.61925	0.38075		298.555	0.69625	0.30375		298.573	0.80088	0.19912		276.166	0.93371	0.06629		276.165	0.94193	0.05807		298.555	0.51059	0.48941		298.556	0.52649	0.47351		297.388	0.55952	0.44048
										298.815	0.50101	0.49899		298.808	0.57698	0.42302		298.823	0.63757	0.36243		298.813	0.62777	0.37223		298.83	0.80338	0.19662		276.403	0.92525	0.07475		276.402	0.93488	0.06512		298.811	0.51122	0.48878		298.812	0.45477	0.54523		297.642	0.5537	0.4463
										299.071	0.54994	0.45006		299.064	0.56874	0.43126		299.08	0.62805	0.37195		299.068	0.69017	0.30983		299.086	0.79375	0.20625		276.64	0.94987	0.05013		276.638	0.92824	0.07176		299.067	0.51634	0.48366		299.068	0.53205	0.46795		297.898	0.5548	0.4452
										299.327	0.52066	0.47934		299.32	0.56882	0.43118		299.336	0.62959	0.37041		299.324	0.68746	0.31254		299.342	0.80541	0.19459		276.876	0.92	0.08		276.875	0.91531	0.08469		299.324	0	1		299.324	0.52016	0.47984		298.153	0.5549	0.4451
										299.583	0.52508	0.47492		299.576	0.57386	0.42614		299.592	0.60795	0.39205		299.58	0.66565	0.33435		299.597	0.78594	0.21406		277.113	0.93081	0.06919		277.112	0.93756	0.06244		299.58	0.57538	0.42462		299.58	0.55695	0.44305		298.408	0.55387	0.44613
										299.839	0.53897	0.46103		299.832	0.57918	0.42082		299.847	0.64063	0.35937		299.837	0.70147	0.29853		299.854	0.79956	0.20044		277.35	0.92744	0.07256		277.349	0.92057	0.07943		299.836	0.57956	0.42044		299.836	0.45839	0.54161		298.663	0.55448	0.44552
										300.096	0.54299	0.45701		300.089	0.57681	0.42319		300.103	0.6465	0.3535		300.092	0.69662	0.30338		300.11	0.7906	0.2094		277.588	0.92908	0.07092		277.587	0.92637	0.07363		300.091	0.51773	0.48227		300.092	0.50376	0.49624		298.918	0.55702	0.44298
										300.352	0.5122	0.4878		300.344	0.57383	0.42617		300.36	0.63455	0.36545		300.348	0.6921	0.3079		300.366	0.79397	0.20603		277.823	0.92033	0.07967		277.823	0.93862	0.06138		300.348	0.51244	0.48756		300.348	0.45449	0.54551		299.173	0.55563	0.44437
										300.607	0.51617	0.48383		300.6	0.57409	0.42591		300.616	0.63154	0.36846		300.605	0.64747	0.35253		300.622	0.80714	0.19286		278.061	0.93681	0.06319		278.06	0.92836	0.07164		300.604	0.48329	0.51671		300.604	0.51528	0.48472		299.428	0.55426	0.44574
										300.863	0.52052	0.47948		300.856	0.56564	0.43436		300.872	0.82052	0.17948		300.86	0.69531	0.30469		300.878	0.78702	0.21298		278.298	0.92201	0.07799		278.296	0.93146	0.06854		300.86	0.47732	0.52268		300.861	0.53594	0.46406		299.683	0.5571	0.4429
										301.12	0.49506	0.50494		301.112	0.5701	0.4299		301.128	0.63635	0.36365		301.116	0.66098	0.33902		301.134	0.7929	0.2071		278.535	0.92121	0.07879		278.534	0.93114	0.06886		301.116	0.5169	0.4831		301.117	0.52212	0.47788		299.938	0.55533	0.44467
										301.375	0.54752	0.45248		301.368	0.57219	0.42781		301.384	0.63367	0.36633		301.372	0.67499	0.32501		301.39	0.78941	0.21059		278.771	0.92187	0.07813		278.771	0.92178	0.07822		301.372	0.53824	0.46176		301.372	0.51546	0.48454		300.193	0.54476	0.45524
										301.633	0.52944	0.47056		301.624	0.56614	0.43386		301.64	0.64561	0.35439		301.629	0.70081	0.29919		301.647	0.79615	0.20385		279.008	0.92895	0.07105		279.008	0.92855	0.07145		301.628	0.51022	0.48978		301.628	0.53398	0.46602		300.448	0.55094	0.44906
										301.888	0.52667	0.47333		301.881	0.57519	0.42481		301.896	0.61526	0.38474		301.885	0.6954	0.3046		301.903	0.80221	0.19779		279.245	0.92239	0.07761		279.244	0.91505	0.08495		301.883	0.4436	0.5564		301.884	0.5343	0.4657		300.703	0.55655	0.44345
										302.145	0.53352	0.46648		302.136	0.56605	0.43395		302.153	0.63044	0.36956		302.141	0.70587	0.29413		302.158	0.78938	0.21062		279.482	0.91929	0.08071		279.481	0.92328	0.07672		302.14	0.47846	0.52154		302.141	0.52047	0.47953		300.958	0.5541	0.4459
										302.401	0.51049	0.48951		302.393	0.58101	0.41899		302.408	0.63566	0.36434		302.396	0.69018	0.30982		302.414	0.79629	0.20371		279.718	0.92785	0.07215		279.717	0.93097	0.06903		302.396	0.50999	0.49001		302.396	0.51964	0.48036		301.214	0.54878	0.45122
										302.656	0.51185	0.48815		302.649	0.57172	0.42828		302.664	0.63796	0.36204		302.652	0.69346	0.30654		302.67	0.79773	0.20227		279.955	0.93256	0.06744		279.954	0.92313	0.07687		302.652	0.72551	0.27449		302.653	0.49438	0.50562		301.468	0.55223	0.44777
										302.912	0.52199	0.47801		302.904	0.56617	0.43383		302.921	0.7622	0.2378		302.909	0.69503	0.30497		302.927	0.78319	0.21681		280.191	0.93351	0.06649		280.191	0.9195	0.0805		302.908	0.51449	0.48551		302.909	0.54647	0.45353		301.724	0.5558	0.4442
										303.169	0.51059	0.48941		303.161	0.56664	0.43336		303.176	0.63337	0.36663		303.164	0.69091	0.30909		303.182	0.79306	0.20694		280.429	0.92935	0.07065		280.428	0.93204	0.06796		303.164	0.52047	0.47953		303.165	0.49556	0.50444		301.979	0.48193	0.51807
										303.425	0.53152	0.46848		303.417	0.57627	0.42373		303.432	0.62914	0.37086		303.421	0.68874	0.31126		303.439	0.77414	0.22586		280.667	0.92635	0.07365		280.665	0.92969	0.07031		303.42	0.52015	0.47985		303.421	0.51849	0.48151		302.234	0.5665	0.4335
										303.681	0.48823	0.51177		303.673	0.57047	0.42953		303.689	0.61777	0.38223		303.676	0.68616	0.31384		303.695	0.797	0.203		280.903	0.934	0.066		280.902	0.91832	0.08168		303.677	0.51378	0.48622		303.676	0.52098	0.47902		302.489	0.55508	0.44492
										303.936	0.50489	0.49511		303.928	0.57134	0.42866		303.945	0.63772	0.36228		303.932	0.68941	0.31059		303.951	0.79391	0.20609		281.139	0.93439	0.06561		281.137	0.93236	0.06764		303.932	0.70261	0.29739		303.933	0.52819	0.47181		302.743	0.54493	0.45507
										304.193	0.53603	0.46397		304.184	0.56994	0.43006		304.201	0.63089	0.36911		304.189	0.62276	0.37724		304.207	0.78895	0.21105		281.376	0.91411	0.08589		281.375	0.93363	0.06637		304.189	0.51587	0.48413		304.189	0.52993	0.47007		302.998	0.54561	0.45439
										304.449	0.52925	0.47075		304.441	0.56886	0.43114		304.457	0.61476	0.38524		304.445	0.68843	0.31157		304.463	0.79361	0.20639		281.613	0.92513	0.07487		281.612	0.9226	0.0774		304.445	0.42763	0.57237		304.444	0.50399	0.49601		303.253	0.55129	0.44871
										304.704	0.54205	0.45795		304.697	0.56783	0.43217		304.712	0.63439	0.36561		304.702	0.68544	0.31456		304.719	0.78333	0.21667		281.851	0.92733	0.07267		281.849	0.92638	0.07362		304.7	0.50346	0.49654		304.7	0.519	0.481		303.508	0.55042	0.44958
										304.961	0.52607	0.47393		304.953	0.57362	0.42638		304.968	0.62618	0.37382		304.957	0.6935	0.3065		304.974	0.78733	0.21267		282.087	0.91969	0.08031		282.087	0.91635	0.08365		304.957	0.52076	0.47924		304.957	0.51667	0.48333		303.764	0.55135	0.44865
										305.217	0.46066	0.53934		305.21	0.56489	0.43511		305.224	0.63473	0.36527		305.213	0.68396	0.31604		305.23	0.7932	0.2068		282.323	0.93367	0.06633		282.323	0.92852	0.07148		305.213	0.50253	0.49747		305.213	0.51781	0.48219		304.019	0.56027	0.43973
										305.474	0.50922	0.49078		305.465	0.56792	0.43208		305.481	0.62829	0.37171		305.469	0.62688	0.37312		305.487	0.7996	0.2004		282.56	0.92018	0.07982		282.559	0.92828	0.07172		305.469	0.60219	0.39781		305.469	0.46242	0.53758		304.275	0.55162	0.44838
										305.729	0.51995	0.48005		305.721	0.57001	0.42999		305.737	0.6305	0.3695		305.726	0.68697	0.31303		305.743	0.7796	0.2204		282.797	0.92137	0.07863		282.796	0.93222	0.06778		305.725	0.50446	0.49554		305.725	0.53663	0.46337		304.529	0.55995	0.44005
										305.985	0.50938	0.49062		305.978	0.56844	0.43156		305.993	0.54466	0.45534		305.981	0.70264	0.29736		305.999	0.79331	0.20669		283.034	0.91729	0.08271		283.033	0.92482	0.07518		305.981	0.55768	0.44232		305.981	0.47797	0.52203		304.784	0.55791	0.44209
										306.241	0.50887	0.49113		306.233	0.57416	0.42584		306.249	0.62869	0.37131		306.237	0.68557	0.31443		306.255	0.80259	0.19741		283.271	0.93673	0.06327		283.271	0.91895	0.08105		306.237	0.6098	0.3902		306.237	0.52114	0.47886		305.039	0.48507	0.51493
										306.497	0.52682	0.47318		306.489	0.56151	0.43849		306.506	0.63641	0.36359		306.493	0.65083	0.34917		306.512	0.79811	0.20189		283.507	0.92652	0.07348		283.507	0.93325	0.06675		306.492	0.51314	0.48686		306.493	0.54072	0.45928		305.294	0.5498	0.4502
										306.753	0.50583	0.49417		306.745	0.56431	0.43569		306.761	0.61529	0.38471		306.749	0.6875	0.3125		306.767	0.79151	0.20849		283.744	0.93029	0.06971		283.743	0.92037	0.07963		306.749	0.42236	0.57764		306.75	0.51833	0.48167		305.549	0.5459	0.4541
										307.01	0.51627	0.48373		307.001	0.57196	0.42804		307.017	0.62661	0.37339		307.006	0.6754	0.3246		307.023	0.78741	0.21259		283.981	0.92163	0.07837		283.98	0.92158	0.07842		307.005	0.29449	0.70551		307.005	0.52592	0.47408		305.804	0.54337	0.45663
										307.266	0.48088	0.51912		307.257	0.56618	0.43382		307.273	0.62029	0.37971		307.261	0.71195	0.28805		307.28	0.7948	0.2052		284.219	0.91882	0.08118		284.218	0.91734	0.08266		307.261	0.54641	0.45359		307.262	0.51344	0.48656		306.059	0.56011	0.43989
										307.521	0.52352	0.47648		307.514	0.58463	0.41537		307.529	0.62363	0.37637		307.517	0.68989	0.31011		307.535	0.80627	0.19373		284.455	0.92634	0.07366		284.455	0.92337	0.07663		307.516	0.50236	0.49764		307.518	0.501	0.499		306.314	0.5432	0.4568
										307.778	0.51219	0.48781		307.769	0.56909	0.43091		307.785	0.62613	0.37387		307.773	0.68345	0.31655		307.792	0.79425	0.20575		284.692	0.91713	0.08287		284.691	0.92867	0.07133		307.773	0.51043	0.48957		307.774	0.51298	0.48702		306.57	0.54381	0.45619
										308.034	0.51736	0.48264		308.026	0.56397	0.43603		308.041	0.63749	0.36251		308.029	0.68651	0.31349		308.048	0.80111	0.19889		284.929	0.9277	0.0723		284.928	0.93032	0.06968		308.03	0.50478	0.49522		308.03	0.53175	0.46825		306.824	0.54545	0.45455
										308.29	0.52094	0.47906		308.282	0.56812	0.43188		308.297	0.70052	0.29948		308.285	0.6936	0.3064		308.304	0.78659	0.21341		285.166	0.91407	0.08593		285.164	0.91036	0.08964		308.285	0.50577	0.49423		308.285	0.49967	0.50033		307.079	0.53989	0.46011
										308.546	0.51881	0.48119		308.538	0.57604	0.42396		308.554	0.64949	0.35051		308.542	0.68295	0.31705		308.56	0.79441	0.20559		285.402	0.91414	0.08586		285.402	0.93256	0.06744		308.541	0.51199	0.48801		308.541	0.52779	0.47221		307.334	0.54495	0.45505
										308.802	0.5136	0.4864		308.794	0.56382	0.43618		308.809	0.62751	0.37249		308.798	0.69415	0.30585		308.816	0.80878	0.19122		285.64	0.92392	0.07608		285.639	0.92899	0.07101		308.797	0.51391	0.48609		308.797	0.52227	0.47773		307.589	0.54973	0.45027
										309.057	0.5317	0.4683		309.05	0.55958	0.44042		309.066	0.62147	0.37853		309.054	0.68724	0.31276		309.071	0.79026	0.20974		285.877	0.94175	0.05825		285.875	0.91897	0.08103		309.053	0.54366	0.45634		309.054	0.52716	0.47284		307.845	0.54459	0.45541
										309.313	0.52435	0.47565		309.307	0.56544	0.43456		309.321	0.63329	0.36671		309.31	0.69837	0.30163		309.328	0.79089	0.20911		286.112	0.93678	0.06322		286.112	0.94389	0.05611		309.309	0.51825	0.48175		309.31	0.51452	0.48548		308.099	0.54579	0.45421
										309.571	0.51698	0.48302		309.563	0.56315	0.43685		309.577	0.63237	0.36763		309.566	0.6802	0.3198		309.584	0.80341	0.19659		286.35	0.92347	0.07653		286.349	0.92201	0.07799		309.566	1.01172	-0.01172		309.566	0.51885	0.48115		308.354	0.54386	0.45614
										309.826	0.51947	0.48053		309.818	0.56602	0.43398		309.833	0.62479	0.37521		309.822	0.66192	0.33808		309.839	0.79809	0.20191		286.587	0.91518	0.08482		286.586	0.92119	0.07881		309.821	0.57856	0.42144		309.823	0.51226	0.48774		308.609	0.55342	0.44658
										310.082	0.55396	0.44604		310.075	0.57293	0.42707		310.09	0.61575	0.38425		310.078	0.68974	0.31026		310.095	0.78395	0.21605		286.824	0.92726	0.07274		286.822	0.94379	0.05621		310.077	0.52187	0.47813		310.078	0.51624	0.48376		308.864	0.54137	0.45863
										310.338	0.50816	0.49184		310.331	0.56154	0.43846		310.345	0.6207	0.3793		310.334	0.66981	0.33019		310.352	0.78356	0.21644		287.06	0.93443	0.06557		287.06	0.92922	0.07078		310.334	0.53775	0.46225		310.334	0.56129	0.43871		309.121	0.54838	0.45162
										310.594	0.5223	0.4777		310.587	0.56532	0.43468		310.602	0.62984	0.37016		310.59	0.69678	0.30322		310.607	0.80337	0.19663		287.298	0.93362	0.06638		287.296	0.92517	0.07483		310.59	0.59252	0.40748		310.59	0.50092	0.49908		309.375	0.57243	0.42757
										310.851	0.51669	0.48331		310.843	0.56701	0.43299		310.857	0.59921	0.40079		310.846	0.69274	0.30726		310.864	0.79133	0.20867		287.534	0.92793	0.07207		287.532	0.92469	0.07531		310.845	0.54584	0.45416		310.846	0.49976	0.50024		309.629	0.54996	0.45004
										311.106	0.48789	0.51211		311.099	0.56498	0.43502		311.114	0.61592	0.38408		311.103	0.68595	0.31405		311.119	0.79922	0.20078		287.771	0.92334	0.07666		287.77	0.92314	0.07686		311.102	0.5123	0.4877		311.102	0.54511	0.45489		309.885	0.54656	0.45344
										311.362	0.50063	0.49937		311.356	0.56024	0.43976		311.37	0.62289	0.37711		311.358	0.67557	0.32443		311.377	0.77888	0.22112		288.009	0.92442	0.07558		288.006	0.91444	0.08556		311.358	0.53385	0.46615		311.358	0.51308	0.48692		310.14	0.54453	0.45547
										311.618	0.4901	0.5099		311.612	0.57721	0.42279		311.627	0.63763	0.36237		311.614	0.48402	0.51598		311.633	0.80479	0.19521		288.244	0.92826	0.07174		288.244	0.92742	0.07258		311.613	0.52763	0.47237		311.614	0.49436	0.50564		310.394	0.55012	0.44988
										311.875	0.53035	0.46965		311.867	0.56952	0.43048		311.882	0.62736	0.37264		311.871	0.66123	0.33877		311.888	0.79548	0.20452		288.481	0.92989	0.07011		288.481	0.91392	0.08608		311.869	0.52631	0.47369		311.87	0.49567	0.50433		310.65	0.55163	0.44837
										312.131	0.52522	0.47478		312.124	0.55703	0.44297		312.138	0.62577	0.37423		312.127	0.67772	0.32228		312.144	0.80615	0.19385		288.718	0.92494	0.07506		288.718	0.9197	0.0803		312.125	0.52874	0.47126		312.126	0.50936	0.49064		310.905	0.55486	0.44514
										312.386	0.50324	0.49676		312.379	0.57756	0.42244		312.394	0.63229	0.36771		312.382	0.68105	0.31895		312.401	0.78324	0.21676		288.955	0.92743	0.07257		288.954	0.91977	0.08023		312.382	0.50573	0.49427		312.383	0.52577	0.47423		311.16	0.551	0.449
										312.642	0.52232	0.47768		312.635	0.55874	0.44126		312.65	0.62059	0.37941		312.639	0.68823	0.31177		312.656	0.80911	0.19089		289.192	0.91497	0.08503		289.192	0.9311	0.0689		312.638	0.4393	0.5607		312.638	0.51433	0.48567		311.416	0.54468	0.45532
										312.898	0.49973	0.50027		312.891	0.56438	0.43562		312.906	1.01172	-0.01172		312.894	0.69744	0.30256		312.912	0.80196	0.19804		289.428	0.9139	0.0861		289.429	0.92518	0.07482		312.894	0.53454	0.46546		312.895	0.51385	0.48615		311.67	0.54841	0.45159
										313.154	0.52698	0.47302		313.148	0.56574	0.43426		313.162	0.61454	0.38546		313.151	0.69333	0.30667		313.169	0.78556	0.21444		289.665	0.9375	0.0625		289.665	0.92227	0.07773		313.15	0.45752	0.54248		313.151	0.56507	0.43493		311.925	0.5536	0.4464
										313.41	0.51459	0.48541		313.404	0.56054	0.43946		313.418	0.62304	0.37696		313.407	0.68352	0.31648		313.424	0.78326	0.21674		289.903	0.92439	0.07561		289.901	0.93246	0.06754		313.406	0.47337	0.52663		313.406	0.53767	0.46233		312.18	0.5427	0.4573
										313.667	0.50771	0.49229		313.659	0.56042	0.43958		313.674	0.62529	0.37471		313.663	0.72706	0.27294		313.68	0.80342	0.19658		290.14	0.93928	0.06072		290.139	0.92164	0.07836		313.662	0.4292	0.5708		313.663	0.51257	0.48743		312.435	0.5552	0.4448
										313.922	0.48532	0.51468		313.916	0.56528	0.43472		313.931	0.66132	0.33868		313.92	0.78488	0.21512		313.936	0.79009	0.20991		290.375	0.93894	0.06106		290.375	0.91495	0.08505		313.918	0.50204	0.49796		313.918	0.52995	0.47005		312.691	0.55168	0.44832
										314.179	0.53285	0.46715		314.172	0.55948	0.44052		314.187	0.61543	0.38457		314.175	0.68013	0.31987		314.193	0.79581	0.20419		290.613	0.92505	0.07495		290.613	0.92674	0.07326		314.174	0.52309	0.47691		314.174	0.53141	0.46859		312.945	0.63495	0.36505
										314.435	0.52173	0.47827		314.428	0.56832	0.43168		314.442	1.01172	-0.01172		314.431	0.68469	0.31531		314.449	0.786	0.214		290.85	0.92702	0.07298		290.849	0.93151	0.06849		314.431	0.55481	0.44519		314.431	0.50179	0.49821		313.2	0.54822	0.45178
										314.691	0.48494	0.51506		314.684	0.5663	0.4337		314.699	0.61689	0.38311		314.687	0.75279	0.24721		314.705	0.80525	0.19475		291.087	0.90415	0.09585		291.086	0.92424	0.07576		314.686	0.51818	0.48182		314.687	0.51411	0.48589		313.456	0.55334	0.44666
										314.947	0.49346	0.50654		314.94	0.55354	0.44646		314.955	0.60032	0.39968		314.944	0.68084	0.31916		314.961	0.78817	0.21183		291.324	0.92637	0.07363		291.322	0.9305	0.0695		314.942	0.51695	0.48305		314.943	0.49448	0.50552		313.711	0.54775	0.45225
										315.203	0.53755	0.46245		315.197	0.56445	0.43555		315.211	0.39318	0.60682		315.2	0.68732	0.31268		315.216	0.78756	0.21244		291.56	0.93379	0.06621		291.56	0.91942	0.08058		315.199	0.5649	0.4351		315.199	0.48497	0.51503		313.965	0.55718	0.44282
										315.459	0.51732	0.48268		315.452	0.56465	0.43535		315.467	0.63718	0.36282		315.455	0.67945	0.32055		315.472	0.79589	0.20411		291.797	0.92422	0.07578		291.797	0.91829	0.08171		315.454	0.50917	0.49083		315.455	0.55632	0.44368		314.22	0.54831	0.45169
										315.715	0.48677	0.51323		315.708	0.58209	0.41791		315.723	0.61038	0.38962		315.711	0.70161	0.29839		315.728	0.79861	0.20139		292.034	0.93163	0.06837		292.033	0.92904	0.07096		315.711	0.50275	0.49725		315.711	0.53731	0.46269		314.477	0.54868	0.45132
										315.971	0.51821	0.48179		315.964	0.56018	0.43982		315.978	0.62017	0.37983		315.967	0.67378	0.32622		315.985	0.789	0.211		292.271	0.92135	0.07865		292.27	0.92761	0.07239		315.967	0.51278	0.48722		315.967	0.5275	0.4725		314.731	0.54789	0.45211
										316.227	0.53871	0.46129		316.22	0.56392	0.43608		316.234	0.62842	0.37158		316.223	0.67271	0.32729		316.241	0.78442	0.21558		292.508	0.92348	0.07652		292.507	0.91906	0.08094		316.223	0	1		316.223	0.48932	0.51068		314.985	0.55202	0.44798
										316.484	0.51886	0.48114		316.476	0.55892	0.44108		316.491	0.62727	0.37273		316.479	0.6926	0.3074		316.497	0.78905	0.21095		292.745	0.91646	0.08354		292.743	0.92005	0.07995		316.479	0.51039	0.48961		316.479	0.53142	0.46858		315.241	0.53841	0.46159
										316.739	0.51149	0.48851		316.733	0.56236	0.43764		316.747	0.62385	0.37615		316.735	0.74736	0.25264		316.753	0.80045	0.19955		292.981	0.93619	0.06381		292.98	0.92833	0.07167		316.735	0.52352	0.47648		316.735	0.50829	0.49171		315.495	0.5456	0.4544
										316.996	0.53934	0.46066		316.988	0.56804	0.43196		317.003	0.61889	0.38111		316.991	0.67579	0.32421		317.009	0.79646	0.20354		293.218	0.92797	0.07203		293.216	0.92353	0.07647		316.991	0.47281	0.52719		316.991	0.5312	0.4688		315.751	0.53459	0.46541
										317.251	0.5209	0.4791		317.244	0.55241	0.44759		317.259	0.63284	0.36716		317.247	0.80149	0.19851		317.266	0.79789	0.20211		293.455	0.93239	0.06761		293.454	0.9185	0.0815		317.247	0.37523	0.62477		317.247	0.51526	0.48474		316.007	0.5403	0.4597
										317.508	0.50719	0.49281		317.501	0.56336	0.43664		317.515	0.50516	0.49484		317.504	0.61688	0.38312		317.521	0.77577	0.22423		293.692	0.93492	0.06508		293.691	0.92471	0.07529		317.503	0.51433	0.48567		317.503	0.51517	0.48483		316.262	0.54754	0.45246
										317.763	0.49467	0.50533		317.756	0.56852	0.43148		317.771	0.64335	0.35665		317.759	0.67364	0.32636		317.777	0.78206	0.21794		293.929	0.92516	0.07484		293.929	0.93136	0.06864		317.759	0.52225	0.47775		317.76	0.54882	0.45118		316.517	0.54332	0.45668
										318.02	0.50827	0.49173		318.013	0.56608	0.43392		318.027	0.61961	0.38039		318.015	0.69398	0.30602		318.034	0.79097	0.20903		294.166	0.91203	0.08797		294.165	0.92713	0.07287		318.015	0.53324	0.46676		318.015	0.53444	0.46556		316.771	0.56756	0.43244
										318.276	0.51365	0.48635		318.268	0.57003	0.42997		318.283	0.6309	0.3691		318.271	0.68202	0.31798		318.289	0.78583	0.21417		294.403	0.92412	0.07588		294.401	0.91913	0.08087		318.271	0.5219	0.4781		318.272	0.50279	0.49721		317.026	0.5421	0.4579
										318.532	0.51722	0.48278		318.524	0.56797	0.43203		318.539	0.62347	0.37653		318.527	0.6725	0.3275		318.546	0.79024	0.20976		294.64	0.92369	0.07631		294.638	0.91919	0.08081		318.528	0.51191	0.48809		318.527	0.51043	0.48957		317.281	0.54547	0.45453
										318.787	0.50158	0.49842		318.781	0.55989	0.44011		318.795	0.63964	0.36036		318.784	0.69415	0.30585		318.801	0.79024	0.20976		294.877	0.93457	0.06543		294.875	0.91774	0.08226		318.783	0.52067	0.47933		318.784	0.50704	0.49296		317.537	0.54622	0.45378
										319.043	0.5063	0.4937		319.036	0.56857	0.43143		319.051	0.61023	0.38977		319.04	0.69174	0.30826		319.058	0.79624	0.20376		295.114	0.92859	0.07141		295.112	0.91779	0.08221		319.039	0.49635	0.50365		319.039	0.4879	0.5121		317.792	0.5455	0.4545
										319.3	0.49884	0.50116		319.293	0.55868	0.44132		319.308	0.65404	0.34596		319.296	0.67292	0.32708		319.313	0.79361	0.20639		295.349	0.9229	0.0771		295.35	0.92291	0.07709		319.296	0.51417	0.48583		319.295	0.51856	0.48144		318.046	0.56129	0.43871
										319.556	0.51558	0.48442		319.548	0.56107	0.43893		319.563	0.63087	0.36913		319.551	0.67925	0.32075		319.57	0.78882	0.21118		295.586	0.93069	0.06931		295.587	0.92854	0.07146		319.552	0.53243	0.46757		319.552	0.5039	0.4961		318.302	0.54697	0.45303
										319.812	0.53081	0.46919		319.805	0.55921	0.44079		319.82	0.62071	0.37929		319.808	0.65705	0.34295		319.827	0.78467	0.21533		295.824	0.92428	0.07572		295.823	0.91646	0.08354		319.807	0.59353	0.40647		319.807	0.49602	0.50398		318.556	0.55776	0.44224
										320.068	0.52606	0.47394		320.061	0.56303	0.43697		320.075	0.62899	0.37101		320.064	0.65797	0.34203		320.082	0.77196	0.22804		296.061	0.93695	0.06305		296.059	0.93129	0.06871		320.064	0.51086	0.48914		320.064	0.52473	0.47527		318.812	0.53847	0.46153
										320.324	0.5063	0.4937		320.317	0.56186	0.43814		320.332	0.63489	0.36511		320.32	0.70582	0.29418		320.338	0.78487	0.21513		296.297	0.92034	0.07966		296.297	0.93751	0.06249		320.319	0.50786	0.49214		320.32	0.52943	0.47057		319.067	0.559	0.441
										320.58	0.55745	0.44255		320.573	0.56005	0.43995		320.587	0.63068	0.36932		320.576	0.65749	0.34251		320.595	0.80338	0.19662		296.533	0.9172	0.0828		296.533	0.93856	0.06144		320.575	0.37479	0.62521		320.576	0.53645	0.46355		319.322	0.5474	0.4526
										320.837	0.50532	0.49468		320.83	0.56197	0.43803		320.843	0.8049	0.1951		320.832	0.67715	0.32285		320.851	0.79218	0.20782		296.771	0.92136	0.07864		296.769	0.926	0.074		320.832	0.5022	0.4978		320.831	0.52295	0.47705		319.577	0.54919	0.45081
										321.092	0.50919	0.49081		321.085	0.55985	0.44015		321.1	0.62027	0.37973		321.088	0.66539	0.33461		321.107	0.7944	0.2056		297.008	0.93119	0.06881		297.007	0.91842	0.08158		321.087	0.52263	0.47737		321.088	0.51998	0.48002		319.833	0.51293	0.48707
										321.348	0.53983	0.46017		321.341	0.56548	0.43452		321.355	0.60253	0.39747		321.345	0.67726	0.32274		321.362	0.77058	0.22942		297.245	0.93326	0.06674		297.244	0.92752	0.07248		321.343	0.50916	0.49084		321.344	0.53632	0.46368		320.087	0.55039	0.44961
										321.605	0.53529	0.46471		321.597	0.55813	0.44187		321.612	0.63978	0.36022		321.601	0.66963	0.33037		321.618	0.79151	0.20849		297.481	0.91533	0.08467		297.481	0.91665	0.08335		321.599	0.51299	0.48701		321.6	0.53767	0.46233		320.342	0.56358	0.43642
										321.86	0.50628	0.49372		321.853	0.55842	0.44158		321.867	0.60109	0.39891		321.856	0.68056	0.31944		321.875	0.79408	0.20592		297.718	0.9148	0.0852		297.718	0.92018	0.07982		321.856	0.51325	0.48675		321.856	0.50498	0.49502		320.596	0.56116	0.43884
										322.116	0.49566	0.50434		322.109	0.56415	0.43585		322.123	0.63585	0.36415		322.112	0.67641	0.32359		322.131	0.78138	0.21862		297.955	0.92509	0.07491		297.954	0.90739	0.09261		322.112	0.55413	0.44587		322.112	0.50907	0.49093		320.852	0.53112	0.46888
										322.372	0.54858	0.45142		322.365	0.57345	0.42655		322.38	0.62795	0.37205		322.368	0.71787	0.28213		322.387	0.79402	0.20598		298.192	0.92875	0.07125		298.19	0.9299	0.0701		322.368	0.50514	0.49486		322.368	0.49367	0.50633		321.107	0.5552	0.4448
										322.628	0.51488	0.48512		322.622	0.56547	0.43453		322.636	0.62842	0.37158		322.624	0.66272	0.33728		322.644	0.79266	0.20734		298.43	0.92846	0.07154		298.428	0.9238	0.0762		322.624	0.37356	0.62644		322.624	0.51766	0.48234		321.362	0.54785	0.45215
										322.884	0.49668	0.50332		322.877	0.56703	0.43297		322.892	0.625	0.375		322.881	0.66167	0.33833		322.899	0.79713	0.20287		298.666	0.91591	0.08409		298.665	0.92179	0.07821		322.881	0.52263	0.47737		322.881	0.48892	0.51108		321.617	0.53768	0.46232
										323.14	0.50478	0.49522		323.134	0.56155	0.43845		323.148	0.62824	0.37176		323.137	0.68555	0.31445		323.155	0.7847	0.2153		298.903	0.93161	0.06839		298.903	0.92081	0.07919		323.136	0.50747	0.49253		323.136	0.53386	0.46614		321.872	0.54941	0.45059
										323.397	0.50267	0.49733		323.39	0.56359	0.43641		323.404	0.62427	0.37573		323.393	0.70416	0.29584		323.411	0.78566	0.21434		299.14	0.9299	0.0701		299.138	0.9149	0.0851		323.392	0.51563	0.48437		323.392	0.50795	0.49205		322.127	0.54132	0.45868
										323.652	0.52243	0.47757		323.646	0.55985	0.44015		323.66	0.62107	0.37893		323.649	0.67505	0.32495		323.667	0.79749	0.20251		299.376	0.94515	0.05485		299.375	0.9212	0.0788		323.648	0.51998	0.48002		323.648	0.50118	0.49882		322.383	0.5122	0.4878
										323.908	0.50982	0.49018		323.902	0.56394	0.43606		323.916	0.50076	0.49924		323.905	0.70268	0.29732		323.923	0.77653	0.22347		299.613	0.92119	0.07881		299.613	0.91198	0.08802		323.904	0.51558	0.48442		323.905	0.49395	0.50605		322.637	0.54556	0.45444
										324.165	0.48735	0.51265		324.158	0.56238	0.43762		324.172	0.6333	0.3667		324.16	0.57115	0.42885		324.179	0.80162	0.19838		299.85	0.92814	0.07186		299.849	0.92403	0.07597		324.16	0.50538	0.49462		324.161	0.52009	0.47991		322.893	0.54652	0.45348
										324.42	0.4938	0.5062		324.414	0.56583	0.43417		324.428	0.63038	0.36962		324.417	0.67296	0.32704		324.435	0.78387	0.21613		300.086	0.92946	0.07054		300.087	0.92661	0.07339		324.417	0.49642	0.50358		324.416	0.50478	0.49522		323.148	0.54381	0.45619
										324.676	0.49707	0.50293		324.669	0.57137	0.42863		324.685	1.01172	-0.01172		324.673	0.69351	0.30649		324.692	0.79995	0.20005		300.323	0.92154	0.07846		300.323	0.89862	0.10138		324.672	0.53124	0.46876		324.673	0.50217	0.49783		323.403	0.5501	0.4499
										324.933	0.50063	0.49937		324.925	0.57523	0.42477		324.94	0.61713	0.38287		324.929	0.68032	0.31968		324.947	0.77625	0.22375		300.56	0.91404	0.08596		300.559	0.917	0.083		324.929	0.48983	0.51017		324.929	0.51691	0.48309		323.657	0.54135	0.45865
										325.189	0.51288	0.48712		325.182	0.57599	0.42401		325.197	0.62003	0.37997		325.184	0.67986	0.32014		325.204	0.78528	0.21472		300.798	0.91575	0.08425		300.797	0.9389	0.0611		325.184	0.51141	0.48859		325.185	0.52089	0.47911		323.913	0.53835	0.46165
										325.444	0.51779	0.48221		325.438	0.56596	0.43404		325.452	0.63242	0.36758		325.441	0.68108	0.31892		325.459	0.79505	0.20495		301.035	0.92957	0.07043		301.033	0.93228	0.06772		325.44	0.52266	0.47734		325.441	0.50529	0.49471		324.168	0.5424	0.4576
										325.701	0.5235	0.4765		325.693	0.57888	0.42112		325.708	0.63107	0.36893		325.697	0.66299	0.33701		325.716	0.78377	0.21623		301.271	0.91355	0.08645		301.271	0.92875	0.07125		325.696	0.49951	0.50049		325.697	0.51311	0.48689		324.423	0.53947	0.46053
										325.956	0.51312	0.48688		325.95	0.55862	0.44138		325.965	0.62658	0.37342		325.953	0.79511	0.20489		325.972	0.79504	0.20496		301.508	0.92271	0.07729		301.507	0.93232	0.06768		325.953	0.49892	0.50108		325.953	0.50672	0.49328		324.677	0.54783	0.45217
										326.213	0.51331	0.48669		326.206	0.56438	0.43562		326.221	0.57902	0.42098		326.209	0.67057	0.32943		326.228	0.78994	0.21006		301.744	0.93434	0.06566		301.743	0.91767	0.08233		326.209	0.26386	0.73614		326.208	0.52756	0.47244		324.933	0.54487	0.45513
										326.469	0.53304	0.46696		326.462	0.55904	0.44096		326.477	0.6179	0.3821		326.465	0.69199	0.30801		326.483	0.7793	0.2207		301.982	0.92528	0.07472		301.98	0.91116	0.08884		326.465	0.51888	0.48112		326.465	0.49683	0.50317		325.188	0.54673	0.45327
										326.726	0.50509	0.49491		326.718	0.56245	0.43755		326.733	0.62155	0.37845		326.721	0.72073	0.27927		326.74	0.78043	0.21957		302.218	0.92856	0.07144		302.218	0.9215	0.0785		326.72	0.50328	0.49672		326.722	0.54807	0.45193		325.442	0.54621	0.45379
										326.981	0.52106	0.47894		326.975	0.55998	0.44002		326.989	0.62752	0.37248		326.977	0.65513	0.34487		326.996	0.80231	0.19769		302.455	0.91381	0.08619		302.455	0.92306	0.07694		326.976	0.40934	0.59066		326.978	0.50085	0.49915		325.698	0.55032	0.44968
										327.237	0.49699	0.50301		327.231	0.55723	0.44277		327.245	0.61661	0.38339		327.233	0.68005	0.31995		327.252	0.78303	0.21697		302.693	0.9307	0.0693		302.69	0.92475	0.07525		327.232	0.50905	0.49095		327.235	0.52662	0.47338		325.953	0.55313	0.44687
										327.493	0.53894	0.46106		327.486	0.558	0.442		327.5	0.63375	0.36625		327.49	0.68937	0.31063		327.508	0.78177	0.21823		302.929	0.92158	0.07842		302.927	0.91648	0.08352		327.488	0.51156	0.48844		327.49	0.50383	0.49617		326.207	0.54237	0.45763
										327.749	0.52243	0.47757		327.742	0.56383	0.43617		327.757	0.74766	0.25234		327.746	0.67979	0.32021		327.764	0.78344	0.21656		303.166	0.93703	0.06297		303.165	0.93396	0.06604		327.745	0.51775	0.48225		327.746	0.53582	0.46418		326.463	0.6134	0.3866
										328.006	0.5284	0.4716		327.998	0.56025	0.43975		328.013	0.62449	0.37551		328.002	0.66796	0.33204		328.02	0.78574	0.21426		303.403	0.91959	0.08041		303.402	0.92354	0.07646		328	0.61528	0.38472		328.002	0.52062	0.47938		326.719	0.54968	0.45032
										328.262	0.47094	0.52906		328.254	0.55336	0.44664		328.269	0.62221	0.37779		328.258	0.67967	0.32033		328.276	0.77913	0.22087		303.64	0.93055	0.06945		303.639	0.92875	0.07125		328.257	0.48811	0.51189		328.258	0.51332	0.48668		326.974	0.54639	0.45361
										328.518	0.51014	0.48986		328.51	0.55651	0.44349		328.525	0.62095	0.37905		328.513	0.65627	0.34373		328.533	0.77901	0.22099		303.876	0.92195	0.07805		303.875	0.91523	0.08477		328.513	0.49988	0.50012		328.515	0.50597	0.49403		327.229	0.55355	0.44645
										328.774	0.49932	0.50068		328.766	0.56847	0.43153		328.781	0.62038	0.37962		328.77	0.66371	0.33629		328.788	0.78832	0.21168		304.113	0.92629	0.07371		304.112	0.93076	0.06924		328.769	0.5287	0.4713		328.77	0.51389	0.48611		327.483	0.55852	0.44148
										329.029	0.49011	0.50989		329.022	0.56772	0.43228		329.037	0.62533	0.37467		329.025	0.67569	0.32431		329.044	0.79534	0.20466		304.35	0.91581	0.08419		304.349	0.90858	0.09142		329.025	0.49308	0.50692		329.026	0.54407	0.45593		327.738	0.55732	0.44268
										329.285	0.53205	0.46795		329.278	0.54756	0.45244		329.293	0.61595	0.38405		329.282	0.69273	0.30727		329.3	0.79384	0.20616		304.587	0.92402	0.07598		304.586	0.92679	0.07321		329.281	0.47077	0.52923		329.283	0.5295	0.4705		327.994	0.53111	0.46889
										329.541	0.51911	0.48089		329.534	0.55615	0.44385		329.549	0.76006	0.23994		329.537	0.67321	0.32679		329.556	0.79486	0.20514		304.824	0.91899	0.08101		304.823	0.91055	0.08945		329.537	0.51014	0.48986		329.538	0.53082	0.46918		328.248	0.50164	0.49836
										329.797	0.51903	0.48097		329.791	0.55913	0.44087		329.805	0.61069	0.38931		329.794	0.72103	0.27897		329.813	0.78372	0.21628		305.062	0.92408	0.07592		305.06	0.92646	0.07354		329.794	0.49495	0.50505		329.795	0.50676	0.49324		328.504	0.5439	0.4561
										330.053	0.5148	0.4852		330.047	0.57004	0.42996		330.062	0.61116	0.38884		330.049	0.67661	0.32339		330.069	0.79095	0.20905		305.298	0.92418	0.07582		305.297	0.91965	0.08035		330.05	0.5199	0.4801		330.051	0.50567	0.49433		328.758	0.54398	0.45602
										330.31	0.52638	0.47362		330.304	0.56282	0.43718		330.317	0.74523	0.25477		330.305	0.66965	0.33035		330.324	0.79171	0.20829		305.535	0.92501	0.07499		305.533	0.90835	0.09165		330.305	0.5298	0.4702		330.307	0.51015	0.48985		329.014	0.54187	0.45813
										330.565	0.52622	0.47378		330.558	0.5676	0.4324		330.573	1.01172	-0.01172		330.562	0.67656	0.32344		330.58	0.78807	0.21193		305.771	0.90944	0.09056		305.77	0.91639	0.08361		330.562	0.50978	0.49022		330.562	0.53031	0.46969		329.268	0.5429	0.4571
										330.822	0.49509	0.50491		330.815	0.56168	0.43832		330.83	0.61831	0.38169		330.818	0.67418	0.32582		330.837	0.79739	0.20261		306.009	0.92231	0.07769		306.006	0.92782	0.07218		330.817	0.46336	0.53664		330.819	0.50504	0.49496		329.524	0.5446	0.4554
										331.078	0.52531	0.47469		331.07	0.56025	0.43975		331.086	0.62861	0.37139		331.075	0.68061	0.31939		331.092	0.79639	0.20361		306.245	0.90207	0.09793		306.244	0.92551	0.07449		331.073	0.50908	0.49092		331.075	0.51792	0.48208		329.778	0.5552	0.4448
										331.334	0.51143	0.48857		331.327	0.56161	0.43839		331.341	0.60179	0.39821		331.33	0.68148	0.31852		331.349	0.77708	0.22292		306.482	0.92403	0.07597		306.48	0.91959	0.08041		331.33	0.51586	0.48414		331.33	0.50156	0.49844		330.033	0.54391	0.45609
										331.59	0.47577	0.52423		331.583	0.55765	0.44235		331.598	0.62203	0.37797		331.586	0.62388	0.37612		331.604	0.77463	0.22537		306.719	0.91961	0.08039		306.717	0.92418	0.07582		331.586	0.51258	0.48742		331.587	0.52831	0.47169		330.289	0.54709	0.45291
										331.846	0.50358	0.49642		331.839	0.56681	0.43319		331.854	0.62112	0.37888		331.842	0.67454	0.32546		331.861	0.76332	0.23668		306.955	0.93187	0.06813		306.954	0.92336	0.07664		331.842	0.50598	0.49402		331.843	0.52487	0.47513		330.543	0.54873	0.45127
										332.102	0.48176	0.51824		332.096	0.57167	0.42833		332.11	0.61515	0.38485		332.098	0.6736	0.3264		332.117	0.7904	0.2096		307.193	0.92475	0.07525		307.191	0.93086	0.06914		332.098	0.52793	0.47207		332.099	0.51614	0.48386		330.798	0.54258	0.45742
										332.357	0.51746	0.48254		332.351	0.56109	0.43891		332.366	0.63134	0.36866		332.354	0.65391	0.34609		332.373	0.79552	0.20448		307.428	0.93177	0.06823		307.428	0.92556	0.07444		332.354	0.4798	0.5202		332.355	0.53211	0.46789		331.054	0.56245	0.43755
										332.614	0.51099	0.48901		332.607	0.56008	0.43992		332.622	0.62154	0.37846		332.61	0.66118	0.33882		332.63	0.79243	0.20757		307.666	0.91213	0.08787		307.665	0.90751	0.09249		332.61	0.50984	0.49016		332.611	0.43384	0.56616		331.309	0.54223	0.45777
										332.87	0.53714	0.46286		332.863	0.56371	0.43629		332.878	0.59598	0.40402		332.866	0.62616	0.37384		332.885	0.79246	0.20754		307.903	0.92175	0.07825		307.901	0.92413	0.07587		332.866	0.55637	0.44363		332.867	0.50286	0.49714		331.565	0.56755	0.43245
										333.126	0.47657	0.52343		333.12	0.5563	0.4437		333.133	0.76506	0.23494		333.123	0.6537	0.3463		333.141	0.7899	0.2101		308.141	0.92327	0.07673		308.138	0.92036	0.07964		333.122	0.50464	0.49536		333.123	0.53663	0.46337		331.82	0.54329	0.45671
										333.382	0.50474	0.49526		333.375	0.55741	0.44259		333.39	0.61123	0.38877		333.379	0.67532	0.32468		333.397	0.78948	0.21052		308.377	0.90809	0.09191		308.375	0.93556	0.06444		333.378	0.51353	0.48647		333.379	0.53008	0.46992		332.075	0.55051	0.44949
										333.638	0.50433	0.49567		333.632	0.56839	0.43161		333.646	0.61446	0.38554		333.635	0.66257	0.33743		333.653	0.79546	0.20454		308.614	0.91152	0.08848		308.612	0.92197	0.07803		333.633	0.49979	0.50021		333.635	0.51998	0.48002		332.329	0.54821	0.45179
										333.894	0.51146	0.48854		333.888	0.55849	0.44151		333.902	0.623	0.377		333.89	0.66319	0.33681		333.909	0.78646	0.21354		308.85	0.91036	0.08964		308.849	0.9376	0.0624		333.89	0.51436	0.48564		333.891	0.50657	0.49343		332.584	0.56194	0.43806
										334.15	0.53664	0.46336		334.144	0.55064	0.44936		334.158	0.61748	0.38252		334.147	0.67587	0.32413		334.165	0.79074	0.20926		309.087	0.93031	0.06969		309.086	0.92451	0.07549		334.145	0.56411	0.43589		334.147	0.49875	0.50125		332.84	0.5696	0.4304
										334.406	0.50732	0.49268		334.4	0.55708	0.44292		334.414	0.6018	0.3982		334.402	0.62417	0.37583		334.421	0.78304	0.21696		309.324	0.92365	0.07635		309.322	0.89751	0.10249		334.402	0.50588	0.49412		334.403	0.46873	0.53127		333.095	0.54763	0.45237
										334.663	0.52271	0.47729		334.655	0.56232	0.43768		334.67	0.60656	0.39344		334.659	0.67883	0.32117		334.678	0.79071	0.20929		309.561	0.90657	0.09343		309.559	0.92591	0.07409		334.658	0.48637	0.51363		334.66	0.52377	0.47623		333.349	0.54632	0.45368
										334.918	0.49456	0.50544		334.911	0.55459	0.44541		334.926	0.62168	0.37832		334.915	0.64284	0.35716		334.934	0.77896	0.22104		309.798	0.92262	0.07738		309.795	0.93558	0.06442		334.914	0.52881	0.47119		334.916	0.50633	0.49367		333.605	0.55182	0.44818
										335.174	0.50392	0.49608		335.167	0.56184	0.43816		335.182	0.58814	0.41186		335.17	0.6426	0.3574		335.19	0.78985	0.21015		310.034	0.92496	0.07504		310.033	0.91084	0.08916		335.17	0.49059	0.50941		335.172	0.56237	0.43763		333.859	0.55223	0.44777
										335.43	0.52425	0.47575		335.423	0.55524	0.44476		335.439	0.57394	0.42606		335.427	0.62408	0.37592		335.445	0.7795	0.2205		310.271	0.92445	0.07555		310.27	0.8978	0.1022		335.427	0.50505	0.49495		335.427	0.5148	0.4852		334.114	0.54604	0.45396
										335.686	0.50995	0.49005		335.68	0.55937	0.44063		335.694	1.01172	-0.01172		335.683	0.70697	0.29303		335.702	0.79013	0.20987		310.508	0.91058	0.08942		310.506	0.92829	0.07171		335.683	0.65633	0.34367		335.684	0.51902	0.48098		334.37	0.54238	0.45762
										335.942	0.51233	0.48767		335.936	0.56555	0.43445		335.951	0.66147	0.33853		335.939	0.6682	0.3318		335.958	0.78144	0.21856		310.745	0.92418	0.07582		310.743	0.91797	0.08203		335.938	0.5131	0.4869		335.939	0.52397	0.47603		334.625	0.56501	0.43499
										336.199	0.53144	0.46856		336.192	0.55294	0.44706		336.207	0.45775	0.54225		336.195	0.70907	0.29093		336.214	0.78799	0.21201		310.982	0.92836	0.07164		310.981	0.92785	0.07215		336.195	0.50337	0.49663		336.196	0.51607	0.48393		334.88	0.54794	0.45206
										336.455	0.50533	0.49467		336.448	0.56715	0.43285		336.463	0.61768	0.38232		336.451	0.65465	0.34535		336.47	0.77257	0.22743		311.218	0.92698	0.07302		311.217	0.9223	0.0777		336.45	0.50673	0.49327		336.452	0.52061	0.47939		335.135	0.54913	0.45087
										336.711	0.51411	0.48589		336.703	0.56119	0.43881		336.718	0.62544	0.37456		336.707	0.65986	0.34014		336.726	0.79283	0.20717		311.456	0.92485	0.07515		311.455	0.92706	0.07294		336.706	0.59003	0.40997		336.708	0.52235	0.47765		335.39	0.54503	0.45497
										336.968	0.49522	0.50478		336.96	0.5552	0.4448		336.974	0.60795	0.39205		336.963	0.67759	0.32241		336.982	0.78358	0.21642		311.693	0.92765	0.07235		311.691	0.93079	0.06921		336.963	0.52936	0.47064		336.965	0.53182	0.46818		335.645	0.54907	0.45093
										337.223	0.52505	0.47495		337.216	0.55487	0.44513		337.231	0.61699	0.38301		337.22	0.6707	0.3293		337.237	0.77666	0.22334		311.929	0.92502	0.07498		311.927	0.91673	0.08327		337.218	0.51765	0.48235		337.22	0.52185	0.47815		335.899	0.55281	0.44719
										337.479	0.49325	0.50675		337.472	0.54777	0.45223		337.486	0.61251	0.38749		337.475	0.65879	0.34121		337.494	0.77349	0.22651		312.165	0.90819	0.09181		312.164	0.9282	0.0718		337.475	0.52147	0.47853		337.476	0.52124	0.47876		336.155	0.54768	0.45232
										337.735	0.50479	0.49521		337.728	0.57023	0.42977		337.742	0.61604	0.38396		337.732	0.66849	0.33151		337.75	0.77272	0.22728		312.403	0.9111	0.0889		312.402	0.90877	0.09123		337.731	0.46763	0.53237		337.732	0.50506	0.49494		336.41	0.54082	0.45918
										337.992	0.50954	0.49046		337.984	0.57143	0.42857		337.998	0.60379	0.39621		337.988	0.66215	0.33785		338.005	0.7781	0.2219		312.64	0.91546	0.08454		312.638	0.92796	0.07204		337.987	0.54195	0.45805		337.988	0.51489	0.48511		336.665	0.56406	0.43594
										338.247	0.51718	0.48282		338.24	0.55218	0.44782		338.254	0.61041	0.38959		338.244	0.6749	0.3251		338.262	0.78043	0.21957		312.877	0.93319	0.06681		312.874	0.91368	0.08632		338.244	0.50771	0.49229		338.244	0.49551	0.50449		336.921	0.53807	0.46193
										338.503	0.50168	0.49832		338.496	0.57261	0.42739		338.51	0.61571	0.38429		338.499	0.66412	0.33588		338.518	0.7879	0.2121		313.114	0.92113	0.07887		313.112	0.90237	0.09763		338.5	0.51053	0.48947		338.501	0.51059	0.48941		337.176	0.62451	0.37549
										338.759	0.52489	0.47511		338.753	0.5572	0.4428		338.766	0.51291	0.48709		338.755	0.76947	0.23053		338.774	0.78327	0.21673		313.35	0.92226	0.07774		313.349	0.92112	0.07888		338.756	0.50807	0.49193		338.756	0.50381	0.49619		337.43	0.55162	0.44838
										339.015	0.4754	0.5246		339.008	0.55559	0.44441		339.023	0.62776	0.37224		339.012	0.65764	0.34236		339.03	0.79458	0.20542		313.587	0.90943	0.09057		313.585	0.90551	0.09449		339.012	0.51234	0.48766		339.012	0.52762	0.47238		337.686	0.56484	0.43516
										339.272	0.49964	0.50036		339.265	0.55909	0.44091		339.28	0.59888	0.40112		339.268	0.66216	0.33784		339.287	0.78474	0.21526		313.824	0.9276	0.0724		313.823	0.90363	0.09637		339.267	0.55997	0.44003		339.269	0.50211	0.49789		337.94	0.56375	0.43625
										339.528	0.49702	0.50298		339.52	0.55642	0.44358		339.535	0.60936	0.39064		339.523	0.64558	0.35442		339.542	0.79128	0.20872		314.062	0.92358	0.07642		314.059	0.93016	0.06984		339.524	0.51978	0.48022		339.524	0.51147	0.48853		338.195	0.53349	0.46651
										339.784	0.4939	0.5061		339.777	0.5488	0.4512		339.791	0.6102	0.3898		339.781	0.66352	0.33648		339.798	0.77871	0.22129		314.299	0.90872	0.09128		314.296	0.92286	0.07714		339.78	0.50648	0.49352		339.78	0.51558	0.48442		338.45	0.55076	0.44924
										340.039	0.529	0.471		340.033	0.56093	0.43907		340.047	0.60973	0.39027		340.036	0.67286	0.32714		340.054	0.77644	0.22356		314.535	0.93403	0.06597		314.533	0.92204	0.07796		340.036	0.24916	0.75084		340.036	0.50531	0.49469		338.705	0.68874	0.31126
										340.296	0.50983	0.49017		340.288	0.55753	0.44247		340.303	0.6153	0.3847		340.292	0.61092	0.38908		340.31	0.78775	0.21225		314.772	0.9258	0.0742		314.77	0.91354	0.08646		340.293	0.50625	0.49375		340.292	0.4992	0.5008		338.96	0.55206	0.44794
										340.552	0.52958	0.47042		340.545	0.54734	0.45266		340.559	0.61524	0.38476		340.549	0.6724	0.3276		340.567	0.7611	0.2389		315.008	0.9085	0.0915		315.007	0.92221	0.07779		340.549	0.51803	0.48197		340.549	0.51703	0.48297		339.215	0.53952	0.46048
										340.808	0.53741	0.46259		340.8	0.54955	0.45045		340.815	0.60517	0.39483		340.804	0.64755	0.35245		340.823	0.77932	0.22068		315.245	0.93081	0.06919		315.243	0.92665	0.07335		340.804	0.49928	0.50072		340.805	0.51399	0.48601		339.471	0.54205	0.45795
										341.063	0.53116	0.46884		341.057	0.55345	0.44655		341.072	0.61124	0.38876		341.061	0.67077	0.32923		341.079	0.77198	0.22802		315.483	0.9163	0.0837		315.48	0.91308	0.08692		341.061	0.22773	0.77227		341.062	0.50335	0.49665		339.726	0.53269	0.46731
										341.32	0.61331	0.38669		341.313	0.55295	0.44705		341.328	0.59967	0.40033		341.317	0.6821	0.3179		341.334	0.78844	0.21156		315.719	0.9203	0.0797		315.717	0.91326	0.08674		341.316	0.52907	0.47093		341.318	0.51763	0.48237		339.98	0.55017	0.44983
										341.576	0.47558	0.52442		341.569	0.55276	0.44724		341.584	0.60387	0.39613		341.573	0.67643	0.32357		341.591	0.78642	0.21358		315.956	0.92359	0.07641		315.954	0.93196	0.06804		341.572	0.59958	0.40042		341.573	0.5289	0.4711		340.236	0.53496	0.46504
										341.831	0.53077	0.46923		341.826	0.5644	0.4356		341.84	0.52676	0.47324		341.829	0.7752	0.2248		341.847	0.7539	0.2461		316.192	0.90758	0.09242		316.192	0.91345	0.08655		341.829	0.57685	0.42315		341.83	0.51157	0.48843		340.49	0.5564	0.4436
										342.088	0.49679	0.50321		342.081	0.54659	0.45341		342.095	0.6153	0.3847		342.085	0.62077	0.37923		342.102	0.76887	0.23113		316.429	0.93615	0.06385		316.428	0.90812	0.09188		342.084	0.5059	0.4941		342.086	0.53146	0.46854		340.746	0.55643	0.44357
										342.344	0.54066	0.45934		342.337	0.54903	0.45097		342.352	0.60078	0.39922		342.342	0.6605	0.3395		342.359	0.77822	0.22178		316.667	0.92187	0.07813		316.664	0.89612	0.10388		342.341	0.50568	0.49432		342.342	0.49314	0.50686		341	0.55177	0.44823
										342.6	0.5243	0.4757		342.593	0.56087	0.43913		342.607	0.61814	0.38186		342.597	0.58208	0.41792		342.615	0.7843	0.2157		316.903	0.93029	0.06971		316.901	0.92183	0.07817		342.596	0.50619	0.49381		342.598	0.50132	0.49868		341.255	0.54999	0.45001
										342.857	0.53206	0.46794		342.849	0.55203	0.44797		342.864	0.5942	0.4058		342.853	0.66162	0.33838		342.871	0.78542	0.21458		317.141	0.91027	0.08973		317.139	0.9296	0.0704		342.852	0.51141	0.48859		342.854	0.52393	0.47607		341.511	0.54529	0.45471
										343.112	0.50588	0.49412		343.105	0.55325	0.44675		343.119	0.60674	0.39326		343.11	0.69193	0.30807		343.126	0.77183	0.22817		317.377	0.91848	0.08152		317.375	0.91151	0.08849		343.109	0.43455	0.56545		343.11	0.53802	0.46198		341.766	0.54932	0.45068
										343.368	0.52537	0.47463		343.361	0.55536	0.44464		343.377	0.60304	0.39696		343.366	0.66469	0.33531		343.383	0.7823	0.2177		317.614	0.92799	0.07201		317.611	0.92545	0.07455		343.365	0.50699	0.49301		343.366	0.52041	0.47959		342.021	0.53266	0.46734
										343.624	0.53679	0.46321		343.617	0.55343	0.44657		343.632	0.60511	0.39489		343.621	0.68232	0.31768		343.64	0.7883	0.2117		317.851	0.92697	0.07303		317.849	0.90509	0.09491		343.621	0.51649	0.48351		343.622	0.47613	0.52387		342.276	0.53632	0.46368
										343.881	0.4984	0.5016		343.873	0.54828	0.45172		343.888	0.60877	0.39123		343.877	0.6668	0.3332		343.895	0.78862	0.21138		318.088	0.90939	0.09061		318.086	0.91647	0.08353		343.877	0.51145	0.48855		343.879	0.49304	0.50696		342.531	0.53701	0.46299
										344.137	0.49939	0.50061		344.129	0.55283	0.44717		344.144	0.60319	0.39681		344.134	0.67099	0.32901		344.151	0.7911	0.2089		318.325	0.9253	0.0747		318.322	0.9044	0.0956		344.132	0.51243	0.48757		344.134	0.52771	0.47229		342.787	0.5385	0.4615
										344.393	0.5027	0.4973		344.385	0.55079	0.44921		344.4	0.57167	0.42833		344.389	0.6816	0.3184		344.407	0.78816	0.21184		318.562	0.92676	0.07324		318.559	0.93824	0.06176		344.389	0.50342	0.49658		344.39	0.47726	0.52274		343.041	0.55952	0.44048
										344.648	0.50826	0.49174		344.642	0.56297	0.43703		344.656	0.61426	0.38574		344.646	0.66413	0.33587		344.664	0.78859	0.21141		318.798	0.93546	0.06454		318.797	0.93773	0.06227		344.644	0.54148	0.45852		344.646	0.51789	0.48211		343.296	0.55793	0.44207
										344.904	0.52204	0.47796		344.897	0.55269	0.44731		344.912	0.60058	0.39942		344.901	0.66754	0.33246		344.919	0.77595	0.22405		319.035	0.91565	0.08435		319.032	0.91859	0.08141		344.901	0.52153	0.47847		344.903	0.50457	0.49543		343.552	0.54336	0.45664
										345.16	0.50828	0.49172		345.154	0.55661	0.44339		345.169	0.61282	0.38718		345.157	0.66503	0.33497		345.176	0.76454	0.23546		319.272	0.92779	0.07221		319.27	0.92515	0.07485		345.157	0.51629	0.48371		345.158	0.52516	0.47484		343.806	0.5539	0.4461
										345.417	0.51775	0.48225		345.409	0.55323	0.44677		345.425	0.6049	0.3951		345.414	0.66534	0.33466		345.431	0.7813	0.2187		319.509	0.92072	0.07928		319.507	0.90345	0.09655		345.413	0.51271	0.48729		345.414	0.52283	0.47717		344.062	0.54045	0.45955
										345.673	0.50226	0.49774		345.666	0.5446	0.4554		345.681	0.59131	0.40869		345.67	0.66387	0.33613		345.687	0.76059	0.23941		319.746	0.92596	0.07404		319.744	0.91803	0.08197		345.669	0.5137	0.4863		345.67	0.52378	0.47622		344.317	0.54146	0.45854
										345.928	0.51928	0.48072		345.921	0.54945	0.45055		345.936	0.59188	0.40812		345.926	0.64872	0.35128		345.943	0.78294	0.21706		319.982	0.91316	0.08684		319.979	0.91366	0.08634		345.926	0.49084	0.50916		345.927	0.51361	0.48639		344.572	0.53771	0.46229
										346.185	0.5149	0.4851		346.178	0.5527	0.4473		346.192	0.59726	0.40274		346.182	0.63594	0.36406		346.199	0.79178	0.20822		320.219	0.92223	0.07777		320.217	0.92205	0.07795		346.181	0.45148	0.54852		346.182	0.50078	0.49922		344.827	0.54141	0.45859
										346.44	0.51026	0.48974		346.433	0.551	0.449		346.448	0.50015	0.49985		346.438	0.63202	0.36798		346.456	0.77879	0.22121		320.456	0.90901	0.09099		320.454	0.91734	0.08266		346.437	0.34226	0.65774		346.439	0.52485	0.47515		345.082	0.53642	0.46358
										346.696	0.51722	0.48278		346.689	0.55027	0.44973		346.705	0.59339	0.40661		346.693	0.66247	0.33753		346.712	0.76559	0.23441		320.693	0.91881	0.08119		320.691	0.9069	0.0931		346.693	0.41304	0.58696		346.694	0.52639	0.47361		345.336	0.55627	0.44373
										346.953	0.5512	0.4488		346.946	0.55869	0.44131		346.961	0.61149	0.38851		346.949	0.66261	0.33739		346.967	0.78457	0.21543		320.93	0.92576	0.07424		320.928	0.9123	0.0877		346.95	0.45965	0.54035		346.951	0.55982	0.44018		345.591	0.54335	0.45665
										347.209	0.49529	0.50471		347.202	0.55384	0.44616		347.217	0.5913	0.4087		347.205	0.65867	0.34133		347.224	0.78217	0.21783		321.167	0.92363	0.07637		321.166	0.92105	0.07895		347.206	0.50873	0.49127		347.206	0.51485	0.48515		345.847	0.54177	0.45823
										347.465	0.54021	0.45979		347.458	0.55459	0.44541		347.472	0.58895	0.41105		347.462	0.65986	0.34014		347.48	0.78936	0.21064		321.404	0.91042	0.08958		321.402	0.92338	0.07662		347.461	0.4628	0.5372		347.463	0.50201	0.49799		346.102	0.54124	0.45876
										347.721	0.50132	0.49868		347.714	0.55533	0.44467		347.728	0.61687	0.38313		347.718	0.71568	0.28432		347.736	0.77819	0.22181		321.641	0.90861	0.09139		321.639	0.91366	0.08634		347.717	0.5079	0.4921		347.719	0.5178	0.4822		346.357	0.53691	0.46309
										347.976	0.54231	0.45769		347.97	0.55015	0.44985		347.985				347.974	0.66271	0.33729		347.992	0.77788	0.22212		321.877	0.9229	0.0771		321.876	0.90912	0.09088		347.974	0.53903	0.46097		347.975	0.4947	0.5053		346.611	0.54212	0.45788
										348.234	0.536	0.464		348.226	0.54821	0.45179		348.241	0.60668	0.39332		348.23	0.66455	0.33545		348.248	0.78224	0.21776		322.114	0.9211	0.0789		322.112	0.91708	0.08292		348.23	0.52097	0.47903		348.232	0.53056	0.46944		346.867	0.54495	0.45505
										348.489	0.51532	0.48468		348.483	0.5462	0.4538		348.497	0.14602	0.85398		348.487	0.66528	0.33472		348.503	0.76336	0.23664		322.352	0.90208	0.09792		322.348	0.90869	0.09131		348.486	0.74994	0.25006		348.487	0.51477	0.48523		347.122	0.52376	0.47624
										348.745	0.49281	0.50719		348.739	0.55401	0.44599		348.752	0.63108	0.36892		348.742	0.66495	0.33505		348.76	0.78313	0.21687		322.588	0.91865	0.08135		322.585	0.92269	0.07731		348.742	0.52072	0.47928		348.743	0.52122	0.47878		347.377	0.55208	0.44792
										349.001	0.534	0.466		348.994	0.54464	0.45536		349.009	0.5911	0.4089		348.998	0.62149	0.37851		349.016	0.76768	0.23232		322.824	0.92011	0.07989		322.822	0.91243	0.08757		348.998	0.50412	0.49588		349	0.53029	0.46971		347.632	0.54154	0.45846
										349.258	0.50841	0.49159		349.25	0.5511	0.4489		349.264				349.254	0.66007	0.33993		349.272	0.78147	0.21853		323.062	0.91377	0.08623		323.06	0.91501	0.08499		349.254	0.50771	0.49229		349.255	0.52847	0.47153		347.887	0.55601	0.44399
										349.513	0.5025	0.4975		349.507	0.55133	0.44867		349.521	0.61313	0.38687		349.51	0.66236	0.33764		349.528	0.77269	0.22731		323.299	0.89919	0.10081		323.297	0.91144	0.08856		349.51	0.51128	0.48872		349.511	0.50329	0.49671		348.142	0.59798	0.40202
										349.769	0.52584	0.47416		349.762	0.55063	0.44937		349.776	0.67704	0.32296		349.767	0.66396	0.33604		349.785	0.77285	0.22715		323.536	0.9226	0.0774		323.532	0.91138	0.08862		349.766	0.51009	0.48991		349.768	0.5192	0.4808		348.397	0.53701	0.46299
										350.025	0.51216	0.48784		350.018	0.54803	0.45197		350.033	0.59347	0.40653		350.022	0.66165	0.33835		350.04	0.77858	0.22142		323.773	0.93153	0.06847		323.769	0.91084	0.08916		350.022	0.51267	0.48733		350.023	0.50311	0.49689		348.652	0.53011	0.46989
										350.281	0.51493	0.48507		350.274	0.5506	0.4494		350.289	0.59224	0.40776		350.278	0.66748	0.33252		350.297	0.76823	0.23177		324.009	0.92348	0.07652		324.008	0.92519	0.07481		350.278	0.50134	0.49866		350.279	0.52299	0.47701		348.908	0.54539	0.45461
										350.538	0.51408	0.48592		350.53	0.5467	0.4533		350.545	0.61497	0.38503		350.534	0.66662	0.33338		350.552	0.76356	0.23644		324.246	0.93287	0.06713		324.244	0.92641	0.07359		350.534	0.47658	0.52342		350.536	0.52551	0.47449		349.162	0.54274	0.45726
										350.794	0.48894	0.51106		350.787	0.55501	0.44499		350.802	0.60913	0.39087		350.79	0.65524	0.34476		350.808	0.78155	0.21845		324.483	0.93996	0.06004		324.481	0.92486	0.07514		350.79	0.50112	0.49888		350.792	0.5308	0.4692		349.417	0.54183	0.45817
										351.05	0.50397	0.49603		351.042	0.55968	0.44032		351.057	0.58792	0.41208		351.046	0.6565	0.3435		351.065	0.76138	0.23862		324.72	0.91571	0.08429		324.717	0.92289	0.07711		351.046	0.49395	0.50605		351.047	0.51128	0.48872		349.672	0.53524	0.46476
										351.305	0.50497	0.49503		351.299	0.55402	0.44598		351.314	0.61639	0.38361		351.303	0.6476	0.3524		351.321	0.76932	0.23068		324.958	0.91419	0.08581		324.954	0.91733	0.08267		351.302	0.49391	0.50609		351.303	0.49343	0.50657		349.928	0.54785	0.45215
										351.561	0.51645	0.48355		351.555	0.54909	0.45091		351.569	0.59476	0.40524		351.559	0.66428	0.33572		351.576	0.77932	0.22068		325.194	0.90975	0.09025		325.19	0.91475	0.08525		351.559	0.50482	0.49518		351.56	0.52891	0.47109		350.183	0.53123	0.46877
										351.817	0.5249	0.4751		351.811	0.55542	0.44458		351.826	0.60329	0.39671		351.814	0.66417	0.33583		351.833	0.76795	0.23205		325.43	0.92689	0.07311		325.428	0.90549	0.09451		351.814	0.50494	0.49506		351.816	0.52909	0.47091		350.438	0.54107	0.45893
										352.074	0.48867	0.51133		352.067	0.55307	0.44693		352.083	0.60067	0.39933		352.072	0.65068	0.34932		352.089	0.76409	0.23591		325.668	0.92229	0.07771		325.665	0.91986	0.08014		352.07	0.49429	0.50571		352.072	0.51758	0.48242		350.692	0.53834	0.46166
										352.329	0.49051	0.50949		352.324	0.56299	0.43701		352.339	0.61048	0.38952		352.328	0.6585	0.3415		352.345	0.77315	0.22685		325.904	0.92359	0.07641		325.901	0.90655	0.09345		352.326	0.50572	0.49428		352.328	0.50957	0.49043		350.947	0.55368	0.44632
										352.585	0.5125	0.4875		352.579	0.55683	0.44317		352.594	0.60601	0.39399		352.583	0.65239	0.34761		352.6	0.78004	0.21996		326.141	0.93096	0.06904		326.138	0.91257	0.08743		352.583	0.54017	0.45983		352.584	0.50498	0.49502		351.202	0.54385	0.45615
										352.842	0.5086	0.4914		352.836	0.55221	0.44779		352.851	0.60463	0.39537		352.839	0.65827	0.34173		352.857	0.77863	0.22137		326.379	0.90705	0.09295		326.374	0.91046	0.08954		352.838	0.56986	0.43014		352.84	0.55914	0.44086		351.457	0.5408	0.4592
										353.097	0.51753	0.48247		353.091	0.55025	0.44975		353.106	0.58467	0.41533		353.095	0.62442	0.37558		353.113	0.76979	0.23021		326.615	0.90919	0.09081		326.612	0.92687	0.07313		353.095	0.4833	0.5167		353.096	0.52288	0.47712		351.713	0.54577	0.45423
										353.354	0.49102	0.50898		353.347	0.54831	0.45169		353.362	0.59367	0.40633		353.351	0.7126	0.2874		353.369	0.7459	0.2541		326.851	0.91271	0.08729		326.849	0.92143	0.07857		353.35	0.45134	0.54866		353.352	0.51255	0.48745		351.969	0.52479	0.47521
										353.61	0.50763	0.49237		353.602	0.55672	0.44328		353.618	0.59054	0.40946		353.607	0.70009	0.29991		353.626	0.75922	0.24078		327.089	0.92225	0.07775		327.087	0.90734	0.09266		353.606	0.557	0.443		353.608	0.5354	0.4646		352.223	0.5655	0.4345
										353.867	0.50291	0.49709		353.86	0.54643	0.45357		353.875	1.01172	-0.01172		353.863	0.6595	0.3405		353.881	0.76901	0.23099		327.325	0.93337	0.06663		327.323	0.91387	0.08613		353.863	0.51036	0.48964		353.865	0.53892	0.46108		352.478	0.53434	0.46566
										354.122	0.52939	0.47061		354.115	0.54978	0.45022		354.131	0.73319	0.26681		354.119	0.69625	0.30375		354.137	0.75156	0.24844		327.563	0.9019	0.0981		327.559	0.92135	0.07865		354.119	0.51036	0.48964		354.12	0.51338	0.48662		352.733	0.54061	0.45939
										354.379	0.50037	0.49963		354.371	0.54912	0.45088		354.387	0.60144	0.39856		354.376	0.60183	0.39817		354.394	0.75285	0.24715		327.799	0.91313	0.08687		327.796	0.92081	0.07919		354.375	0.51622	0.48378		354.376	0.54411	0.45589		352.988	0.52549	0.47451
										354.634	0.50242	0.49758		354.627	0.55246	0.44754		354.643	0.63482	0.36518		354.632	0.66192	0.33808		354.649	0.76207	0.23793		328.037	0.91141	0.08859		328.033	0.92653	0.07347		354.631	0.61681	0.38319		354.632	0.50851	0.49149		353.243	0.53431	0.46569
										354.89	0.5045	0.4955		354.884	0.57037	0.42963		354.899	0.59343	0.40657		354.887	0.63696	0.36304		354.905	0.78377	0.21623		328.273	0.92495	0.07505		328.269	0.90527	0.09473		354.888	0.49307	0.50693		354.888	0.51574	0.48426		353.498	0.53831	0.46169
										355.146	0.47256	0.52744		355.14	0.55046	0.44954		355.155	0.59815	0.40185		355.144	0.65239	0.34761		355.161	0.77057	0.22943		328.509	0.93	0.07		328.507	0.93476	0.06524		355.143	0.4573	0.5427		355.144	0.49135	0.50865		353.754	0.53198	0.46802
										355.402	0.48919	0.51081		355.396	0.54502	0.45498		355.411	0.58267	0.41733		355.4	0.59794	0.40206		355.417	0.76644	0.23356		328.747	0.90323	0.09677		328.744	0.91068	0.08932		355.399	0.50384	0.49616		355.4	0.50788	0.49212		354.008	0.54397	0.45603
										355.658	0.48014	0.51986		355.652	0.5528	0.4472		355.667	0.59746	0.40254		355.656	0.65546	0.34454		355.673	0.77253	0.22747		328.984	0.90922	0.09078		328.98	0.92169	0.07831		355.655	0.49454	0.50546		355.656	0.51584	0.48416		354.264	0.52272	0.47728
										355.915	0.50086	0.49914		355.907	0.56499	0.43501		355.923	0.6021	0.3979		355.912	0.66306	0.33694		355.93	0.75708	0.24292		329.22	0.92619	0.07381		329.218	0.92048	0.07952		355.911	0.50339	0.49661		355.912	0.5305	0.4695		354.519	0.54543	0.45457
										356.171	0.52076	0.47924		356.164	0.55578	0.44422		356.179	0.59732	0.40268		356.168	0.67213	0.32787		356.185	0.78295	0.21705		329.457	0.91793	0.08207		329.453	0.90971	0.09029		356.167	0.48397	0.51603		356.168	0.50993	0.49007		354.773	0.54213	0.45787
										356.427	0.49523	0.50477		356.419	0.5495	0.4505		356.436	0.59975	0.40025		356.424	0.66016	0.33984		356.442	0.75711	0.24289		329.694	0.90912	0.09088		329.69	0.90247	0.09753		356.424	0.49981	0.50019		356.425	0.51161	0.48839		355.029	0.53507	0.46493
										356.683	0.50991	0.49009		356.676	0.55821	0.44179		356.691	0.60412	0.39588		356.679	0.66744	0.33256		356.697	0.75599	0.24401		329.931	0.91226	0.08774		329.927	0.9051	0.0949		356.679	0.51256	0.48744		356.681	0.54162	0.45838		355.283	0.52624	0.47376
										356.938	0.49549	0.50451		356.932	0.56375	0.43625		356.947	0.60578	0.39422		356.935	0.66484	0.33516		356.953	0.76418	0.23582		330.168	0.92972	0.07028		330.165	0.90532	0.09468		356.935	0.5107	0.4893		356.937	0.48014	0.51986		355.538	0.55264	0.44736
										357.194	0.50858	0.49142		357.188	0.55561	0.44439		357.203	0.51133	0.48867		357.191	0.72464	0.27536		357.21	0.78585	0.21415		330.405	0.89921	0.10079		330.401	0.91427	0.08573		357.191	0.55961	0.44039		357.192	0.50963	0.49037		355.793	0.53769	0.46231
										357.451	0.50905	0.49095		357.443	0.55436	0.44564		357.459	0.5888	0.4112		357.448	0.71519	0.28481		357.465	0.781	0.219		330.643	0.9291	0.0709		330.639	0.90767	0.09233		357.447	0.50766	0.49234		357.449	0.5087	0.4913		356.048	0.43146	0.56854
										357.707	0.51463	0.48537		357.7	0.55091	0.44909		357.715	0.59681	0.40319		357.704	0.66339	0.33661		357.722	0.76614	0.23386		330.879	0.91228	0.08772		330.875	0.90382	0.09618		357.703	0.51441	0.48559		357.705	0.49969	0.50031		356.305	0.53148	0.46852
										357.963	0.49875	0.50125		357.956	0.54142	0.45858		357.971	0.68565	0.31435		357.96	0.62143	0.37857		357.977	0.75809	0.24191		331.115	0.89637	0.10363		331.112	0.90705	0.09295		357.96	0.57964	0.42036		357.961	0.52016	0.47984		356.558	0.53259	0.46741
										358.218	0.51304	0.48696		358.212	0.54658	0.45342		358.227	0.59091	0.40909		358.216	0.64039	0.35961		358.234	0.7643	0.2357		331.353	0.89789	0.10211		331.349	0.90237	0.09763		358.215	0.5161	0.4839		358.217	0.50774	0.49226		356.813	0.5421	0.4579
										358.475	0.49875	0.50125		358.468	0.54779	0.45221		358.483	0.59925	0.40075		358.472	0.60869	0.39131		358.49	0.77532	0.22468		331.59	0.90874	0.09126		331.586	0.9017	0.0983		358.471	0.49683	0.50317		358.473	0.50665	0.49335		357.068	0.55412	0.44588
										358.731	0.51826	0.48174		358.725	0.54031	0.45969		358.74	0.59319	0.40681		358.729	0.66393	0.33607		358.746	0.77761	0.22239		331.827	0.9239	0.0761		331.822	0.91024	0.08976		358.727	0.50924	0.49076		358.729	0.49806	0.50194		357.324	0.5355	0.4645
										358.987	0.50124	0.49876		358.98	0.54684	0.45316		358.996	0.59806	0.40194		358.985	0.65688	0.34312		359.002	0.74305	0.25695		332.062	0.91995	0.08005		332.059	0.91438	0.08562		358.984	0.49444	0.50556		358.985	0.49637	0.50363		357.579	0.53535	0.46465
										359.243	0.50775	0.49225		359.236	0.54768	0.45232		359.252	0.5978	0.4022		359.24	0.66001	0.33999		359.258	0.77663	0.22337		332.3	0.91806	0.08194		332.297	0.91469	0.08531		359.24	1.01172	-0.01172		359.241	0.51211	0.48789		357.833	0.54729	0.45271
										359.5	0.51481	0.48519		359.492	0.54216	0.45784		359.508	0.59626	0.40374		359.496	0.6564	0.3436		359.514	0.76456	0.23544		332.537	0.90883	0.09117		332.533	0.91177	0.08823		359.496	1.01172	-0.01172		359.498	0.50158	0.49842		358.09	0.54025	0.45975
										359.756	0.54694	0.45306		359.748	0.55665	0.44335		359.764	0.60206	0.39794		359.752	0.66008	0.33992		359.771	0.76847	0.23153		332.773	0.91992	0.08008		332.769	0.9248	0.0752		359.752	0.75543	0.24457		359.754	0.53276	0.46724		358.344	0.53765	0.46235
										360.012	0.50545	0.49455		360.004	0.55671	0.44329		360.02	0.59693	0.40307		360.008	0.62522	0.37478		360.026	0.78217	0.21783		333.011	0.91759	0.08241		333.007	0.90587	0.09413		360.007	0.53353	0.46647		360.009	0.5274	0.4726		358.599	0.53325	0.46675
										360.267	0.5054	0.4946		360.26	0.56117	0.43883		360.275	0.6146	0.3854		360.265	0.55087	0.44913		360.282	0.77535	0.22465		333.247	0.9172	0.0828		333.243	0.92747	0.07253		360.264	0.43792	0.56208		360.265	0.50813	0.49187		358.854	0.53471	0.46529
										360.524	0.49763	0.50237		360.516	0.54157	0.45843		360.532	0.59116	0.40884		360.521	0.69119	0.30881		360.539	0.77459	0.22541		333.484	0.89923	0.10077		333.48	0.92063	0.07937		360.52	0.50784	0.49216		360.522	0.53403	0.46597		359.11	0.5441	0.4559
										360.78	0.51672	0.48328		360.772	0.55553	0.44447		360.788	0.90859	0.09141		360.776	0.66805	0.33195		360.794	0.7673	0.2327		333.72	0.91903	0.08097		333.718	0.92413	0.07587		360.776	0.50481	0.49519		360.778	0.51587	0.48413		359.364	0.53083	0.46917
										361.036	0.50584	0.49416		361.028	0.56432	0.43568		361.044	0.59935	0.40065		361.032	0.65928	0.34072		361.05	0.77046	0.22954		333.958	0.92059	0.07941		333.954	0.91123	0.08877		361.032	0.50319	0.49681		361.034	0.50848	0.49152		359.62	0.54715	0.45285
										361.291	0.50107	0.49893		361.284	0.54318	0.45682		361.301	0.59821	0.40179		361.289	0.65429	0.34571		361.307	0.75473	0.24527		334.195	0.92052	0.07948		334.191	0.90344	0.09656		361.288	0.51606	0.48394		361.289	0.53814	0.46186		359.874	0.54906	0.45094
										361.548	0.47533	0.52467		361.541	0.55934	0.44066		361.556	0.58533	0.41467		361.545	0.65065	0.34935		361.562	0.77179	0.22821		334.432	0.91597	0.08403		334.428	0.90856	0.09144		361.545	0.5085	0.4915		361.546	0.52184	0.47816		360.129	0.54461	0.45539
										361.803	0.4975	0.5025		361.797	0.54371	0.45629		361.812	0.59337	0.40663		361.8	0.66523	0.33477		361.819	0.77678	0.22322		334.669	0.91042	0.08958		334.664	0.9094	0.0906		361.8	0.50862	0.49138		361.801	0.51437	0.48563		360.385	0.53495	0.46505
										362.06	0.52777	0.47223		362.053	0.55389	0.44611		362.069	0.58405	0.41595		362.057	0.49576	0.50424		362.074	0.76497	0.23503		334.904	0.90641	0.09359		334.902	0.91757	0.08243		362.057	0.56557	0.43443		362.057	0.51302	0.48698		360.64	0.54771	0.45229
										362.316	0.49366	0.50634		362.309	0.56125	0.43875		362.324	0.5962	0.4038		362.313	0.65327	0.34673		362.33	0.76751	0.23249		335.142	0.9198	0.0802		335.139	0.92355	0.07645		362.312	0.50191	0.49809		362.314	0.51882	0.48118		360.895	0.52014	0.47986
										362.572	0.52323	0.47677		362.564	0.55567	0.44433		362.581	0.59146	0.40854		362.569	0.65136	0.34864		362.586	0.77136	0.22864		335.379	0.90986	0.09014		335.374	0.91017	0.08983		362.569	0.49238	0.50762		362.57	0.50977	0.49023		361.15	0.60783	0.39217
										362.828	0.51195	0.48805		362.821	0.54376	0.45624		362.836	0.59488	0.40512		362.825	0.65702	0.34298		362.843	0.76765	0.23235		335.617	0.91355	0.08645		335.612	0.91483	0.08517		362.824	0.41848	0.58152		362.826	0.50893	0.49107		361.405	0.53683	0.46317
										363.084	0.49037	0.50963		363.077	0.54793	0.45207		363.092	0.60601	0.39399		363.081	0.65015	0.34985		363.099	0.78047	0.21953		335.853	0.90892	0.09108		335.849	0.8951	0.1049		363.08	0.29969	0.70031		363.082	0.52498	0.47502		361.659	0.53708	0.46292
										363.34	0.5047	0.4953		363.333	0.55185	0.44815		363.349	0.59614	0.40386		363.337	0.64734	0.35266		363.354	0.77702	0.22298		336.09	0.9105	0.0895		336.086	0.91358	0.08642		363.337	0.48595	0.51405		363.338	0.53027	0.46973		361.915	0.57932	0.42068
										363.596	0.52625	0.47375		363.589	0.54221	0.45779		363.605	0.59347	0.40653		363.593	0.65912	0.34088		363.611	0.77816	0.22184		336.326	0.91384	0.08616		336.322	0.91054	0.08946		363.593	0.49167	0.50833		363.594	0.50752	0.49248		362.17	0.538	0.462
										363.852	0.51834	0.48166		363.845	0.53799	0.46201		363.861	0.59097	0.40903		363.85	0.66181	0.33819		363.867	0.77406	0.22594		336.563	0.90658	0.09342		336.558	0.90587	0.09413		363.849	0.48536	0.51464		363.851	0.49404	0.50596		362.425	0.53388	0.46612
										364.108	0.5034	0.4966		364.101	0.54508	0.45492		364.116	0.59209	0.40791		364.105	0.6605	0.3395		364.122	0.76564	0.23436		336.8	0.91951	0.08049		336.797	0.90348	0.09652		364.105	0.51613	0.48387		364.106	0.52501	0.47499		362.68	0.54576	0.45424
										364.364	0.50466	0.49534		364.357	0.54713	0.45287		364.373	0.56798	0.43202		364.361	0.64904	0.35096		364.379	0.77259	0.22741		337.038	0.90995	0.09005		337.033	0.92369	0.07631		364.36	0.49442	0.50558		364.362	0.54134	0.45866		362.935	0.54513	0.45487
										364.62	0.48991	0.51009		364.613	0.56263	0.43737		364.629	0.59548	0.40452		364.618	0.6585	0.3415		364.634	0.77128	0.22872		337.273	0.89934	0.10066		337.27	0.90057	0.09943		364.616	0.49931	0.50069		364.619	0.52679	0.47321		363.19	0.54004	0.45996
										364.876	0.50517	0.49483		364.87	0.55551	0.44449		364.884	0.59471	0.40529		364.874	0.65748	0.34252		364.89	0.75646	0.24354		337.511	0.91738	0.08262		337.507	0.92109	0.07891		364.873	0.48876	0.51124		364.875	0.49538	0.50462		363.445	0.54894	0.45106
										365.133	0.4964	0.5036		365.125	0.54758	0.45242		365.141	0.803	0.197		365.129	0.6455	0.3545		365.147	0.76408	0.23592		337.748	0.90411	0.09589		337.744	0.90978	0.09022		365.129	0.50924	0.49076		365.131	0.54326	0.45674		363.7	0.54561	0.45439
										365.389	0.49863	0.50137		365.382	0.54596	0.45404		365.397	0.58916	0.41084		365.385	0.6563	0.3437		365.403	0.77149	0.22851		337.985	0.90391	0.09609		337.98	0.91704	0.08296		365.385	0.50344	0.49656		365.386	0.50245	0.49755		363.956	0.54455	0.45545
										365.644	0.52147	0.47853		365.638	0.54401	0.45599		365.653	0.59813	0.40187		365.641	0.65474	0.34526		365.659	0.76941	0.23059		338.222	0.90635	0.09365		338.217	0.90768	0.09232		365.642	0.50065	0.49935		365.642	0.49589	0.50411		364.21	0.54013	0.45987
										365.9	0.50596	0.49404		365.893	0.55512	0.44488		365.909	0.61595	0.38405		365.898	0.61728	0.38272		365.916	0.77796	0.22204		338.458	0.91347	0.08653		338.455	0.90243	0.09757		365.897	0.54563	0.45437		365.899	0.51104	0.48896		364.465	0.55543	0.44457
										366.156	0.52498	0.47502		366.149	0.55777	0.44223		366.166	0.58219	0.41781		366.154	0.65099	0.34901		366.172	0.7792	0.2208		338.695	0.90725	0.09275		338.69	0.91922	0.08078		366.154	0.45659	0.54341		366.155	0.52081	0.47919		364.72	0.52691	0.47309
										366.413	0.53115	0.46885		366.406	0.54843	0.45157		366.422	0.57432	0.42568		366.409	0.64727	0.35273		366.427	0.77743	0.22257		338.932	0.92227	0.07773		338.927	0.90565	0.09435		366.409	0.51821	0.48179		366.411	0.50466	0.49534		364.975	0.53703	0.46297
										366.668	0.50647	0.49353		366.662	0.5403	0.4597		366.677	0.59723	0.40277		366.666	0.63338	0.36662		366.684	0.75492	0.24508		339.169	0.91613	0.08387		339.164	0.92011	0.07989		366.664	0.49677	0.50323		366.667	0.51742	0.48258		365.23	0.53651	0.46349
										366.924	0.50714	0.49286		366.917	0.54411	0.45589		366.933	0.60005	0.39995		366.921	0.6261	0.3739		366.939	0.77538	0.22462		339.404	0.90238	0.09762		339.401	0.91693	0.08307		366.921	0.48507	0.51493		366.923	0.5049	0.4951		365.485	0.50122	0.49878
										367.181	0.4933	0.5067		367.173	0.54437	0.45563		367.189	0.59603	0.40397		367.178	0.64488	0.35512		367.196	0.75912	0.24088		339.642	0.92385	0.07615		339.638	0.91321	0.08679		367.177	0.50034	0.49966		367.178	0.49271	0.50729		365.741	0.5209	0.4791
										367.437	0.51138	0.48862		367.429	0.5585	0.4415		367.446	0.59913	0.40087		367.433	0.65408	0.34592		367.453	0.77654	0.22346		339.88	0.92397	0.07603		339.876	0.914	0.086		367.433	0.49368	0.50632		367.434	0.5067	0.4933		365.995	0.53406	0.46594
										367.692	0.50789	0.49211		367.686	0.5505	0.4495		367.702	0.58028	0.41972		367.689	0.67227	0.32773		367.708	0.75544	0.24456		340.116	0.92104	0.07896		340.112	0.91374	0.08626		367.69	0.51632	0.48368		367.691	0.50127	0.49873		366.251	0.53607	0.46393
										367.948	0.50794	0.49206		367.942	0.55355	0.44645		367.958	0.60275	0.39725		367.946	0.65785	0.34215		367.965	0.74857	0.25143		340.353	0.91633	0.08367		340.348	0.91724	0.08276		367.945	0.74037	0.25963		367.947	0.47391	0.52609		366.505	0.53849	0.46151
										368.205	0.49276	0.50724		368.198	0.55752	0.44248		368.213	0.60144	0.39856		368.201	0.63215	0.36785		368.221	0.7734	0.2266		340.591	0.91399	0.08601		340.586	0.91508	0.08492		368.201	0.48773	0.51227		368.203	0.48954	0.51046		366.76	0.53423	0.46577
										368.46	0.53769	0.46231		368.454	0.54528	0.45472		368.469	0.6173	0.3827		368.458	0.65103	0.34897		368.477	0.7432	0.2568		340.826	0.92365	0.07635		340.822	0.89796	0.10204		368.458	0.51536	0.48464		368.459	0.53382	0.46618		367.016	0.52669	0.47331
										368.718	0.51881	0.48119		368.71	0.54963	0.45037		368.726	0.59102	0.40898		368.714	0.64543	0.35457		368.733	0.78025	0.21975		341.063	0.91697	0.08303		341.06	0.91515	0.08485		368.713	0.49681	0.50319		368.715	0.48919	0.51081		367.27	0.52089	0.47911
										368.973	0.50798	0.49202		368.966	0.54709	0.45291		368.982	0.58647	0.41353		368.97	0.64654	0.35346		368.989	0.74986	0.25014		341.3	0.91124	0.08876		341.296	0.91007	0.08993		368.969	0.48907	0.51093		368.971	0.52318	0.47682		367.525	0.54722	0.45278
										369.228	0.51257	0.48743		369.222	0.5477	0.4523		369.237	0.58427	0.41573		369.226	0.64667	0.35333		369.245	0.78018	0.21982		341.537	0.89246	0.10754		341.532	0.90296	0.09704		369.225	0.5486	0.4514		369.228	0.49517	0.50483		367.781	0.54825	0.45175
										369.485	0.50636	0.49364		369.478	0.54089	0.45911		369.493	0.5906	0.4094		369.482	0.63782	0.36218		369.5	0.76668	0.23332		341.775	0.91434	0.08566		341.77	0.90269	0.09731		369.482	0.3742	0.6258		369.484	0.48676	0.51324		368.036	0.53904	0.46096
										369.741	0.50736	0.49264		369.735	0.54886	0.45114		369.749	0.59522	0.40478		369.738	0.63823	0.36177		369.758	0.77972	0.22028		342.011	0.91655	0.08345		342.007	0.89863	0.10137		369.738	0.49767	0.50233		369.739	0.5081	0.4919		368.291	0.53762	0.46238
										369.997	0.50253	0.49747		369.99	0.55953	0.44047		370.006	0.59617	0.40383		369.994	0.6564	0.3436		370.012	0.76406	0.23594		342.247	0.90931	0.09069		342.244	0.916	0.084		369.994	0.50054	0.49946		369.995	0.52026	0.47974		368.546	0.53755	0.46245
										370.253	0.48511	0.51489		370.246	0.555	0.445		370.261	0.81281	0.18719		370.25	0.65316	0.34684		370.269	0.76195	0.23805		342.485	0.91113	0.08887		342.48	0.92879	0.07121		370.249	0.50208	0.49792		370.251	0.504	0.496		368.801	0.54534	0.45466
										370.51	0.50232	0.49768		370.502	0.54454	0.45546		370.518	0.59551	0.40449		370.506	0.64822	0.35178		370.525	0.76097	0.23903		342.722	0.92369	0.07631		342.717	0.90148	0.09852		370.506	0.36446	0.63554		370.507	0.51647	0.48353		369.056	0.55715	0.44285
										370.766	0.51995	0.48005		370.759	0.5412	0.4588		370.775	0.59548	0.40452		370.762	0.64546	0.35454		370.781	0.77409	0.22591		342.958	0.91279	0.08721		342.954	0.91409	0.08591		370.761	0.49675	0.50325		370.763	0.53086	0.46914		369.311	0.52809	0.47191
										371.021	0.50395	0.49605		371.014	0.54673	0.45327		371.029	0.58886	0.41114		371.018	0.62807	0.37193		371.036	0.77494	0.22506		343.194	0.89985	0.10015		343.191	0.93223	0.06777		371.018	0.45423	0.54577		371.019	0.49252	0.50748		369.566	0.53457	0.46543
										371.277	0.54124	0.45876		371.271	0.54663	0.45337		371.286	0.59491	0.40509		371.274	0.64605	0.35395		371.294	0.76057	0.23943		343.432	0.89784	0.10216		343.429	0.91682	0.08318		371.274	0.68939	0.31061		371.275	0.51292	0.48708		369.822	0.53319	0.46681
										371.533	0.51609	0.48391		371.526	0.53739	0.46261		371.542	0.59396	0.40604		371.53	0.64836	0.35164		371.549	0.76055	0.23945		343.668	0.91521	0.08479		343.665	0.8977	0.1023		371.53	0.49283	0.50717		371.531	0.52276	0.47724		370.076	0.55676	0.44324
										371.789	0.51735	0.48265		371.783	0.5391	0.4609		371.798	0.55225	0.44775		371.787	0.63791	0.36209		371.805	0.74801	0.25199		343.906	0.90463	0.09537		343.901	0.92092	0.07908		371.786	0.47687	0.52313		371.788	0.51556	0.48444		370.331	0.53434	0.46566
										372.046	0.51353	0.48647		372.039	0.54649	0.45351		372.054	0.57783	0.42217		372.043	0.64096	0.35904		372.061	0.76653	0.23347		344.141	0.92158	0.07842		344.138	0.91366	0.08634		372.042	0.5045	0.4955		372.043	0.48722	0.51278		370.587	0.52868	0.47132
										372.301	0.52945	0.47055		372.294	0.55125	0.44875		372.311	0.58575	0.41425		372.299	0.66045	0.33955		372.317	0.75315	0.24685		344.378	0.90041	0.09959		344.375	0.9001	0.0999		372.298	0.49316	0.50684		372.299	0.51459	0.48541		370.841	0.53853	0.46147
										372.557	0.48946	0.51054		372.55	0.54344	0.45656		372.566	0.59499	0.40501		372.555	0.65784	0.34216		372.573	0.76515	0.23485		344.615	0.92597	0.07403		344.612	0.89702	0.10298		372.554	0.49962	0.50038		372.555	0.50293	0.49707		371.097	0.54166	0.45834
										372.814	0.48879	0.51121		372.807	0.55326	0.44674		372.822	0.57773	0.42227		372.81	0.65237	0.34763		372.829	0.77134	0.22866		344.853	0.9147	0.0853		344.849	0.89456	0.10544		372.81	0.4935	0.5065		372.812	0.50341	0.49659		371.351	0.53931	0.46069
										373.07	0.51928	0.48072		373.063	0.5457	0.4543		373.078	0.58956	0.41044		373.067	0.62689	0.37311		373.085	0.76324	0.23676		345.09	0.90663	0.09337		345.085	0.90625	0.09375		373.066	0.48417	0.51583		373.068	0.50617	0.49383		371.606	0.54124	0.45876
										373.326	0.50457	0.49543		373.318	0.55637	0.44363		373.335	0	1		373.322	0.64627	0.35373		373.341	0.77343	0.22657		345.326	0.91899	0.08101		345.322	0.90023	0.09977		373.322	0.49281	0.50719		373.324	0.50264	0.49736		371.862	0.53004	0.46996
										373.581	0.50731	0.49269		373.575	0.53905	0.46095		373.591	0.59812	0.40188		373.579	0.65658	0.34342		373.598	0.76249	0.23751		345.562	0.90811	0.09189		345.56	0.91111	0.08889		373.578	0.50138	0.49862		373.58	0.52108	0.47892		372.116	0.5381	0.4619
										373.838	0.4905	0.5095		373.831	0.54607	0.45393		373.846	0.58221	0.41779		373.834	0.64354	0.35646		373.853	0.74814	0.25186		345.801	0.91202	0.08798		345.797	0.91743	0.08257		373.835	0.47336	0.52664		373.836	0.52106	0.47894		372.372	0.54465	0.45535
										374.094	0.49132	0.50868		374.087	0.534	0.466		374.103	1.01172	-0.01172		374.091	0.64553	0.35447		374.11	0.7577	0.2423		346.037	0.92547	0.07453		346.032	0.9109	0.0891		374.09	0.52461	0.47539		374.092	0.55154	0.44846		372.627	0.54292	0.45708
										374.35	0.50021	0.49979		374.343	0.54273	0.45727		374.358	0.37706	0.62294		374.347	0.65392	0.34608		374.365	0.76619	0.23381		346.274	0.91366	0.08634		346.27	0.90837	0.09163		374.346	0.52552	0.47448		374.348	0.49943	0.50057		372.881	0.53735	0.46265
										374.606	0.50557	0.49443		374.6	0.54231	0.45769		374.615	1.01172	-0.01172		374.603	0.62948	0.37052		374.622	0.76468	0.23532		346.512	0.91178	0.08822		346.507	0.90198	0.09802		374.603	0.48979	0.51021		374.604	0.5297	0.4703		373.137	0.55811	0.44189
										374.862	0.5174	0.4826		374.855	0.55132	0.44868		374.871	0.31893	0.68107		374.859	0.64194	0.35806		374.877	0.7687	0.2313		346.747	0.91404	0.08596		346.744	0.91702	0.08298		374.859	0.53164	0.46836		374.86	0.49173	0.50827		373.392	0.55051	0.44949
										375.118	0.49944	0.50056		375.111	0.54716	0.45284		375.126	0.58464	0.41536		375.115	0.65831	0.34169		375.134	0.75521	0.24479		346.985	0.91823	0.08177		346.981	0.90925	0.09075		375.115	0.50549	0.49451		375.117	0.51664	0.48336		373.647	0.53895	0.46105
										375.374	0.51076	0.48924		375.367	0.5467	0.4533		375.383	0.57523	0.42477		375.371	0.61192	0.38808		375.39	0.76217	0.23783		347.221	0.91576	0.08424		347.217	0.92526	0.07474		375.371	0.51515	0.48485		375.372	0.52522	0.47478		373.902	0.53942	0.46058
										375.63	0.52944	0.47056		375.623	0.5389	0.4611		375.639	0.59204	0.40796		375.627	0.63063	0.36937		375.647	0.76842	0.23158		347.458	0.91745	0.08255		347.453	0.91954	0.08046		375.628	0.48087	0.51913		375.628	0.51873	0.48127		374.157	0.52655	0.47345
										375.887	0.49804	0.50196		375.88	0.55219	0.44781		375.894	0.6036	0.3964		375.884	0.67863	0.32137		375.902	0.72008	0.27992		347.695	0.89523	0.10477		347.691	0.90504	0.09496		375.882	0.49746	0.50254		375.884	0.50553	0.49447		374.411	0.53251	0.46749
										376.143	0.49717	0.50283		376.135	0.55044	0.44956		376.151	0.58274	0.41726		376.14	0.6564	0.3436		376.158	0.76393	0.23607		347.932	0.90984	0.09016		347.928	0.90601	0.09399		376.139	0.49457	0.50543		376.141	0.48262	0.51738		374.668	0.49527	0.50473
										376.398	0.51235	0.48765		376.391	0.5488	0.4512		376.407	0.5864	0.4136		376.396	0.64618	0.35382		376.414	0.76365	0.23635		348.168	0.91467	0.08533		348.165	0.91397	0.08603		376.394	0.51343	0.48657		376.396	0.52257	0.47743		374.922	0.52778	0.47222
										376.654	0.50234	0.49766		376.648	0.5438	0.4562		376.664	0.59899	0.40101		376.651	0.56821	0.43179		376.67	0.77053	0.22947		348.406	0.91663	0.08337		348.402	0.90305	0.09695		376.651	0.51143	0.48857		376.652	0.51178	0.48822		375.177	0.54184	0.45816
										376.91	0.49073	0.50927		376.904	0.55371	0.44629		376.92	0.04971	0.95029		376.907	0.65026	0.34974		376.927	0.77109	0.22891		348.642	0.93382	0.06618		348.638	0.93004	0.06996		376.907	0.55056	0.44944		376.908	0.49532	0.50468		375.432	0.52517	0.47483
										377.166	0.47699	0.52301		377.16	0.53743	0.46257		377.175	0.58978	0.41022		377.163	0.65015	0.34985		377.183	0.7735	0.2265		348.878	0.90634	0.09366		348.875	0.90625	0.09375		377.162	0.51595	0.48405		377.164	0.52313	0.47687		375.687	0.5433	0.4567
										377.422	0.49869	0.50131		377.415	0.56087	0.43913		377.431	0.58942	0.41058		377.419	0.68348	0.31652		377.438	0.76856	0.23144		349.115	0.9319	0.0681		349.113	0.91054	0.08946		377.419	0.52463	0.47537		377.421	0.48279	0.51721		375.942	0.53221	0.46779
										377.679	0.5243	0.4757		377.671	0.54891	0.45109		377.688	0.5836	0.4164		377.676	0.64108	0.35892		377.695	0.77215	0.22785		349.353	0.9148	0.0852		349.35	0.9054	0.0946		377.675	0.5961	0.4039		377.677	0.50348	0.49652		376.198	0.53619	0.46381
										377.935	0.46551	0.53449		377.928	0.55	0.45		377.943	0.68895	0.31105		377.932	0.64356	0.35644		377.95	0.76701	0.23299		349.589	0.91563	0.08437		349.585	0.92627	0.07373		377.932	0.4999	0.5001		377.933	0.52312	0.47688		376.452	0.55544	0.44456
										378.191	0.50416	0.49584		378.184	0.54408	0.45592		378.199	0.59632	0.40368		378.188	0.65304	0.34696		378.206	0.75173	0.24827		349.827	0.91225	0.08775		349.822	0.91806	0.08194		378.187	0.59325	0.40675		378.188	0.49539	0.50461		376.707	0.54132	0.45868
										378.446	0.4765	0.5235		378.44	0.55283	0.44717		378.455	0.38868	0.61132		378.443	0.65985	0.34015		378.463	0.76928	0.23072		350.064	0.90991	0.09009		350.059	0.91643	0.08357		378.444	0.55171	0.44829		378.444	0.49774	0.50226		376.962	0.53624	0.46376
										378.703	0.50344	0.49656		378.696	0.55508	0.44492		378.712	0.59177	0.40823		378.7	0.63522	0.36478		378.718	0.74358	0.25642		350.299	0.89976	0.10024		350.296	0.91332	0.08668		378.7	0.50809	0.49191		378.701	0.53182	0.46818		377.217	0.5481	0.4519
										378.959	0.51938	0.48062		378.951	0.55001	0.44999		378.967	0.55985	0.44015		378.956	0.66728	0.33272		378.975	0.76859	0.23141		350.537	0.93308	0.06692		350.534	0.92072	0.07928		378.955	0.51566	0.48434		378.957	0.51477	0.48523		377.472	0.53603	0.46397
										379.215	0.51304	0.48696		379.207	0.54386	0.45614		379.224	0.58071	0.41929		379.212	0.65052	0.34948		379.231	0.75311	0.24689		350.774	0.90805	0.09195		350.77	0.90346	0.09654		379.211	0.50069	0.49931		379.213	0.54258	0.45742		377.728	0.5406	0.4594
										379.471	0.50331	0.49669		379.464	0.54251	0.45749		379.48	0.59612	0.40388		379.468	0.69085	0.30915		379.487	0.75563	0.24437		351.011	0.91594	0.08406		351.007	0.92208	0.07792		379.468	0.50813	0.49187		379.469	0.49656	0.50344		377.983	0.53067	0.46933
										379.727	0.49902	0.50098		379.72	0.53623	0.46377		379.736	0.58369	0.41631		379.725	0.63277	0.36723		379.743	0.74809	0.25191		351.247	0.91198	0.08802		351.243	0.91355	0.08645		379.723	0.40021	0.59979		379.725	0.50621	0.49379		378.238	0.5374	0.4626
										379.983	0.52811	0.47189		379.976	0.54255	0.45745		379.991	0.57596	0.42404		379.98	0.659	0.341		379.998	0.75904	0.24096		351.484	0.92022	0.07978		351.481	0.89933	0.10067		379.98	0.55271	0.44729		379.982	0.48157	0.51843		378.493	0.26209	0.73791
										380.239	0.51057	0.48943		380.232	0.55908	0.44092		380.247	0.58517	0.41483		380.237	0.66397	0.33603		380.255	0.76842	0.23158		351.721	0.90222	0.09778		351.718	0.90782	0.09218		380.236	0.49647	0.50353		380.237	0.53367	0.46633		378.747	0.52994	0.47006
										380.495	0.53034	0.46966		380.488	0.53484	0.46516		380.504	0.57949	0.42051		380.493	0.64238	0.35762		380.511	0.76525	0.23475		351.959	0.91459	0.08541		351.954	0.9122	0.0878		380.492	0.49833	0.50167		380.493	0.48325	0.51675		379.003	0.54111	0.45889
										380.751	0.50246	0.49754		380.744	0.5454	0.4546		380.76	0.5884	0.4116		380.748	0.6559	0.3441		380.767	0.7655	0.2345		352.196	0.91126	0.08874		352.19	0.89284	0.10716		380.748	0.50338	0.49662		380.749	0.52766	0.47234		379.258	0.53849	0.46151
										381.007	0.51475	0.48525		381.001	0.54505	0.45495		381.017	0.58507	0.41493		381.005	0.6566	0.3434		381.023	0.75827	0.24173		352.433	0.91758	0.08242		352.428	0.91157	0.08843		381.004	0.50066	0.49934		381.005	0.52396	0.47604		379.513	0.53969	0.46031
										381.263	0.50625	0.49375		381.256	0.54295	0.45705		381.272	0.54444	0.45556		381.26	0.65326	0.34674		381.279	0.7671	0.2329		352.668	0.91393	0.08607		352.665	0.89749	0.10251		381.26	0.4958	0.5042		381.261	0.50108	0.49892		379.768	0.54635	0.45365
										381.519	0.49756	0.50244		381.512	0.55469	0.44531		381.528	0.5826	0.4174		381.517	0.64942	0.35058		381.536	0.77054	0.22946		352.905	0.9045	0.0955		352.902	0.90253	0.09747		381.516	0.47642	0.52358		381.517	0.53105	0.46895		380.023	0.53706	0.46294
										381.775	0.52268	0.47732		381.78	0.54163	0.45837		381.783	0.73077	0.26923		381.773	0.64143	0.35857		381.791	0.77112	0.22888		353.142	0.92534	0.07466		353.139	0.90269	0.09731		381.773	0.46996	0.53004		381.773	0.47378	0.52622		380.278	0.53408	0.46592
										382.031	0.51868	0.48132		382.034	0.54741	0.45259		382.04	0.58652	0.41348		382.028	0.55009	0.44991		382.047	0.7649	0.2351		353.38	0.91881	0.08119		353.376	0.90963	0.09037		382.028	0.51736	0.48264		382.029	0.53475	0.46525		380.533	0.53623	0.46377
										382.287	0.5101	0.4899		382.29	0.54271	0.45729		382.296	0.5869	0.4131		382.284	0.64704	0.35296		382.303	0.76447	0.23553		353.616	0.91402	0.08598		353.612	0.88998	0.11002		382.284	0.3568	0.6432		382.286	0.52577	0.47423		380.788	0.53214	0.46786
										382.544	0.50737	0.49263		382.544	0.5418	0.4582		382.552	0.59111	0.40889		382.54	0.64769	0.35231		382.56	0.75944	0.24056		353.853	0.91454	0.08546		353.849	0.914	0.086		382.54	0.51517	0.48483		382.542	0.5025	0.4975		381.043	0.53677	0.46323
										382.799	0.502	0.498		382.801	0.54904	0.45096		382.808	0.59869	0.40131		382.796	0.62167	0.37833		382.816	0.74254	0.25746		354.09	0.90706	0.09294		354.087	0.90899	0.09101		382.796	0.51263	0.48737		382.798	0.5227	0.4773		381.299	0.53436	0.46564
										383.056	0.48294	0.51706		383.056	0.54235	0.45765		383.064	0.58487	0.41513		383.053	0.63778	0.36222		383.071	0.76218	0.23782		354.326	0.92788	0.07212		354.323	0.9133	0.0867		383.052	0.36041	0.63959		383.053	0.48532	0.51468		381.553	0.54123	0.45877
										383.311	0.50824	0.49176		383.313	0.53716	0.46284		383.32	0.5956	0.4044		383.308	0.63891	0.36109		383.328	0.74769	0.25231		354.564	0.91629	0.08371		354.561	0.90323	0.09677		383.309	0.50936	0.49064		383.309	0.4995	0.5005		381.808	0.52878	0.47122
										383.568	0.51976	0.48024		383.568	0.54796	0.45204		383.576	0.58624	0.41376		383.565	0.63786	0.36214		383.584	0.76809	0.23191		354.799	0.9059	0.0941		354.796	0.91217	0.08783		383.564	0.50988	0.49012		383.565	0.50729	0.49271		382.064	0.52992	0.47008
										383.824	0.48652	0.51348		383.824	0.54652	0.45348		383.833	0.58399	0.41601		383.821	0.64355	0.35645		383.839	0.75661	0.24339		355.038	0.90499	0.09501		355.033	0.90933	0.09067		383.821	0.49605	0.50395		383.821	0.51692	0.48308		382.319	0.44555	0.55445
										384.08	0.51121	0.48879		384.081	0.54224	0.45776		384.089	0.58482	0.41518		384.077	0.63681	0.36319		384.096	0.76841	0.23159		355.273	0.92079	0.07921		355.27	0.90617	0.09383		384.076	0.49463	0.50537		384.078	0.51418	0.48582		382.574	0.52091	0.47909
										384.336	0.50573	0.49427		384.336	0.54811	0.45189		384.344	0.58462	0.41538		384.333	0.64452	0.35548		384.352	0.76813	0.23187		355.511	0.92586	0.07414		355.506	0.90913	0.09087		384.333	0.48283	0.51717		384.333	0.50226	0.49774		382.829	0.53559	0.46441
										384.592	0.50922	0.49078		384.592	0.53551	0.46449		384.601	0.58779	0.41221		384.589	0.63674	0.36326		384.607	0.76126	0.23874		355.747	0.92419	0.07581		355.744	0.8944	0.1056		384.588	0.50546	0.49454		384.59	0.49787	0.50213		383.084	0.5684	0.4316
										384.848	0.48864	0.51136		384.849	0.53177	0.46823		384.857	0.58947	0.41053		384.845	0.63211	0.36789		384.864	0.75907	0.24093		355.984	0.90524	0.09476		355.981	0.91141	0.08859		384.845	0.50869	0.49131		384.846	0.5093	0.4907		383.339	0.53171	0.46829
										385.103	0.51086	0.48914		385.105	0.53654	0.46346		385.112	0.57799	0.42201		385.101	0.64958	0.35042		385.12	0.75986	0.24014		356.221	0.92497	0.07503		356.217	0.90871	0.09129		385.101	0.49921	0.50079		385.102	0.50736	0.49264		383.594	0.52931	0.47069
										385.359	0.49756	0.50244		385.361	0.53937	0.46063		385.369	0.58108	0.41892		385.358	0.64549	0.35451		385.376	0.74723	0.25277		356.458	0.90972	0.09028		356.454	0.90149	0.09851		385.357	0.58294	0.41706		385.358	0.51976	0.48024		383.849	0.53294	0.46706
										385.616	0.49235	0.50765		385.617	0.54141	0.45859		385.624	0.57327	0.42673		385.613	0.50189	0.49811		385.632	0.7499	0.2501		356.695	0.91793	0.08207		356.69	0.93153	0.06847		385.612	0.55156	0.44844		385.615	0.50124	0.49876		384.104	0.53655	0.46345
										385.873	0.50832	0.49168		385.874	0.5383	0.4617		385.881	0.5988	0.4012		385.869	0.71984	0.28016		385.888	0.75699	0.24301		356.931	0.91621	0.08379		356.927	0.90653	0.09347		385.868	0.5094	0.4906		385.87	0.47727	0.52273		384.359	0.53751	0.46249
										386.128	0.48529	0.51471		386.129	0.5382	0.4618		386.137	1.01172	-0.01172		386.125	0.57492	0.42508		386.144	0.76499	0.23501		357.168	0.92264	0.07736		357.165	0.89941	0.10059		386.125	0.51584	0.48416		386.126	0.51775	0.48225		384.614	0.54577	0.45423
										386.384	0.50389	0.49611		386.385	0.55329	0.44671		386.393	0.86928	0.13072		386.382	0.57496	0.42504		386.4	0.7674	0.2326		357.406	0.89289	0.10711		357.403	0.93983	0.06017		386.381	0.53048	0.46952		386.382	0.49679	0.50321		384.869	0.52162	0.47838
										386.64	0.50816	0.49184		386.641	0.53537	0.46463		386.649	0.58676	0.41324		386.638	0.64201	0.35799		386.656	0.7434	0.2566		357.642	0.92006	0.07994		357.639	0.89496	0.10504		386.636	0.50107	0.49893		386.638	0.51309	0.48691		385.124	0.53202	0.46798
										386.896	0.51027	0.48973		386.897	0.55323	0.44677		386.905	0.58884	0.41116		386.893	0.64201	0.35799		386.912	0.74737	0.25263		357.879	0.90864	0.09136		357.876	0.90474	0.09526		386.892	0.51686	0.48314		386.895	0.51658	0.48342		385.379	0.54046	0.45954
										387.152	0.51726	0.48274		387.153	0.54248	0.45752		387.162	0.59306	0.40694		387.15	0.63912	0.36088		387.168	0.76749	0.23251		358.116	0.90276	0.09724		358.112	0.90853	0.09147		387.149	0.95318	0.04682		387.151	0.50545	0.49455		385.634	0.53215	0.46785
										387.408	0.50441	0.49559		387.409	0.53382	0.46618		387.417	0.59097	0.40903		387.406	0.60063	0.39937		387.424	0.76044	0.23956		358.352	0.91357	0.08643		358.349	0.90268	0.09732		387.405	0.48213	0.51787		387.406	0.51641	0.48359		385.889	0.43403	0.56597
										387.664	0.50286	0.49714		387.665	0.54293	0.45707		387.673	0.59086	0.40914		387.663	0.63624	0.36376		387.681	0.76985	0.23015		358.589	0.88301	0.11699		358.586	0.91817	0.08183		387.661	0.50759	0.49241		387.662	0.50966	0.49034		386.145	0.53828	0.46172
										387.92	0.51229	0.48771		387.921	0.54041	0.45959		387.929	0.57339	0.42661		387.919	0.60573	0.39427		387.936	0.76568	0.23432		358.826	0.91308	0.08692		358.823	0.91852	0.08148		387.918	0.45214	0.54786		387.919	0.5047	0.4953		386.399	0.5311	0.4689
										388.176	0.5282	0.4718		388.177	0.54186	0.45814		388.185	0.58611	0.41389		388.175	0.63204	0.36796		388.193	0.76022	0.23978		359.064	0.9186	0.0814		359.06	0.9218	0.0782		388.173	0.64403	0.35597		388.175	0.50379	0.49621		386.654	0.53941	0.46059
										388.432	0.52508	0.47492		388.435	0.55521	0.44479		388.442	0.54639	0.45361		388.431	0.6508	0.3492		388.448	0.75831	0.24169		359.3	0.90913	0.09087		359.296	0.91204	0.08796		388.429	0.50232	0.49768		388.43	0.51357	0.48643		386.91	0.52472	0.47528
										388.688	0.50075	0.49925		388.69	0.53891	0.46109		388.697	0.57958	0.42042		388.687	0.64067	0.35933		388.705	0.77005	0.22995		359.537	0.91645	0.08355		359.533	0.90185	0.09815		388.686	0.50359	0.49641		388.687	0.4769	0.5231		387.164	0.53843	0.46157
										388.944	0.51067	0.48933		388.946	0.53274	0.46726		388.954	0.58199	0.41801		388.943	0.699	0.301		388.961	0.75487	0.24513		359.774	0.91249	0.08751		359.77	0.90995	0.09005		388.941	0.46935	0.53065		388.943	0.50631	0.49369		387.42	0.53526	0.46474
										389.201	0.54359	0.45641		389.202	0.55832	0.44168		389.209	0.58934	0.41066		389.199	0.6413	0.3587		389.217	0.76359	0.23641		360.011	0.90269	0.09731		360.007	0.91985	0.08015		389.198	0.52045	0.47955		389.198	0.5226	0.4774		387.675	0.52578	0.47422
										389.456	0.48485	0.51515		389.458	0.5371	0.4629		389.466	0.59124	0.40876		389.455	0.66023	0.33977		389.473	0.74683	0.25317		360.248	0.92621	0.07379		360.244	0.92269	0.07731		389.454	0.7901	0.2099		389.454	0.50257	0.49743		387.93	0.53675	0.46325
										389.713	0.50602	0.49398		389.714	0.5418	0.4582		389.721	0.58345	0.41655		389.711	0.64349	0.35651		389.729	0.76393	0.23607		360.484	0.91231	0.08769		360.48	0.91568	0.08432		389.71	0.57802	0.42198		389.711	0.51588	0.48412		388.184	0.5325	0.4675
										389.969	0.51845	0.48155		389.969	0.53726	0.46274		389.978	0.58054	0.41946		389.967	0.58655	0.41345		389.985	0.7672	0.2328		360.721	0.91358	0.08642		360.717	0.907	0.093		389.965	0.63931	0.36069		389.967	0.53185	0.46815		388.439	0.52891	0.47109
										390.225	0.51903	0.48097		390.226	0.55102	0.44898		390.233	0.58958	0.41042		390.223	0.63729	0.36271		390.24	0.76177	0.23823		360.957	0.92005	0.07995		360.954	0.91674	0.08326		390.221	0.47459	0.52541		390.222	0.50212	0.49788		388.695	0.52096	0.47904
										390.48	0.51767	0.48233		390.482	0.53616	0.46384		390.489	0.58317	0.41683		390.479	0.6355	0.3645		390.497	0.74112	0.25888		361.195	0.91115	0.08885		361.192	0.91906	0.08094		390.477	0.50461	0.49539		390.479	0.5062	0.4938		388.95	0.53078	0.46922
										390.737	0.50036	0.49964		390.738	0.54331	0.45669		390.745	0.58447	0.41553		390.735	0.62475	0.37525		390.753	0.74817	0.25183		361.432	0.90054	0.09946		361.429	0.90509	0.09491		390.733	0.53989	0.46011		390.735	0.45188	0.54812		389.205	0.53583	0.46417
										390.993	0.49866	0.50134		390.994	0.54221	0.45779		391.002	0.58078	0.41922		390.992	0.59715	0.40285		391.009	0.74228	0.25772		361.669	0.90796	0.09204		361.664	0.90042	0.09958		390.989	0.49842	0.50158		390.991	0.50379	0.49621		389.459	0.53978	0.46022
										391.249	0.50859	0.49141		391.251	0.5303	0.4697		391.258	0.59265	0.40735		391.247	0.64537	0.35463		391.265	0.74648	0.25352		361.906	0.91027	0.08973		361.901	0.92073	0.07927		391.245	0.48511	0.51489		391.248	0.51645	0.48355		389.715	0.53658	0.46342
										391.506	0.50267	0.49733		391.506	0.54528	0.45472		391.514	0.57752	0.42248		391.503	0.63922	0.36078		391.521	0.75822	0.24178		362.142	0.91203	0.08797		362.139	0.91258	0.08742		391.502	0.52049	0.47951		391.503	0.49232	0.50768		389.97	0.52318	0.47682
										391.761	0.5072	0.4928		391.762	0.53282	0.46718		391.77	0.52352	0.47648		391.759	0.59923	0.40077		391.777	0.74878	0.25122		362.379	0.8971	0.1029		362.376	0.91182	0.08818		391.758	0.46282	0.53718		391.76	0.47699	0.52301		390.225	0.52628	0.47372
										392.017	0.52025	0.47975		392.018	0.53741	0.46259		392.026	0.41359	0.58641		392.015	0.64084	0.35916		392.033	0.76337	0.23663		362.616	0.91041	0.08959		362.612	0.90512	0.09488		392.014	0.48463	0.51537		392.015	0.49853	0.50147		390.48	0.52646	0.47354
										392.274	0.51569	0.48431		392.274	0.53896	0.46104		392.282	0.58177	0.41823		392.272	0.65408	0.34592		392.289	0.76502	0.23498		362.853	0.92127	0.07873		362.849	0.91746	0.08254		392.27	0.56318	0.43682		392.272	0.49559	0.50441		390.735	0.53736	0.46264
										392.53	0.49927	0.50073		392.531	0.53499	0.46501		392.538	0.59425	0.40575		392.527	0.63456	0.36544		392.545	0.76654	0.23346		363.09	0.90971	0.09029		363.086	0.92404	0.07596		392.526	0.4795	0.5205		392.527	0.52793	0.47207		390.99	0.52356	0.47644
										392.785	0.56462	0.43538		392.786	0.55028	0.44972		392.793	0.65162	0.34838		392.784	0.64032	0.35968		392.801	0.74876	0.25124		363.326	0.90344	0.09656		363.323	0.9132	0.0868		392.782	0.35129	0.64871		392.783	0.52467	0.47533		391.246	0.52869	0.47131
										393.042	0.50639	0.49361		393.043	0.53504	0.46496		393.05	0.56757	0.43243		393.04	0.6492	0.3508		393.057	0.74253	0.25747		363.564	0.91849	0.08151		363.559	0.88767	0.11233		393.038	0.53089	0.46911		393.04	0.46556	0.53444		391.5	0.53714	0.46286
										393.298	0.51718	0.48282		393.298	0.55452	0.44548		393.306	0.5665	0.4335		393.296	0.6383	0.3617		393.314	0.74669	0.25331		363.801	0.90879	0.09121		363.795	0.92144	0.07856		393.294	0.44754	0.55246		393.295	0.50058	0.49942		391.755	0.52302	0.47698
										393.553	0.50142	0.49858		393.554	0.54163	0.45837		393.562	0.56918	0.43082		393.552	0.64679	0.35321		393.569	0.74705	0.25295		364.037	0.92268	0.07732		364.033	0.90712	0.09288		393.549	0.50434	0.49566		393.551	0.54346	0.45654		392.01	0.5372	0.4628
										393.809	0.48681	0.51319		393.81	0.53753	0.46247		393.819	0.56715	0.43285		393.808	0.62842	0.37158		393.826	0.76605	0.23395		364.274	0.9019	0.0981		364.27	0.91167	0.08833		393.806	0.50236	0.49764		393.808	0.51286	0.48714		392.266	0.53933	0.46067
										394.065	0.49405	0.50595		394.067	0.54042	0.45958		394.074	0.57106	0.42894		394.064	0.64417	0.35583		394.082	0.76081	0.23919		364.51	0.91315	0.08685		364.508	0.91433	0.08567		394.063	0.48442	0.51558		394.063	0.52491	0.47509		392.52	0.5199	0.4801
										394.321	0.49791	0.50209		394.323	0.53702	0.46298		394.33	0.38429	0.61571		394.32	0.64162	0.35838		394.338	0.75175	0.24825		364.748	0.91109	0.08891		364.744	0.90274	0.09726		394.318	0.50672	0.49328		394.319	0.49907	0.50093		392.776	0.54426	0.45574
										394.578	0.52755	0.47245		394.579	0.53921	0.46079		394.587	0.59014	0.40986		394.576	0.62949	0.37051		394.594	0.75009	0.24991		364.984	0.90941	0.09059		364.981	0.92138	0.07862		394.574	0.49353	0.50647		394.575	0.50296	0.49704		393.03	0.5426	0.4574
										394.833	0.50458	0.49542		394.834	0.54494	0.45506		394.842	0.58827	0.41173		394.832	0.62265	0.37735		394.849	0.75945	0.24055		365.222	0.91766	0.08234		365.217	0.90627	0.09373		394.83	0.49455	0.50545		394.832	0.4916	0.5084		393.285	0.52705	0.47295
										395.09	0.50257	0.49743		395.091	0.55044	0.44956		395.098	0.55772	0.44228		395.087	0.63319	0.36681		395.105	0.75875	0.24125		365.457	0.90487	0.09513		365.455	0.90828	0.09172		395.086	0.502	0.498		395.089	0.51111	0.48889		393.541	0.52851	0.47149
										395.346	0.51428	0.48572		395.347	0.539	0.461		395.354	0.58684	0.41316		395.343	0.62819	0.37181		395.361	0.75267	0.24733		365.695	0.90913	0.09087		365.691	0.90154	0.09846		395.342	0.49597	0.50403		395.345	0.47989	0.52011		393.795	0.53991	0.46009
										395.601	0.50686	0.49314		395.603	0.53017	0.46983		395.611	0.56542	0.43458		395.6	0.64439	0.35561		395.617	0.76697	0.23303		365.932	0.89437	0.10563		365.929	0.90697	0.09303		395.598	0.49715	0.50285		395.6	0.53133	0.46867		394.051	0.5284	0.4716
										395.858	0.54256	0.45744		395.86	0.54865	0.45135		395.867	0.57042	0.42958		395.856	0.6309	0.3691		395.873	0.74803	0.25197		366.169	0.90399	0.09601		366.164	0.91127	0.08873		395.855	0.47915	0.52085		395.857	0.53281	0.46719		394.305	0.52819	0.47181
										396.114	0.48001	0.51999		396.116	0.52808	0.47192		396.122	1.01172	-0.01172		396.113	0.63998	0.36002		396.129	0.75166	0.24834		366.405	0.90643	0.09357		366.402	0.90758	0.09242		396.11	0.46858	0.53142		396.113	0.47757	0.52243		394.561	0.53516	0.46484
										396.371	0.48318	0.51682		396.371	0.54861	0.45139		396.379	0.58318	0.41682		396.369	0.62645	0.37355		396.385	0.75288	0.24712		366.642	0.90002	0.09998		366.639	0.89243	0.10757		396.367	0.49448	0.50552		396.369	0.50022	0.49978		394.816	0.52892	0.47108
										396.627	0.46603	0.53397		396.627	0.55328	0.44672		396.634	0.57395	0.42605		396.624	0.63562	0.36438		396.642	0.74682	0.25318		366.879	0.9248	0.0752		366.875	0.89812	0.10188		396.622	0.49685	0.50315		396.626	0.5289	0.4711		395.071	0.53919	0.46081
										396.882	0.54957	0.45043		396.883	0.5466	0.4534		396.891	0.58024	0.41976		396.88	0.58025	0.41975		396.897	0.76077	0.23923		367.116	0.91779	0.08221		367.111	0.91361	0.08639		396.879	0.48267	0.51733		396.882	0.50909	0.49091		395.325	0.52468	0.47532
										397.139	0.52589	0.47411		397.139	0.54091	0.45909		397.147	0.58868	0.41132		397.136	0.64162	0.35838		397.153	0.75967	0.24033		367.353	0.91383	0.08617		367.348	0.90627	0.09373		397.136	0.50756	0.49244		397.137	0.47848	0.52152		395.581	0.53542	0.46458
										397.395	0.52394	0.47606		397.396	0.53245	0.46755		397.403	0.58784	0.41216		397.393	0.47371	0.52629		397.41	0.73998	0.26002		367.59	0.90548	0.09452		367.585	0.90557	0.09443		397.391	0.51142	0.48858		397.394	0.50081	0.49919		395.836	0.53033	0.46967
										397.651	0.47789	0.52211		397.651	0.5343	0.4657		397.659	0.57982	0.42018		397.648	0.62263	0.37737		397.667	0.7629	0.2371		367.827	0.91167	0.08833		367.823	0.92477	0.07523		397.647	0.47421	0.52579		397.65	0.50924	0.49076		396.091	0.531	0.469
										397.906	0.49942	0.50058		397.907	0.53716	0.46284		397.916	0.58164	0.41836		397.904	0.63393	0.36607		397.922	0.76596	0.23404		368.063	0.90748	0.09252		368.06	0.91049	0.08951		397.903	0.60007	0.39993		397.906	0.469	0.531		396.346	0.52876	0.47124
										398.163	0.50158	0.49842		398.163	0.53865	0.46135		398.171	0.58697	0.41303		398.161	0.6295	0.3705		398.178	0.75113	0.24887		368.3	0.91471	0.08529		368.296	0.90185	0.09815		398.159	0.48939	0.51061		398.162	0.51132	0.48868		396.602	0.51875	0.48125
										398.418	0.51629	0.48371		398.42	0.54463	0.45537		398.427	0.38475	0.61525		398.417	0.63567	0.36433		398.435	0.74589	0.25411		368.538	0.89991	0.10009		368.533	0.90269	0.09731		398.415	0.4867	0.5133		398.417	0.50319	0.49681		396.856	0.53074	0.46926
										398.674	0.53082	0.46918		398.676	0.5403	0.4597		398.684	0.55983	0.44017		398.673	0.66615	0.33385		398.69	0.74885	0.25115		368.774	0.90323	0.09677		368.77	0.89726	0.10274		398.671	0.40847	0.59153		398.673	0.53496	0.46504		397.111	0.52975	0.47025
										398.931	0.51165	0.48835		398.932	0.5347	0.4653		398.939	0.57369	0.42631		398.929	0.6215	0.3785		398.946	0.76357	0.23643		369.011	0.90582	0.09418		369.007	0.88786	0.11214		398.927	0.51861	0.48139		398.93	0.51282	0.48718		397.367	0.5396	0.4604
										399.187	0.48995	0.51005		399.188	0.55337	0.44663		399.195	0.58726	0.41274		399.185	0.63184	0.36816		399.202	0.73538	0.26462		369.248	0.89843	0.10157		369.244	0.89825	0.10175		399.183	0.50088	0.49912		399.186	0.50581	0.49419		397.621	0.52798	0.47202
[truncated: 20,248 more rows]
[truncated: 238 more columns]
